# Supplementary material for: Hydrogen Bonding-directed Sequential 1,6/1,4-Addition of Heteroatom Nucleophiles onto Electron-deficient 1,3-Diynes
Source: Royal Society of Chemistry journal article supplement (doi:10.1039/d2qo01730j), 2022-11-29

Supporting Information

For

**Hydrogen Bonding-directed Sequential 1,6/1,4-  
Addition of Heteroatom Nucleophiles onto  
Electron-deficient 1,3-Diynes**

Erandi Liyanage Perera<sup>†</sup> and Daesung Lee<sup>†\*</sup>

<sup>†</sup> Department of Chemistry, University of Illinois Chicago, 845 West Taylor Street, Chicago, Illinois 60607, United States.

\* E-mail: dsunglee@uic.edu (D. L.)

**Contents**

|                                                              |          |
|--------------------------------------------------------------|----------|
| General Information                                          | S1       |
| Experimental Details and General Procedures                  | S2–S9    |
| Supplementary Table                                          | S10      |
| Characterization Data of Substrates                          | S11–S14  |
| Characterization Data of Products                            | S15–S25  |
| <sup>1</sup> H and <sup>13</sup> C NMR Spectra of Substrates | S26–S46  |
| <sup>1</sup> H and <sup>13</sup> C NMR Spectra of Products   | S47–S104 |

## General Information

All reactions were carried out in oven or flame-dried glassware unless otherwise noted. Reagents which were commercially available, were purchased from Sigma - Aldrich, Alfa Aesar, Acros, and Oakwood Products unless otherwise noted. Known compounds were prepared according to literature procedure. Anhydrous acetonitrile from Sigma-Aldrich was distilled over calcium hydride ( $\text{CaH}_2$ ) under nitrogen atmosphere. Acetic acid was purchased from Fischer Scientific. Column chromatography was performed using silica gel 60 Å (32–63 mesh) purchased from Silicycle Inc. Analytical thin layer chromatography (TLC) was performed on 0.25 mm E. Merck precoated silica gel 60 (particle size 0.040–0.063 mm). Yield was calculated on basis of chromatographically and spectroscopically pure isolated compound.  $^1\text{H}$  NMR and  $^{13}\text{C}$  NMR spectra were recorded on a Bruker AV-500 spectrometer at 298 K, unless otherwise stated.  $^1\text{H}$  NMR chemical shifts ( $\delta$ ) were reported in parts per million (ppm) downfield of TMS and were referenced relative to the residual proteated solvent peak ( $\text{CDCl}_3$  (7.26 ppm)).  $^{13}\text{C}$  chemical shifts ( $\delta$ ) were reported in parts per million downfield of TMS and are referenced to the carbon resonance of the solvent ( $\text{CDCl}_3$ ,  $\delta$  77.2 ppm). Multiplicities in  $^1\text{H}$  NMR were abbreviated by s (singlet), d (doublet), t (triplet), q (quartet), quin (quintet), sext (sextet), sept (septet) or m (multiplet).  $^1\text{H}$  NMR signals that fall within a *ca.* 0.3 ppm range are generally reported as a multiplet, with a range of chemical shift values corresponding to the peak or center of the peak. Coupling constants, *J*, are reported in Hz (Hertz). Electrospray ionization (ESI) mass spectra were recorded on a Waters Micromass Q-ToF Ultima (Waters Corporation, Milford, MA, USA) at the University of Illinois at Urbana-Champaign.

## Experimental Details

### Procedure for synthesis of diynone substrates

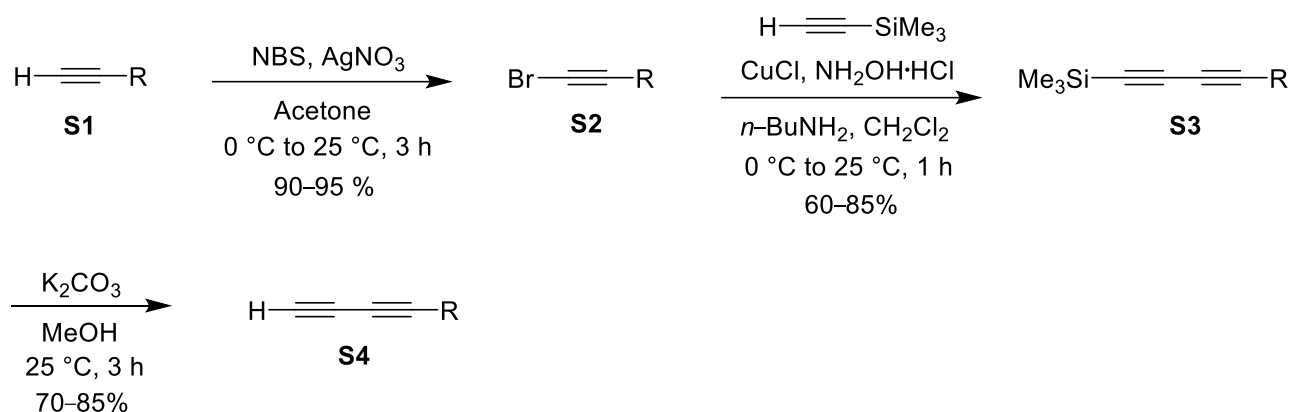

To a stirred solution of alkyne **S1** (5.05 g, 60.0 mmol) in acetone at 25 °C, *N*-bromosuccinimide (12.81 g, 72.0 mmol) and AgNO<sub>3</sub> (1.02 g, 6.0 mmol) were sequentially added under N<sub>2</sub> atmosphere in the dark. After addition, the mixture was stirred for 3 h. Upon complete consumption of the alkyne, the reaction mixture was concentrated under reduced pressure and filtered through silica gel. Purification by flash column chromatography (SiO<sub>2</sub>, EtOAc–hexane, 1:5 to 1:3) provided the bromide **S2** (8.81–9.30 g, 90–95% yield) as clear oil.

To a mixture of 30% aqueous *n*-BuNH<sub>2</sub> (20 mL, 2 mL per 1.0 mmol of terminal alkyne), CuCl (0.29 g, 3.0 mmol) and a pinch of NH<sub>2</sub>OH·HCl in a two-necked round-bottomed flask, a solution of terminal alkyne (0.98 g, 10.0 mmol) in CH<sub>2</sub>Cl<sub>2</sub> was added slowly at 0 °C under N<sub>2</sub> atmosphere. Then, **S2** (1.96 g, 12.0 mmol) diluted in CH<sub>2</sub>Cl<sub>2</sub> was added dropwise into the reaction mixture over 30 min. After 5 min, the ice bath was removed and stirring was continued for additional 25 min at room temperature (TLC monitoring). A pinch of NH<sub>2</sub>OH·HCl was added several times into the reaction mixture when the solution becomes blue. The reaction was quenched by a saturated solution of NH<sub>4</sub>Cl and extracted with CH<sub>2</sub>Cl<sub>2</sub>. The combined organic extracts were washed with water and brine sequentially and dried over anhydrous Na<sub>2</sub>SO<sub>4</sub> and concentrated under reduced pressure. The crude material was purified by flash column chromatography (SiO<sub>2</sub>, EtOAc–hexane, 1:50 to 1:20) to provide the pure diyne **S3** (1.30–1.84 g, 60–85% yield) as white solid.

To a stirred solution of **S3** (1.37 g, 4.0 mmol) in MeOH at 25 °C, K<sub>2</sub>CO<sub>3</sub> (0.55 g, 4.0 mmol) was added and the stirring was continued for additional 3 h. Then, the reaction was quenched by a saturated solution of NH<sub>4</sub>Cl and extracted with Et<sub>2</sub>O. The combined organic extracts were washed with water and brine sequentially and dried over anhydrous Na<sub>2</sub>SO<sub>4</sub> and concentrated under reduced pressure and ice. The crude material was purified by flash column chromatography (SiO<sub>2</sub>, Et<sub>2</sub>O–pentane, 1:10 to 1:5) to provide the pure diyne **S4** (0.58–0.70 g, 70–85% yield) as clear oil.

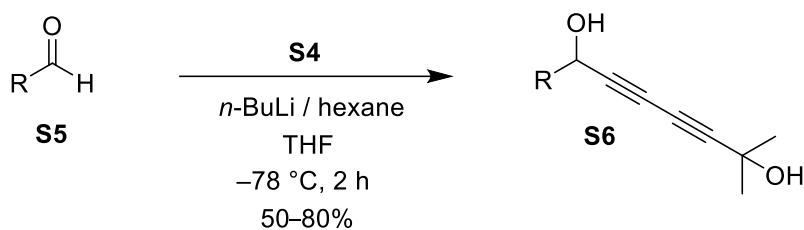

To a stirred solution of **S5** (0.27 g, 2.0 mmol) in THF at  $-78\text{ }^\circ\text{C}$ , *n*-BuLi (2.5 M, 1.76 mL, 4.4 mmol) in hexane was added slowly under  $\text{N}_2$  atmosphere and the stirring was continued for additional 40 min. The dry ice bath was removed and the diyne **S4** (0.24 g, 2.2 mmol) in THF was added. The stirring was continued for additional 1 h at room temperature. The reaction was quenched by aqueous  $\text{NH}_4\text{Cl}$  and extracted with EtOAc. The combined organic extracts were washed sequentially with water and brine and dried over anhydrous  $\text{Na}_2\text{SO}_4$  and concentrated under reduced pressure. The crude material was purified by flash column chromatography ( $\text{SiO}_2$ , EtOAc–hexane, 1:40 to 1:10) to provide pure product **S6** (0.27–0.44 g, 50–80% yield) as yellow oil.

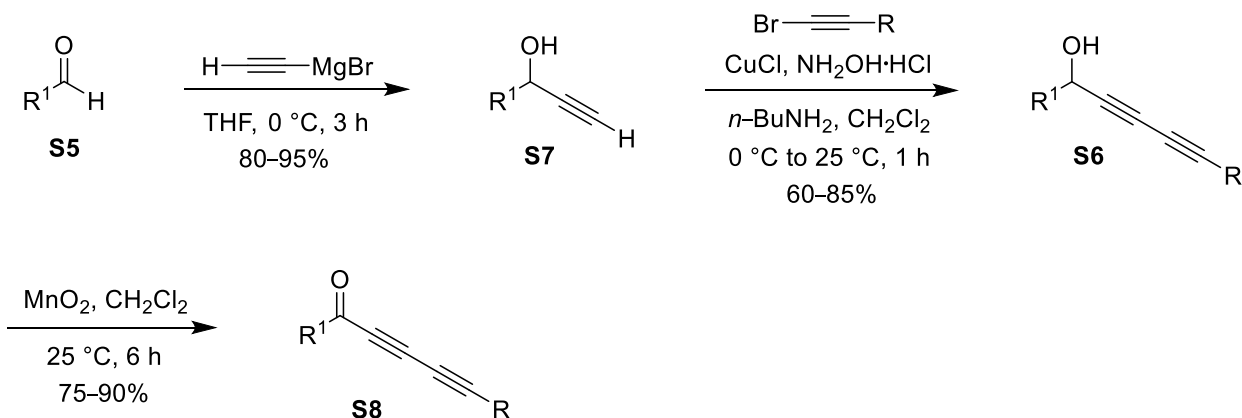

To a stirred solution of **S5** (1.06 g, 10.0 mmol) in THF at  $0\text{ }^\circ\text{C}$ , ethynyl magnesium-bromide (0.5 M, 24 mL, 12.0 mmol) in hexane was added slowly under  $\text{N}_2$  atmosphere and the mixture was stirred for 30 min and additional 2 h at room temperature. The reaction was quenched by a saturated solution of  $\text{NH}_4\text{Cl}$  and extracted with EtOAc. The combined organic extracts were washed sequentially with water and brine and dried over anhydrous  $\text{Na}_2\text{SO}_4$  and concentrated under reduced pressure. The crude material was purified by flash column chromatography ( $\text{SiO}_2$ , EtOAc–hexane, 1:50 to 1:20) to provide the pure product **S7** (1.05–1.19 g, 80–90% yield) as yellow oil.

To a mixture of 30% aqueous *n*-BuNH<sub>2</sub> (20 mL, 2 mL per 1.0 mmol of terminal alkyne), CuCl (0.29 g, 3.0 mmol) and a pinch of  $\text{NH}_2\text{OH}\cdot\text{HCl}$  in a two-necked round-bottomed flask, a solution of terminal alkyne, **S7** (1.32 g, 10.0 mmol) in  $\text{CH}_2\text{Cl}_2$  was added slowly at  $0\text{ }^\circ\text{C}$  under  $\text{N}_2$  atmosphere. Then, **S2** (1.96 g, 12.0 mmol) diluted in  $\text{CH}_2\text{Cl}_2$  was added dropwise into the reaction mixture over 30 min. After 5 min, the mixture was stirred for additional 25 min at room temperature (TLC monitoring). A pinch of  $\text{NH}_2\text{OH}\cdot\text{HCl}$  was added several times into the reaction mixture when the solution becomes blue. The reaction was quenched by a saturated solution of  $\text{NH}_4\text{Cl}$  and extracted with  $\text{CH}_2\text{Cl}_2$ . The combined organic extracts were washed sequentially with water and brine and dried over anhydrous  $\text{Na}_2\text{SO}_4$  and concentrated under reduced pressure. The crude material was purified by flash column chromatography ( $\text{SiO}_2$ , EtOAc–hexane, 1:50 to 1:20) to provide the pure product **S6** (1.28–1.82 g, 60–85% yield) as pale-yellow oil.

To a stirred solution of **S6** (0.21 g, 1.0 mmol) in CH<sub>2</sub>Cl<sub>2</sub> at 25 °C, MnO<sub>2</sub> (1.30 g, 15.0 mmol) was added and the mixture was stirred for 6 h. After the completion of the reaction, the reaction mixture was filtered through a celite column. Purification by flash column chromatography (SiO<sub>2</sub>, EtOAc–hexane, 1:40 to 1:10) provided the pure product **S8** (0.16–0.19 g, 75–90% yield) as pale-yellow solid.

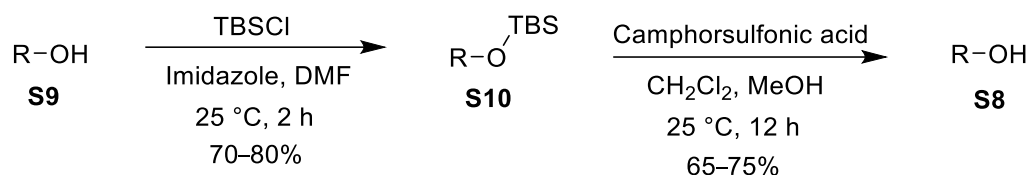

To a stirred solution of **S9** (2.02 g, 15.0 mmol) in DMF (2 mL, 1 mL per 7.5 mmol of the alcohol) at 25 °C, TBSCl (2.49 g, 16.5 mmol) and imidazole (1.23 g, 18.00 mmol) were added, and the stirring was continued for 2 h. Upon completion of the reaction, the reaction mixture was filtered through silica gel with hexane. The filtration provided the product **S10** (2.64–3.01 g, 70–80% yield) as clear oil and was used for the next step without any further purification.

For the deprotection of the alcohol, to a stirred solution of **S10** (0.32 g, 1.0 mmol) in CH<sub>2</sub>Cl<sub>2</sub>:MeOH (5:1) at 25 °C, (1S)-(+)-Camphorsulfonic acid (23.2 mg, 0.1 mmol) was added and the stirring was continued for 12 h. The reaction was quenched by a saturated solution of NH<sub>4</sub>Cl and extracted with EtOAc. The combined organic extracts were washed sequentially with water and brine and dried over anhydrous Na<sub>2</sub>SO<sub>4</sub> and concentrated under reduced pressure. The crude material was purified by flash column chromatography (SiO<sub>2</sub>, EtOAc–hexane, 1:50 to 1:20) to provide the pure alcohol **S8** (0.13–0.15 g, 65–75% yield) as yellow oil.

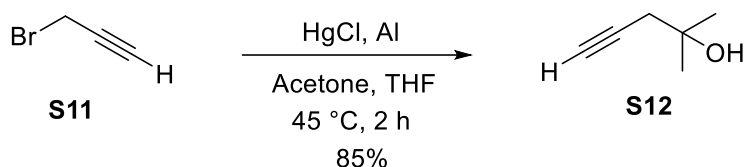

To a mixture of Al (0.27 g, 10.0 mmol) and HgCl<sub>2</sub> (27.2 mg, 0.1 mmol) in THF at 45 °C, bromide **S11** (1.19 g, 10.0 mmol) in THF was added and the mixture was stirred for 30 min. Then the reaction mixture was cooled down to 0 °C and acetone (0.9 mL, 12 mmol) in THF was added. The reaction mixture was again heated up to 45 °C and the stirring was continued for another 30 min. The reaction was quenched by pouring the reaction mixture to a solution of ice water and saturated solution of NH<sub>4</sub>Cl and extracted with Et<sub>2</sub>O. The combined organic extracts were washed sequentially with water and brine and dried over anhydrous Na<sub>2</sub>SO<sub>4</sub> and concentrated under reduced pressure and ice. The crude material was purified by flash column chromatography (SiO<sub>2</sub>, Et<sub>2</sub>O–pentane, 1:10 to 1:5) to provide the pure terminal alkyne **S12** (0.19 g, 85% yield) as clear oil.

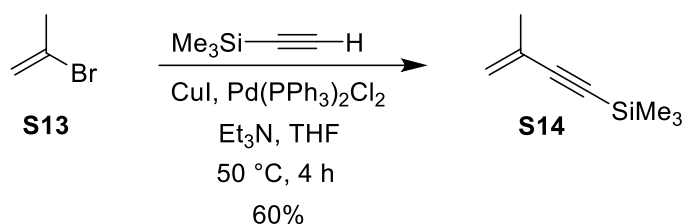

To a stirred solution of bromide **S13** (1.00 g, 8.27 mmol) in THF at 25 °C, Pd(PPh<sub>3</sub>)<sub>2</sub>Cl<sub>2</sub> (0.17 g, 0.25 mmol) and terminal alkyne (1.06 g, 10.7 mmol) were added sequentially under N<sub>2</sub> atmosphere. Then CuI (81.3 mg, 0.58 mmol) and Et<sub>3</sub>N (1.7 mL, 12.4 mmol) were added and the reaction mixture was stirred at 50 °C for 4 h. Upon completion of the reaction, the reaction mixture was concentrated under reduced pressure and filtered through silica gel. Purification by flash column chromatography (SiO<sub>2</sub>, EtOAc–hexane, 1:20) provided the enyne **S14** (0.69 g, 60% yield) as white solid.

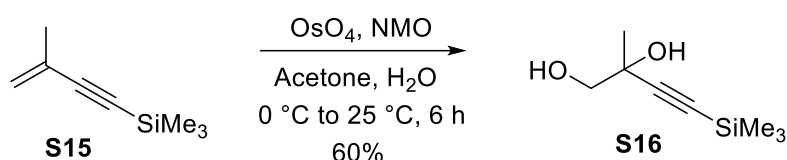

To a stirred solution of enyne **S15** (1.00 g, 7.2 mmol) in acetone at 0 °C, NMO (1.02 g, 8.7 mmol) and OsO<sub>4</sub> in water (0.09 g, 0.36 mmol) were added and the mixture was stirred at 25 °C for 6 h. The reaction was quenched by aqueous NH<sub>4</sub>Cl and extracted with CH<sub>2</sub>Cl<sub>2</sub>. The combined organic extracts were washed sequentially with water and brine and dried over anhydrous Na<sub>2</sub>SO<sub>4</sub> and concentrated under reduced pressure. The crude material was purified by flash column chromatography (SiO<sub>2</sub>, EtOAc–hexane, 1:15 to 1:10) to provide the pure diol **S16** (0.75 g, 60% yield) as white solid.

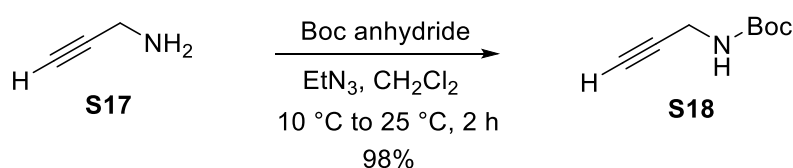

To a stirred solution of amine **S17** (1.00 g, 18 mmol) in CH<sub>2</sub>Cl<sub>2</sub> at 10 °C, NEt<sub>3</sub> (2.5 mL, 18 mmol) and Boc anhydride in CH<sub>2</sub>Cl<sub>2</sub> (7.86 g, 36 mmol) were added and the mixture was stirred at 25 °C for 2 h. The reaction was quenched by water and extracted with CH<sub>2</sub>Cl<sub>2</sub>. The combined organic extracts were washed sequentially with water and brine and dried over anhydrous Na<sub>2</sub>SO<sub>4</sub> and concentrated under reduced pressure. The crude material was purified by flash column chromatography (SiO<sub>2</sub>, EtOAc–hexane, 1:50 to 1:20) to provide the pure product **S18** (2.76 g, 98% yield) as pale-yellow solid.

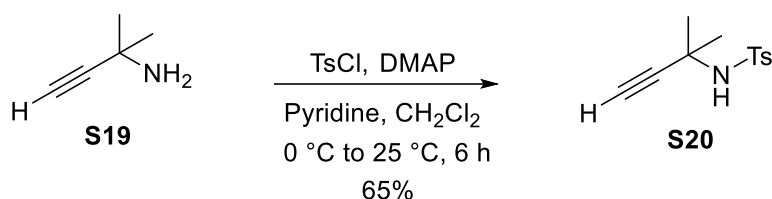

To a stirred solution of amine **S19** (0.54 g, 6.5 mmol) in CH<sub>2</sub>Cl<sub>2</sub> at 0 °C, pyridine (0.74 mL, 9.1 mmol) tosyl chloride (1.24 g, 7.8 mmol) and DMAP (6.11 mg, 0.08 mmol) were added and the mixture was stirred at 25 °C for 6 h. The reaction was quenched by water and extracted with CH<sub>2</sub>Cl<sub>2</sub>. The combined organic extracts were washed sequentially with water and brine and dried over anhydrous Na<sub>2</sub>SO<sub>4</sub> and concentrated under reduced pressure. The crude material was purified by flash column chromatography (SiO<sub>2</sub>, EtOAc–hexane, 1:50 to 1:20) to provide the pure product **S20** (1.00 g, 65% yield) as pale-yellow oil.

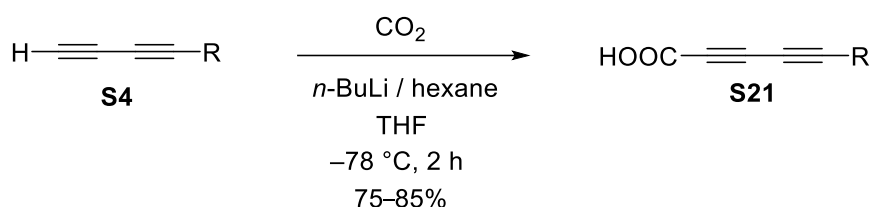

To a stirred solution of **S4** (1.00g, 9.2 mmol) in THF at –78 °C, *n*-BuLi (2.5 M, 7.40 mL, 1.8 mmol) in hexane was added slowly under N<sub>2</sub> atmosphere and the stirring was continued for additional 30 min. Then CO<sub>2</sub> was bubbled into the reaction mixture at –78 °C and the dry ice bath was removed. The stirring was continued for additional 1 h at room temperature. The reaction was quenched by aqueous HCl (1M) and extracted with EtOAc. The combined organic extracts were washed sequentially with water and brine and dried over anhydrous Na<sub>2</sub>SO<sub>4</sub> and concentrated under reduced pressure. The crude material was purified by flash column chromatography (SiO<sub>2</sub>, EtOAc–hexane, 1:20 to 1:5) to provide pure product **S21** (1.06–1.20 g, 75–85% yield) as pale-yellow solid.

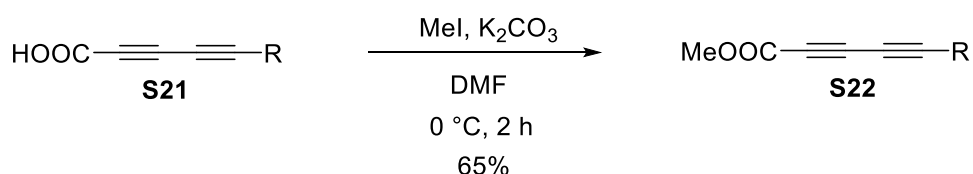

To a stirred solution of **S21** (0.20 g, 1.3 mmol) in DMF at 0 °C under N<sub>2</sub> atmosphere, K<sub>2</sub>CO<sub>3</sub> (0.20 g, 1.5 mmol) and MeI (0.40 g, 2.8 mmol) were added and the mixture was stirred at 0 °C for 30 minutes. Then the ice bath was removed and stirring was continued for additional 1 h at room temperature. The reaction was quenched by aqueous NH<sub>4</sub>Cl and extracted with EtOAc. The combined organic extracts were washed sequentially with water and brine and dried over anhydrous Na<sub>2</sub>SO<sub>4</sub> and concentrated under reduced pressure. The crude material was purified by flash column chromatography (SiO<sub>2</sub>, EtOAc–hexane, 1:10 to 1:4) to provide the pure product **S22** (0.14 g, 65% yield) as pale-yellow oil.

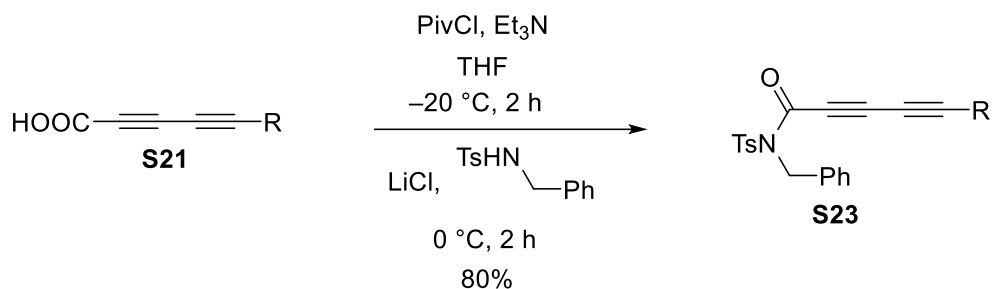

To a stirred solution of **S21** (0.10 g, 0.7 mmol) in THF at  $-20\text{ }^\circ\text{C}$  under  $\text{N}_2$  atmosphere, PivCl (0.11 g, 0.9 mmol) and  $\text{Et}_3\text{N}$  (0.23 mL, 1.6 mmol) were added and the mixture was stirred at  $-20\text{ }^\circ\text{C}$  for 2 hours. Then LiCl (0.04g, 1.0 mmol) and the amine (0.17g, 0.7 mmol) were added and the dry ice bath was removed and stirring was continued for additional 1 h at room temperature. The reaction was quenched by aqueous  $\text{NH}_4\text{Cl}$  and extracted with EtOAc. The combined organic extracts were washed sequentially with water and brine and dried over anhydrous  $\text{Na}_2\text{SO}_4$  and concentrated under reduced pressure. The crude material was purified by flash column chromatography ( $\text{SiO}_2$ , EtOAc–hexane, 1:20 to 1:10) to provide the pure product **S23** (0.21 g, 80% yield) as pale-yellow oil.

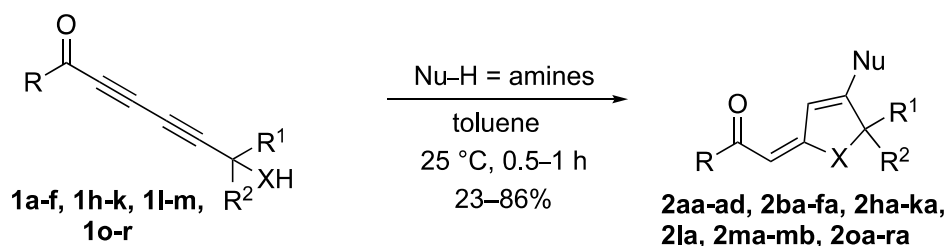

To a stirred solution of **1a-f, 1h-k, 1l-m, 1o-r** (45 mg, 0.2 mmol) in toluene at  $25\text{ }^\circ\text{C}$ , Nu-H (0.04 mL, 0.4 mmol) was added. Then the reaction mixture was stirred for 0.5–1 h. Upon completion of the reaction, the crude material was purified by flash column chromatography ( $\text{SiO}_2$ , EtOAc–hexane, 1:10 to 1:1) to provide pure products **2aa-ad, 2ba-fa, 2ha-ka, 2la, 2ma-mb, 2oa-ra** (15–54 mg, 23–86% yield) as an oil.

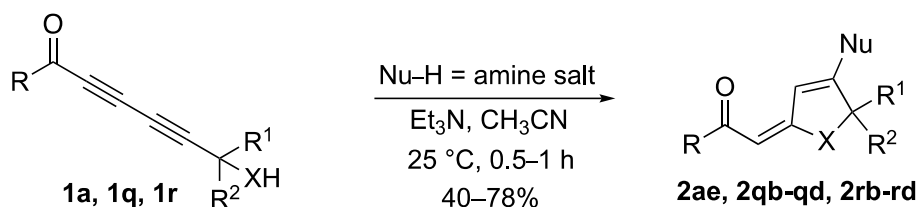

To a stirred solution of **1a, 1q, 1r** (45 mg, 0.2 mmol) in  $\text{CH}_3\text{CN}$  at  $25\text{ }^\circ\text{C}$ ,  $\text{Et}_3\text{N}$  (0.09 mL, 0.6 mmol) and Nu-H (0.04 mL, 0.4 mmol) were added. Then the reaction mixture was stirred for 0.5–1 h. Upon completion of the reaction, the crude material was purified by flash column chromatography ( $\text{SiO}_2$ , EtOAc–hexane, 1:10 to 1:1) to provide pure products **2ae, 2qb-qd, 2rb-rd** (25–49 mg, 40–78% yield) as an oil.



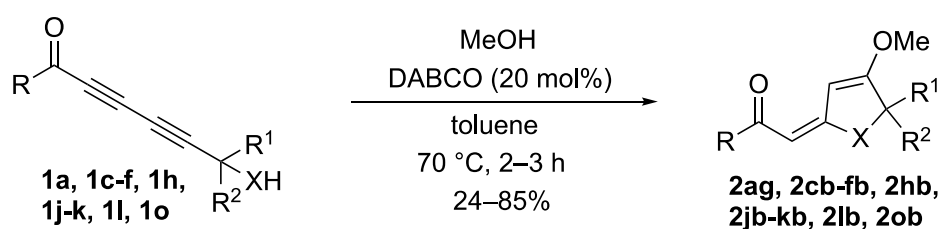

To a stirred solution of **1a, 1c-f, 1h, 1j-k, 1l, 1o** (45 mg, 0.2 mmol) in toluene at 70 °C, DABCO (5 mg, 0.04 mmol) and MeOH (0.04 mL, 1.0 mmol) were added. Then the reaction mixture was stirred for 2–3 h. Upon completion of the reaction, the crude material was purified by flash column chromatography (SiO<sub>2</sub>, EtOAc–hexane, 1:10 to 1:5) to provide pure products **2ag, 2cb-fb, 2hb, 2jb-kb, 2lb, 2ob** (13–44 mg, 24–85% yield) as an oil.

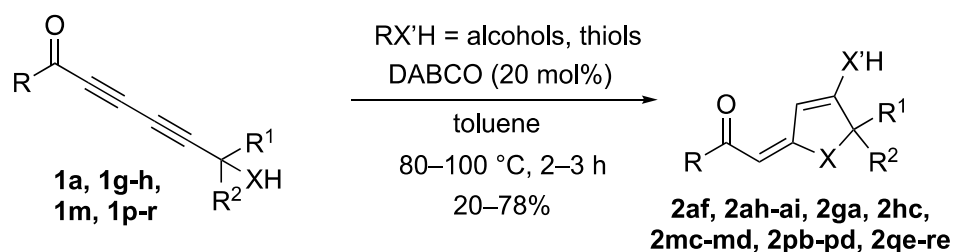

To a stirred solution of **1a, 1g-h, 1m, 1p-r** (45 mg, 0.2 mmol) in toluene at 80–100 °C, DABCO (5 mg, 0.04 mmol) and RX'H (46 mg, 0.4 mmol) were added. Then the reaction mixture was stirred for 2–3 h. Upon completion of the reaction, the crude material was purified by flash column chromatography (SiO<sub>2</sub>, EtOAc–hexane, 1:10 to 1:5) to provide pure products **2af, 2ah-ai, 2ga, 2hc, 2mc-md, 2pb-pd, 2qe-re** (14–53 mg, 20–78% yield) as an oil.

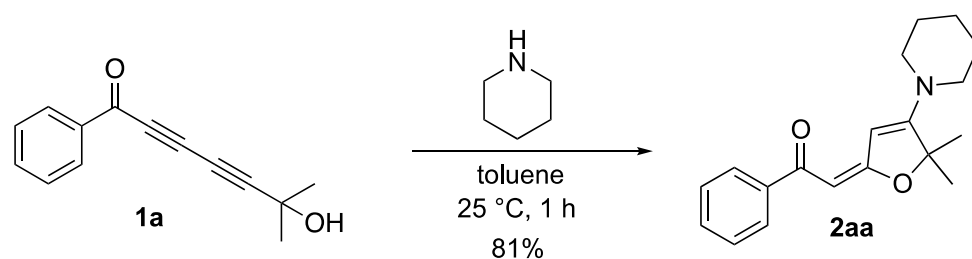

To a stirred solution of **1a** (0.28 g, 1.3 mmol) in toluene at 25 °C, piperidine (0.28 mL, 2.6 mmol) was added. Then the reaction mixture was stirred for 0.5 h. Upon completion of the reaction, the crude material was purified by flash column chromatography (SiO<sub>2</sub>, EtOAc–hexane, 1:10 to 1:2) to provide pure product **2aa** (0.32 g, 81% yield) as a pale-yellow oil.

## References:

1. H. Hofmeister, K. Annen, H. Laurent, H. Wiechert, *Angew. Chem., Int. Ed.* **1984**, 23, 727.
2. (a) W. Chodkiewicz, *Ann. Chim.* **1957**, 2, 819. (b) P. Cadiot, W. Chodkiewicz, In *Chemistry of Acetylenes* (Ed.: H. G. Viehe), Marcel Dekker, New York, **1969**, pp. 597.
3. For **2al'**: (a) Fan, M.-J.; Li, G.-Q.; Liang, Y.-M. DABCO-catalyzed reaction of various nucleophiles with activated alkynes leading to the formation of alkenoic acid esters, 1,4-dioxane, morpholine, and piperazinone derivatives. *Tetrahedron* **2006**, 62, 6782–6791. (b) Nguyen, Van T. H.; Anders, J. T.; Ma, Q.; Herbs-Irmer, R.; Langer, P. Synthesis of 5-alkylidene-2,5-dihydropyrrol-2-ones and their ring-transformation into 5,6-dihydrobenzo[h]chromones, 5,6,7,8-tetrahydrochromones and pyran-4-ones. *Tetrahedron* **2007**, 63, 12975.

**Table S1. Optimizing Reaction Conditions with Screening Solvents, Temperature and Base Additives**

Condition<sup>a</sup>  
Nu-H  
additive (20 mol%)  
solvent

**1a**  **2a**

| entry | Nu-H                    | additive          | solvent                         | temp (°C) | time (h) | yield (%) <sup>b</sup> |
|-------|-------------------------|-------------------|---------------------------------|-----------|----------|------------------------|
| 1     | none                    | DABCO             | toluene                         | 90        | 6.0      | 0                      |
| 2     | piperidine <sup>c</sup> | none              | toluene                         | rt        | 0.5      | 78                     |
| 3     | piperidine              | none              | CH <sub>3</sub> CN              | rt        | 0.5      | 52                     |
| 4     | piperidine              | none              | CH <sub>2</sub> Cl <sub>2</sub> | rt        | 0.5      | 57                     |
| 5     | MeOH <sup>d</sup>       | none              | toluene                         | rt        | 6.0      | 0                      |
| 6     | MeOH                    | DABCO             | toluene                         | rt        | 6.0      | 0                      |
| 7     | MeOH                    | DABCO             | toluene                         | 55        | 6.0      | 0                      |
| 8     | MeOH                    | DABCO             | toluene                         | 70        | 2.5      | 72                     |
| 9     | MeOH                    | Et <sub>3</sub> N | toluene                         | 70        | 4.0      | 66                     |
| 10    | MeOH                    | pyridine          | toluene                         | 70        | 5.0      | 61                     |

<sup>a</sup>Condition: undistilled solvents and reagents. <sup>b</sup>Isolated yield. <sup>c</sup>Lower amount of piperidine (0.5 and 1 equiv) led to incomplete conversion and reaction was completed with 2 equiv amines. <sup>d</sup>With 5 equiv of MeOH.

## Characterization Data of Substrates

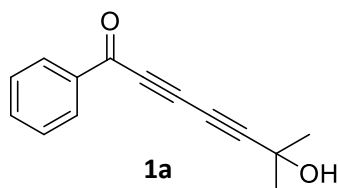

130 mg (88% yield), yellow oil, purified by flash column chromatography (SiO<sub>2</sub>, EtOAc–hexanes, 1:10). **<sup>1</sup>H NMR** (CDCl<sub>3</sub>, 500 MHz): δ 7.95 (d, 2H, *J* = 7.6 Hz), 7.48 (t, 1H, *J* = 7.5 Hz), 7.39–7.30 (m, 2H), 4.39 (s, 1H), 1.54 (s, 6H); **<sup>13</sup>C NMR** (CDCl<sub>3</sub>, 125 MHz): δ 177.1, 136.2, 134.8, 129.6, 128.7, 92.8, 77.6, 74.6, 65.5, 65.3, 30.7; **HRMS** (ESI) *m/z*: [M + H]<sup>+</sup> calcd for C<sub>14</sub>H<sub>13</sub>O<sub>2</sub> 213.0916; found 213.0915.

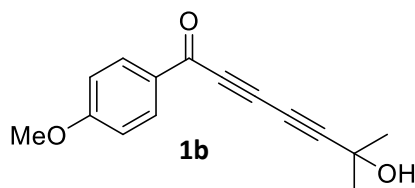

200 mg (86% yield), pale-yellow oil, purified by flash column chromatography (SiO<sub>2</sub>, EtOAc–hexanes, 1:10). **<sup>1</sup>H NMR** (CDCl<sub>3</sub>, 500 MHz): δ 8.03 (d, 2H, *J* = 8.6 Hz), 8.03 (d, 2H, *J* = 8.6 Hz), 3.84 (s, 3H), 3.27 (s, 1H), 1.58 (s, 6H); **<sup>13</sup>C NMR** (CDCl<sub>3</sub>, 125 MHz): δ 175.5, 164.9, 132.1, 129.9, 114.0, 91.5, 76.2, 75.0, 65.6, 65.7, 55.7, 30.8; **HRMS** (ESI) *m/z*: [M + H]<sup>+</sup> calcd for C<sub>15</sub>H<sub>15</sub>O<sub>3</sub> 243.1021; found 243.1021.

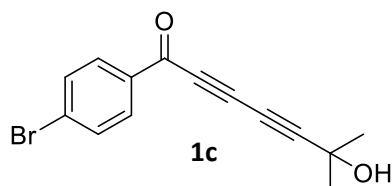

800 mg (89% yield), orange solid, purified by flash column chromatography (SiO<sub>2</sub>, EtOAc–hexanes, 1:10). **<sup>1</sup>H NMR** (CDCl<sub>3</sub>, 500 MHz): δ 7.88 (d, 2H, *J* = 8.5 Hz), 7.56 (d, 2H, *J* = 8.5 Hz), 3.46 (s, 1H), 1.57 (s, 6H); **<sup>13</sup>C NMR** (CDCl<sub>3</sub>, 125 MHz): δ 175.9, 135.1, 132.1, 130.9, 130.3, 92.9, 77.8, 74.4, 65.6, 65.4, 30.7; **HRMS** (ESI) *m/z*: [M + H]<sup>+</sup> calcd for C<sub>14</sub>H<sub>12</sub>BrO<sub>2</sub> 291.0021; found 291.0018.

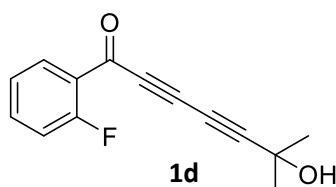

180 mg (85% yield), off white solid, purified by flash column chromatography (SiO<sub>2</sub>, EtOAc–hexanes, 1:10). **<sup>1</sup>H NMR** (CDCl<sub>3</sub>, 500 MHz): δ 8.01–7.94 (m, 1H), 7.60–7.52 (m, 1H), 7.25–7.20 (m, 1H), 7.15–7.09 (m, 1H), 3.00 (s, 1H), 1.57 (s, 6H); **<sup>13</sup>C NMR** (CDCl<sub>3</sub>, 125 MHz): δ 173.3, 162.1 (d, *J* = 263.1 Hz), 136.2 (d, *J* = 9.2 Hz), 132.0, 125.0 (d, *J* = 7.4 Hz), 124.4 (d, *J* = 4.2 Hz), 117.2 (d, *J* = 21.3 Hz), 92.9, 77.1, 75.7, 65.7, 65.6, 30.7; **HRMS** (ESI) *m/z*: [M + H]<sup>+</sup> calcd for C<sub>14</sub>H<sub>12</sub>FO<sub>2</sub> 231.0821; found 231.0820.

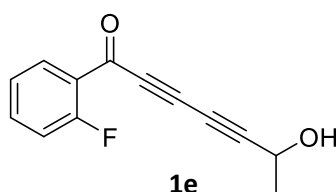

220 mg (84% yield), pale-yellow oil, purified by flash column chromatography (SiO<sub>2</sub>, EtOAc–hexanes, 1:10). **<sup>1</sup>H NMR** (CDCl<sub>3</sub>, 500 MHz): δ 8.02–7.96 (m, 1H), 7.61–7.54 (m, 1H), 7.27–7.22 (m, 1H), 7.17–7.11 (m, 1H), 4.68 (q, *J* = 6.9 Hz, 1H), 2.65 (s, 1H), 1.53 (d, *J* = 6.9 Hz, 3H); **<sup>13</sup>C NMR** (CDCl<sub>3</sub>, 125 MHz): δ 173.5, 161.1, 136.2 (d, *J* = 9.2 Hz), 132.0, 124.9, 124.4 (d, *J* = 4.0 Hz), 117.2 (d, *J* = 21.7 Hz), 90.1, 76.8, 75.6, 67.3, 58.7, 23.5; **HRMS** (ESI) *m/z*: [M + H]<sup>+</sup> calcd for C<sub>13</sub>H<sub>10</sub>FO<sub>2</sub> 217.0665; found 217.0659.

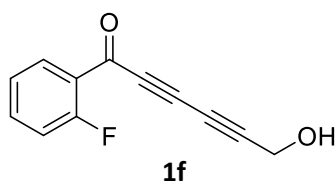

180 mg (84% yield), pale-yellow solid, purified by flash column chromatography (SiO<sub>2</sub>, EtOAc–hexanes, 1:10). **<sup>1</sup>H NMR** (CDCl<sub>3</sub>, 500 MHz): δ 8.01–7.90 (m, 1H), 7.62–7.48 (m, 1H), 7.28–7.20 (m, 1H), 7.17–7.07 (m, 1H), 4.45 (s, 2H), 3.11 (s, 1H); **<sup>13</sup>C NMR** (CDCl<sub>3</sub>, 125 MHz): δ 173.5, 163.2, 161.1, 136.4 (d, *J* = 9.7 Hz), 132.1, 124.4 (d, *J* = 4.2 Hz), 117.2 (d, *J* = 21.7 Hz), 87.2, 77.1, 75.3, 68.6, 51.3; **HRMS** (ESI) *m/z*: [M + H]<sup>+</sup> calcd for C<sub>12</sub>H<sub>8</sub>FO<sub>2</sub> 203.0508; found 203.0511.

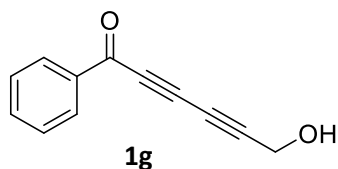

40 mg (85% yield), pale-yellow oil, purified by flash column chromatography (SiO<sub>2</sub>, EtOAc–hexanes, 1:10). **<sup>1</sup>H NMR** (CDCl<sub>3</sub>, 500 MHz): δ 8.10 (d, 2H, *J* = 7.7 Hz), 7.63 (t, 1H, *J* = 7.5 Hz), 7.49 (t, 2H, *J* = 7.7 Hz), 4.47 (s, 2H), 2.43 (s, 1H); **<sup>13</sup>C NMR** (CDCl<sub>3</sub>, 125 MHz): δ 177.1, 136.3, 134.8, 129.7, 128.8, 86.0, 76.9, 74.5, 68.8, 51.5; **HRMS** (ESI) *m/z*: [M + H]<sup>+</sup> calcd for C<sub>12</sub>H<sub>9</sub>O<sub>2</sub> 185.0603, found 185.0602.

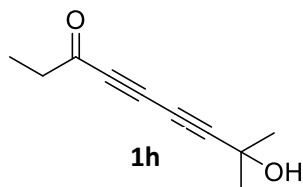

400 mg (80% yield), yellow oil, purified by flash column chromatography (SiO<sub>2</sub>, EtOAc–hexanes, 1:10). **<sup>1</sup>H NMR** (CDCl<sub>3</sub>, 500 MHz): δ 3.68 (s, 1H), 2.52 (q, 2H, *J* = 7.3 Hz), 1.47 (s, 6H), 1.06 (t, 3H, *J* = 7.3 Hz); **<sup>13</sup>C NMR** (CDCl<sub>3</sub>, 125 MHz): δ 187.9, 92.2, 75.2, 75.1, 65.4, 65.1, 38.8, 30.6, 7.8; **HRMS** (EI) *m/z*: [M]<sup>+</sup> calcd for C<sub>10</sub>H<sub>13</sub>O<sub>2</sub> 165.09156, found 165.09078.

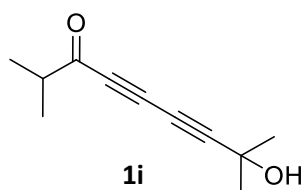

420 mg (78% yield), yellow oil, purified by flash column chromatography (SiO<sub>2</sub>, EtOAc–hexanes, 1:10). **<sup>1</sup>H NMR** (CDCl<sub>3</sub>, 500 MHz): δ 3.81 (s, 1H), 2.57 (hept, 1H, *J* = 6.9 Hz), 1.46 (s, 6H), 1.09 (d, 6H, *J* = 6.9 Hz); **<sup>13</sup>C NMR** (CDCl<sub>3</sub>, 125 MHz): δ 191.4, 92.1, 76.0, 74.5, 65.4, 65.1, 43.1, 30.6, 17.7; **HRMS** (ESI) *m/z*: [M + H]<sup>+</sup> calcd for C<sub>11</sub>H<sub>15</sub>O<sub>2</sub> 179.1072, found 179.1071.

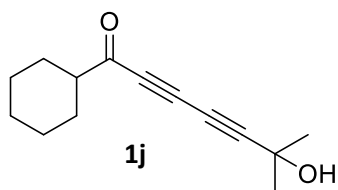

200 mg (78% yield), pale-yellow oil, purified by flash column chromatography (SiO<sub>2</sub>, EtOAc–hexanes, 1:10). **<sup>1</sup>H NMR** (CDCl<sub>3</sub>, 500 MHz): δ 2.95 (s, 1H), 2.38 (tt, 1H, *J* = 11.1, 3.6 Hz), 1.97–1.89 (m, 2H), 1.75 (dt, 2H, *J* = 13.1, 3.9 Hz), 1.66–1.58 (m, 1H), 1.53 (s, 6H), 1.43–1.33 (m, 2H), 1.32–1.21 (m, 2H), 1.23–1.14 (m, 1H); **<sup>13</sup>C NMR** (CDCl<sub>3</sub>, 125 MHz): δ 190.6, 91.8, 75.5, 75.1, 65.6, 65.4, 52.3, 30.7, 28.0, 25.6, 25.3; **HRMS** (ESI) *m/z*: [M + H]<sup>+</sup> calcd for C<sub>14</sub>H<sub>19</sub>O<sub>2</sub> 219.1385, found 219.1380.

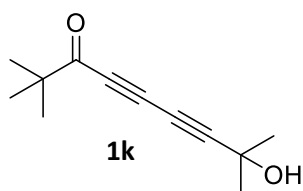

200 mg (83% yield), pale-yellow oil, purified by flash column chromatography (SiO<sub>2</sub>, EtOAc–hexanes, 1:10). **<sup>1</sup>H NMR** (CDCl<sub>3</sub>, 500 MHz): δ 2.21 (s, 1H), 1.56 (s, 6H), 1.20 (s, 9H); **<sup>13</sup>C NMR** (CDCl<sub>3</sub>, 125 MHz): δ 193.1, 91.2, 75.9, 74.3, 65.7, 65.6, 45.1, 30.8, 25.8; **HRMS** (ESI) *m/z*: [M + H]<sup>+</sup> calcd for C<sub>12</sub>H<sub>17</sub>O<sub>2</sub> 193.1229, found 193.1219.

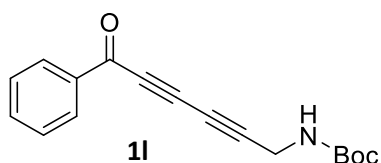

220 mg (80% yield), yellow oil, purified by flash column chromatography (SiO<sub>2</sub>, EtOAc–hexanes, 1:10). **<sup>1</sup>H NMR** (CDCl<sub>3</sub>, 500 MHz): δ 8.03 (d, 2H, *J* = 7.8 Hz), 7.56 (t, 1H, *J* = 7.4 Hz), 7.42 (t, 2H, *J* = 7.8 Hz), 5.31 (s, 1H), 4.08 (s, 2H), 1.41 (s, 9H); **<sup>13</sup>C NMR** (CDCl<sub>3</sub>, 125 MHz): δ 176.8, 155.3, 136.4, 134.6, 129.6, 128.7, 84.9, 80.5, 77.0, 73.3, 66.2, 31.2, 28.3; **HRMS** (ESI) *m/z*: [M + H]<sup>+</sup> calcd for C<sub>17</sub>H<sub>18</sub>NO<sub>3</sub> 284.1106, found 284.1102.

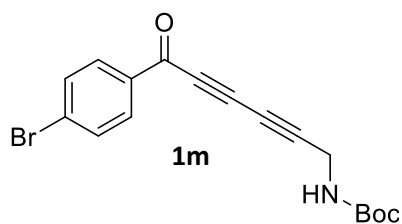

500 mg (85% yield), yellow solid, purified by flash column chromatography (SiO<sub>2</sub>, EtOAc–hexanes, 1:10). **<sup>1</sup>H NMR** (CDCl<sub>3</sub>, 500 MHz): δ 7.86 (d, 2H, *J* = 8.5 Hz), 7.55 (d, 2H, *J* = 8.5 Hz), 5.31 (s, 1H), 4.08 (d, 2H, *J* = 6.0 Hz), 1.41 (s, 9H); **<sup>13</sup>C NMR** (CDCl<sub>3</sub>, 125 MHz): δ 175.6, 155.3, 135.1, 132.1, 130.9, 130.2, 85.7, 80.4, 77.6, 72.8, 65.9, 31.2, 28.3; **HRMS** (ESI) *m/z*: [M + H]<sup>+</sup> calcd for C<sub>17</sub>H<sub>17</sub>BrNO<sub>3</sub> 362.0211, found 362.0207.

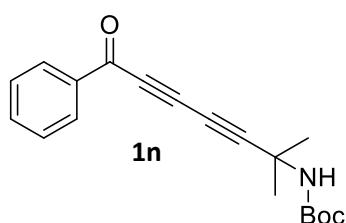

80 mg (88% yield), pale-yellow oil, purified by flash column chromatography (SiO<sub>2</sub>, EtOAc–hexanes, 1:10). **<sup>1</sup>H NMR** (CDCl<sub>3</sub>, 500 MHz): δ 8.11 (d, 2H, *J* = 7.7 Hz), 7.61 (t, 1H, *J* = 7.4 Hz), 7.48 (t, 2H, *J* = 7.7 Hz), 4.79 (s, 1H), 1.62 (s, 6H), 1.47 (s, 9H); **<sup>13</sup>C NMR** (CDCl<sub>3</sub>, 125 MHz): δ 177.0, 153.9, 136.5, 134.5, 129.7, 128.7, 91.3, 80.3, 77.4, 74.1, 64.3, 47.6, 29.1, 28.4; **HRMS** (ESI) *m/z*: [M + H]<sup>+</sup> calcd for C<sub>19</sub>H<sub>22</sub>NO<sub>3</sub> 312.1419, found 312.1421.

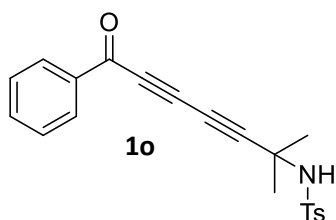

250 mg (86% yield), yellow solid, purified by flash column chromatography (SiO<sub>2</sub>, EtOAc–hexanes, 1:10). **<sup>1</sup>H NMR** (CDCl<sub>3</sub>, 500 MHz): δ 8.04 (d, 2H, *J* = 8.2 Hz), 7.84 (d, 2H, *J* = 8.3 Hz), 7.65–7.58 (m, 1H), 7.48 (t, 2H, *J* = 7.8 Hz), 7.31 (d, 2H, *J* = 8.3 Hz), 5.88 (s, 1H), 2.32 (s, 3H), 1.60 (s, 6H); **<sup>13</sup>C NMR** (CDCl<sub>3</sub>, 125 MHz): δ 176.6, 144.0, 137.9, 136.4, 134.7, 129.6, 129.6, 128.8, 127.7, 88.6, 76.3, 74.8, 66.5, 50.2, 30.2, 21.5; **HRMS** (ESI) *m/z*: [M + H]<sup>+</sup> calcd for C<sub>21</sub>H<sub>20</sub>NO<sub>3</sub>S 366.1164, found 366.1157.

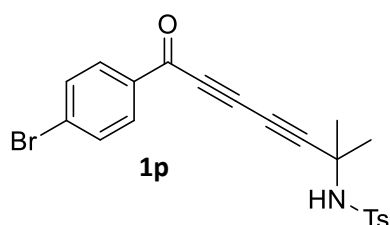

250 mg (87% yield), white solid, purified by flash column chromatography (SiO<sub>2</sub>, EtOAc–hexanes, 1:10). **<sup>1</sup>H NMR** (CDCl<sub>3</sub>, 500 MHz): δ 7.89 (d, 2H, *J* = 8.6 Hz), 7.83 (d, 2H, *J* = 8.3 Hz), 7.62 (d, 2H, *J* = 8.6 Hz), 7.31 (d, 2H, *J* = 8.3 Hz), 5.86 (s, 1H), 2.34 (s, 3H), 1.59 (s, 6H); **<sup>13</sup>C NMR** (CDCl<sub>3</sub>, 125 MHz): δ 175.5, 144.0, 137.9, 135.2, 132.1, 130.9, 130.2, 129.7, 127.7, 89.1, 76.9, 74.4, 66.4, 50.2, 30.1, 21.6; **HRMS** (ESI) *m/z*: [M + H]<sup>+</sup> calcd for C<sub>21</sub>H<sub>19</sub>NO<sub>3</sub>SBr 444.0269, found 444.0262.

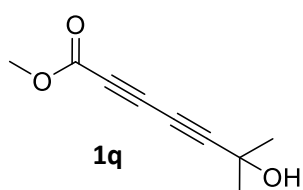

80 mg (76% yield), clear oil, purified by flash column chromatography (SiO<sub>2</sub>, EtOAc–hexanes, 1:10). **<sup>1</sup>H NMR** (CDCl<sub>3</sub>, 500 MHz): δ 3.78 (s, 3H), 3.72 (s, 1H), 1.55 (s, 6H); **<sup>13</sup>C NMR** (CDCl<sub>3</sub>, 125 MHz): δ 153.1, 100.2, 89.2, 70.6, 68.8, 65.5, 53.1, 30.7; **HRMS** (EI) *m/z*: [M]<sup>+</sup> calcd for C<sub>9</sub>H<sub>11</sub>O<sub>3</sub> 167.07083, found 167.07094.

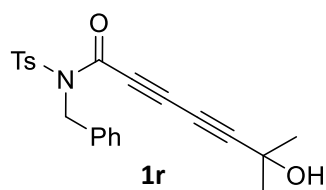

130 mg (77% yield), pale-yellow oil, purified by flash column chromatography (SiO<sub>2</sub>, EtOAc–hexanes, 1:10). **<sup>1</sup>H NMR** (CDCl<sub>3</sub>, 500 MHz): δ 7.55 (d, 2H, *J* = 8.4 Hz), 7.38–7.29 (m, 5H), 7.19 (d, 2H, *J* = 8.4 Hz), 5.17 (s, 2H), 2.38 (s, 3H), 1.53 (s, 6H); **<sup>13</sup>C NMR** (CDCl<sub>3</sub>, 125 MHz): δ 151.7, 145.4, 135.8, 135.3, 129.4, 128.8, 128.7, 128.3, 128.1, 92.5, 78.2, 69.1, 65.6, 65.0, 50.2, 30.7, 21.7; **HRMS** (ESI) *m/z*: [M + H]<sup>+</sup> calcd for C<sub>22</sub>H<sub>22</sub>NO<sub>4</sub>S 396.1270, found 396.1264.

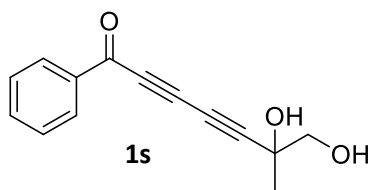

30 mg (80% yield), yellow oil, purified by flash column chromatography (SiO<sub>2</sub>, EtOAc–hexanes, 1:10). **<sup>1</sup>H NMR** (CDCl<sub>3</sub>, 500 MHz): δ 8.11 (d, 2H, *J* = 7.8 Hz), 7.64 (t, 1H, *J* = 7.4 Hz), 7.50 (t, 2H, *J* = 7.8 Hz), 3.78 (d, 1H, *J* = 10.6 Hz), 3.58 (d, 1H, *J* = 10.6 Hz), 2.93 (s, 1H), 2.21 (s, 1H), 1.54 (s, 3H); **<sup>13</sup>C NMR** (CDCl<sub>3</sub>, 125 MHz): δ 176.8, 136.3, 134.7, 129.7, 128.8, 89.0, 76.2, 74.9, 70.2, 69.3, 67.5, 24.8; **HRMS** (ESI) *m/z*: [M + H]<sup>+</sup> calcd for C<sub>14</sub>H<sub>13</sub>O<sub>3</sub> 229.0786, found 229.0786.

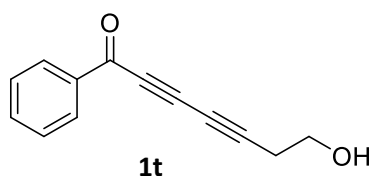

100 mg (82% yield), pale-yellow solid, purified by flash column chromatography (SiO<sub>2</sub>, EtOAc–hexanes, 1:10). **<sup>1</sup>H NMR** (CDCl<sub>3</sub>, 500 MHz): δ 8.10 (d, 2H, *J* = 8.4 Hz), 7.61 (t, 1H, *J* = 7.7 Hz), 7.48 (t, 2H, *J* = 7.7 Hz), 3.84 (t, 2H, *J* = 6.4 Hz), 2.69 (t, 2H, *J* = 6.4 Hz), 2.16 (s, 1H); **<sup>13</sup>C NMR** (CDCl<sub>3</sub>, 125 MHz): δ 177.1, 136.5, 134.5, 129.6, 128.7, 87.3, 77.9, 71.8, 65.5, 60.3, 24.1; **HRMS** (ESI) *m/z*: [M + H]<sup>+</sup> calcd for C<sub>13</sub>H<sub>11</sub>O<sub>2</sub> 199.0759, found 199.0758.

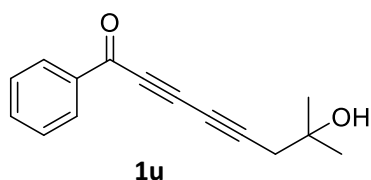

30 mg (81% yield), pale-yellow solid, purified by flash column chromatography (SiO<sub>2</sub>, EtOAc–hexanes, 1:10). **<sup>1</sup>H NMR** (CDCl<sub>3</sub>, 500 MHz): δ 8.07 (d, 2H, *J* = 8.3 Hz), 7.57 (t, 1H, *J* = 7.8 Hz), 7.44 (t, 2H, *J* = 7.8 Hz), 2.59 (s, 2H), 2.51 (s, 1H), 1.35 (s, 6H); **<sup>13</sup>C NMR** (CDCl<sub>3</sub>, 125 MHz): δ 177.2, 136.4, 134.5, 129.6, 128.7, 87.7, 78.2, 71.8, 70.6, 66.2, 35.2, 29.0; **HRMS** (ESI) *m/z*: [M + H]<sup>+</sup> calcd for C<sub>15</sub>H<sub>15</sub>O<sub>2</sub> 227.1072, found 227.1070.

## Characterization Data of Products

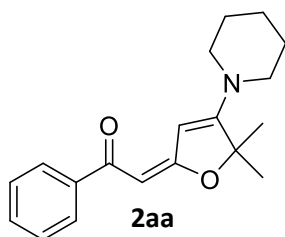

22 mg (78% yield), red oil, purified by flash column chromatography (SiO<sub>2</sub>, EtOAc–hexanes, 1:5). **<sup>1</sup>H NMR** (CDCl<sub>3</sub>, 500 MHz): δ 7.90 (d, 2H, *J* = 8.1 Hz), 7.50–7.24 (m, 3H), 6.53 (s, 1H), 5.96 (s, 1H), 3.40 (t, 4H, *J* = 5.4 Hz), 1.69–1.62 (m, 6H), 1.61 (s, 6H); **<sup>13</sup>C NMR** (CDCl<sub>3</sub>, 125 MHz): δ 188.1, 177.3, 171.0, 141.5, 130.4, 128.0, 127.2, 90.2, 87.2, 85.8, 49.7, 25.9, 25.6, 24.0; **HRMS** (ESI) *m/z*: [M + H]<sup>+</sup> calcd for C<sub>19</sub>H<sub>24</sub>NO<sub>2</sub> 298.1807, found 298.1802.

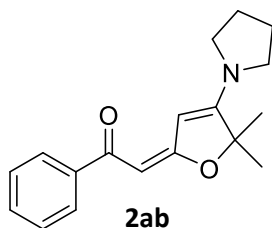

34 mg (86% yield), orange oil, purified by flash column chromatography (SiO<sub>2</sub>, EtOAc–hexanes, 1:5). **<sup>1</sup>H NMR** (CDCl<sub>3</sub>, 500 MHz): δ 7.91 (d, 2H, *J* = 6.0 Hz), 7.43–7.32 (m, 3H), 6.32 (s, 1H), 5.97 (s, 1H), 3.45 (t, 4H, *J* = 6.8 Hz), 2.01–1.96 (m, 4H), 1.61 (s, 6H); **<sup>13</sup>C NMR** (CDCl<sub>3</sub>, 125 MHz): δ 188.0, 177.5, 169.3, 141.5, 130.3, 128.0, 127.2, 90.6, 87.1, 85.7, 49.1, 25.4, 24.6; **HRMS** (ESI) *m/z*: [M + H]<sup>+</sup> calcd for C<sub>18</sub>H<sub>22</sub>NO<sub>2</sub> 284.1651, found 284.1650.

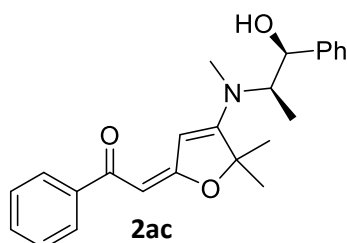

12 mg (72% yield), yellow oil, purified by flash column chromatography (SiO<sub>2</sub>, EtOAc–hexanes, 1:10). **<sup>1</sup>H NMR** (CDCl<sub>3</sub>, 500 MHz): δ 7.86 (d, 2H, *J* = 6.7 Hz), 7.41–7.29 (m, 7H), 7.29–7.26 (m, 1H), 6.49 (s, 1H), 5.90 (s, 1H), 4.89 (d, 1H, *J* = 6.1 Hz), 3.85 (p, 1H, *J* = 6.6 Hz), 3.00 (s, 3H), 1.73 (s, 1H), 1.43 (s, 3H), 1.38–1.34 (m, 6H); **<sup>13</sup>C NMR** (CDCl<sub>3</sub>, 125 MHz): δ 188.3, 177.1, 172.0, 141.7, 141.4, 130.4, 128.6, 128.1, 128.0, 127.2, 126.1, 90.8, 87.3, 86.0, 75.7, 61.1, 34.0, 25.4, 25.3, 13.2; **HRMS** (ESI) *m/z*: [M + H]<sup>+</sup> calcd for C<sub>24</sub>H<sub>28</sub>O<sub>3</sub>N 378.2069, found 378.2066.

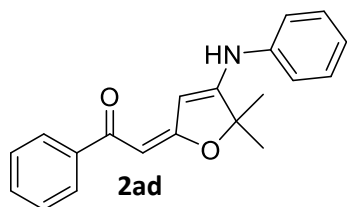

14 mg (40% yield), yellow oil, purified by flash column chromatography (SiO<sub>2</sub>, EtOAc–hexanes, 1:5). **<sup>1</sup>H NMR** (CDCl<sub>3</sub>, 500 MHz): δ 7.92 (d, 2H, *J* = 8.3 Hz), 7.44 (t, 1H, *J* = 7.2 Hz), 7.40 (t, 2H, *J* = 7.2 Hz), 7.34 (t, 2H, *J* = 8.0 Hz), 7.23 (d, 2H, *J* = 7.5 Hz), 7.14–7.07 (m, 2H), 6.49 (s, 1H), 6.19 (s, 1H), 1.61 (s, 6H); **<sup>13</sup>C NMR** (CDCl<sub>3</sub>, 125 MHz): δ 188.9, 177.8, 164.0, 140.9, 139.6, 130.9, 129.6, 128.2, 127.3, 124.4, 120.1, 91.8, 89.7, 86.6, 25.4; **HRMS** (ESI) *m/z*: [M + H]<sup>+</sup> calcd for C<sub>20</sub>H<sub>20</sub>NO<sub>2</sub> 306.1494, found 306.1489.

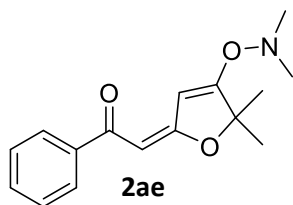

17 mg (78% yield), yellow oil, purified by flash column chromatography (SiO<sub>2</sub>, EtOAc–hexanes, 1:10). **<sup>1</sup>H NMR** (CDCl<sub>3</sub>, 500 MHz): δ 7.91 (d, 2H, *J* = 6.8 Hz), 7.47–7.36 (m, 3H), 6.54 (s, 1H), 6.14 (s, 1H), 3.70 (s, 3H), 3.16 (s, 3H), 1.61 (s, 6H); **<sup>13</sup>C NMR** (CDCl<sub>3</sub>, 125 MHz): δ 189.1, 175.8, 170.6, 140.8, 130.9, 128.2, 127.4, 93.6, 90.0, 88.0, 60.8, 39.0, 25.6; **HRMS** (ESI) *m/z*: [M + H]<sup>+</sup> calcd for C<sub>16</sub>H<sub>20</sub>O<sub>3</sub>N 274.1443, found 274.1443.

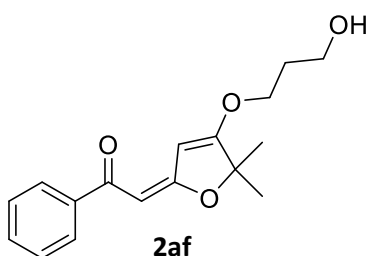

38 mg (78% yield), orange oil, purified by flash column chromatography (SiO<sub>2</sub>, EtOAc–hexanes, 1:10). **<sup>1</sup>H NMR** (CDCl<sub>3</sub>, 500 MHz): δ 7.90 (d, 2H, *J* = 7.6 Hz), 7.46 (t, 1H, *J* = 7.2 Hz), 7.41 (t, 2H, *J* = 7.6 Hz), 6.72 (s, 1H), 6.23 (s, 1H), 4.25 (t, 2H, *J* = 6.3 Hz), 3.79 (t, 2H, *J* = 6.3 Hz), 2.08–2.00 (m, 2H), 1.46 (s, 6H); **<sup>13</sup>C NMR** (CDCl<sub>3</sub>, 125 MHz): δ 189.6, 179.7, 176.3, 140.5, 131.3, 128.3, 127.4, 92.5, 91.7, 85.6, 69.7, 58.9, 31.5, 24.4; **HRMS** (ESI) *m/z*: [M + H]<sup>+</sup> calcd for C<sub>17</sub>H<sub>21</sub>O<sub>4</sub> 289.1440, found 289.1438.



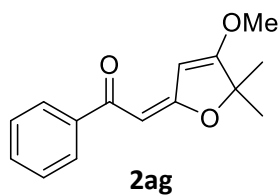

12 mg (72% yield), yellow oil, purified by flash column chromatography (SiO<sub>2</sub>, EtOAc–hexanes, 1:10). **<sup>1</sup>H NMR** (CDCl<sub>3</sub>, 500 MHz): δ 7.92 (d, 2H, *J* = 7.0 Hz), 7.47 (t, 1H, *J* = 7.2 Hz), 7.42 (t, 2H, *J* = 7.2 Hz), 6.74 (s, 1H), 6.25 (s, 1H), 3.93 (s, 3H), 1.47 (s, 6H); **<sup>13</sup>C NMR** (CDCl<sub>3</sub>, 125 MHz): δ 189.5, 180.6, 176.0, 140.5, 131.3, 128.2, 127.5, 92.3, 91.7, 85.5, 59.5, 24.4; **HRMS** (ESI) *m/z*: [M + H]<sup>+</sup> calcd for C<sub>15</sub>H<sub>17</sub>O<sub>3</sub> 245.1178, found 245.1178.

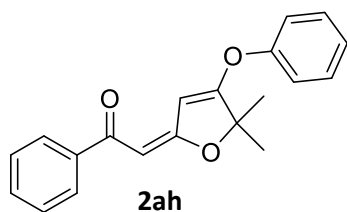

10 mg (20% yield), yellow oil, purified by flash column chromatography (SiO<sub>2</sub>, EtOAc–hexanes, 1:10). **<sup>1</sup>H NMR** (CDCl<sub>3</sub>, 500 MHz): δ 7.87 (d, 2H, *J* = 7.1 Hz), 7.49–7.36 (m, 5H), 7.29 (t, 1H, *J* = 7.5 Hz), 7.20–7.17 (m, 2H), 6.50 (s, 1H), 6.28 (s, 1H), 1.65 (s, 6H); **<sup>13</sup>C NMR** (CDCl<sub>3</sub>, 125 MHz): δ 189.3, 178.7, 175.3, 154.7, 140.2, 131.4, 130.3, 128.3, 127.5, 126.5, 120.1, 95.3, 92.5, 85.6, 24.5; **HRMS** (ESI) *m/z*: [M + H]<sup>+</sup> calcd for C<sub>20</sub>H<sub>19</sub>O<sub>3</sub> 307.1334, found 307.1335.

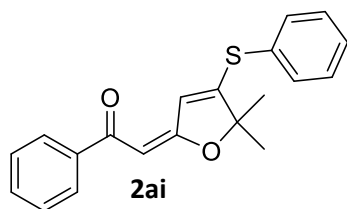

40 mg (76% yield), orange oil, purified by flash column chromatography (SiO<sub>2</sub>, EtOAc–hexanes, 1:10). **<sup>1</sup>H NMR** (CDCl<sub>3</sub>, 500 MHz): δ 7.87–7.83 (m, 2H), 7.63–7.58 (m, 2H), 7.50–7.46 (m, 3H), 7.45–7.43 (m, 1H), 7.41–7.36 (m, 2H), 6.84 (s, 1H), 6.22 (s, 1H), 1.61 (s, 6H); **<sup>13</sup>C NMR** (CDCl<sub>3</sub>, 125 MHz): δ 189.3, 173.5, 168.1, 140.2, 134.6, 131.5, 130.3, 130.2, 128.3, 128.2, 127.5, 114.4, 91.7, 91.1, 26.5; **HRMS** (ESI) *m/z*: [M + H]<sup>+</sup> calcd for C<sub>20</sub>H<sub>19</sub>O<sub>2</sub>S 323.1106, found 323.1106.

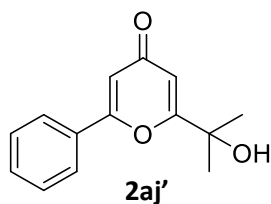

48–13 mg, (84–42% yield), clear oil, purified by flash column chromatography (SiO<sub>2</sub>, EtOAc–hexanes, 1:10). **<sup>1</sup>H NMR** (CDCl<sub>3</sub>, 500 MHz): δ 7.72 (d, 2H, *J* = 6.3 Hz), 7.51–7.44 (m, 3H), 6.68 (d, 1H, *J* = 2.2 Hz), 6.63 (d, 1H, *J* = 2.2 Hz), 4.01 (s, 1H), 1.63 (s, 6H); **<sup>13</sup>C NMR** (CDCl<sub>3</sub>, 125 MHz): δ 181.1, 174.0, 163.6, 131.5, 131.2, 129.1, 125.8, 110.7, 110.2, 71.1, 28.4; **HRMS** (ESI) *m/z*: [M + H]<sup>+</sup> calcd for C<sub>14</sub>H<sub>15</sub>O<sub>3</sub> 231.1021, found 231.1024.

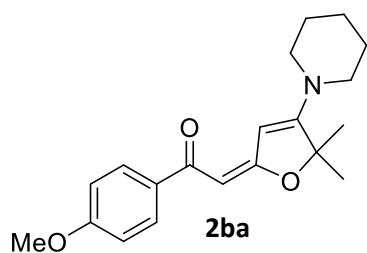

20 mg (68% yield), red oil, purified by flash column chromatography (SiO<sub>2</sub>, EtOAc–hexanes, 1:5). **<sup>1</sup>H NMR** (CDCl<sub>3</sub>, 500 MHz): δ 7.91 (d, 2H, *J* = 8.9 Hz), 6.89 (d, 2H, *J* = 8.9 Hz), 6.52 (s, 1H), 5.95 (s, 1H), 3.84 (s, 3H), 3.40 (s, 4H), 1.72–1.63 (m, 6H), 1.62 (s, 6H); **<sup>13</sup>C NMR** (CDCl<sub>3</sub>, 125 MHz): δ 187.0, 176.8, 170.6, 161.6, 134.1, 129.1, 113.2, 90.3, 86.9, 85.8, 55.3, 49.6, 25.9, 25.7, 24.0; **HRMS** (ESI) *m/z*: [M + H]<sup>+</sup> calcd for C<sub>20</sub>H<sub>26</sub>NO<sub>3</sub> 328.1913, found 328.1914.

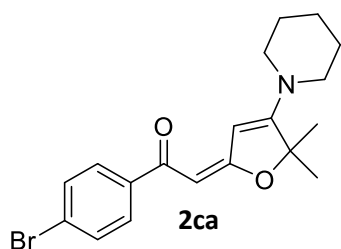

30 mg (73% yield), yellow solid, purified by flash column chromatography (SiO<sub>2</sub>, EtOAc–hexanes, 1:5). **<sup>1</sup>H NMR** (CDCl<sub>3</sub>, 500 MHz): δ 7.77 (d, 2H, *J* = 8.4 Hz), 7.50 (d, 2H, *J* = 8.4 Hz), 6.51 (s, 1H), 5.89 (s, 1H), 3.54–3.27 (m, 4H), 1.83–1.61 (m, 6H), 1.61 (s, 6H); **<sup>13</sup>C NMR** (CDCl<sub>3</sub>, 125 MHz): δ 186.6, 177.7, 171.3, 140.4, 131.2, 128.8, 124.9, 90.1, 86.8, 85.9, 49.7, 25.9, 25.6, 24.0; **HRMS** (ESI) *m/z*: [M + H]<sup>+</sup> calcd for C<sub>19</sub>H<sub>23</sub>BrNO<sub>2</sub> 376.0912, found 376.0909.

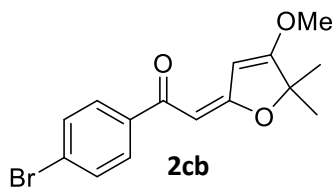

43 mg (85% yield), off-white solid, purified by flash column chromatography (SiO<sub>2</sub>, EtOAc–hexanes, 1:5). **<sup>1</sup>H NMR** (CDCl<sub>3</sub>, 500 MHz): δ 7.78 (d, 2H, *J* = 8.5 Hz), 7.54 (d, 2H, *J* = 8.5 Hz), 6.71 (s, 1H), 6.17 (s, 1H), 3.93 (s, 3H), 1.46 (s, 6H); **<sup>13</sup>C NMR** (CDCl<sub>3</sub>, 125 MHz): δ 188.2, 181.0, 176.5, 139.3, 131.5, 129.1, 126.0, 92.3, 91.3, 85.7, 59.5, 24.4; **HRMS** (ESI) *m/z*: [M + H]<sup>+</sup> calcd for C<sub>15</sub>H<sub>16</sub>BrO<sub>3</sub> 323.0283, found 323.0284.

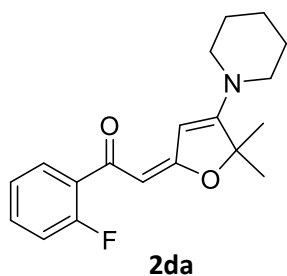

38 mg (76% yield), yellow solid, purified by flash column chromatography (SiO<sub>2</sub>, EtOAc–hexanes, 1:10). **<sup>1</sup>H NMR** (CDCl<sub>3</sub>, 500 MHz): δ 7.93–7.62 (m, 1H), 7.35–7.27 (m, 1H), 7.18–7.09 (m, 1H), 7.05–6.99 (m, 1H), 6.50 (s, 1H), 5.84 (s, 1H), 3.44–3.35 (m, 4H), 1.73–1.61 (m, 6H), 1.60 (s, 6H); **<sup>13</sup>C NMR** (CDCl<sub>3</sub>, 125 MHz): δ 184.9, 177.4, 171.5, 160.5 (d, *J* = 250.6 Hz), 131.2 (d, *J* = 8.8 Hz), 130.5, 130.4 (d, *J* = 3.2 Hz), 123.8 (d, *J* = 3.7 Hz), 116.0 (d, *J* = 24.0 Hz), 91.4 (d, *J* = 7.9 Hz), 90.4, 85.9, 49.7, 25.9, 25.5, 24.0; **HRMS** (ESI) *m/z*: [M + H]<sup>+</sup> calcd for C<sub>19</sub>H<sub>23</sub>FNO<sub>2</sub> 316.1713, found 316.1711.

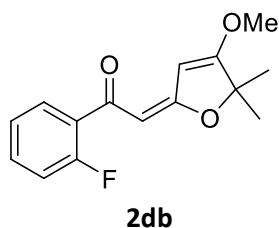

38 mg (77% yield), pale-yellow solid, purified by flash column chromatography (SiO<sub>2</sub>, EtOAc–hexanes, 1:10). **<sup>1</sup>H NMR** (CDCl<sub>3</sub>, 500 MHz): δ 7.81–7.74 (m, 1H), 7.42–7.34 (m, 1H), 7.21–7.13 (m, 1H), 7.10–7.03 (m, 1H), 6.70 (s, 1H), 6.13 (s, 1H), 3.93 (s, 3H), 1.45 (s, 6H); **<sup>13</sup>C NMR** (CDCl<sub>3</sub>, 125 MHz): δ 186.9, 181.1, 176.2, 160.7 (d, *J* = 252.0 Hz), 132.2 (d, *J* = 8.3 Hz), 130.4 (d, *J* = 3.2 Hz), 129.5 (d, *J* = 13.4 Hz), 124.1 (d, *J* = 3.2 Hz), 116.3 (d, *J* = 24.0 Hz), 95.9 (d, *J* = 7.4 Hz), 92.6, 85.7, 59.5, 24.4; **HRMS** (ESI) *m/z*: [M + H]<sup>+</sup> calcd for C<sub>15</sub>H<sub>16</sub>FO<sub>3</sub> 263.1083, found 263.1085.

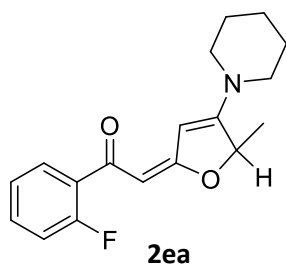

28 mg (81% yield), yellow oil, purified by flash column chromatography (SiO<sub>2</sub>, EtOAc–hexanes, 1:5). **<sup>1</sup>H NMR** (CDCl<sub>3</sub>, 500 MHz): δ 7.84–7.74 (m, 1H), 7.36–7.29 (m, 1H), 7.18–7.10 (m, 1H), 7.07–6.98 (m, 1H), 6.54 (s, 1H), 5.91 (s, 1H), 5.10 (q, 1H, *J* = 6.4 Hz), 3.30 (t, 4H, *J* = 4.4 Hz), 1.71–1.58 (m, 6H), 1.51 (d, 3H, *J* = 6.4 Hz); **<sup>13</sup>C NMR** (CDCl<sub>3</sub>, 125 MHz): δ 185.0, 179.6, 169.9, 161.5, 159.5, 131.3 (d, *J* = 8.3 Hz), 130.4 (d, *J* = 3.7 Hz), 123.9 (d, *J* = 3.7 Hz), 116.0 (d, *J* = 23.6 Hz), 92.0 (d, *J* = 7.4 Hz), 90.7, 78.2, 49.8, 25.5, 23.8, 19.9; **HRMS** (ESI) *m/z*: [M + H]<sup>+</sup> calcd for C<sub>18</sub>H<sub>21</sub>O<sub>2</sub>NF 302.1556, found 302.1556.

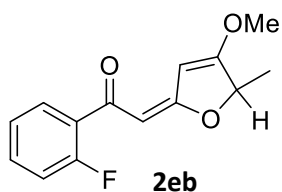

6 mg (24% yield), yellow oil, purified by flash column chromatography (SiO<sub>2</sub>, EtOAc–hexanes, 1:5). **<sup>1</sup>H NMR** (CDCl<sub>3</sub>, 500 MHz): δ 7.82–7.74 (m, 1H), 7.44–7.36 (m, 1H), 7.22–7.15 (m, 1H), 7.11–7.04 (m, 1H), 6.79 (s, 1H), 6.17 (s, 1H), 4.97 (q, 1H, *J* = 7.0 Hz), 3.94 (s, 3H), 1.46 (d, 3H, *J* = 7.0 Hz); **<sup>13</sup>C NMR** (CDCl<sub>3</sub>, 125 MHz): δ 186.9, 178.5, 177.5, 160.7 (d, *J* = 252.0 Hz), 132.3 (d, *J* = 8.8 Hz), 131.1, 130.4, 124.1, 116.3 (d, *J* = 24.0 Hz), 102.1 (d, *J* = 22.2 Hz), 95.9, 94.2, 59.4 (d, *J* = 7.9 Hz), 17.9; **HRMS** (EI) *m/z*: [M]<sup>+</sup> calcd for C<sub>14</sub>H<sub>14</sub>O<sub>3</sub>F 248.08488, found 248.08507.

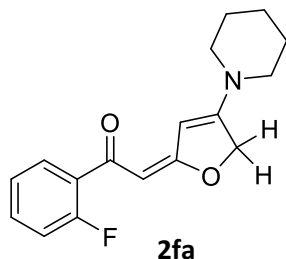

25 mg (77% yield), yellow oil, purified by flash column chromatography (SiO<sub>2</sub>, EtOAc–hexanes, 1:5). **<sup>1</sup>H NMR** (CDCl<sub>3</sub>, 500 MHz): δ 7.83–7.76 (m, 1H), 7.36–7.30 (m, 1H), 7.20–7.12 (m, 1H), 7.07–7.00 (m, 1H), 6.54 (s, 1H), 5.93 (s, 1H), 4.89 (s, 2H), 3.27 (s, 4H), 1.71–1.60 (m, 6H); **<sup>13</sup>C NMR** (CDCl<sub>3</sub>, 125 MHz): δ 184.7, 181.6, 165.4, 161.5, 159.5, 131.4 (d, *J* = 8.3 Hz), 130.4 (d, *J* = 3.7 Hz), 123.9 (d, *J* = 3.7 Hz), 116.1 (d, *J* = 24.0 Hz), 91.9 (d, *J* = 7.4 Hz), 90.4, 71.3, 49.5, 25.4, 23.7; **HRMS** (ESI) *m/z*: [M + H]<sup>+</sup> calcd for C<sub>17</sub>H<sub>19</sub>O<sub>2</sub>NF 288.1400, found 288.1402.

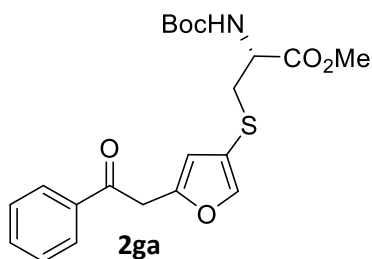

25 mg (50% yield), yellow oil, purified by flash column chromatography (SiO<sub>2</sub>, EtOAc–hexanes, 1:5). **<sup>1</sup>H NMR** (CDCl<sub>3</sub>, 500 MHz): δ 7.99 (d, 2H, *J* = 7.8 Hz), 7.59 (t, 1H, *J* = 7.5 Hz), 7.48 (t, 2H, *J* = 7.8 Hz), 7.39 (s, 1H), 6.31 (s, 1H), 5.35 (d, 1H, *J* = 8.6 Hz), 4.53–4.46 (m, 1H), 4.27 (s, 2H), 3.58 (s, 3H), 3.15–3.04 (m, 2H), 1.44 (s, 9H); **<sup>13</sup>C NMR** (CDCl<sub>3</sub>, 125 MHz): δ 194.3, 171.1, 155.1, 149.6, 144.5, 136.1, 133.6, 128.8, 128.6, 115.8, 112.7, 80.2, 52.9, 52.3, 38.3, 38.0, 28.3; **HRMS** (ESI) *m/z*: [M + H]<sup>+</sup> calcd for C<sub>21</sub>H<sub>26</sub>O<sub>6</sub>NS 420.1300, found 420.1302.

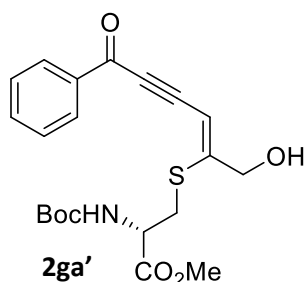

25 mg (12% yield), yellow oil, purified by flash column chromatography (SiO<sub>2</sub>, EtOAc–hexanes, 1:5). **<sup>1</sup>H NMR** (CDCl<sub>3</sub>, 500 MHz): δ 8.24 (d, 2H, *J* = 7.7 Hz), 7.62 (t, 1H, *J* = 7.4 Hz), 7.52 (t, 2H, *J* = 7.7 Hz), 6.17 (s, 1H), 5.45 (d, 1H, *J* = 6.9 Hz), 4.72–4.53 (m, 1H), 4.39 (d, 2H, *J* = 6.2 Hz), 3.74 (s, 3H), 3.53 (dd, 1H, *J* = 14.3, 5.2 Hz), 3.36 (dd, 1H, *J* = 14.3, 5.2 Hz), 2.52 (s, 1H), 1.44 (s, 9H); **<sup>13</sup>C NMR** (CDCl<sub>3</sub>, 125 MHz): δ 177.8, 170.9, 156.2, 155.3, 136.9, 134.1, 129.8, 128.7, 106.7, 94.7, 89.0, 80.7, 64.9, 53.6, 52.9, 33.8, 28.3; **HRMS** (ESI) *m/z*: [M + H]<sup>+</sup> calcd for C<sub>21</sub>H<sub>26</sub>O<sub>6</sub>NS 420.1300, found 420.1295.

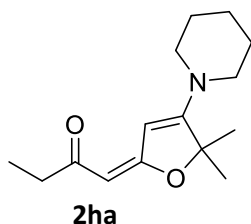

13 mg (23% yield), yellow oil, purified by flash column chromatography (SiO<sub>2</sub>, EtOAc–hexanes, 1:10). **<sup>1</sup>H NMR** (CDCl<sub>3</sub>, 500 MHz): δ 6.31 (s, 1H), 5.25 (s, 1H), 3.34 (t, 4H, *J* = 5.5 Hz), 2.32 (q, 2H, *J* = 7.5 Hz), 1.68–1.60 (m, 6H), 1.56 (s, 6H), 1.09 (t, 3H, *J* = 7.5 Hz); **<sup>13</sup>C NMR** (CDCl<sub>3</sub>, 125 MHz): δ 199.0, 175.3, 169.9, 89.8, 89.2, 85.5, 49.5, 36.2, 25.8, 25.7, 24.0, 9.9; **HRMS** (ESI) *m/z*: [M + H]<sup>+</sup> calcd for C<sub>15</sub>H<sub>24</sub>O<sub>2</sub>N 250.1807, found 250.1806.

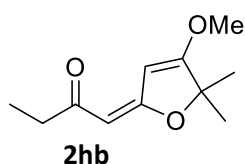

12 mg (48% yield), yellow oil, purified by flash column chromatography (SiO<sub>2</sub>, EtOAc–hexanes, 1:10). **<sup>1</sup>H NMR** (CDCl<sub>3</sub>, 500 MHz): δ 6.54 (s, 1H), 5.51 (s, 1H), 3.88 (s, 3H), 2.38 (q, 2H, *J* = 7.4 Hz), 1.41 (s, 6H), 1.09 (t, 3H, *J* = 7.5 Hz); **<sup>13</sup>C NMR** (CDCl<sub>3</sub>, 125 MHz): δ 200.3, 179.5, 173.6, 94.0, 91.9, 85.1, 59.3, 36.7, 24.4, 9.2; **HRMS** (ESI) *m/z*: [M + H]<sup>+</sup> calcd for C<sub>11</sub>H<sub>17</sub>O<sub>3</sub> 197.1178, found 197.1180.

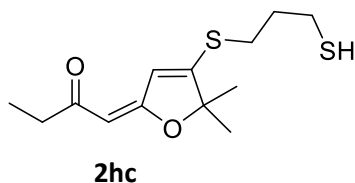

5 mg (10% yield), orange oil, purified by flash column chromatography (SiO<sub>2</sub>, EtOAc–hexanes, 1:10). **<sup>1</sup>H NMR** (CDCl<sub>3</sub>, 500 MHz): δ 7.11 (s, 1H), 5.51 (s, 1H), 3.08–3.02 (m, 2H), 2.66 (q, 2H, *J* = 7.2 Hz), 2.39–2.37 (m, 2H), 2.09–2.00 (m, 2H), 1.44 (s, 6H), 1.09 (t, 3H, *J* = 7.2 Hz); **<sup>13</sup>C NMR** (CDCl<sub>3</sub>, 125 MHz): δ 200.1, 171.5, 152.5, 112.7, 93.5, 91.1, 36.7, 31.8, 30.9, 25.3, 23.4, 9.0; **HRMS** (ESI) *m/z*: [M + H]<sup>+</sup> calcd for C<sub>13</sub>H<sub>21</sub>O<sub>2</sub>S<sub>2</sub> 273.0983, found 273.0980.

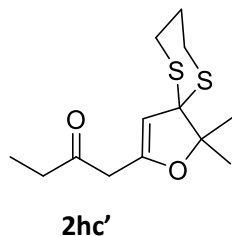

10 mg (20% yield), orange oil, purified by flash column chromatography (SiO<sub>2</sub>, EtOAc–hexanes, 1:10). **<sup>1</sup>H NMR** (CDCl<sub>3</sub>, 500 MHz): δ 5.77 (s, 1H), 3.94 (s, 2H), 3.13–3.07 (m, 2H), 2.83 (q, 2H, *J* = 7.6 Hz), 2.45–2.40 (m, 2H), 2.18–2.09 (m, 1H), 1.93–1.81 (m, 1H), 1.49 (s, 6H), 1.07 (t, *J* = 7.6 Hz, 3H); **<sup>13</sup>C NMR** (CDCl<sub>3</sub>, 125 MHz): δ 201.0, 171.2, 99.1, 90.4, 59.1, 47.0, 36.9, 28.1, 26.4, 23.5, 8.4; **HRMS** (ESI) *m/z*: [M + H]<sup>+</sup> calcd for C<sub>13</sub>H<sub>21</sub>O<sub>2</sub>S<sub>2</sub> 273.0983, found 273.0980.

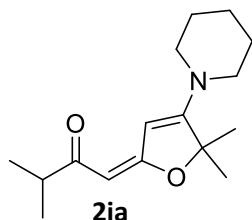

15 mg (32% yield), yellow oil, purified by flash column chromatography (SiO<sub>2</sub>, EtOAc–hexanes, 1:10). **<sup>1</sup>H NMR** (CDCl<sub>3</sub>, 500 MHz): δ 6.34 (s, 1H), 5.27 (s, 1H), 3.34 (t, 4H, *J* = 5.5 Hz), 2.49 (h, 1H, *J* = 6.8 Hz), 1.71–1.58 (m, 6H), 1.57 (s, 6H), 1.09 (d, 6H, *J* = 6.8 Hz); **<sup>13</sup>C NMR** (CDCl<sub>3</sub>, 125 MHz): δ 202.5, 175.8, 169.9, 90.0, 88.3, 85.5, 49.5, 40.7, 25.8, 25.7, 24.0, 19.7; **HRMS** (ESI) *m/z*: [M + H]<sup>+</sup> calcd for C<sub>16</sub>H<sub>26</sub>O<sub>2</sub>N 264.1858, found 264.1852.

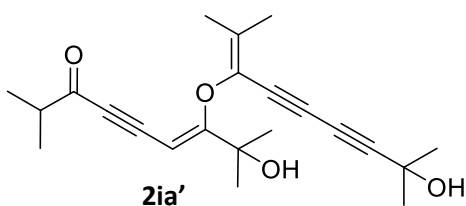

20 mg (18% yield), yellow oil, purified by flash column chromatography (SiO<sub>2</sub>, EtOAc–hexanes, 1:10). **<sup>1</sup>H NMR** (CDCl<sub>3</sub>, 500 MHz): δ 5.49 (s, 1H), 2.61 (hept, 1H, *J* = 6.8 Hz), 2.17 (s, 1H), 2.03 (s, 1H), 1.93 (s, 3H), 1.81 (s, 3H), 1.54 (s, 6H), 1.43 (s, 6H), 1.16 (d, 6H, *J* = 6.8 Hz); **<sup>13</sup>C NMR** (CDCl<sub>3</sub>, 125 MHz): δ 192.0, 172.1, 135.2, 129.7, 92.3, 88.4, 87.5, 81.8, 77.6, 72.6, 71.8, 66.7, 65.7, 42.8, 31.0, 28.0, 20.3, 18.1, 17.9; **HRMS** (ESI) *m/z*: [M + H]<sup>+</sup> calcd for C<sub>22</sub>H<sub>29</sub>O<sub>4</sub> 357.2060, found 357.2060.

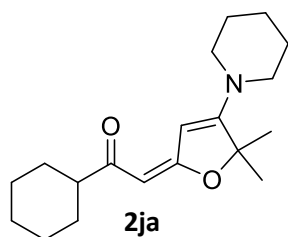

19 mg (34% yield), yellow oil, purified by flash column chromatography (SiO<sub>2</sub>, EtOAc–hexanes, 1:10). **<sup>1</sup>H NMR** (CDCl<sub>3</sub>, 500 MHz): δ 6.33 (s, 1H), 5.26 (s, 1H), 3.34 (t, 4H, *J* = 5.4 Hz), 2.19 (tt, 1H, *J* = 11.6, 3.4 Hz), 1.85–1.79 (m, 2H), 1.78–1.71 (m, 2H), 1.69–1.57 (m, 6H), 1.56 (s, 6H), 1.44–1.33 (m, 2H), 1.31–1.14 (m, 4H); **<sup>13</sup>C NMR** (CDCl<sub>3</sub>, 125 MHz): δ 201.7, 175.7, 169.8, 90.0, 88.6, 85.5, 51.3, 49.5, 29.8, 26.2, 25.8, 25.7, 24.0; **HRMS** (ESI) *m/z*: [M + H]<sup>+</sup> calcd for C<sub>19</sub>H<sub>30</sub>NO<sub>2</sub> 304.2277, found 304.2275.

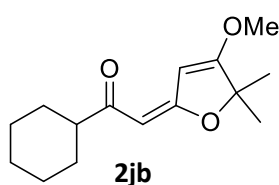

19 mg (64% yield), pale-yellow oil, purified by flash column chromatography (SiO<sub>2</sub>, EtOAc–hexanes, 1:10). **<sup>1</sup>H NMR** (CDCl<sub>3</sub>, 500 MHz): δ 6.55 (s, 1H), 5.53 (s, 1H), 3.86 (s, 3H), 2.25 (tt, 1H, *J* = 11.5, 3.4 Hz), 1.87–1.79 (m, 2H), 1.80–1.73 (m, 2H), 1.41 (s, 6H), 1.40–1.33 (m, 2H), 1.32–1.15 (m, 4H); **<sup>13</sup>C NMR** (CDCl<sub>3</sub>, 125 MHz): δ 203.0, 179.5, 174.2, 93.4, 92.0, 85.0, 59.2, 51.5, 29.4, 26.1, 26.0, 24.4; **HRMS** (ESI) *m/z*: [M + H]<sup>+</sup> calcd for C<sub>15</sub>H<sub>23</sub>O<sub>3</sub> 251.1647, found 251.1653.

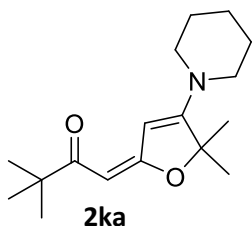

18 mg (76% yield), yellow oil, purified by flash column chromatography (SiO<sub>2</sub>, EtOAc–hexanes, 1:10). **<sup>1</sup>H NMR** (CDCl<sub>3</sub>, 500 MHz): δ 6.36 (s, 1H), 5.47 (s, 1H), 3.34 (t, 4H, *J* = 5.4 Hz), 1.70–1.58 (m, 6H), 1.57 (s, 6H), 1.14 (s, 9H); **<sup>13</sup>C NMR** (CDCl<sub>3</sub>, 125 MHz): δ 204.1, 176.2, 169.8, 90.0, 85.8, 85.4, 49.5, 42.3, 27.8, 25.8, 25.7, 24.0; **HRMS** (ESI) *m/z*: [M + H]<sup>+</sup> calcd for C<sub>17</sub>H<sub>28</sub>NO<sub>2</sub> 278.2120, found 278.2120.

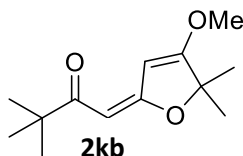

14 mg (70% yield), pale-yellow oil, purified by flash column chromatography (SiO<sub>2</sub>, EtOAc–hexanes, 1:10). **<sup>1</sup>H NMR** (CDCl<sub>3</sub>, 500 MHz): δ 6.58 (s, 1H), 5.74 (s, 1H), 3.86 (s, 3H), 1.42 (s, 6H), 1.15 (s, 9H); **<sup>13</sup>C NMR** (CDCl<sub>3</sub>, 125 MHz): δ 205.2, 179.4, 174.7, 92.0, 90.6, 85.0, 59.2, 42.8, 27.3, 24.4; **HRMS** (ESI) *m/z*: [M + H]<sup>+</sup> calcd for C<sub>13</sub>H<sub>21</sub>O<sub>3</sub> 225.1491, found 225.1494.

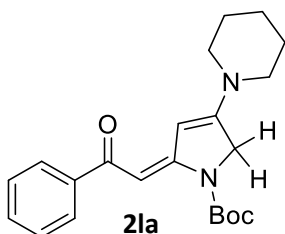

20 mg (81% yield), orange oil, purified by flash column chromatography (SiO<sub>2</sub>, EtOAc–hexanes, 1:5). **<sup>1</sup>H NMR** (CDCl<sub>3</sub>, 500 MHz): δ 7.96 (d, 2H, *J* = 8.0 Hz), 7.43–7.36 (m, 3H), 7.26 (s, 1H), 6.97 (s, 1H), 4.38 (s, 2H), 3.29 (t, 4H, *J* = 4.9 Hz), 1.69–1.61 (m, 6H), 1.59 (s, 9H); **<sup>13</sup>C NMR** (CDCl<sub>3</sub>, 125 MHz): δ 188.9, 161.9, 158.6, 158.6, 142.0, 130.5, 128.0, 127.5, 93.7, 92.0, 82.4, 52.3, 48.7, 29.7, 28.4, 25.4; **HRMS** (ESI) *m/z*: [M + H]<sup>+</sup> calcd for C<sub>22</sub>H<sub>29</sub>N<sub>2</sub>O<sub>3</sub> 369.2178, found 369.2175.

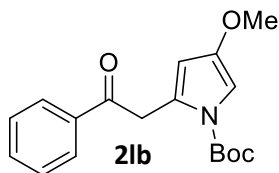

12 mg (45% yield), yellow oil, purified by flash column chromatography (SiO<sub>2</sub>, EtOAc–hexanes, 1:10). **<sup>1</sup>H NMR** (CDCl<sub>3</sub>, 500 MHz): δ 7.99 (d, 2H, *J* = 7.7 Hz), 7.57 (t, 1H, *J* = 7.4 Hz), 7.47 (t, 2H, *J* = 7.7 Hz), 6.72 (s, 1H), 5.87 (s, 1H), 4.49 (s, 2H), 3.72 (s, 3H), 1.45 (s, 9H); **<sup>13</sup>C NMR** (CDCl<sub>3</sub>, 125 MHz): δ 196.1, 149.1, 148.9, 136.9, 133.0, 129.6, 128.6, 128.2, 107.0, 100.9, 83.3, 57.4, 39.4, 28.0; **HRMS** (ESI) *m/z*: [M + H]<sup>+</sup> calcd for C<sub>18</sub>H<sub>22</sub>O<sub>4</sub>N 316.1368, found 316.1366.

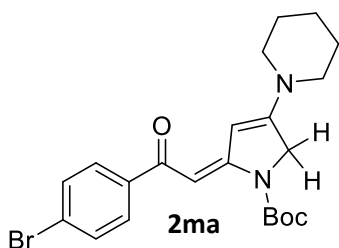

30 mg (86% yield), orange solid, purified by flash column chromatography (SiO<sub>2</sub>, EtOAc–hexanes, 1:10). **<sup>1</sup>H NMR** (CDCl<sub>3</sub>, 500 MHz): δ 7.82 (d, 2H, *J* = 8.5 Hz), 7.51 (d, 2H, *J* = 8.5 Hz), 7.21 (s, 1H), 6.94 (s, 1H), 4.37 (s, 2H), 3.29 (t, 4H, *J* = 4.9 Hz), 1.69–1.60 (m, 6H), 1.57 (s, 9H); **<sup>13</sup>C NMR** (CDCl<sub>3</sub>, 125 MHz): δ 187.3, 162.5, 162.5, 159.0, 140.8, 131.2, 129.1, 125.0, 93.6, 91.3, 82.5, 52.3, 48.8, 28.4, 25.4, 23.8; **HRMS** (ESI) *m/z*: [M + H]<sup>+</sup> calcd for C<sub>22</sub>H<sub>28</sub>N<sub>2</sub>O<sub>3</sub>Br 447.1283, found 447.1279.

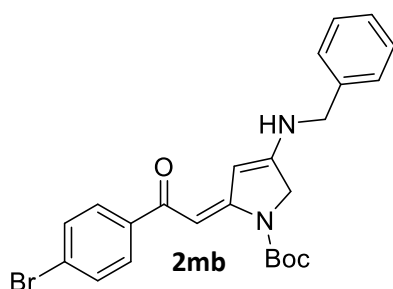

11 mg (44% yield), yellow solid, purified by flash column chromatography (SiO<sub>2</sub>, EtOAc–hexanes, 1:10). **<sup>1</sup>H NMR** (CDCl<sub>3</sub>, 500 MHz): δ 7.83 (d, 2H, *J* = 8.5 Hz), 7.53 (d, 2H, *J* = 8.5 Hz), 7.39–7.35 (m, 2H), 7.34–7.30 (m, 3H), 7.00 (s, 1H), 4.73 (s, 1H), 4.39 (s, 2H), 4.38 (s, 2H), 1.56 (s, 9H); **<sup>13</sup>C NMR** (CDCl<sub>3</sub>, 125 MHz): δ 188.1, 161.8, 159.0, 156.8, 140.4, 136.8, 131.3, 129.2, 129.0, 128.2, 127.8, 125.4, 94.1, 92.8, 82.5, 53.0, 49.1, 28.3; **HRMS** (ESI) *m/z*: [M + H]<sup>+</sup> calcd for C<sub>24</sub>H<sub>26</sub>O<sub>3</sub>N<sub>2</sub>Br 469.1127, found 469.1123.

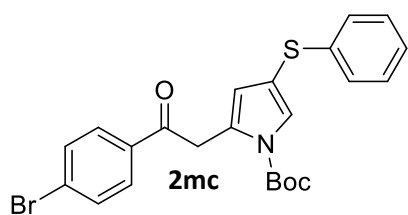

20 mg (63% yield), yellow solid, purified by flash column chromatography (SiO<sub>2</sub>, EtOAc–hexanes, 1:10). **<sup>1</sup>H NMR** (CDCl<sub>3</sub>, 500 MHz): δ 7.86 (d, 2H, *J* = 8.6 Hz), 7.62 (d, 2H, *J* = 8.6 Hz), 7.47 (s, 1H), 7.27–7.21 (m, 4H), 7.14–7.10 (m, 1H), 6.13 (s, 1H), 4.50 (s, 2H), 1.48 (t, 9H, *J* = 1.7 Hz); **<sup>13</sup>C NMR** (CDCl<sub>3</sub>, 125 MHz): δ 195.0, 148.6, 138.3, 135.5, 132.0, 129.7, 129.1, 128.9, 128.2, 127.0, 126.6, 125.4, 118.9, 112.7, 84.5, 39.0, 27.9; **HRMS** (ESI) *m/z*: [M + H]<sup>+</sup> calcd for C<sub>23</sub>H<sub>23</sub>NO<sub>3</sub>SBr 472.0582, found 472.0595.

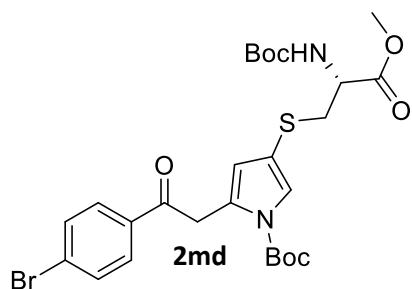

45 mg (72% yield), yellow solid, purified by flash column chromatography (SiO<sub>2</sub>, EtOAc–hexanes, 1:10). **<sup>1</sup>H NMR** (CDCl<sub>3</sub>, 500 MHz): δ 7.84 (d, 2H, *J* = 7.1 Hz), 7.62 (d, 2H, *J* = 7.1 Hz), 7.30 (s, 1H), 6.11 (s, 1H), 5.35 (s, 1H), 4.57–4.35 (m, 3H), 3.66 (s, 3H), 3.13 (s, 2H), 1.47 (s, 9H), 1.44 (s, 9H); **<sup>13</sup>C NMR** (CDCl<sub>3</sub>, 125 MHz): δ 194.9, 171.3, 155.1, 148.5, 135.5, 132.0, 129.7, 128.6, 128.2, 125.0, 118.0, 114.2, 84.4, 80.1, 53.1, 52.3, 38.9, 38.4, 28.3, 27.9; **HRMS** (ESI) *m/z*: [M + H]<sup>+</sup> calcd for C<sub>26</sub>H<sub>34</sub>N<sub>2</sub>O<sub>7</sub>SBr 597.1090, found 597.1118.

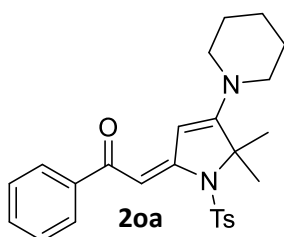

30 mg (70% yield), orange solid, purified by flash column chromatography (SiO<sub>2</sub>, EtOAc–hexanes, 1:5). **<sup>1</sup>H NMR** (CDCl<sub>3</sub>, 500 MHz): δ 7.86 (d, 2H, *J* = 8.4 Hz), 7.76 (d, 2H, *J* = 6.9 Hz), 7.42–7.33 (m, 3H), 7.27 (d, 2H, *J* = 8.4 Hz), 6.91 (s, 1H), 6.48 (s, 1H), 3.44 (t, 4H, *J* = 5.3 Hz), 2.39 (s, 3H), 1.96 (s, 6H), 1.72–1.62 (m, 6H); **<sup>13</sup>C NMR** (CDCl<sub>3</sub>, 125 MHz): δ 188.1, 166.6, 159.0, 144.1, 141.7, 138.3, 130.6, 129.7, 128.1, 127.4, 127.3, 92.3, 90.9, 71.9, 49.8, 25.8, 25.5, 24.09, 21.5; **HRMS** (ESI) *m/z*: [M + H]<sup>+</sup> calcd for C<sub>26</sub>H<sub>31</sub>N<sub>2</sub>O<sub>3</sub>S 451.2055, found 451.2059.

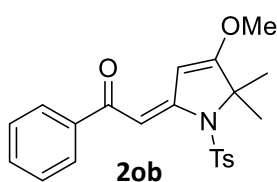

30 mg (80% yield), orange solid, purified by flash column chromatography (SiO<sub>2</sub>, EtOAc–hexanes, 1:5). **<sup>1</sup>H NMR** (CDCl<sub>3</sub>, 500 MHz): δ 7.86 (d, 2H, *J* = 8.4 Hz), 7.82 (d, 2H, *J* = 7.4 Hz), 7.48 (t, 1H, *J* = 7.3 Hz), 7.42 (t, 2H, *J* = 7.4 Hz), 7.30 (d, 2H, *J* = 8.4 Hz), 6.95 (s, 1H), 6.78 (s, 1H), 3.89 (s, 3H), 2.40 (s, 3H), 1.74 (s, 6H); **<sup>13</sup>C NMR** (CDCl<sub>3</sub>, 125 MHz): δ 189.2, 175.7, 157.4, 144.5, 140.6, 137.4, 131.5, 129.8, 128.3, 127.6, 127.4, 95.1, 92.9, 70.6, 58.6, 24.9, 21.6; **HRMS** (ESI) *m/z*: [M + H]<sup>+</sup> calcd for C<sub>22</sub>H<sub>24</sub>NO<sub>4</sub>S 398.1426, found 398.1424.

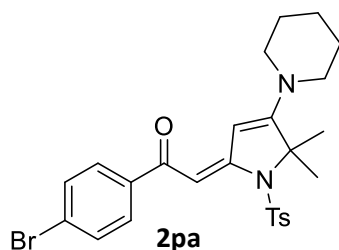

28 mg (71% yield), orange solid, purified by flash column chromatography (SiO<sub>2</sub>, EtOAc–hexanes, 1:5). **<sup>1</sup>H NMR** (CDCl<sub>3</sub>, 500 MHz): δ 7.83 (d, 2H, *J* = 8.3 Hz), 7.62 (d, 2H, *J* = 8.6 Hz), 7.49 (d, 2H, *J* = 8.6 Hz), 7.28 (d, 2H, *J* = 8.3 Hz), 6.89 (s, 1H), 6.39 (s, 1H), 3.44 (t, 4H, *J* = 5.3 Hz), 2.39 (s, 3H), 1.96 (s, 6H), 1.75–1.61 (m, 6H); **<sup>13</sup>C NMR** (CDCl<sub>3</sub>, 125 MHz): δ 186.6, 167.1, 159.5, 144.3, 140.6, 138.2, 131.2, 129.7, 129.0, 127.2, 125.2, 92.2, 90.3, 72.0, 49.9, 25.9, 25.5, 24.1, 21.6; **HRMS** (ESI) *m/z*: [M + H]<sup>+</sup> calcd for C<sub>26</sub>H<sub>30</sub>N<sub>2</sub>O<sub>3</sub>SBr 529.1161, found 529.1154.

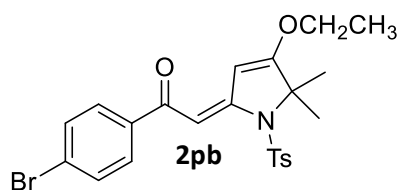

25 mg (61% yield), orange solid, purified by flash column chromatography (SiO<sub>2</sub>, EtOAc–hexanes, 1:5). **<sup>1</sup>H NMR** (CDCl<sub>3</sub>, 500 MHz): δ 7.84 (d, 2H, *J* = 8.4 Hz), 7.67 (d, 2H, *J* = 8.5 Hz), 7.54 (d, 2H, *J* = 8.5 Hz), 7.30 (d, 2H, *J* = 8.4 Hz), 6.89 (s, 1H), 6.68 (s, 1H), 4.12 (q, 2H, *J* = 7.1 Hz), 2.41 (s, 3H), 1.74 (s, 6H), 1.41 (t, 3H, *J* = 7.1 Hz); **<sup>13</sup>C NMR** (CDCl<sub>3</sub>, 125 MHz): δ 187.8, 175.3, 158.4, 144.6, 139.5, 137.3, 131.5, 129.8, 129.2, 127.4, 126.3, 94.3, 92.9, 70.8, 67.6, 24.9, 21.6, 14.2; **HRMS** (ESI) *m/z*: [M + H]<sup>+</sup> calcd for C<sub>23</sub>H<sub>25</sub>NO<sub>4</sub>SBr 490.0688, found 490.0682.

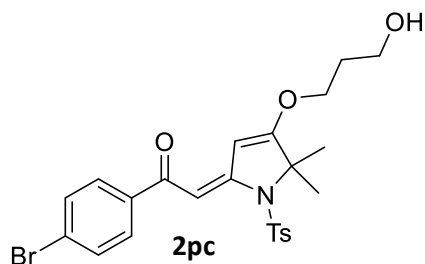

25 mg (70% yield), orange solid, purified by flash column chromatography (SiO<sub>2</sub>, EtOAc–hexanes, 1:5). **<sup>1</sup>H NMR** (CDCl<sub>3</sub>, 500 MHz): δ 7.84 (d, 2H, *J* = 8.3 Hz), 7.66 (d, 2H, *J* = 8.5 Hz), 7.54 (d, 2H, *J* = 8.5 Hz), 7.30 (d, 2H, *J* = 8.3 Hz), 6.93 (s, 1H), 6.68 (s, 1H), 4.21 (t, 2H, *J* = 6.2 Hz), 3.82–3.74 (m, 2H), 2.41 (s, 3H), 2.04 (t, 2H, *J* = 6.2 Hz), 1.74 (s, 6H), 1.62 (s, 1H); **<sup>13</sup>C NMR** (CDCl<sub>3</sub>, 125 MHz): δ 187.9, 175.1, 158.1, 144.7, 139.5, 137.3, 131.5, 129.8, 129.2, 127.4, 126.3, 94.5, 93.2, 70.8, 68.7, 59.1, 31.4, 24.9, 21.6; **HRMS** (ESI) *m/z*: [M + H]<sup>+</sup> calcd for C<sub>24</sub>H<sub>27</sub>NO<sub>5</sub>SBr 520.0793, found 520.0789.

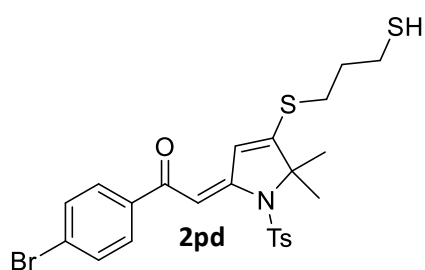

9 mg (23% yield), orange solid, purified by flash column chromatography (SiO<sub>2</sub>, EtOAc–hexanes, 1:5). **<sup>1</sup>H NMR** (CDCl<sub>3</sub>, 500 MHz): δ 7.83 (d, 2H, *J* = 8.3 Hz), 7.66 (d, 2H, *J* = 8.5 Hz), 7.55 (d, 2H, *J* = 8.5 Hz), 7.48 (s, 1H), 7.31 (d, 2H, *J* = 8.3 Hz), 6.63 (s, 1H), 3.13 (t, 2H, *J* = 7.1 Hz), 2.72–2.63 (m, 2H), 2.41 (s, 3H), 2.05 (t, 2H, *J* = 7.1 Hz), 1.81 (s, 6H); **<sup>13</sup>C NMR** (CDCl<sub>3</sub>, 125 MHz): δ 178.2, 159.3, 144.3, 137.4, 134.1, 131.6, 131.4, 129.9, 129.3, 127.4, 126.6, 113.4, 94.6, 71.6, 31.7, 30.2, 23.4, 22.7, 21.7; **HRMS** (ESI) *m/z*: [M + H]<sup>+</sup> calcd for C<sub>24</sub>H<sub>27</sub>NO<sub>3</sub>S<sub>3</sub>Br 552.0336, found 552.0334.

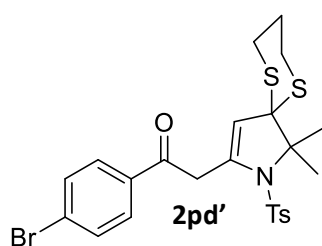

17 mg (47% yield), orange solid, purified by flash column chromatography (SiO<sub>2</sub>, EtOAc–hexanes, 1:5). **<sup>1</sup>H NMR** (CDCl<sub>3</sub>, 500 MHz): δ 7.88 (d, 2H, *J* = 8.3 Hz), 7.61 (d, 2H, *J* = 8.5 Hz), 7.53 (d, 2H, *J* = 8.5 Hz), 7.35 (d, 2H, *J* = 8.3 Hz), 6.93 (s, 1H), 4.09 (s, 2H), 3.08 (t, 2H, *J* = 13.8 Hz), 2.83–2.75 (m, 2H), 2.44 (s, 3H), 2.19–2.09 (m, 2H), 1.78 (s, 6H); **<sup>13</sup>C NMR** (CDCl<sub>3</sub>, 125 MHz): δ 188.7, 156.7, 144.7, 138.7, 137.4, 131.6, 129.9, 129.4, 127.1, 126.9, 100.4, 65.6, 61.0, 44.1, 27.5, 27.2, 25.2, 24.2; **HRMS** (ESI) *m/z*: [M + H]<sup>+</sup> calcd for C<sub>24</sub>H<sub>27</sub>NO<sub>3</sub>S<sub>3</sub>Br 552.0336, found 552.0334.

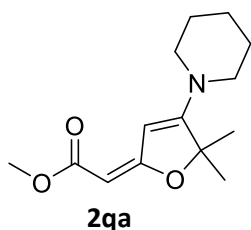

15 mg (71% yield), pale-yellow oil, purified by flash column chromatography (SiO<sub>2</sub>, EtOAc–hexanes, 1:5). **<sup>1</sup>H NMR** (CDCl<sub>3</sub>, 500 MHz): δ 6.00 (s, 1H), 4.74 (s, 1H), 3.64 (s, 3H), 3.30 (t, 4H, *J* = 5.4 Hz), 1.68–1.59 (m, 6H), 1.56 (s, 6H); **<sup>13</sup>C NMR** (CDCl<sub>3</sub>, 125 MHz): δ 175.6, 170.2, 167.6, 88.9, 86.2, 78.3, 50.1, 49.3, 25.9, 25.7, 24.0; **HRMS** (ESI) *m/z*: [M + H]<sup>+</sup> calcd for C<sub>14</sub>H<sub>22</sub>NO<sub>3</sub> 252.1600, found 252.1601.

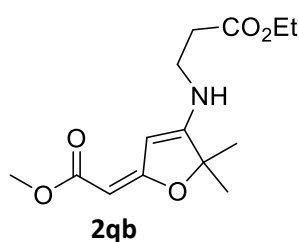

9 mg (75% yield), clear oil, purified by flash column chromatography (SiO<sub>2</sub>, EtOAc–hexanes, 1:5). **<sup>1</sup>H NMR** (CDCl<sub>3</sub>, 500 MHz): δ 6.00 (s, 1H), 4.85 (s, 1H), 4.68 (s, 1H), 4.16 (q, 2H, *J* = 7.2 Hz), 3.65 (s, 3H), 3.44 (q, 2H, *J* = 6.1 Hz), 2.62 (q, 2H, *J* = 6.1 Hz), 1.40 (s, 6H), 1.27 (t, 3H, *J* = 7.2 Hz); **<sup>13</sup>C NMR** (CDCl<sub>3</sub>, 125 MHz): δ 176.1, 172.4, 170.1, 165.7, 86.7, 85.9, 80.0, 61.0, 50.3, 40.6, 32.7, 25.4, 14.2; **HRMS** (ESI) *m/z*: [M + H]<sup>+</sup> calcd for C<sub>14</sub>H<sub>22</sub>NO<sub>5</sub> 284.1498, found 284.1500.

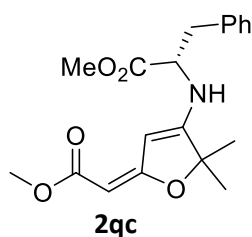

9 mg (62% yield), clear oil, purified by flash column chromatography (SiO<sub>2</sub>, EtOAc–hexanes, 1:5). **<sup>1</sup>H NMR** (CDCl<sub>3</sub>, 500 MHz): δ 7.31–7.23 (m, 3H), 7.04 (d, 2H, *J* = 6.0 Hz), 6.06 (s, 1H), 4.89 (s, 1H), 4.53 (d, 1H, *J* = 7.5 Hz), 4.35 (dt, 1H, *J* = 7.5, 5.3 Hz), 3.78 (s, 3H), 3.66 (s, 3H), 3.28 (dd, 1H, *J* = 14.0, 5.1 Hz), 3.12 (dd, 1H, *J* = 14.0, 5.1 Hz), 1.40 (d, 6H, *J* = 8.2 Hz); **<sup>13</sup>C NMR** (CDCl<sub>3</sub>, 125 MHz): δ 175.7, 171.5, 170.0, 163.7, 135.0, 129.3, 128.6, 127.4, 87.6, 86.2, 80.7, 57.7, 52.6, 50.3, 36.7, 25.6, 25.3; **HRMS** (ESI) *m/z*: [M + H]<sup>+</sup> calcd for C<sub>19</sub>H<sub>24</sub>NO<sub>5</sub> 346.1654, found 346.1649.

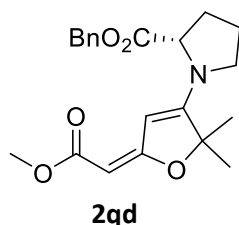

6 mg (40% yield), clear oil, purified by flash column chromatography (SiO<sub>2</sub>, EtOAc–hexanes, 1:5). **<sup>1</sup>H NMR** (CDCl<sub>3</sub>, 500 MHz): δ 7.39–7.30 (m, 5H), 5.87 (s, 1H), 5.20 (d, 1H, *J* = 12.1 Hz), 5.13 (d, 1H, *J* = 12.1 Hz), 4.79 (s, 1H), 4.32 (dd, 1H, *J* = 8.7, 2.2 Hz), 3.64 (s, 3H), 3.51–3.45 (m, 1H), 2.31–2.20 (m, 1H), 2.14–1.99 (m, 4H), 1.51 (s, 3H), 1.46 (s, 3H); **<sup>13</sup>C NMR** (CDCl<sub>3</sub>, 125 MHz): δ 175.0, 172.0, 169.8, 164.5, 135.2, 128.7, 128.6, 128.5, 91.0, 86.3, 79.6, 67.3, 62.1, 50.2, 48.8, 30.3, 25.4, 24.8; **HRMS** (ESI) *m/z*: [M + H]<sup>+</sup> calcd for C<sub>21</sub>H<sub>26</sub>NO<sub>5</sub> 372.1811, found 372.1808.

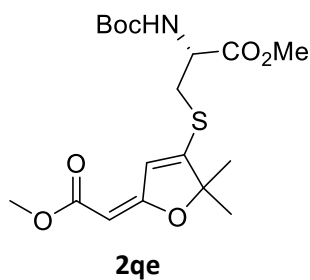

14 mg (58% yield), clear oil, purified by flash column chromatography (SiO<sub>2</sub>, EtOAc–hexanes, 1:5). **<sup>1</sup>H NMR** (CDCl<sub>3</sub>, 500 MHz): δ 6.95 (s, 1H), 5.34–5.28 (m, 1H), 5.04 (s, 1H), 4.69 (s, 1H), 3.77 (s, 3H), 3.67 (s, 3H), 3.49 (dd, 1H, *J* = 13.2, 6.1 Hz), 3.33 (dd, 1H, *J* = 13.2, 6.1 Hz), 1.45 (s, 9H), 1.44 (s, 6H); **<sup>13</sup>C NMR** (CDCl<sub>3</sub>, 125 MHz): δ 172.1, 170.5, 168.9, 161.6, 154.9, 112.7, 91.8, 84.8, 80.6, 53.0, 52.1, 50.7, 35.4, 28.3, 26.5, 26.3; **HRMS** (ESI) *m/z*: [M + H]<sup>+</sup> calcd for C<sub>18</sub>H<sub>28</sub>NO<sub>7</sub>S 402.1586, found 402.1580.

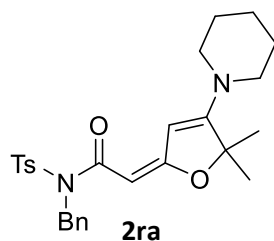

25 mg (76% yield), pale-yellow oil, purified by flash column chromatography (SiO<sub>2</sub>, EtOAc–hexanes, 1:5). **<sup>1</sup>H NMR** (CDCl<sub>3</sub>, 500 MHz): δ 7.71 (d, 2H, *J* = 8.4 Hz), 7.39 (d, 2H, *J* = 7.8 Hz), 7.30 (t, 2H, *J* = 7.6 Hz), 7.25–7.18 (m, 3H), 6.04 (s, 1H), 5.34 (s, 1H), 5.08 (s, 2H), 3.30 (t, 4H, *J* = 5.5 Hz), 2.38 (s, 3H), 1.68–1.61 (m, 2H), 1.58 (t, 4H, *J* = 5.5 Hz), 1.51 (s, 6H); **<sup>13</sup>C NMR** (CDCl<sub>3</sub>, 125 MHz): δ 177.7, 169.8, 167.2, 143.3, 138.3, 138.2, 129.2, 128.4, 127.7, 127.3, 126.9, 89.6, 86.1, 80.4, 49.5, 49.1, 25.8, 25.6, 23.9, 21.5; **HRMS** (ESI) *m/z*: [M + H]<sup>+</sup> calcd for C<sub>27</sub>H<sub>33</sub>N<sub>2</sub>O<sub>4</sub>S 481.2161, found 481.2164.



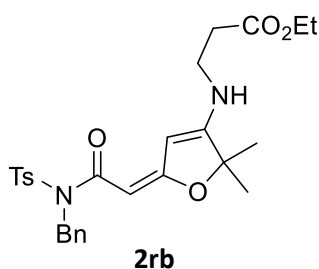

20 mg (77% yield), pale-yellow oil, purified by flash column chromatography (SiO<sub>2</sub>, EtOAc–hexanes, 1:5). **<sup>1</sup>H NMR** (CDCl<sub>3</sub>, 500 MHz): δ 7.71 (d, 2H, *J* = 8.3 Hz), 7.39 (d, 2H, *J* = 7.8 Hz), 7.30 (t, 2H, *J* = 7.6 Hz), 7.26–7.19 (m, 3H), 6.04 (s, 1H), 5.45 (s, 1H), 5.09 (s, 2H), 4.86 (t, 1H, *J* = 6.2 Hz), 4.14 (q, 2H, *J* = 7.2 Hz), 3.40 (q, 2H, *J* = 6.1 Hz), 2.57 (t, 2H, *J* = 5.9 Hz), 2.38 (s, 3H), 1.34 (s, 6H), 1.25 (t, 3H, *J* = 7.2 Hz); **<sup>13</sup>C NMR** (CDCl<sub>3</sub>, 125 MHz): δ 178.3, 172.3, 168.2, 167.3, 143.4, 138.1, 129.3, 128.4, 127.7, 127.3, 127.0, 87.6, 85.8, 81.9, 61.0, 49.2, 40.6, 32.8, 25.3, 21.6, 14.2; **HRMS** (ESI) *m/z*: [M + H]<sup>+</sup> calcd for C<sub>27</sub>H<sub>33</sub>N<sub>2</sub>O<sub>6</sub>S 513.2059, found 513.2064.

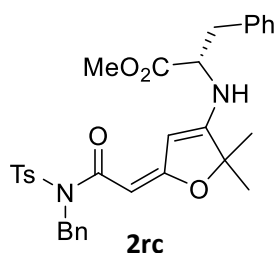

8 mg (55% yield), pale-yellow oil, purified by flash column chromatography (SiO<sub>2</sub>, EtOAc–hexanes, 1:5). **<sup>1</sup>H NMR** (CDCl<sub>3</sub>, 500 MHz): δ 7.73 (d, 2H, *J* = 8.3 Hz), 7.40 (d, 2H, *J* = 7.2 Hz), 7.32 (t, 2H, *J* = 7.6 Hz), 7.27–7.17 (m, 6H), 6.99 (d, 2H, *J* = 7.6 Hz), 6.10 (s, 1H), 5.50 (s, 1H), 5.10 (s, 2H), 4.63 (d, 1H, *J* = 7.6 Hz), 4.33 (dt, 1H, *J* = 7.6, 5.2 Hz), 3.77 (s, 3H), 3.23 (dd, 1H, *J* = 14.0, 5.4 Hz), 3.08 (dd, 1H, *J* = 14.0, 5.4 Hz), 2.39 (s, 3H), 1.34 (d, 6H, *J* = 5.3 Hz); **<sup>13</sup>C NMR** (CDCl<sub>3</sub>, 125 MHz): δ 177.9, 171.3, 167.2, 166.1, 143.5, 138.1, 138.0, 134.8, 129.3, 128.6, 128.5, 127.8, 127.5, 127.3, 127.1, 88.5, 86.1, 82.6, 57.5, 52.7, 49.2, 36.7, 25.5, 25.2, 21.6; **HRMS** (ESI) *m/z*: [M + H]<sup>+</sup> calcd for C<sub>32</sub>H<sub>35</sub>N<sub>2</sub>O<sub>6</sub>S 575.2216, found 575.2214.

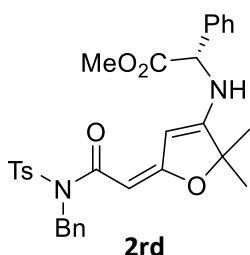

6 mg (50% yield), pale-yellow oil, purified by flash column chromatography (SiO<sub>2</sub>, EtOAc–hexanes, 1:5). **<sup>1</sup>H NMR** (CDCl<sub>3</sub>, 500 MHz): δ 7.67 (d, 2H, *J* = 8.3 Hz), 7.36–7.25 (m, 9H), 7.25–7.20 (m, 1H), 7.19 (d, 2H, *J* = 8.3 Hz), 5.89 (s, 1H), 5.47 (s, 1H), 5.35 (d, 1H, *J* = 7.1 Hz), 5.01 (d, 1H, *J* = 7.1 Hz), 4.62 (s, 2H), 3.74 (s, 3H), 2.37 (s, 3H), 1.45 (s, 3H), 1.41 (s, 3H); **<sup>13</sup>C NMR** (CDCl<sub>3</sub>, 125 MHz): δ 177.7, 171.0, 166.9, 165.7, 143.5, 138.1, 137.9, 135.2, 129.3, 129.2, 129.0, 128.4, 128.1, 127.7, 127.3, 127.0, 89.6, 86.1, 83.0, 60.7, 53.3, 49.0, 25.4, 25.2, 21.5; **HRMS** (ESI) *m/z*: [M + H]<sup>+</sup> calcd for C<sub>31</sub>H<sub>33</sub>N<sub>2</sub>O<sub>6</sub>S 561.2059, found 561.2054.

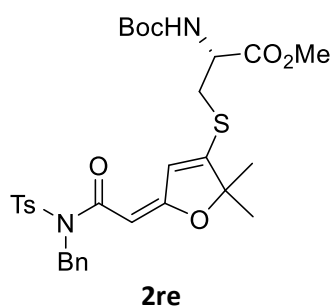

15 mg (41% yield), clear oil, purified by flash column chromatography (SiO<sub>2</sub>, EtOAc–hexanes, 1:5). **<sup>1</sup>H NMR** (CDCl<sub>3</sub>, 500 MHz): δ 7.70 (d, 2H, *J* = 8.4 Hz), 7.37 (d, 2H, *J* = 7.8 Hz), 7.31 (t, 2H, *J* = 7.5 Hz), 7.28–7.22 (m, 3H), 6.92 (s, 1H), 5.71 (s, 1H), 5.31–5.25 (m, 1H), 5.09 (s, 2H), 4.64 (s, 1H), 3.66 (s, 3H), 3.46 (dd, 1H, *J* = 13.6, 5.1 Hz), 3.29 (dd, 1H, *J* = 13.6, 5.1 Hz), 2.40 (s, 3H), 1.43 (s, 9H), 1.38 (d, 6H, *J* = 2.5 Hz); **<sup>13</sup>C NMR** (CDCl<sub>3</sub>, 125 MHz): δ 174.0, 170.4, 166.6, 164.6, 154.9, 143.9, 137.6, 129.4, 128.5, 127.8, 127.4, 127.3, 113.3, 92.0, 86.0, 80.6, 52.9, 52.0, 49.2, 35.5, 28.3, 26.4, 26.2, 21.6; **HRMS** (ESI) *m/z*: [M + H]<sup>+</sup> calcd for C<sub>31</sub>H<sub>39</sub>N<sub>2</sub>O<sub>8</sub>S<sub>2</sub> 631.2148, found 631.2141.

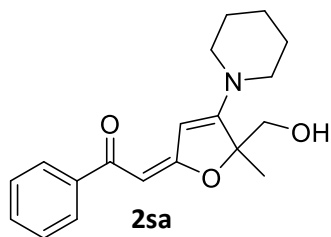

8 mg (65% yield), red oil, purified by flash column chromatography (SiO<sub>2</sub>, EtOAc–hexanes, 1:5). **<sup>1</sup>H NMR** (CDCl<sub>3</sub>, 500 MHz): δ 7.91 (d, 2H, *J* = 7.9 Hz), 7.44–7.35 (m, 3H), 6.62 (s, 1H), 6.03 (s, 1H), 3.93–3.82 (m, 2H), 3.41 (t, 4H, *J* = 5.3 Hz), 2.08 (s, 1H), 1.69–1.62 (m, 6H), 1.59 (s, 3H); **<sup>13</sup>C NMR** (CDCl<sub>3</sub>, 125 MHz): δ 188.2, 177.1, 167.2, 141.3, 130.6, 128.1, 127.2, 92.5, 89.0, 87.5, 67.2, 49.9, 25.8, 24.0, 20.6; **HRMS** (ESI) *m/z*: [M + H]<sup>+</sup> calcd for C<sub>19</sub>H<sub>24</sub>NO<sub>3</sub> 314.1572, found 314.1567.

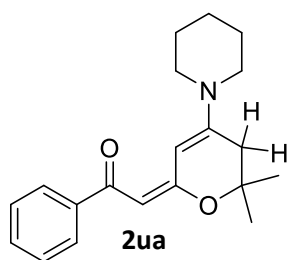

9 mg (20% yield), yellow oil, purified by flash column chromatography (SiO<sub>2</sub>, EtOAc–hexanes, 1:5). **<sup>1</sup>H NMR** (CDCl<sub>3</sub>, 500 MHz): δ 7.91 (d, 2H, *J* = 8.2 Hz), 7.42–7.34 (m, 3H), 7.31 (s, 1H), 5.96 (s, 1H), 3.40 (t, 4H, *J* = 5.3 Hz), 2.44 (s, 2H), 1.72–1.60 (m, 6H), 1.42 (s, 6H); **<sup>13</sup>C NMR** (CDCl<sub>3</sub>, 125 MHz): δ 188.4, 169.7, 154.3, 142.2, 130.2, 127.9, 127.2, 93.9, 89.0, 75.0, 47.5, 37.6, 27.2, 25.7; **HRMS** (ESI) *m/z*: [M + H]<sup>+</sup> calcd for C<sub>20</sub>H<sub>26</sub>NO<sub>2</sub> 312.1964, found 312.1960.

# <sup>1</sup>H and <sup>13</sup>C NMR Spectra of Substrates

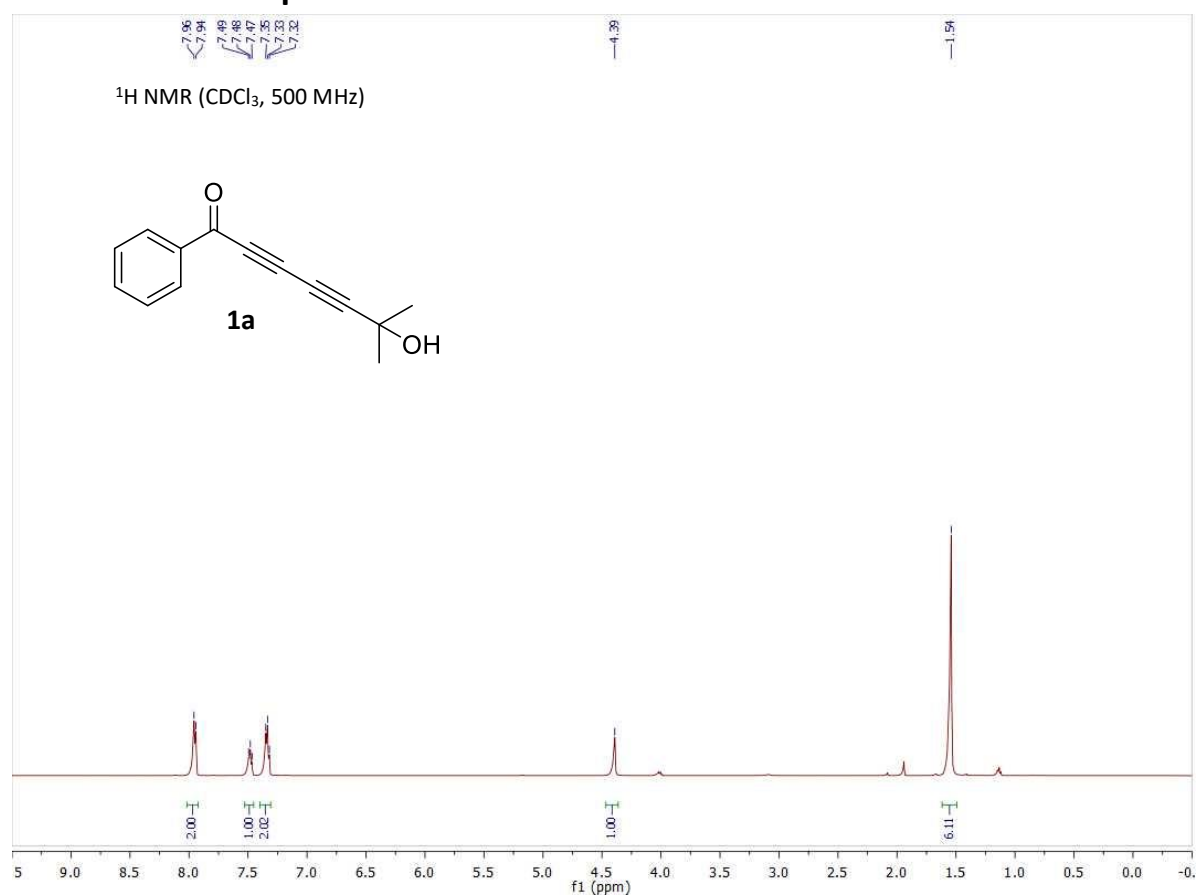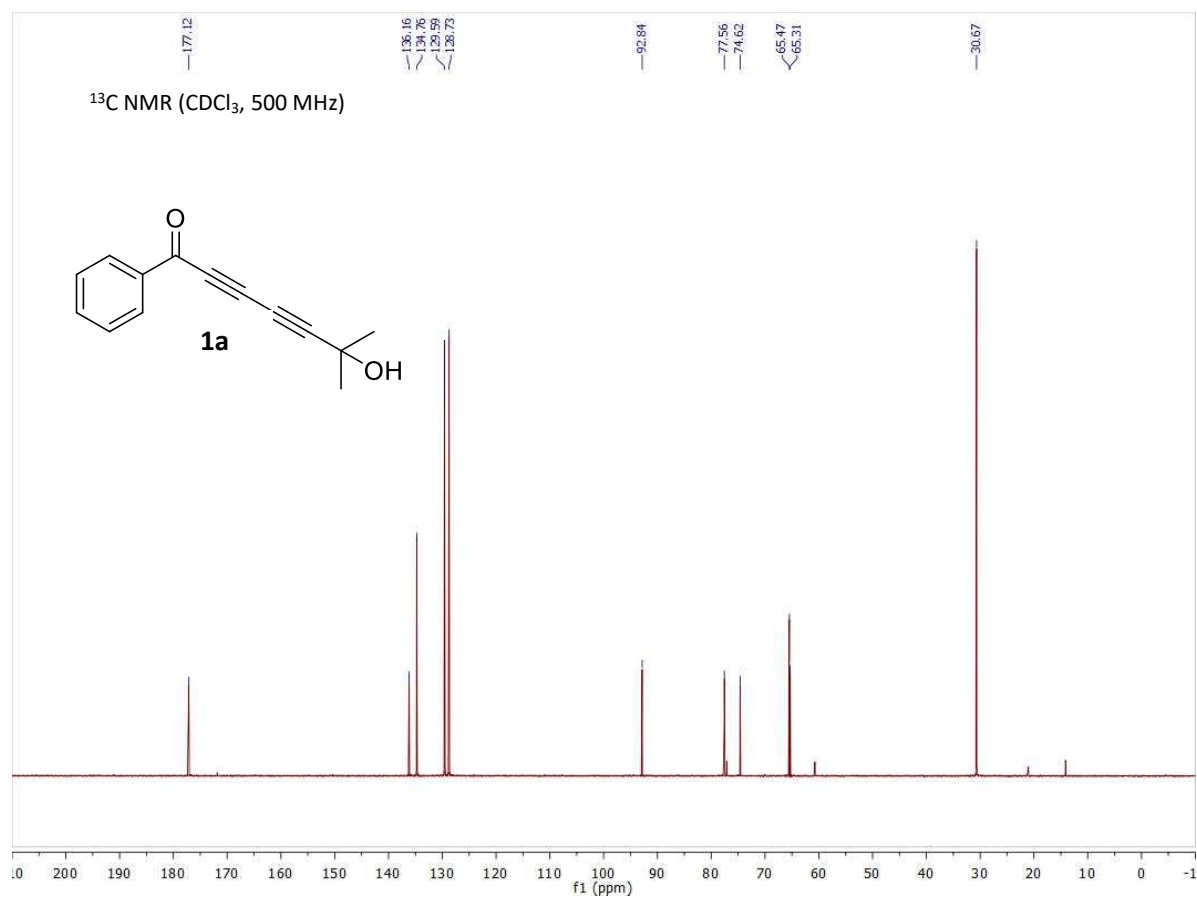

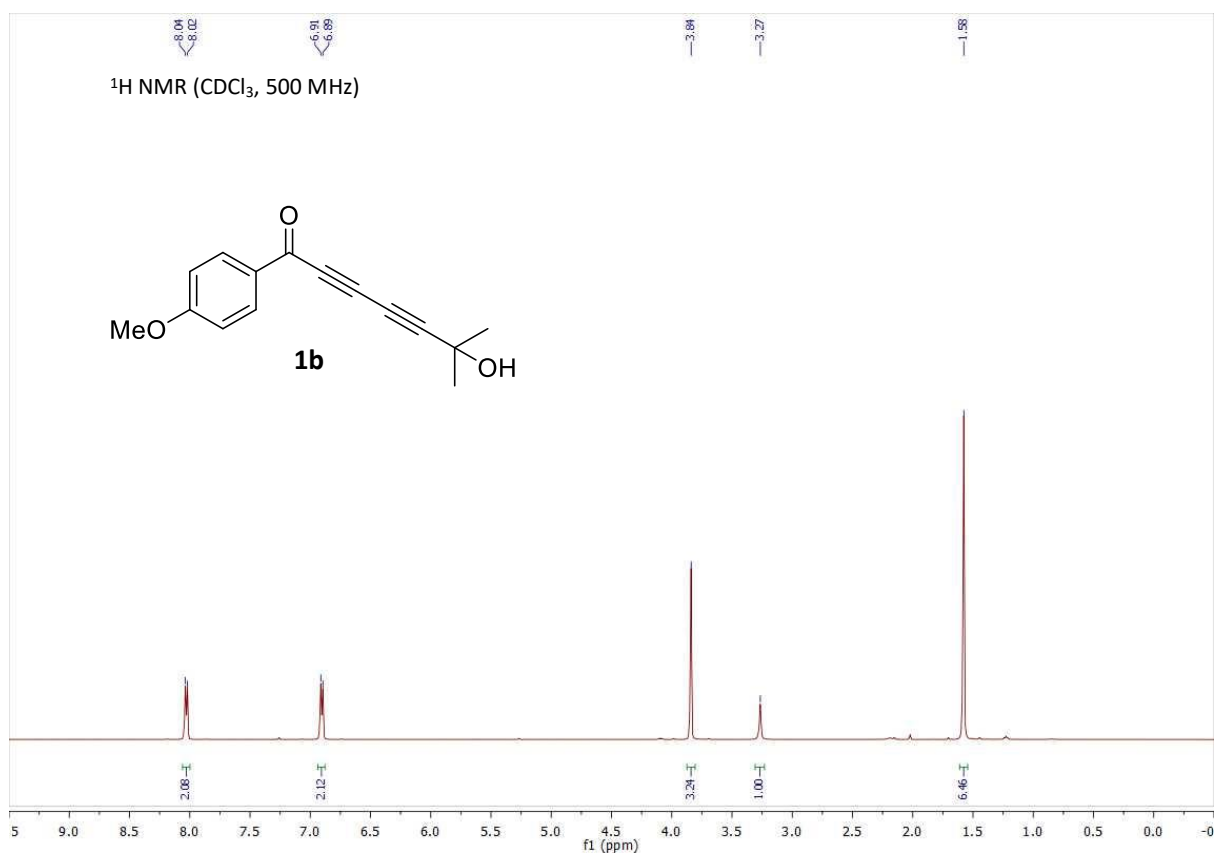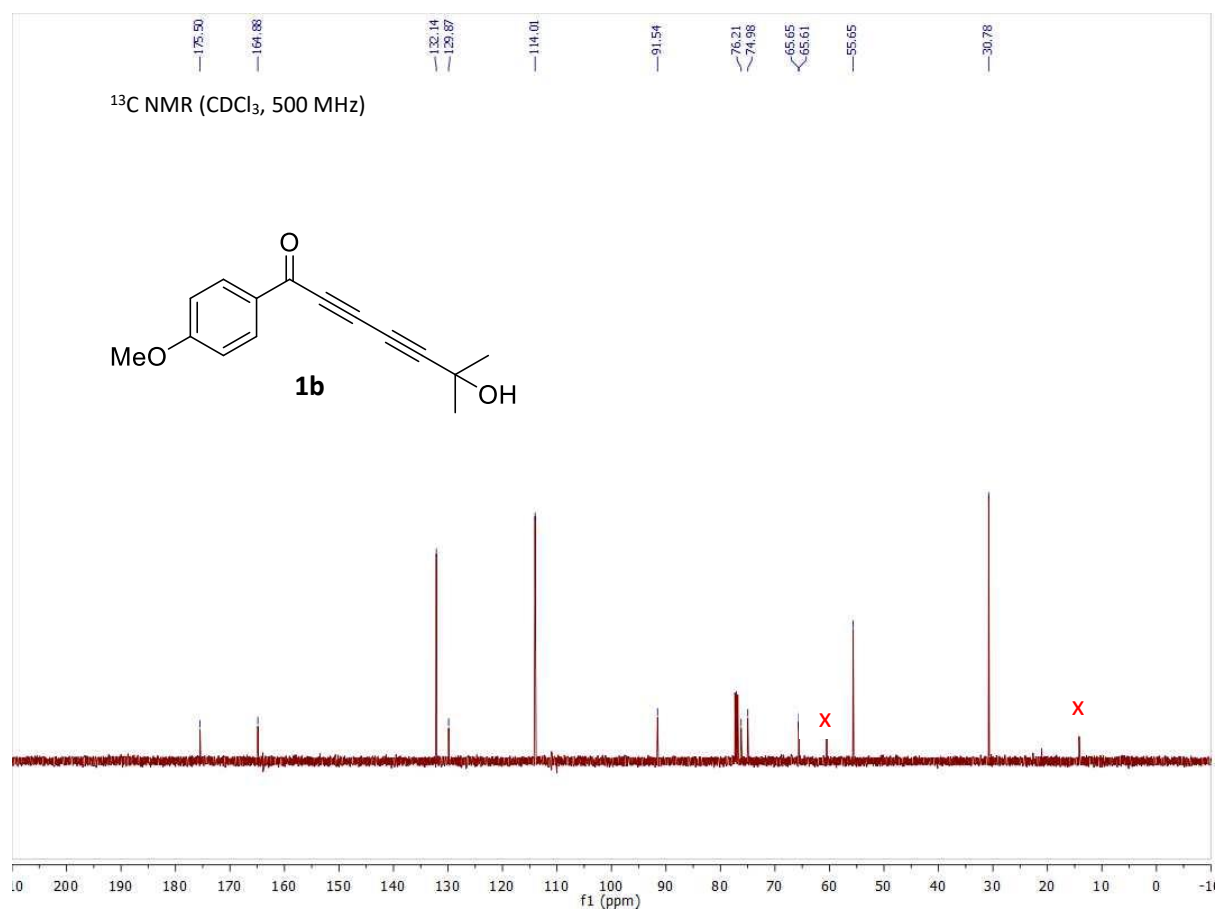

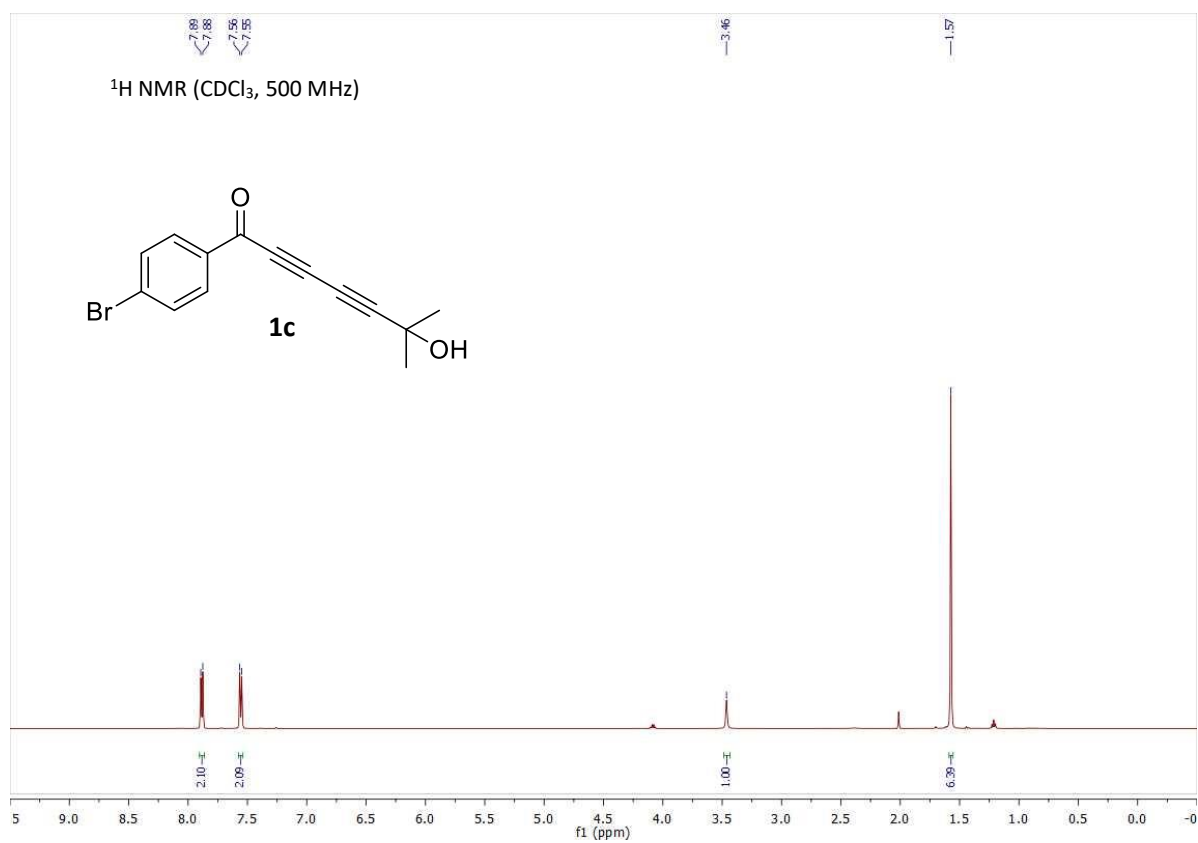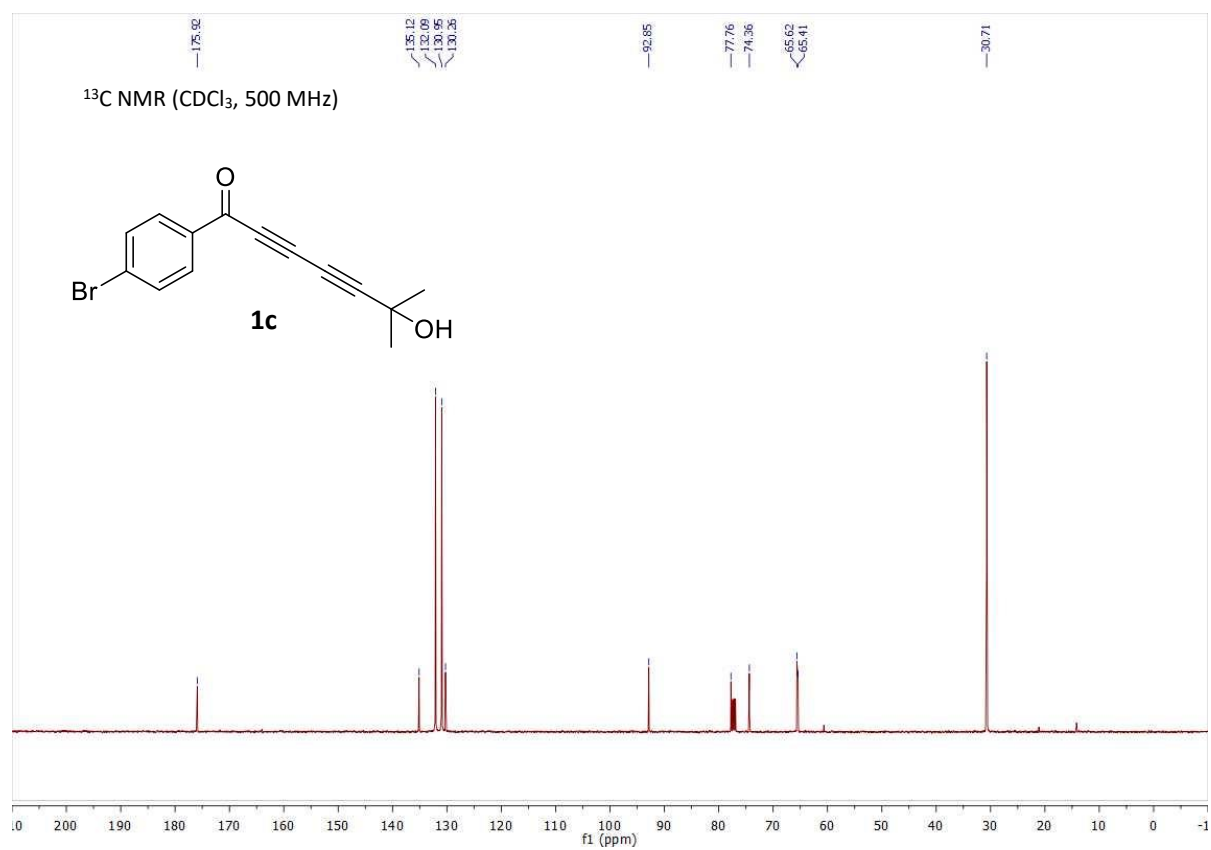



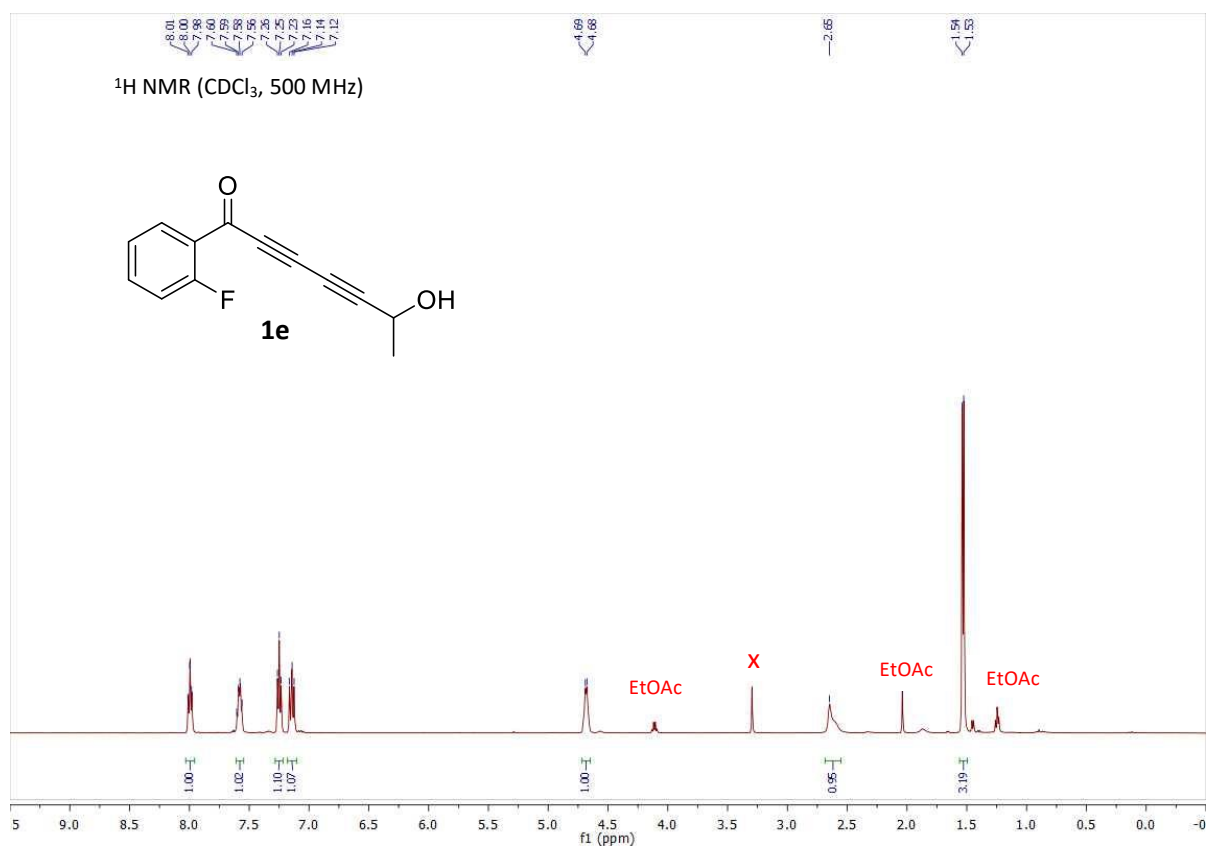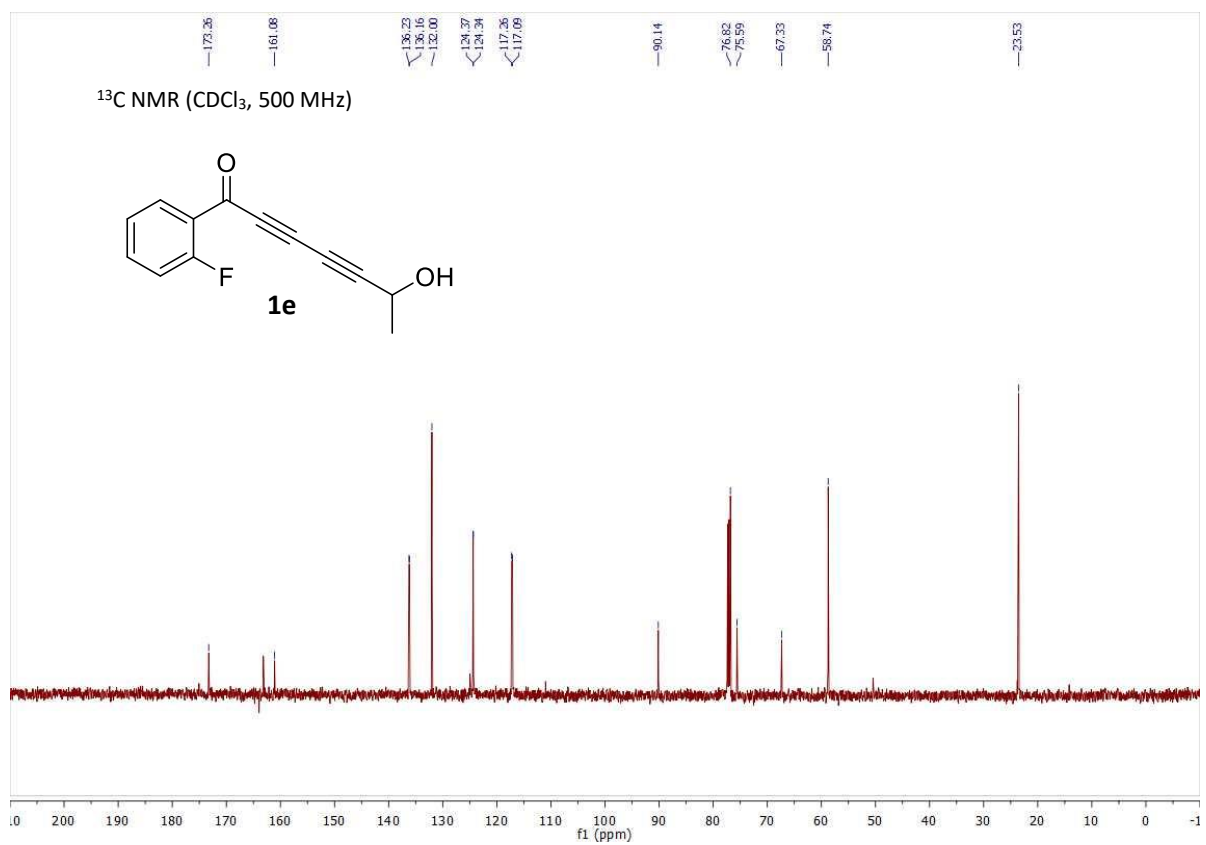

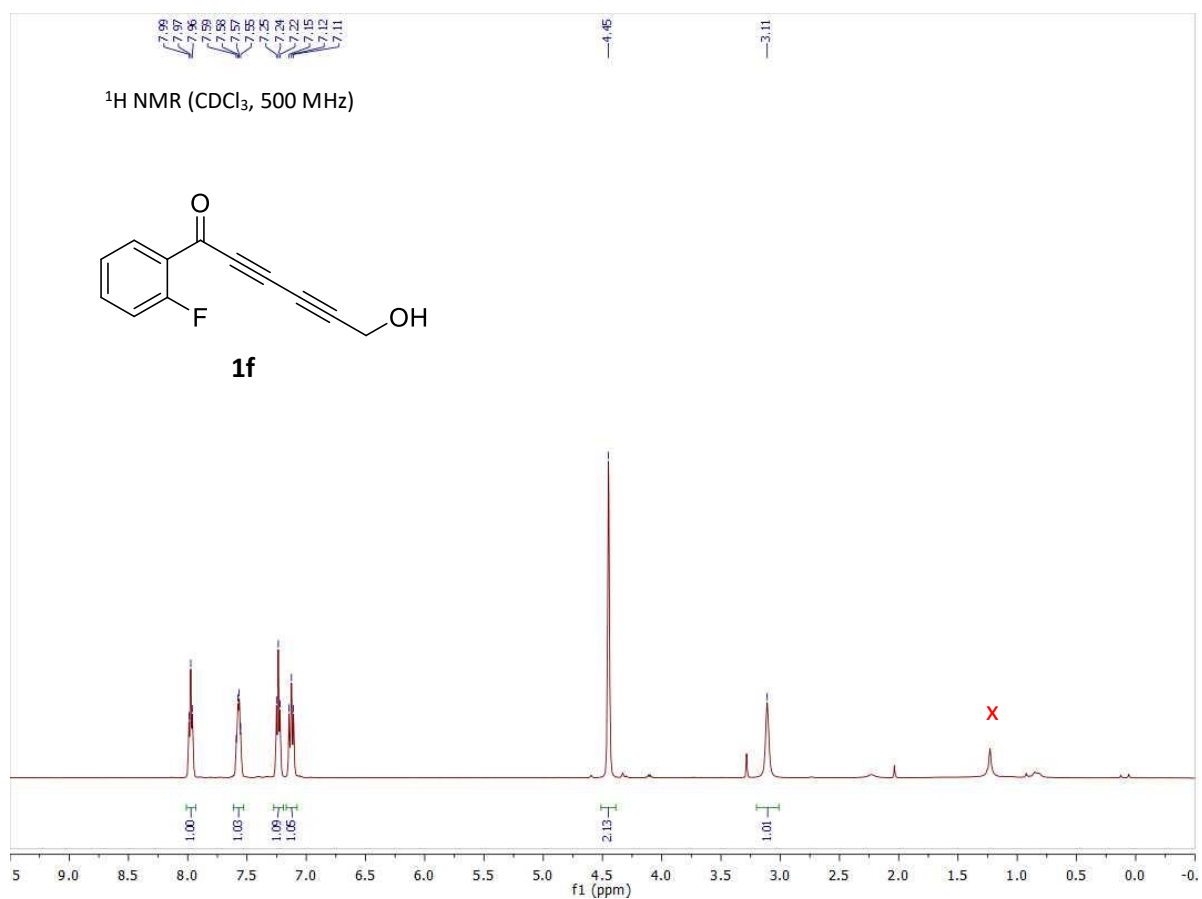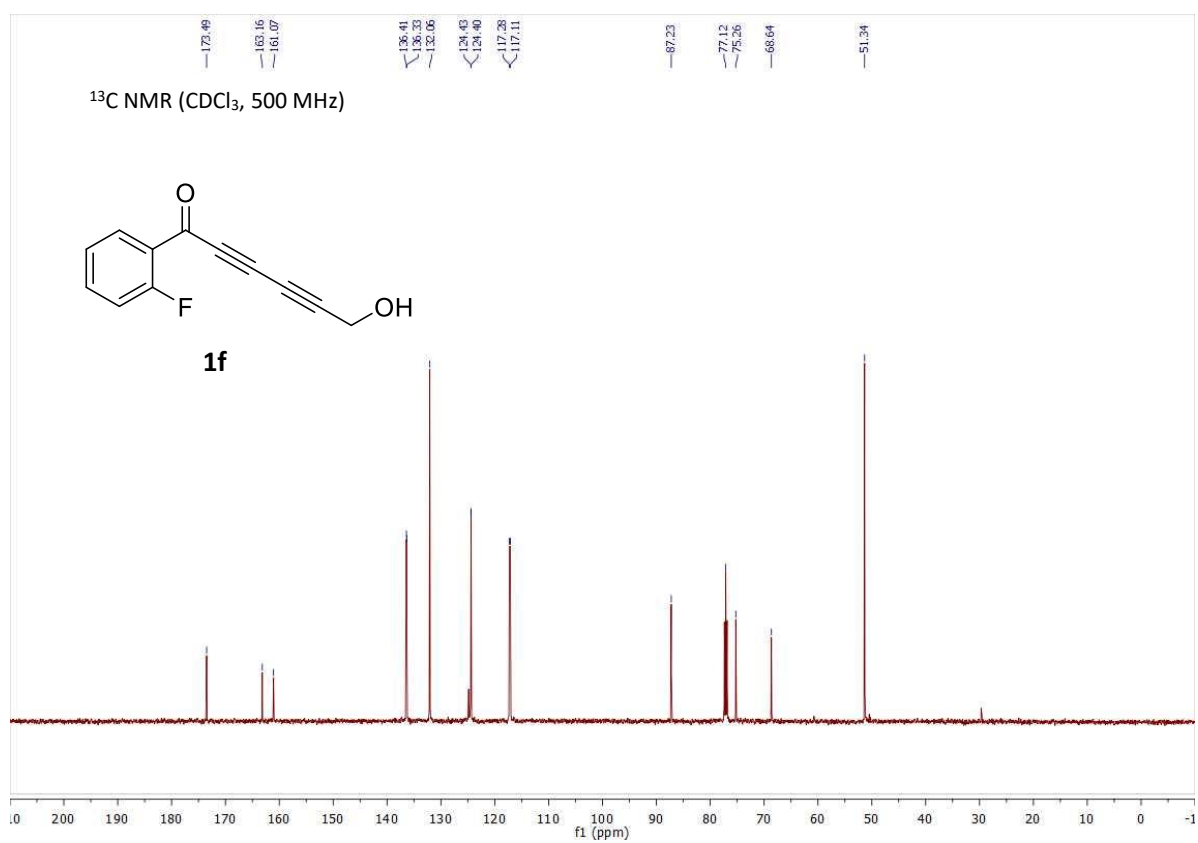



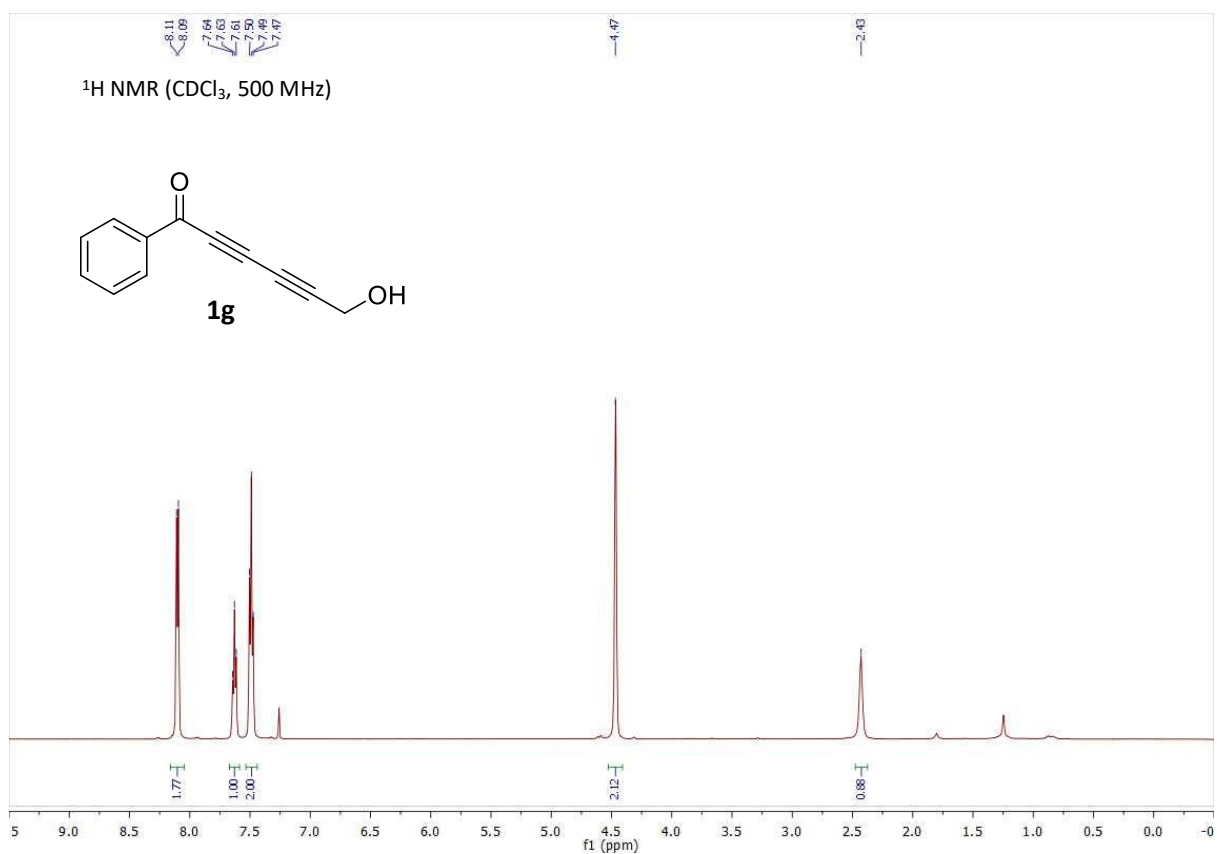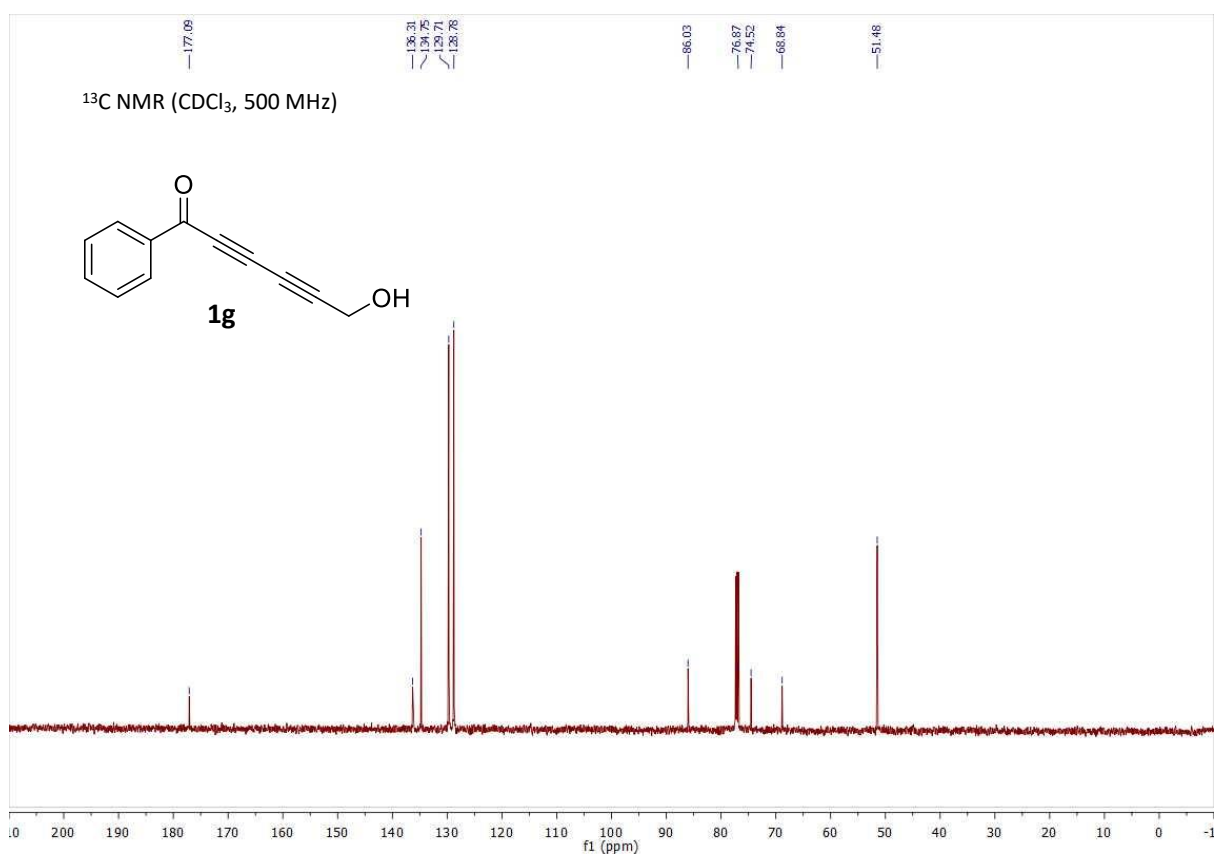

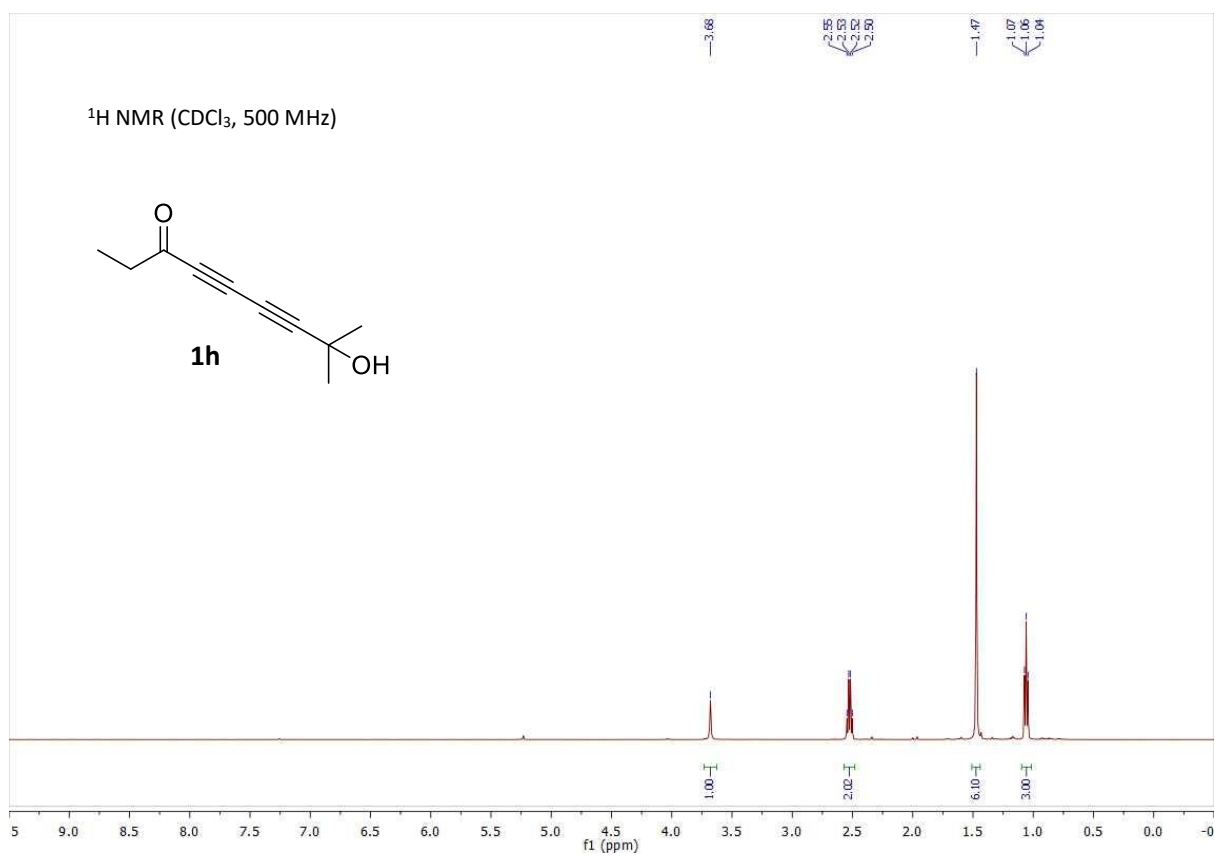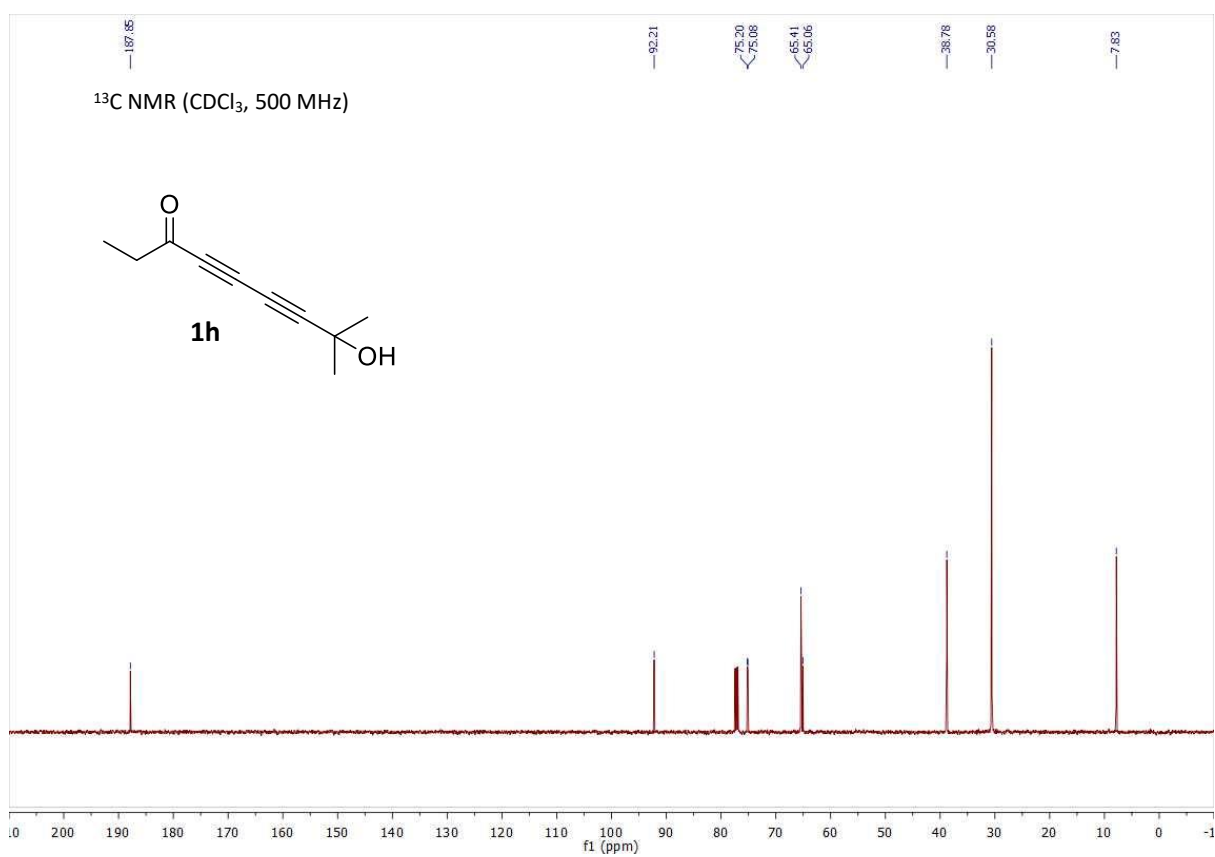

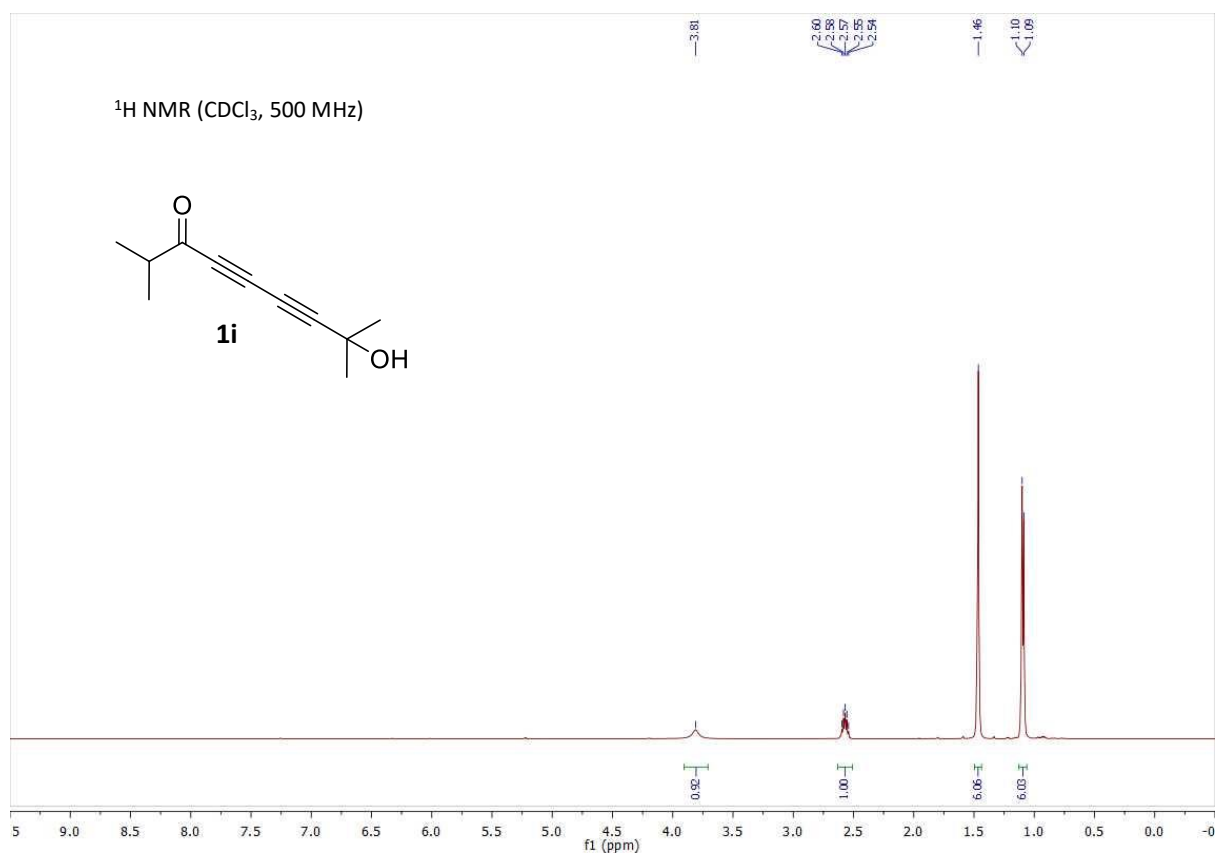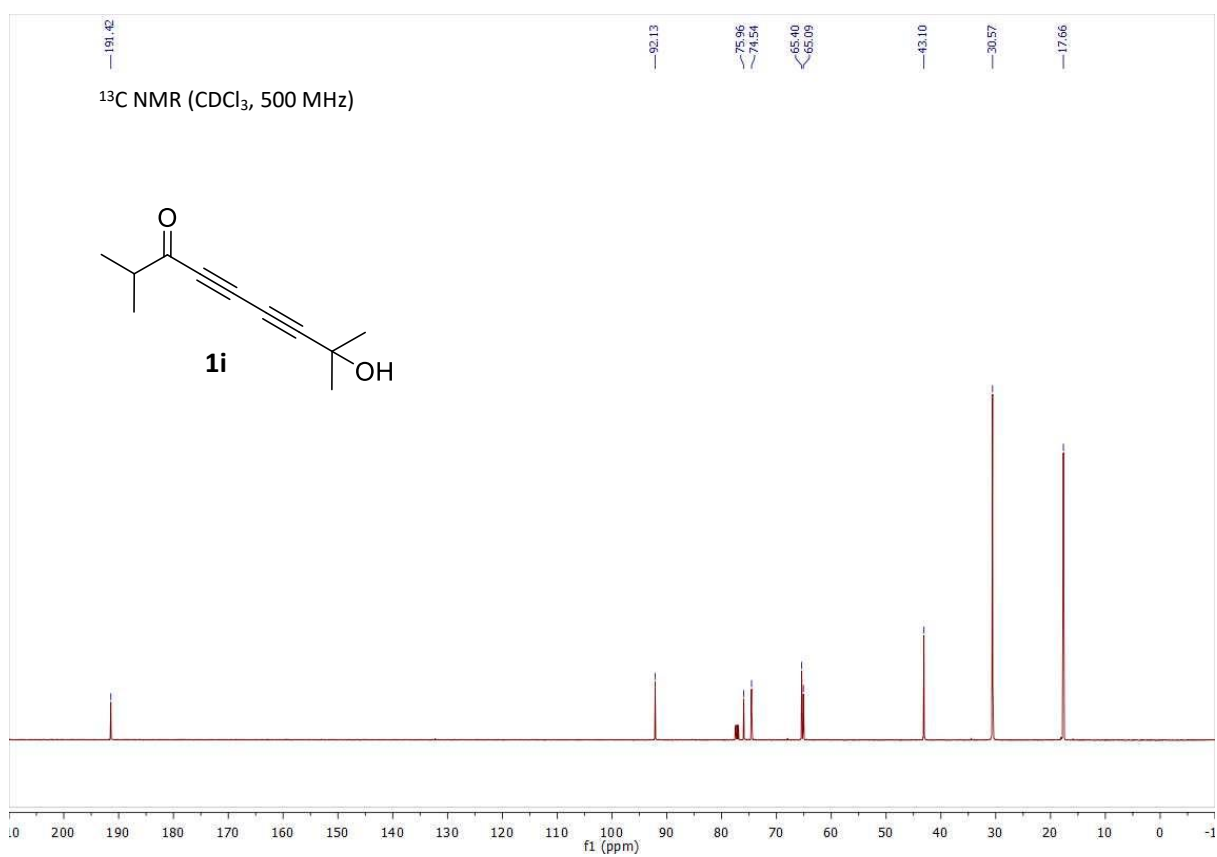

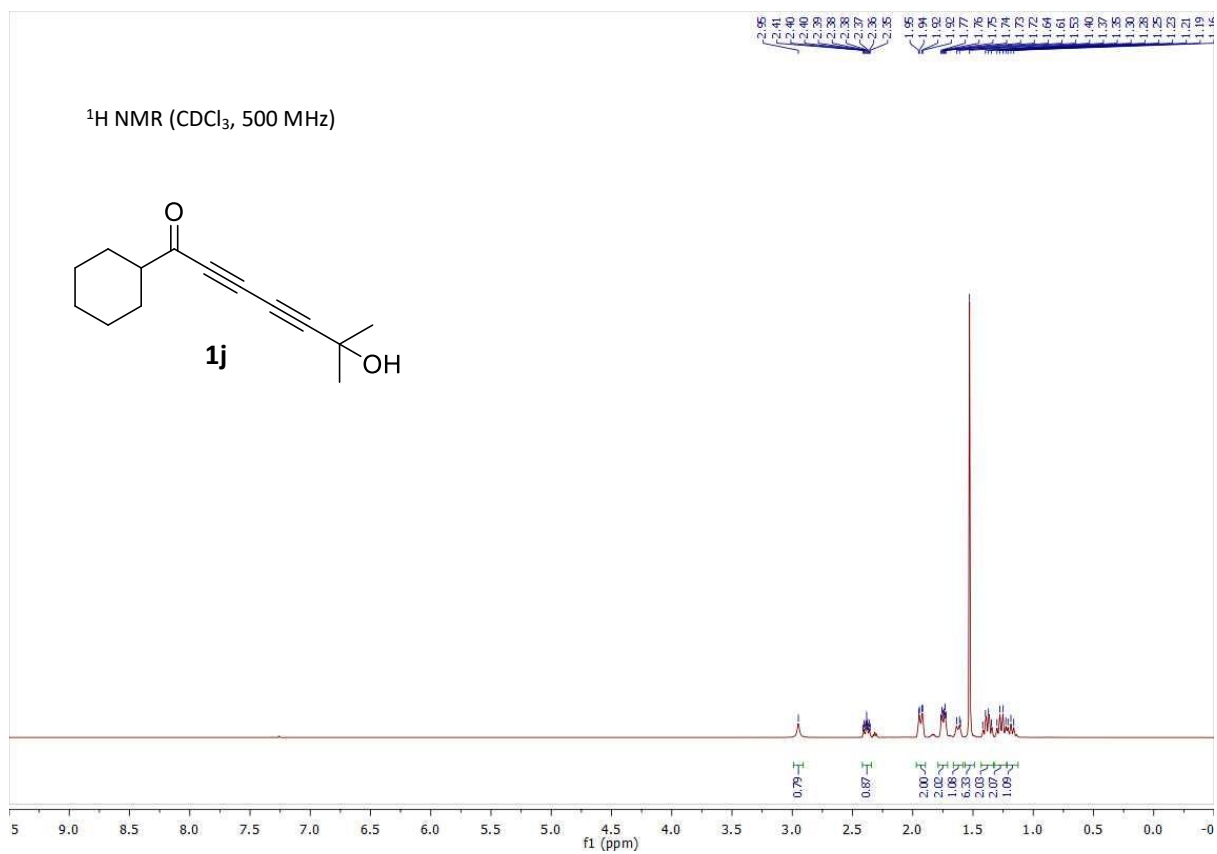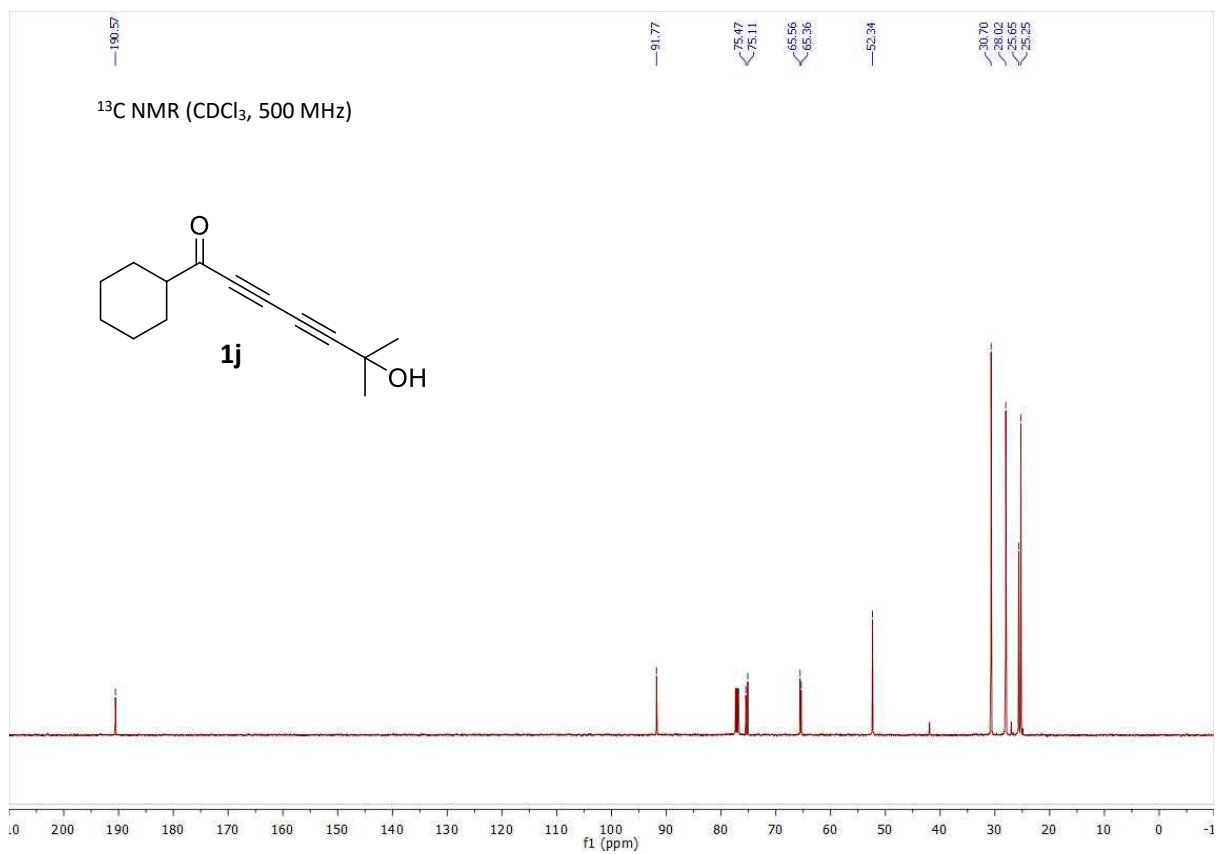

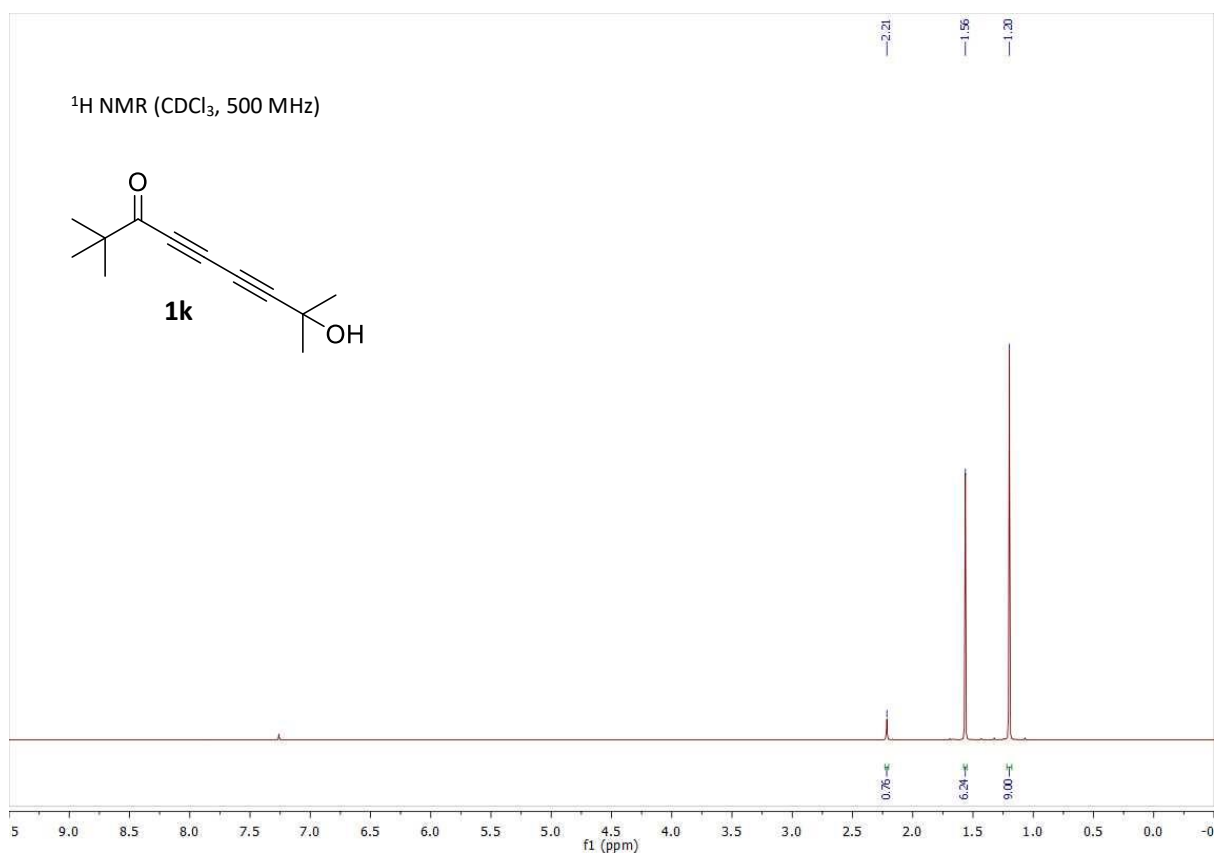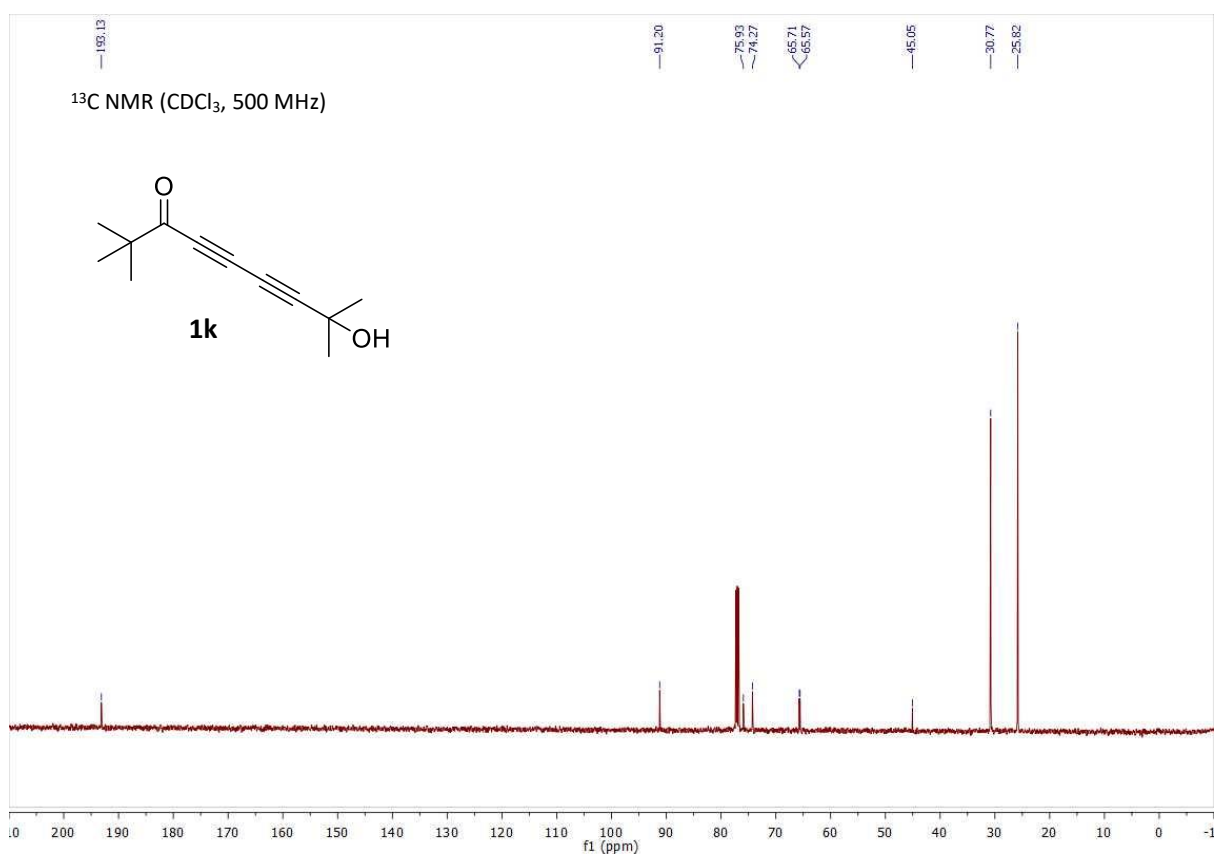

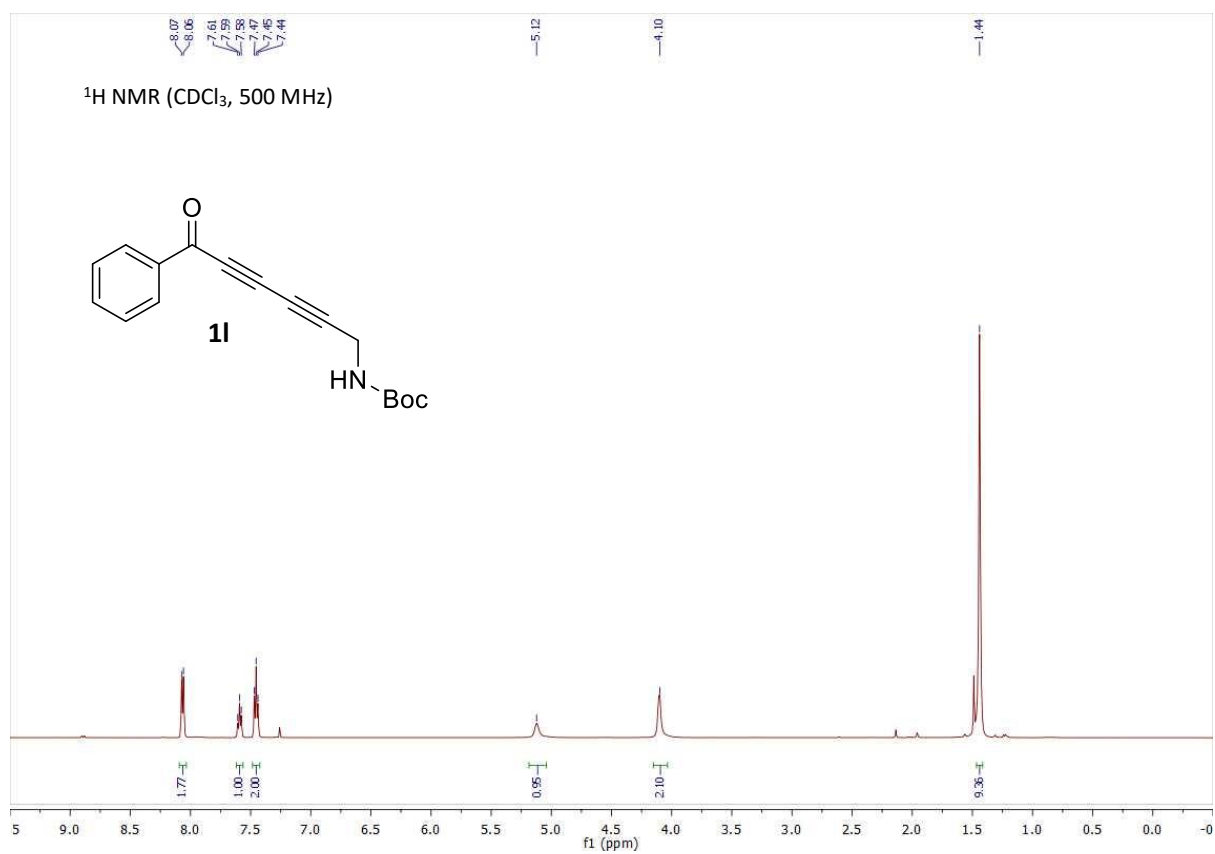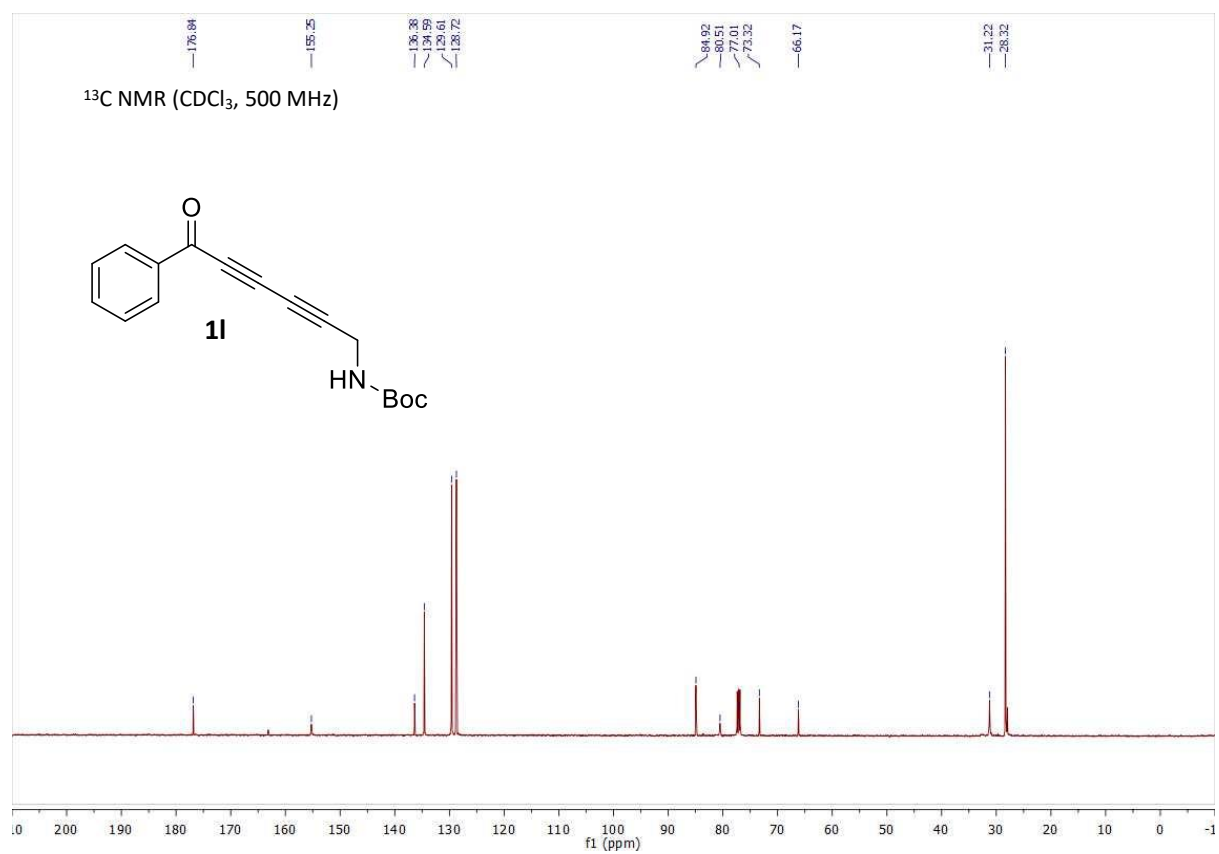

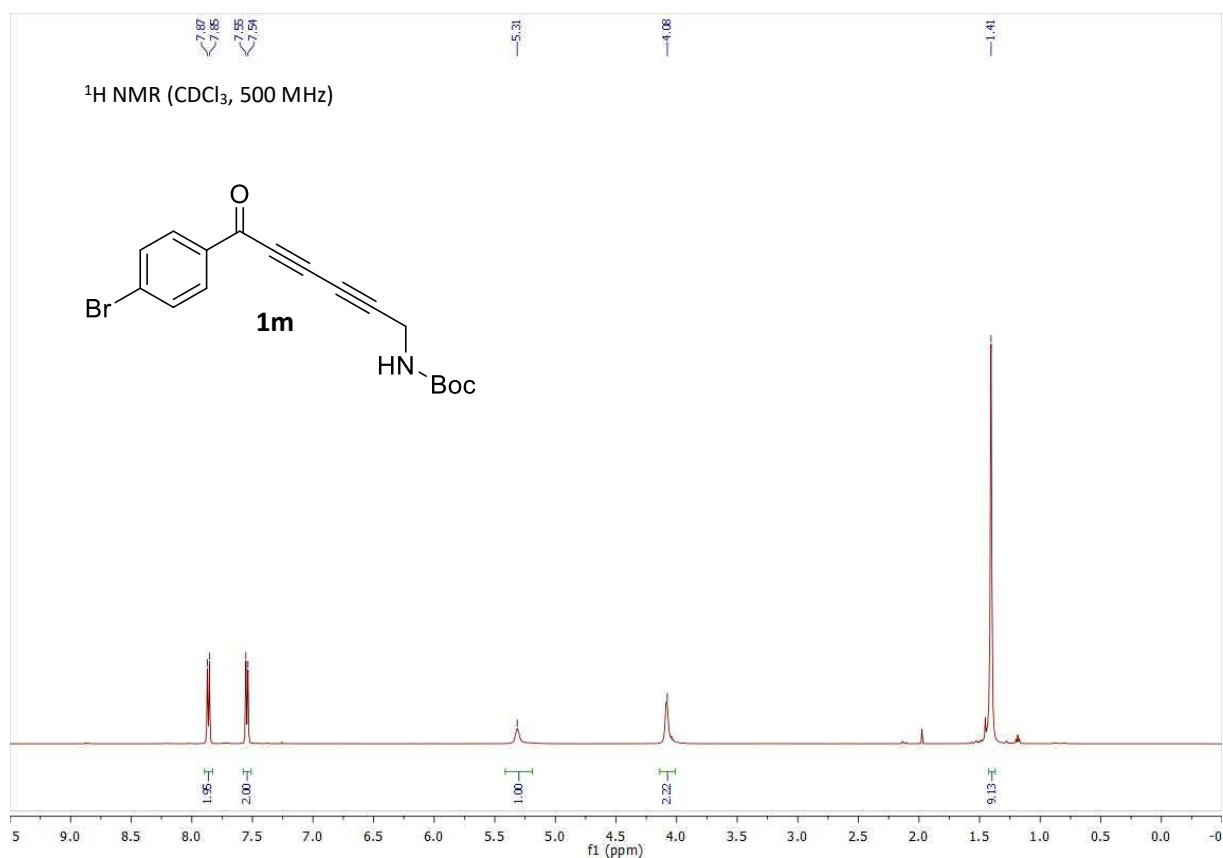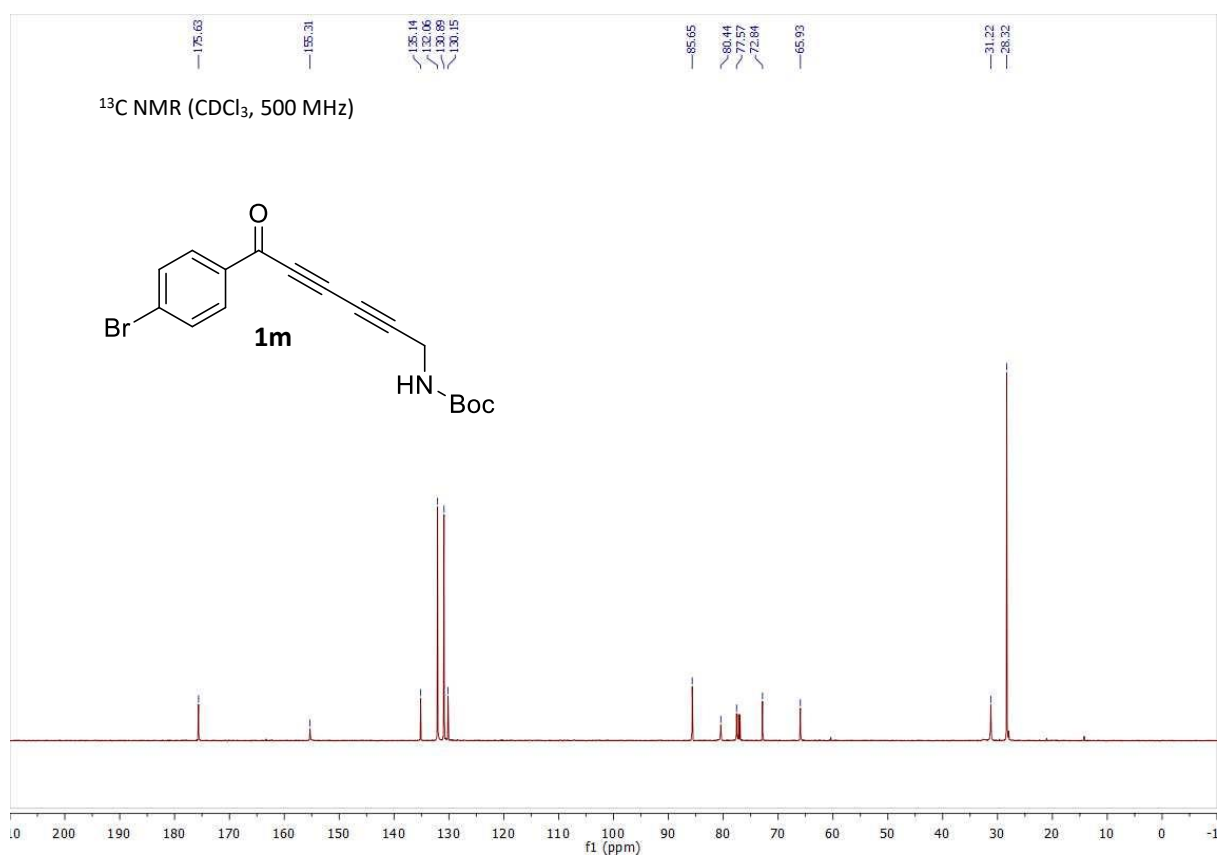

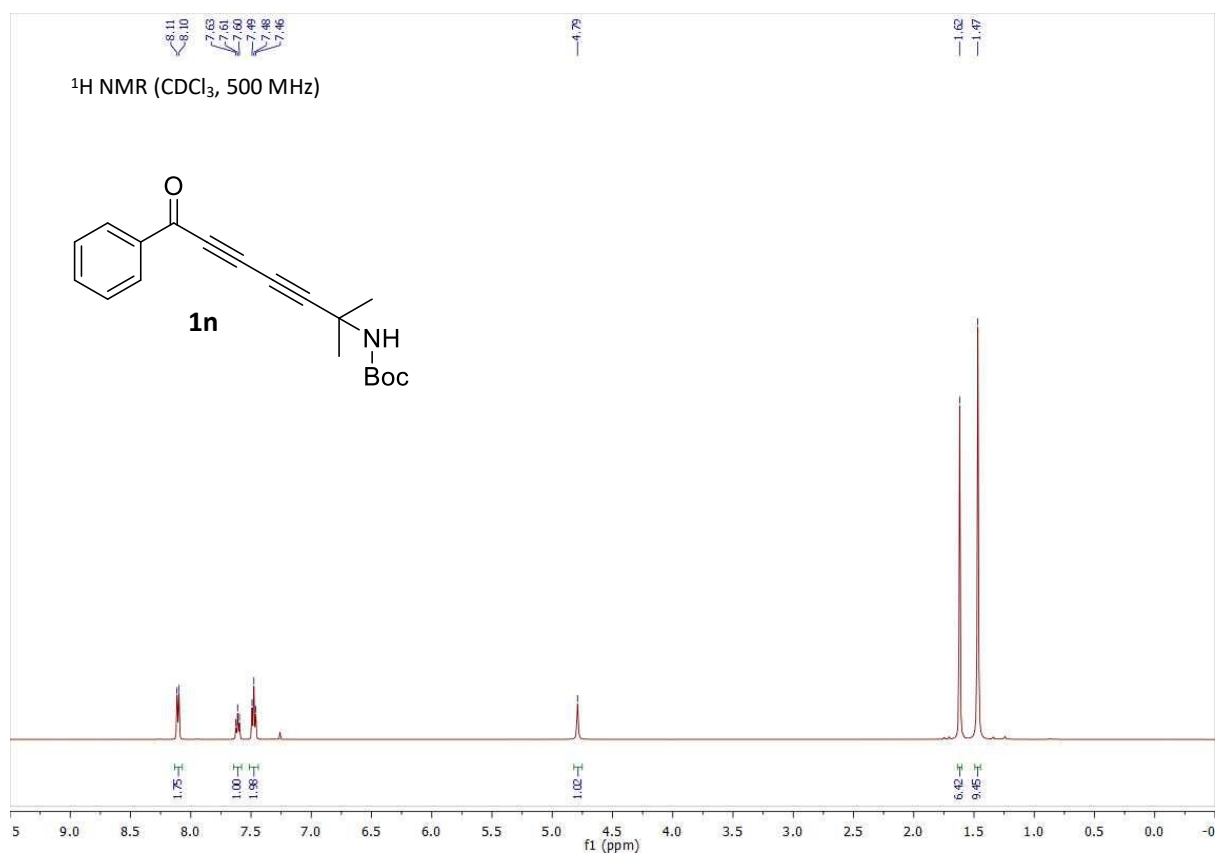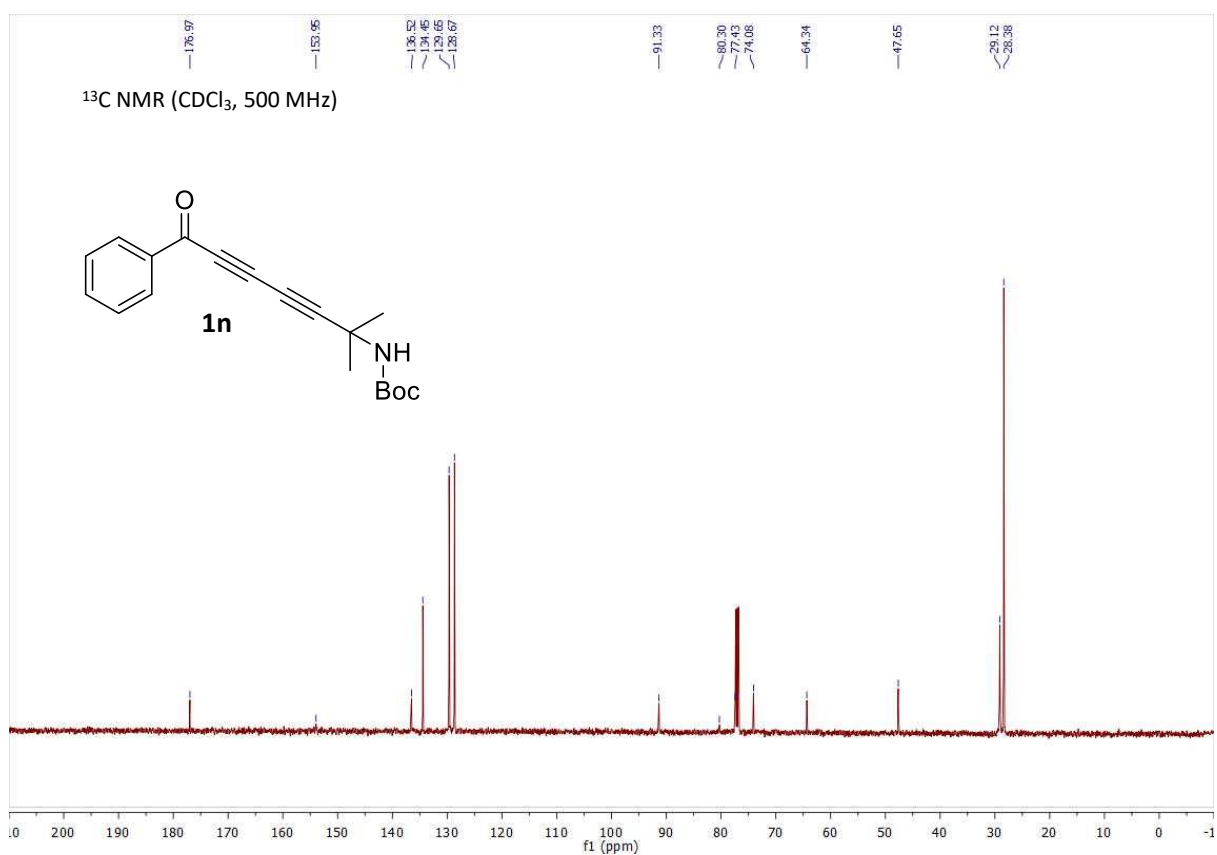



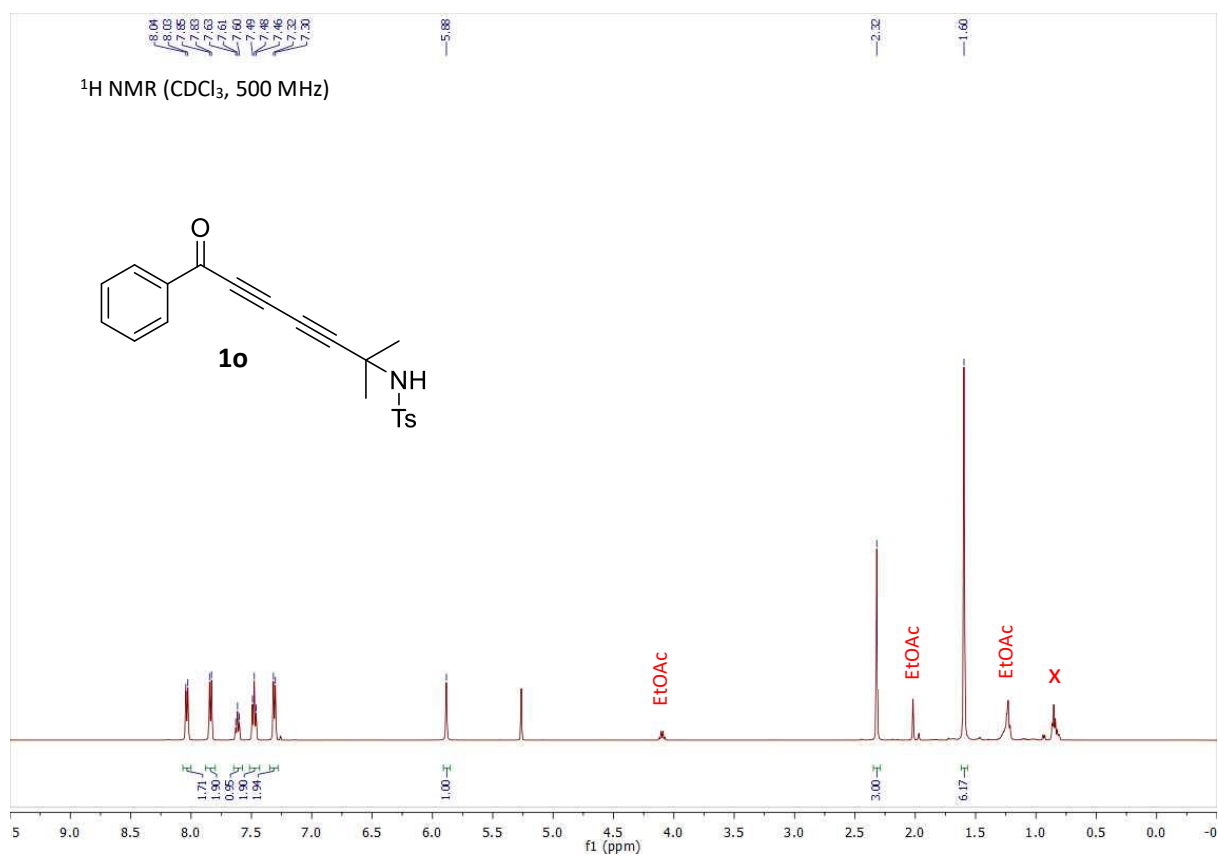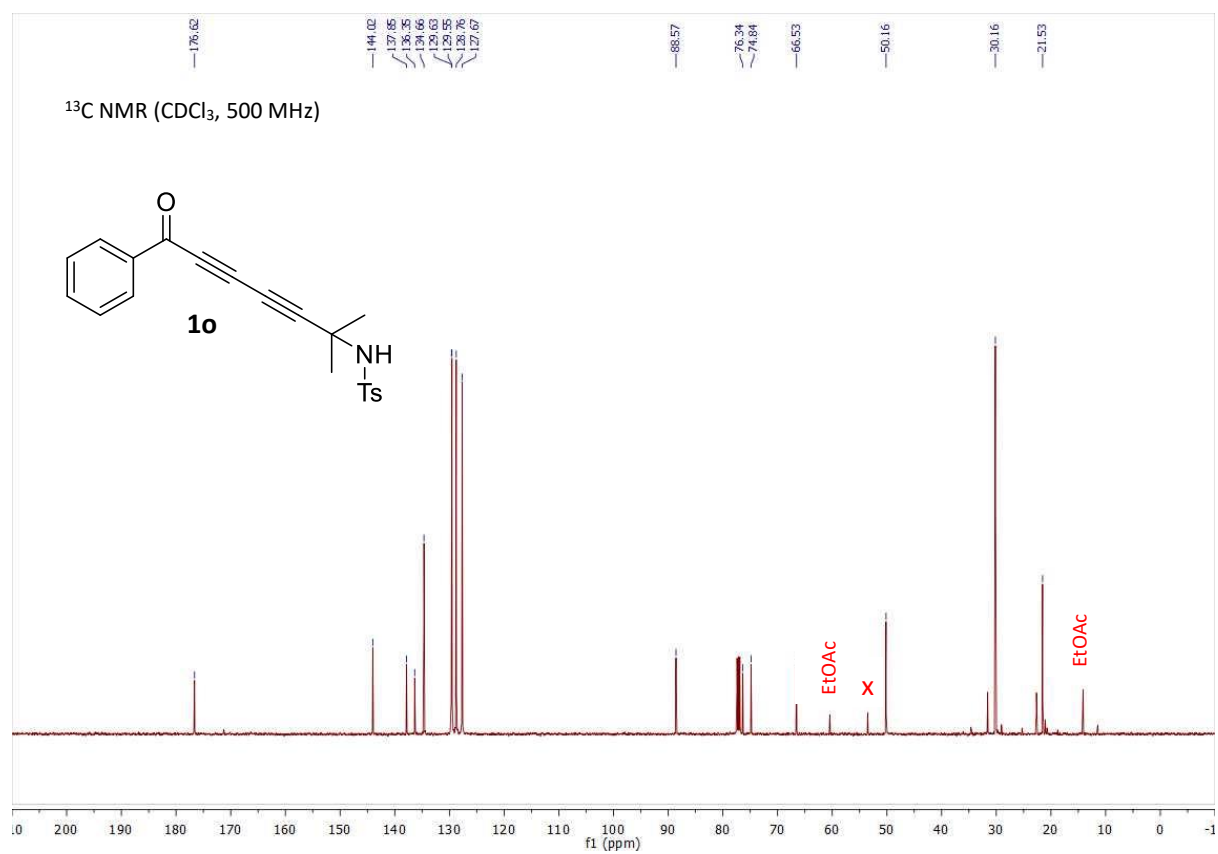

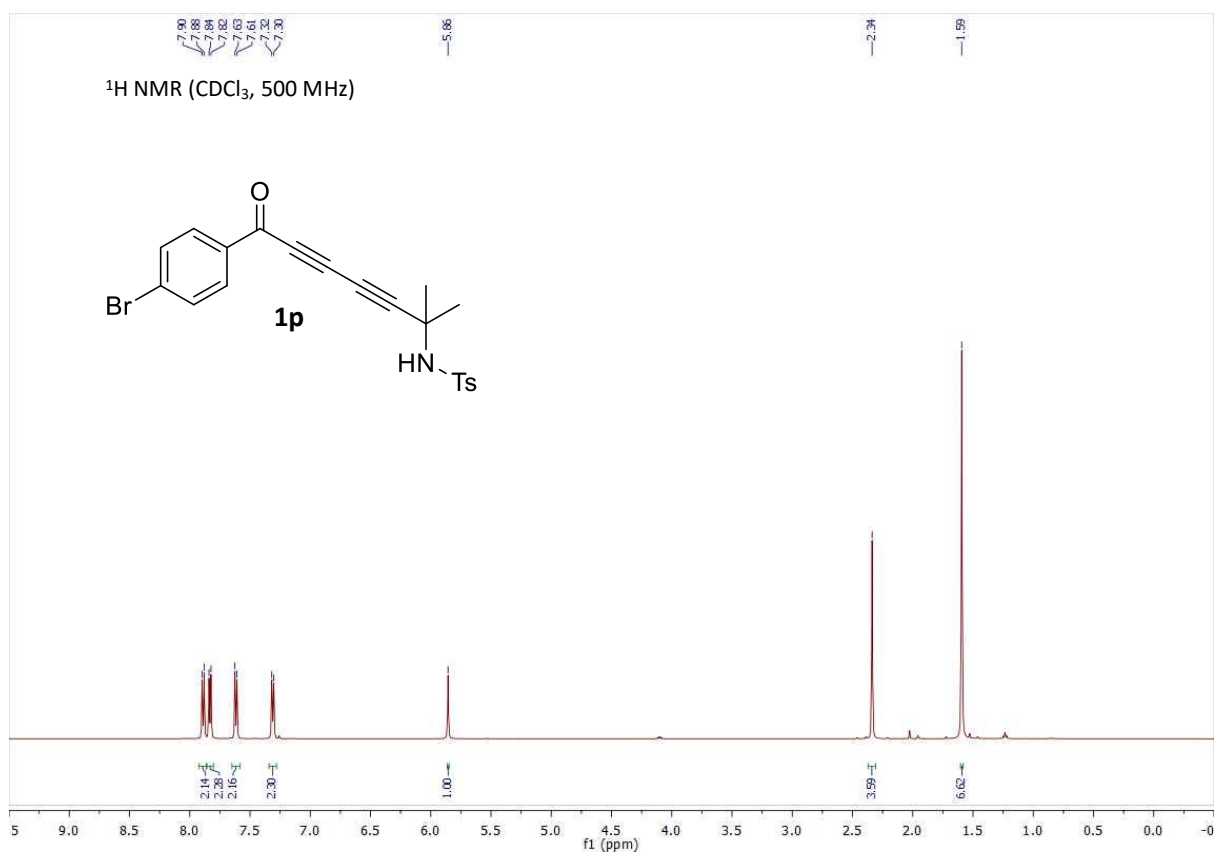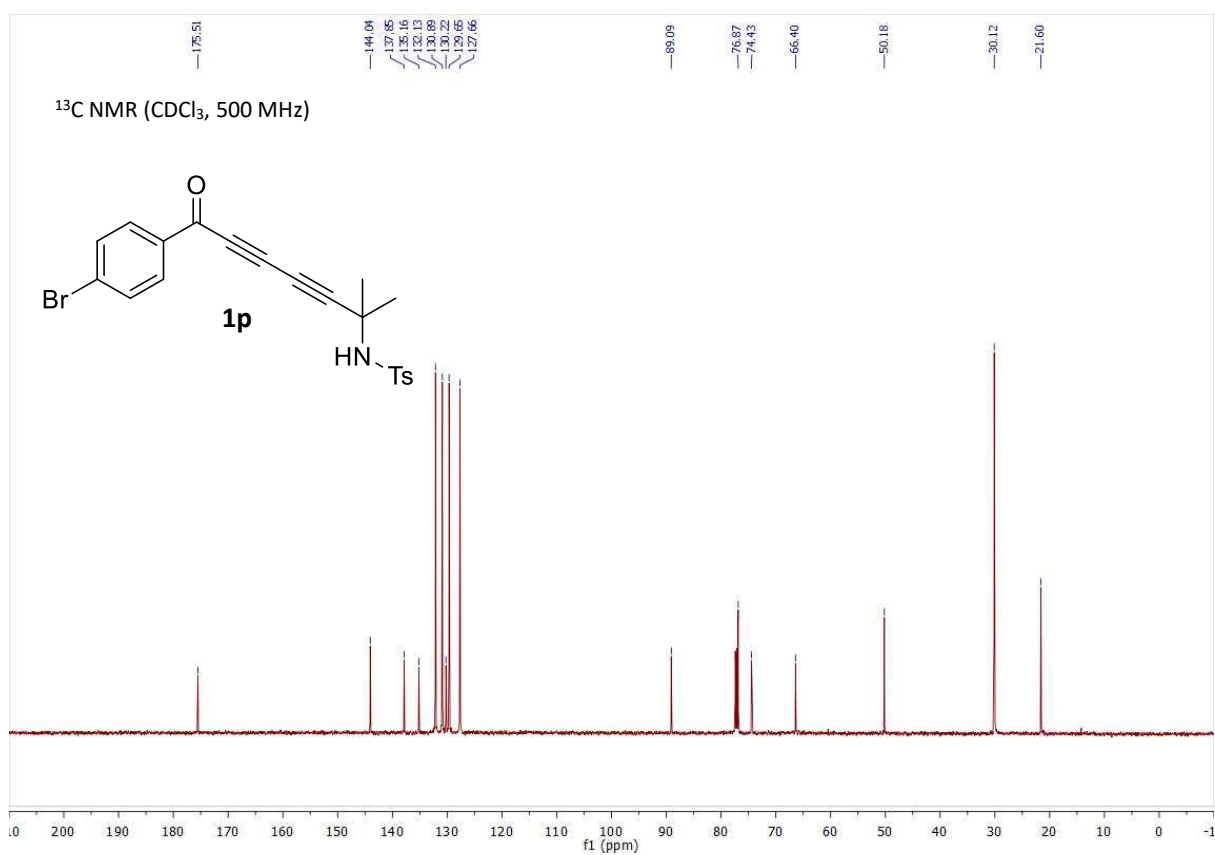

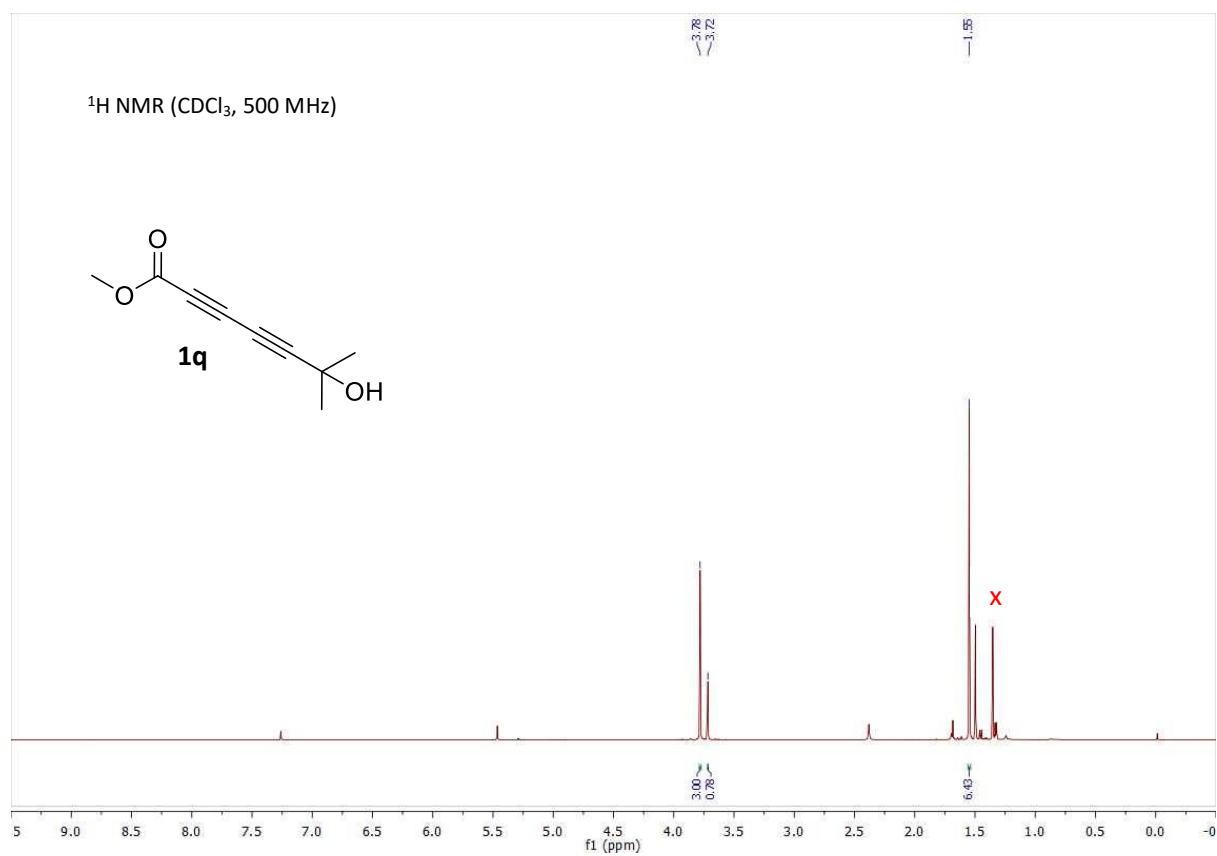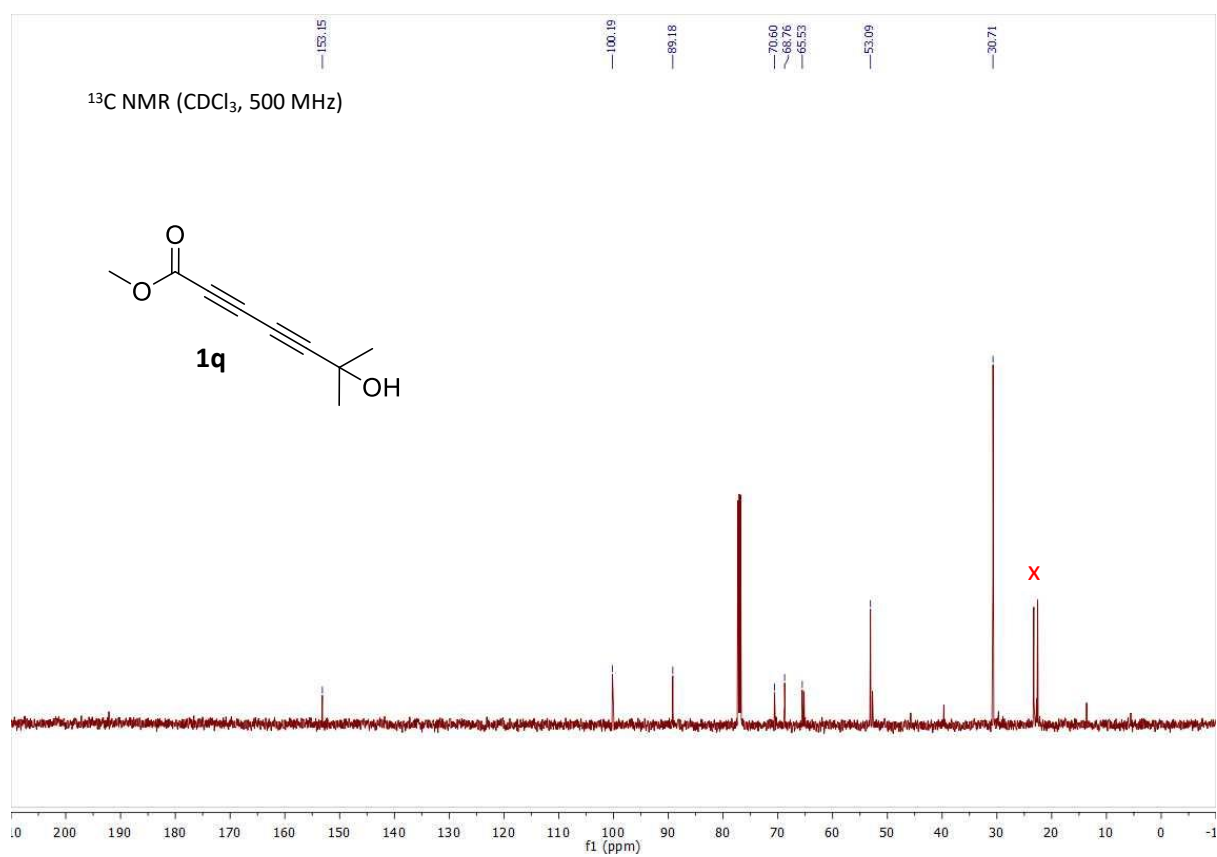

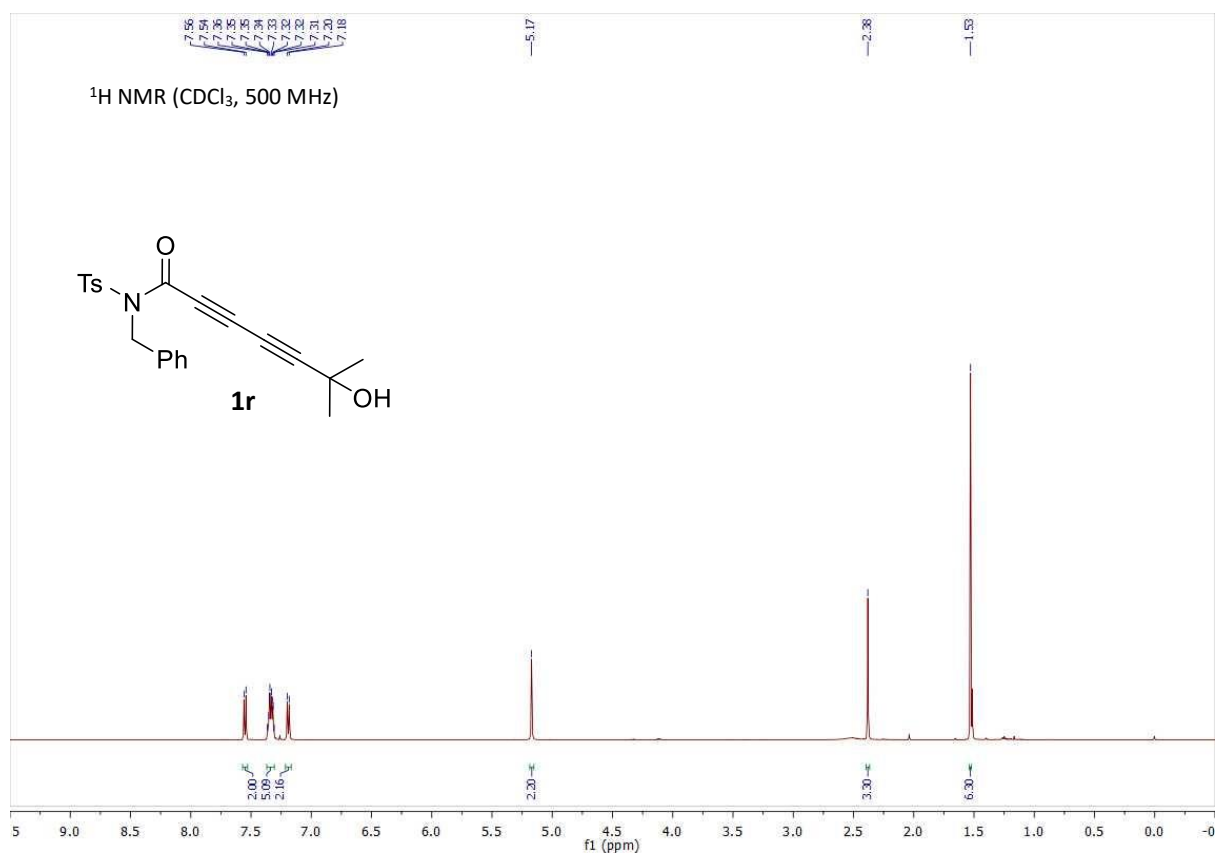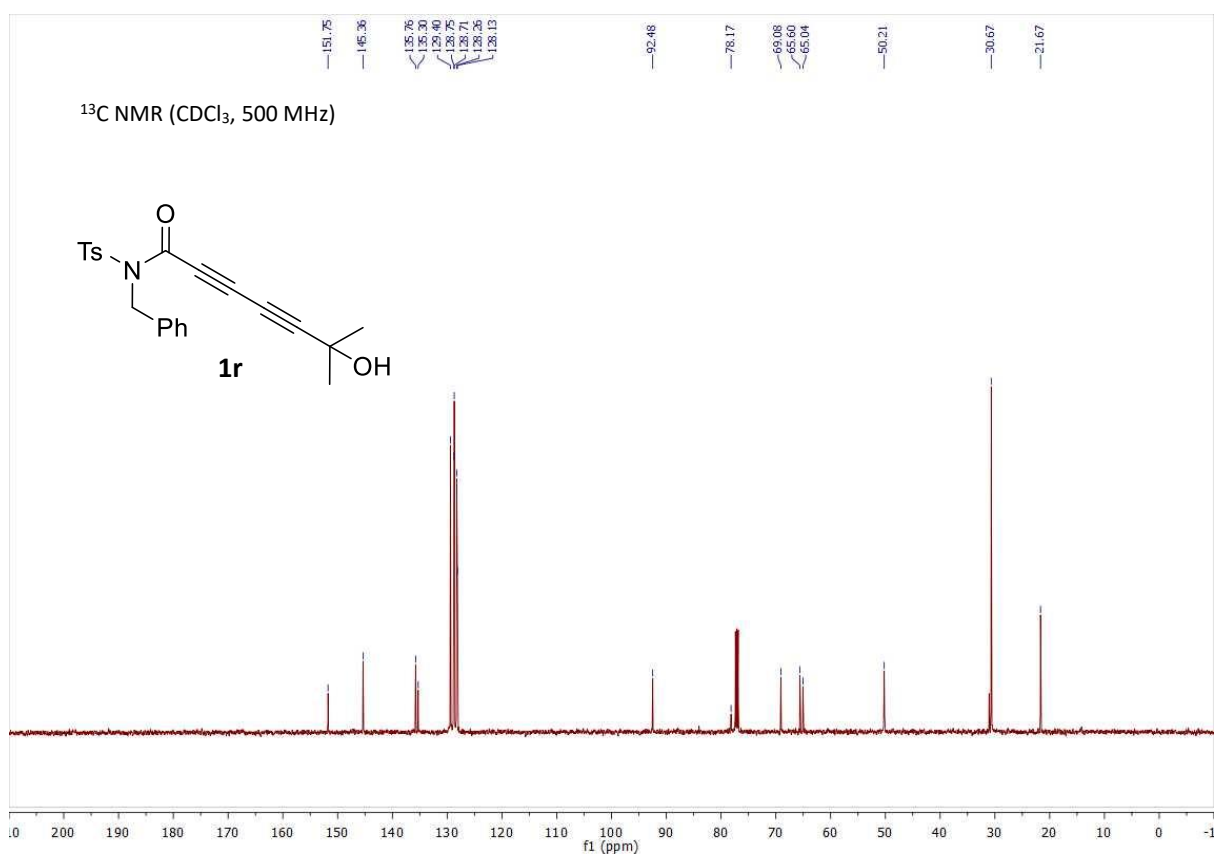

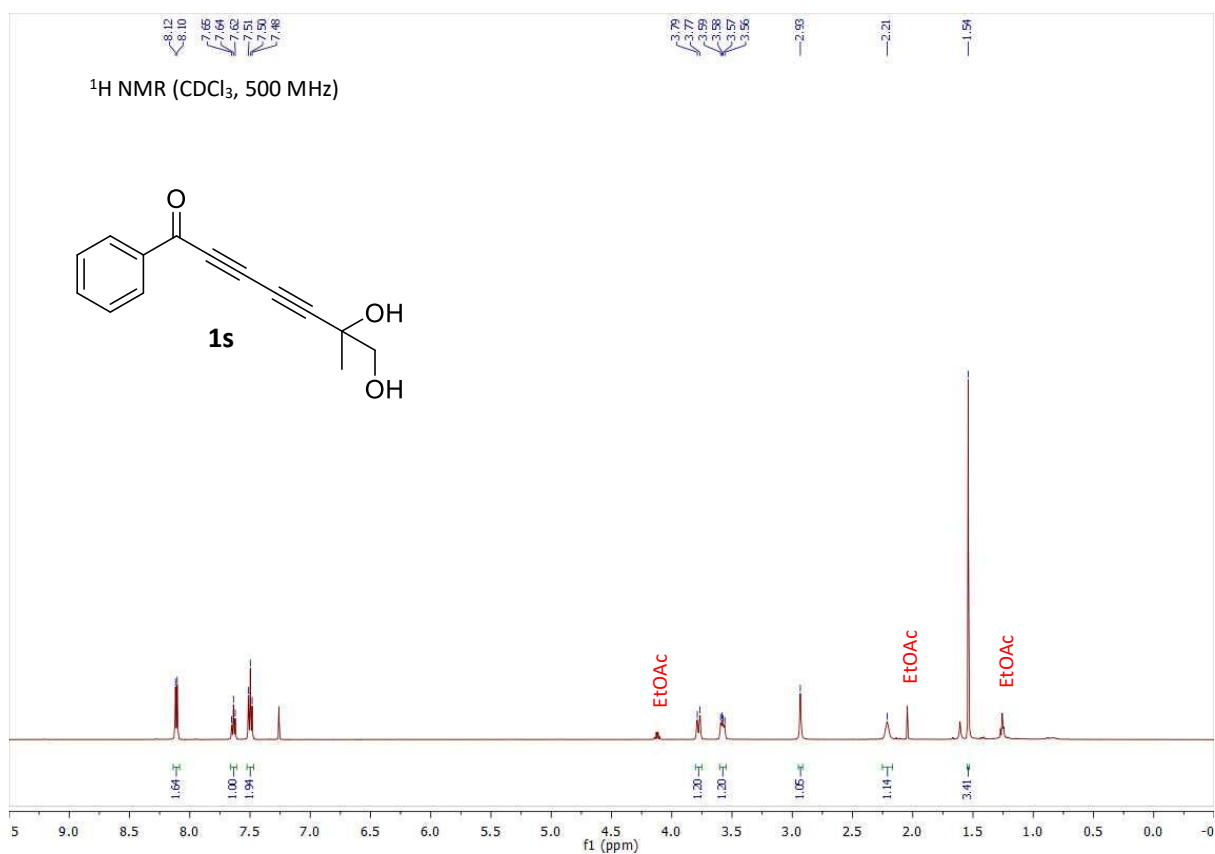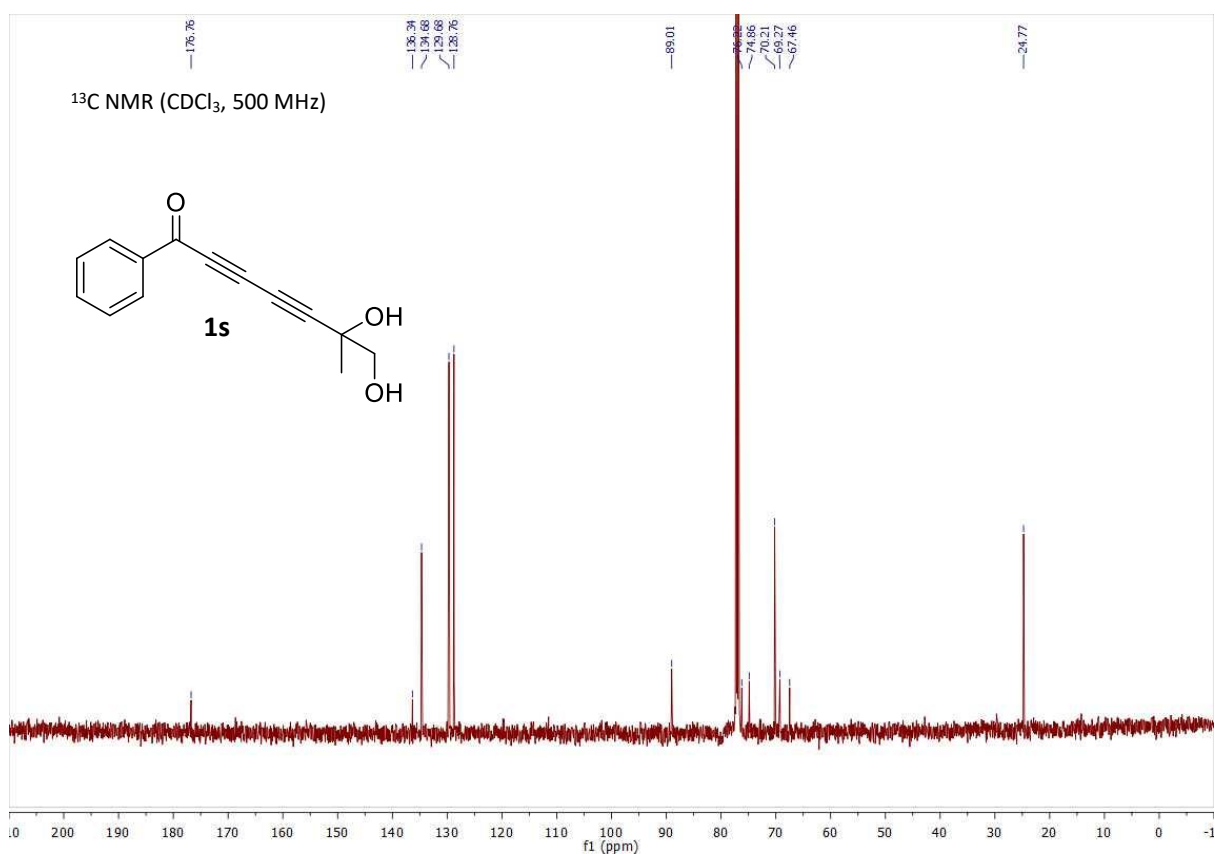

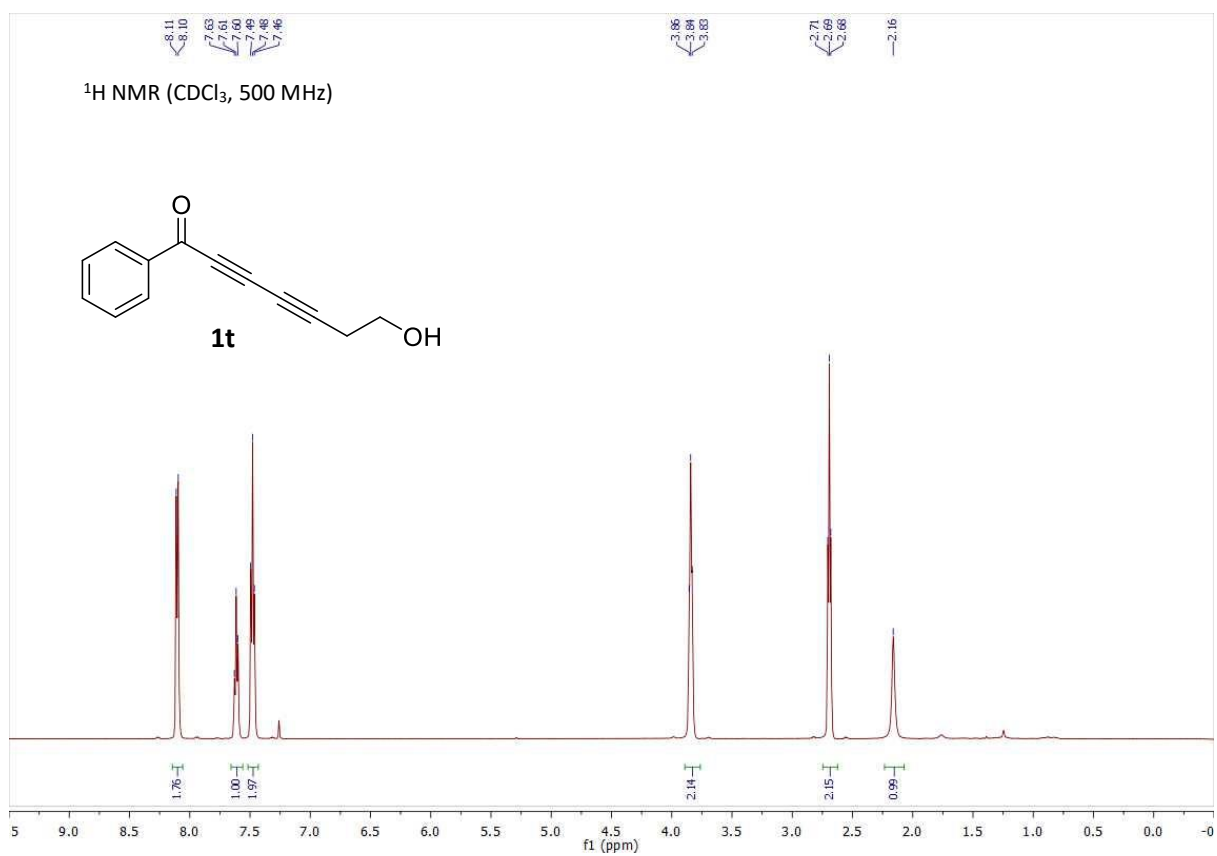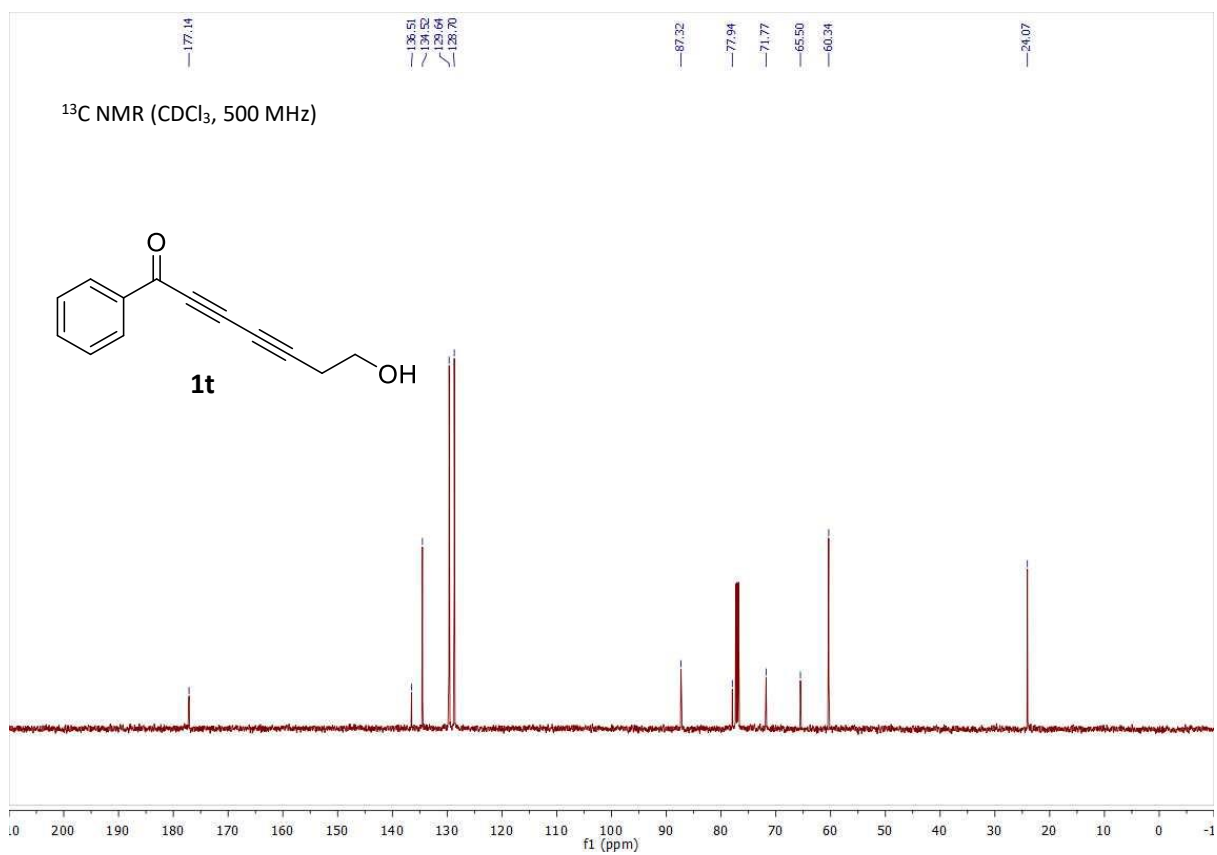

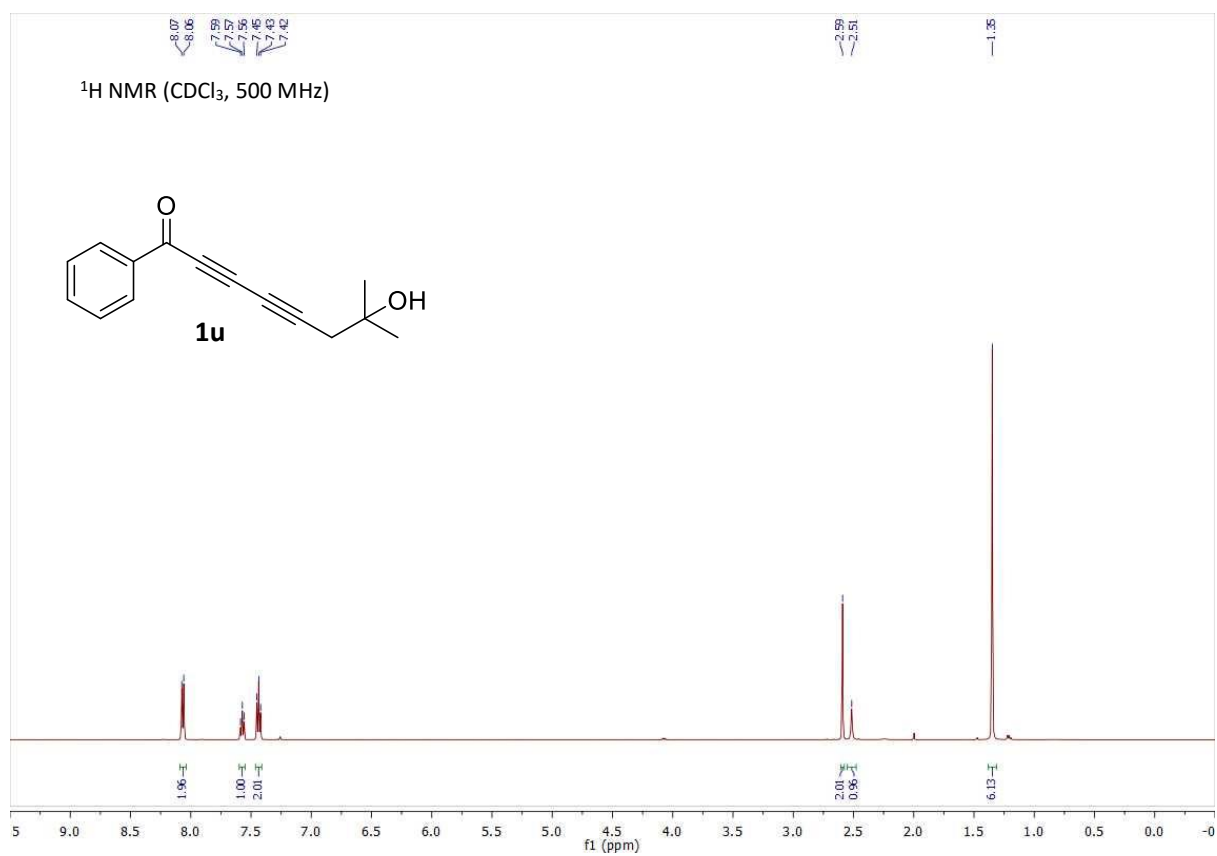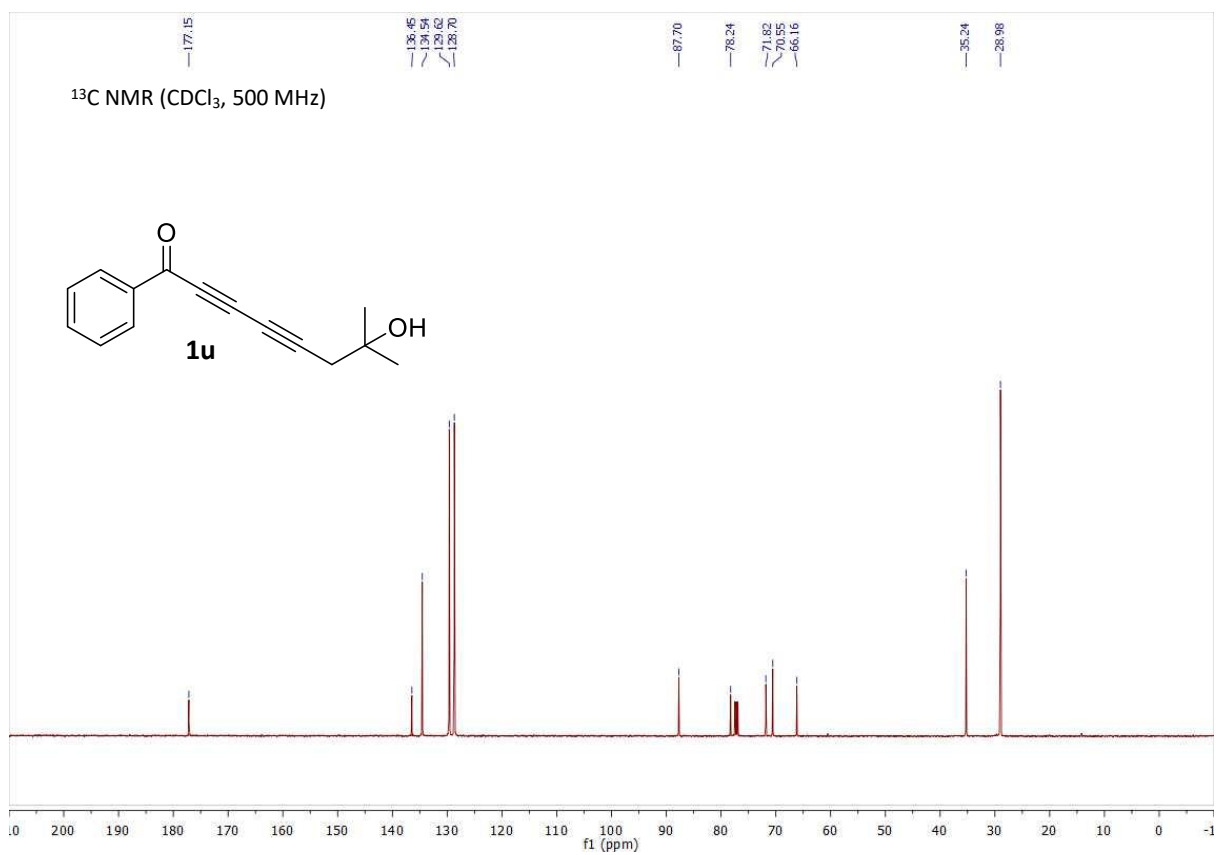

# <sup>1</sup>H and <sup>13</sup>C NMR Spectra of Products

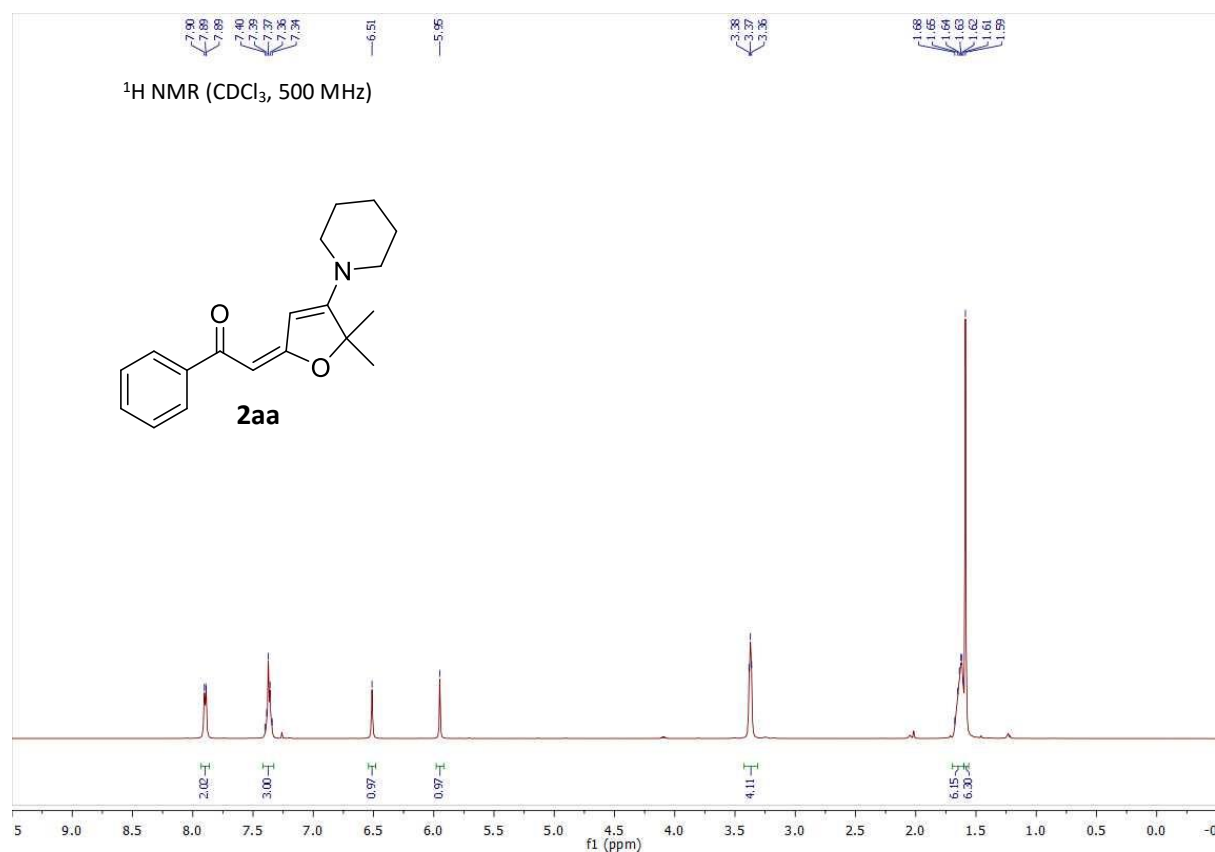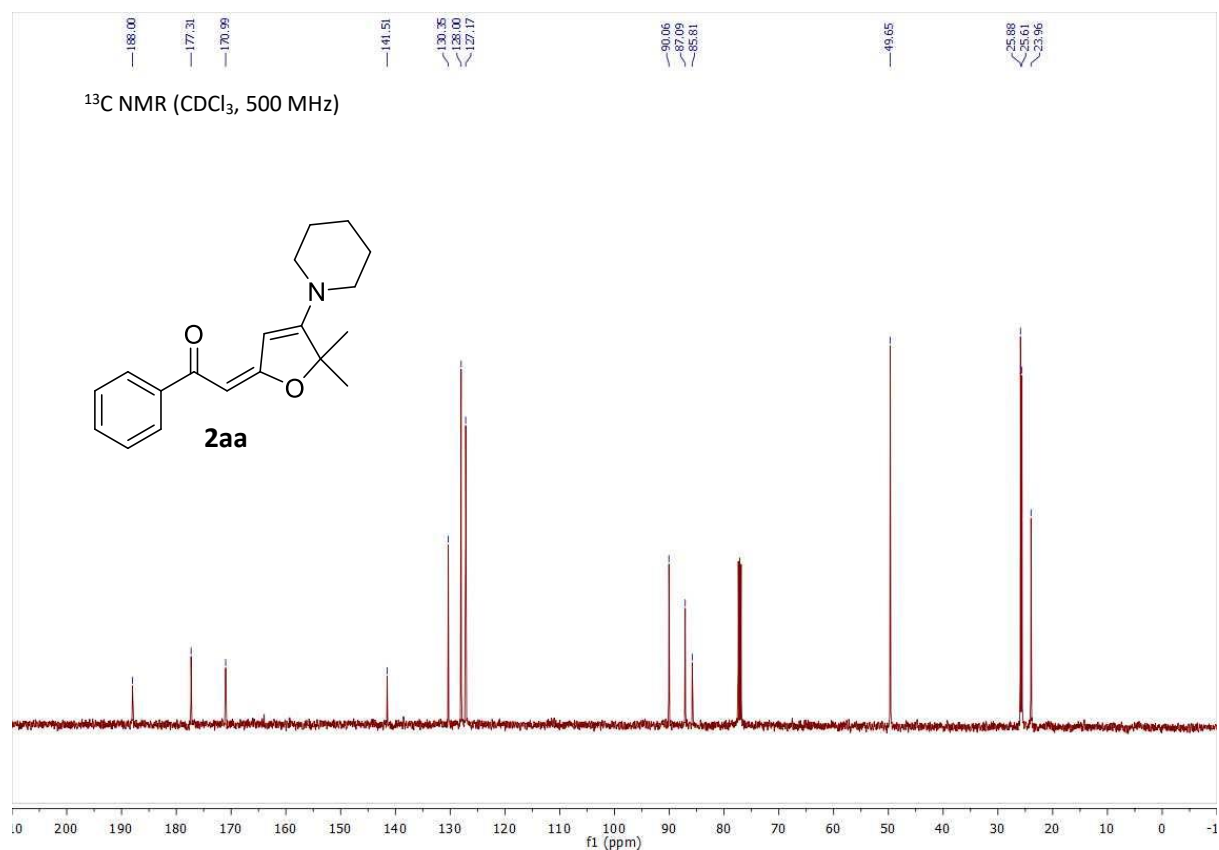



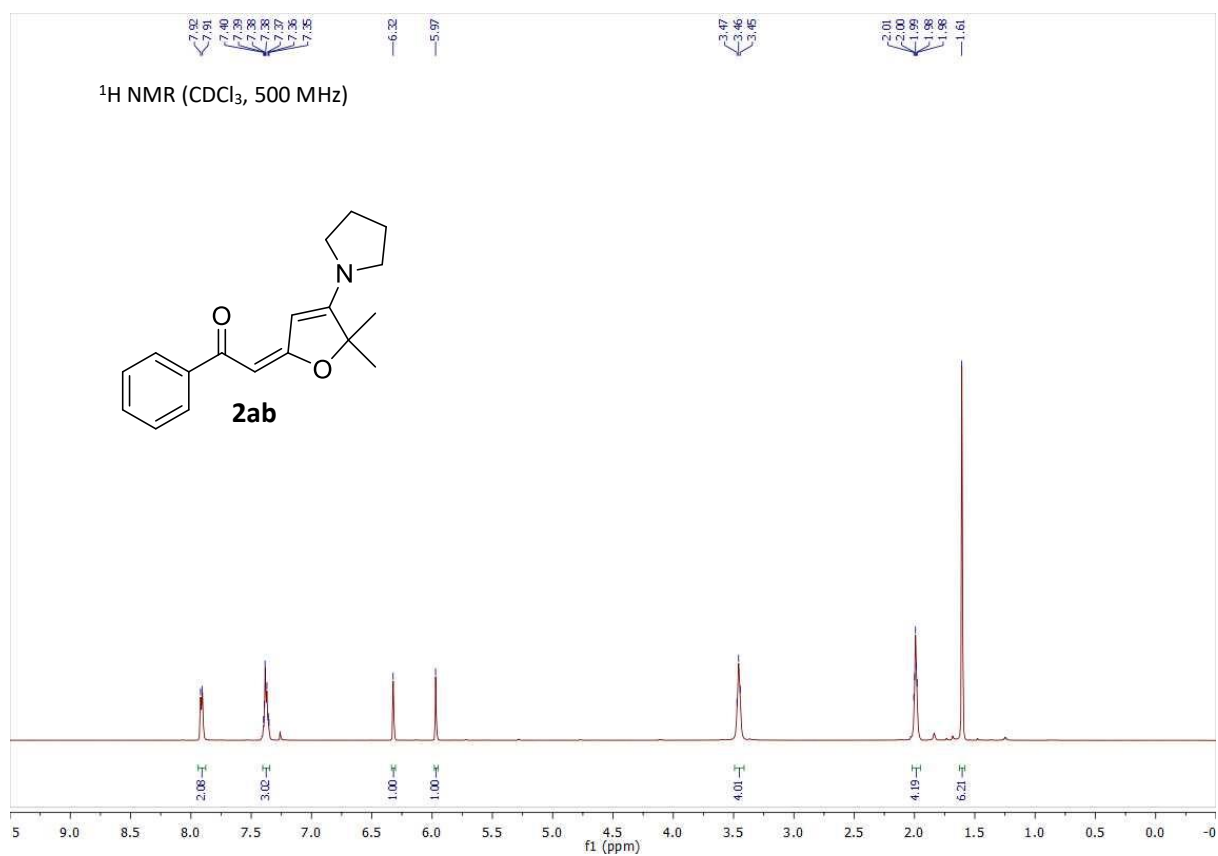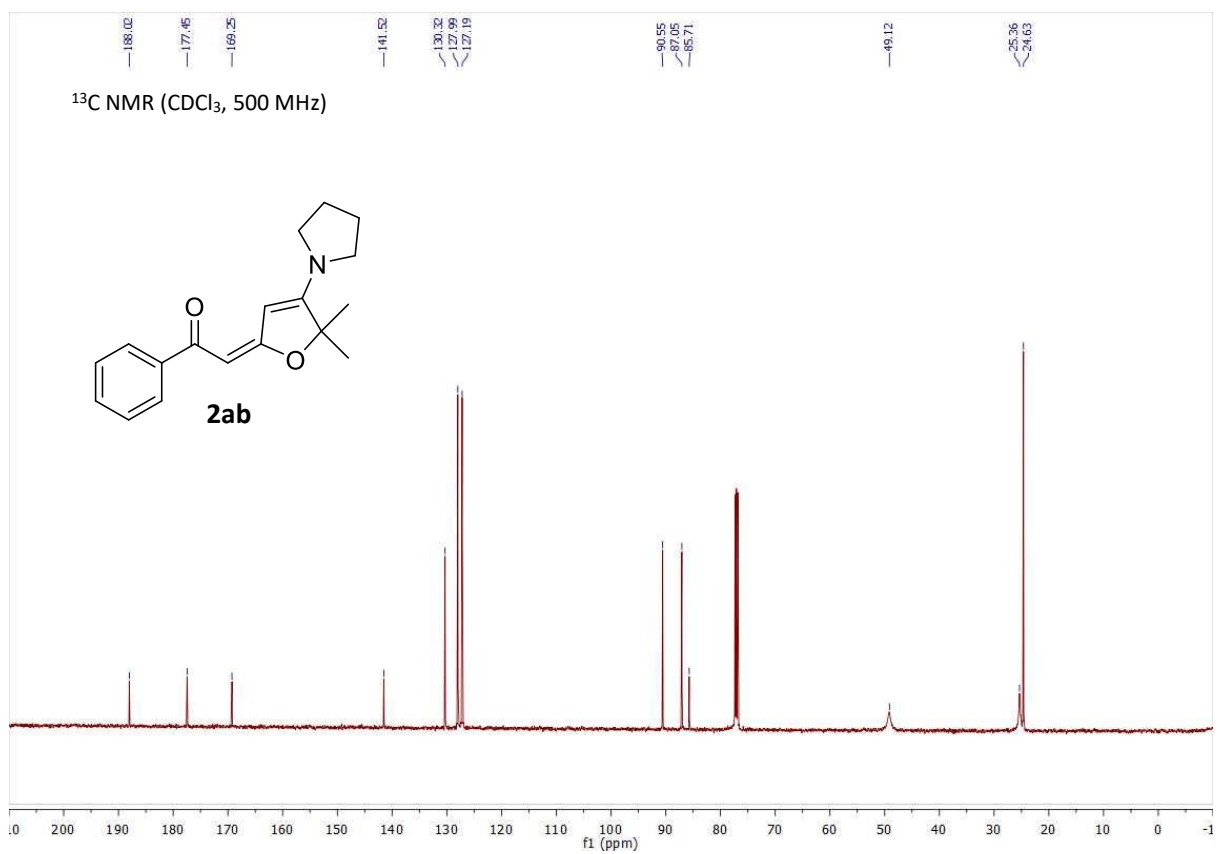

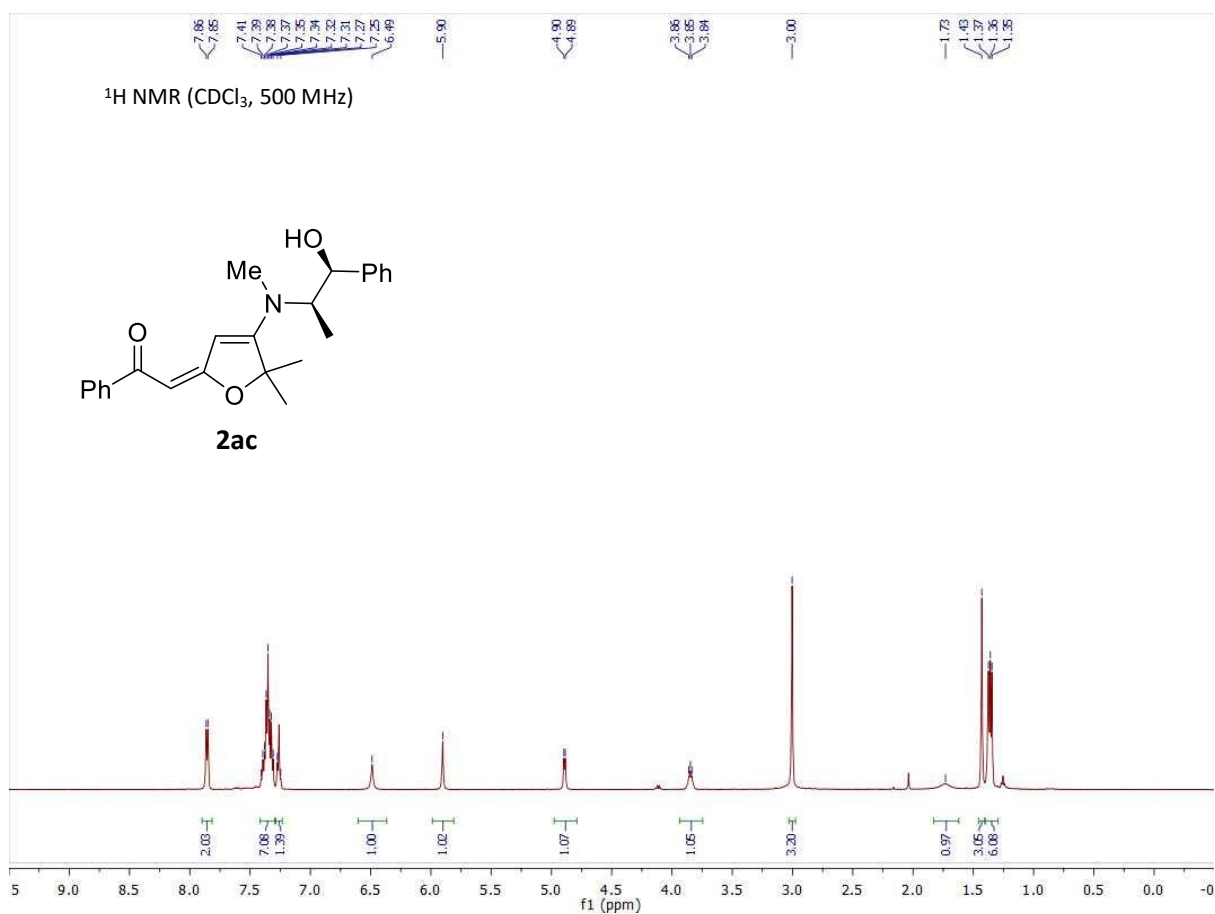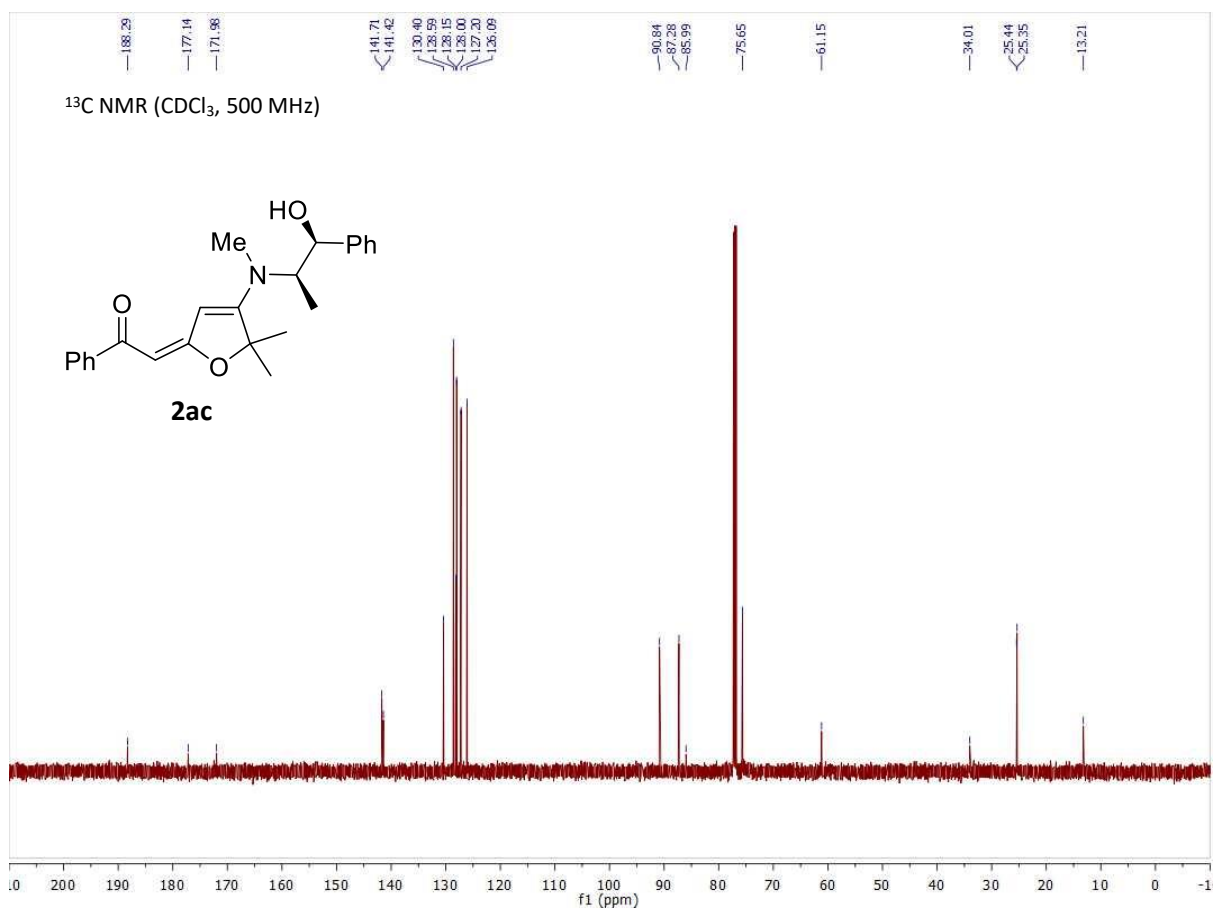

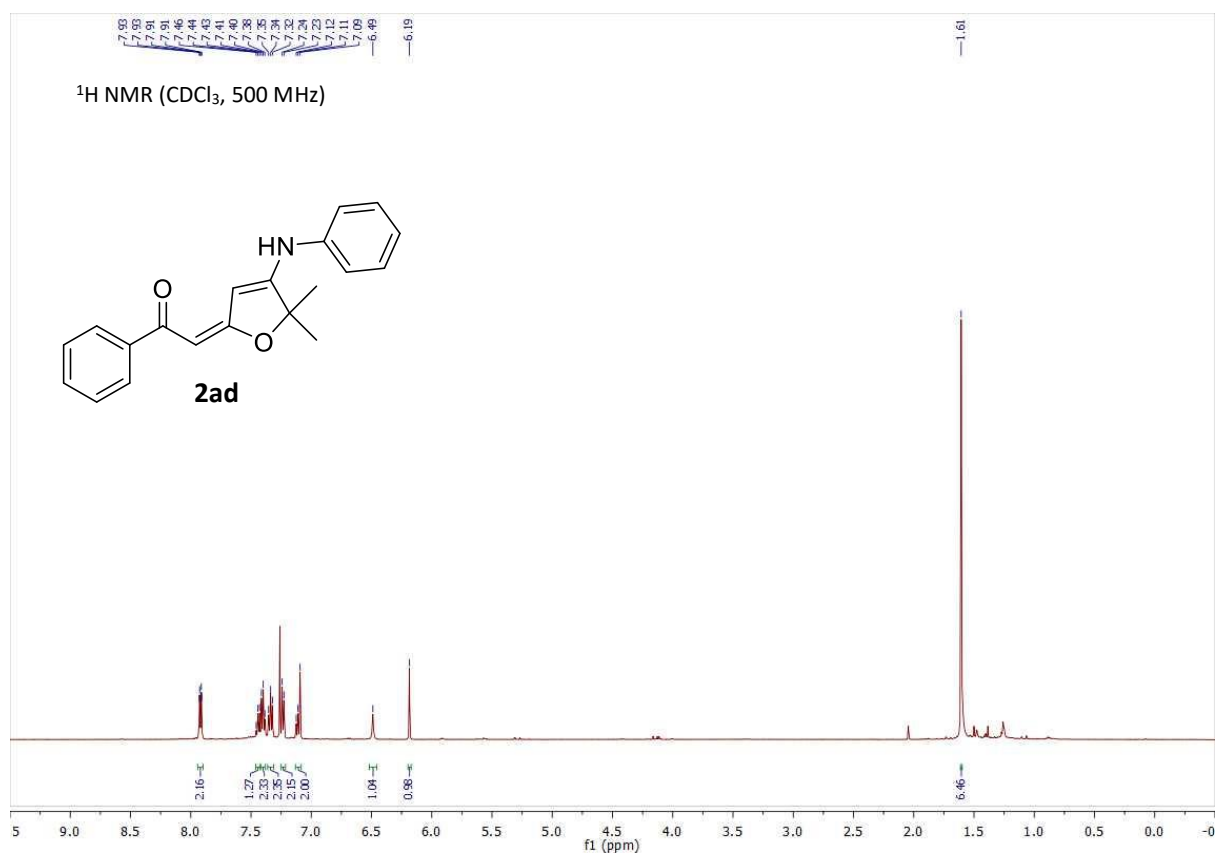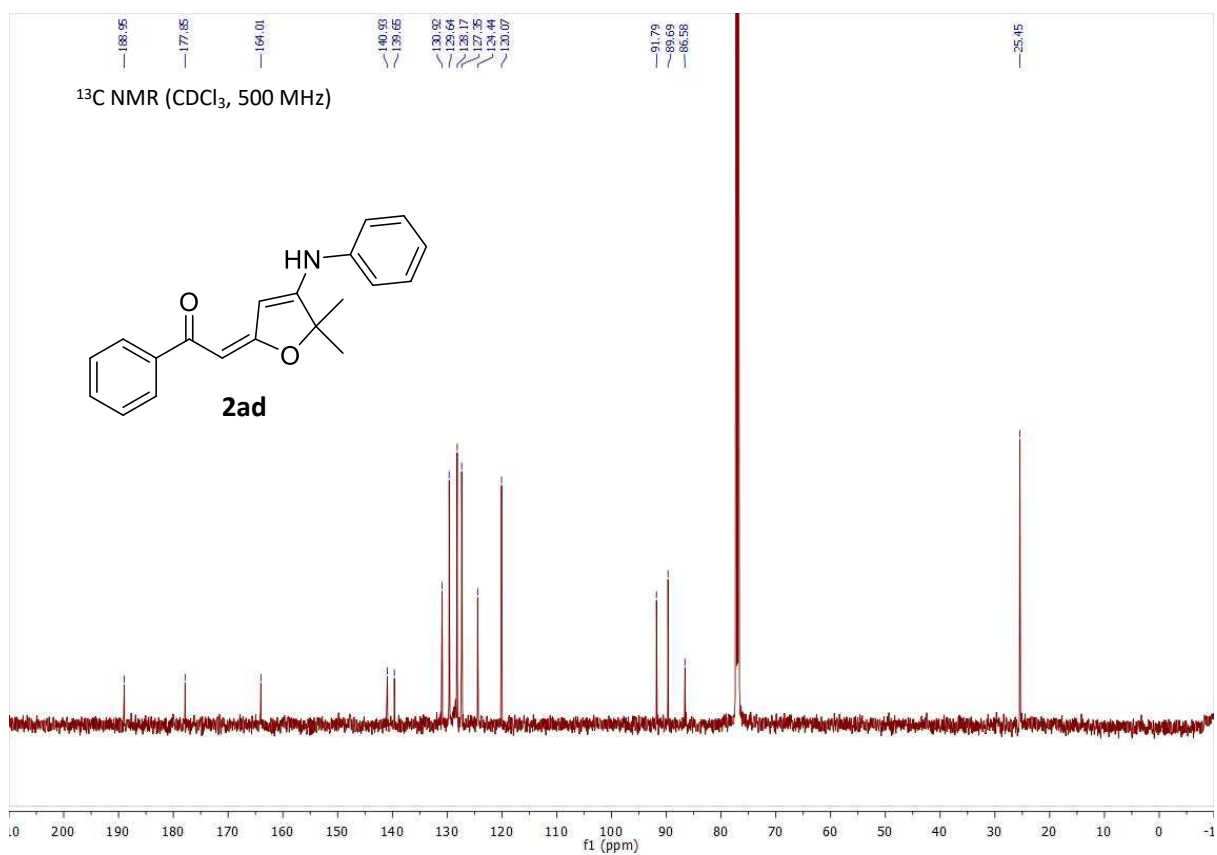

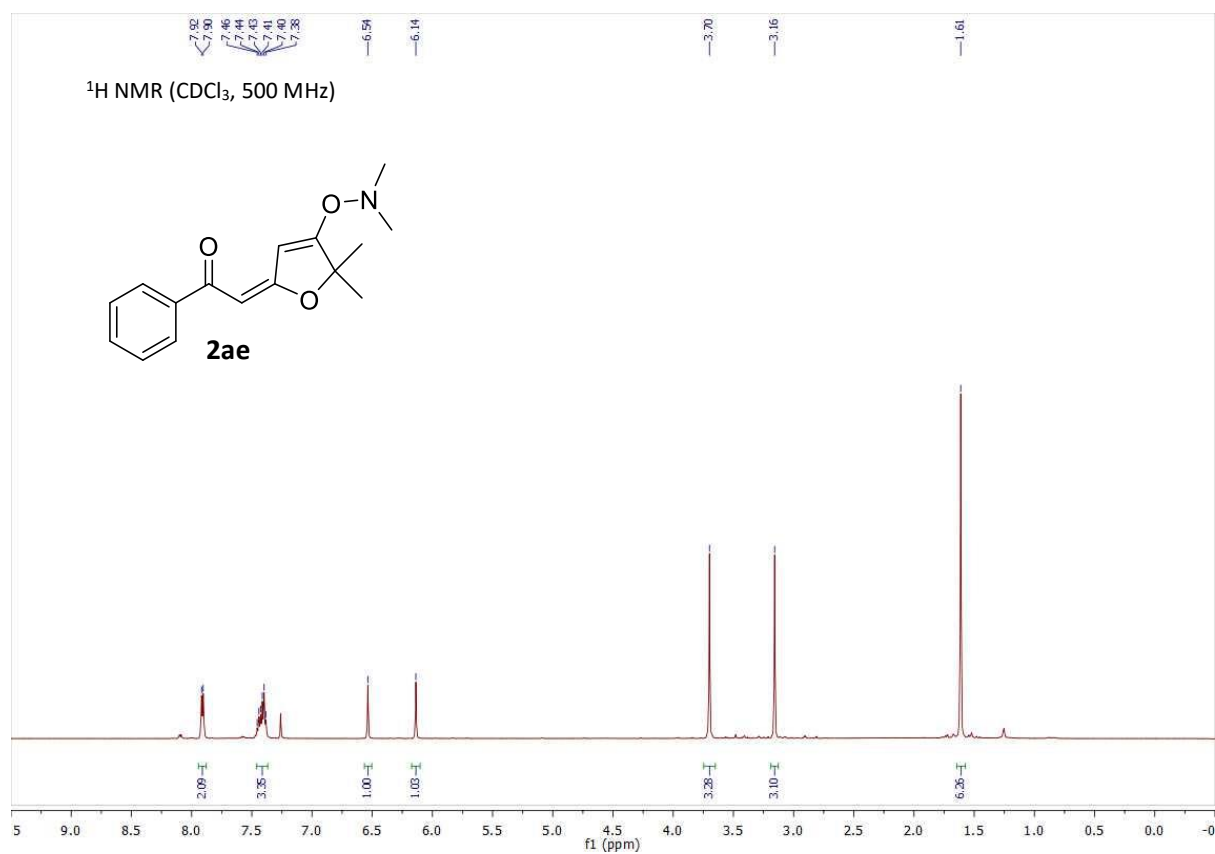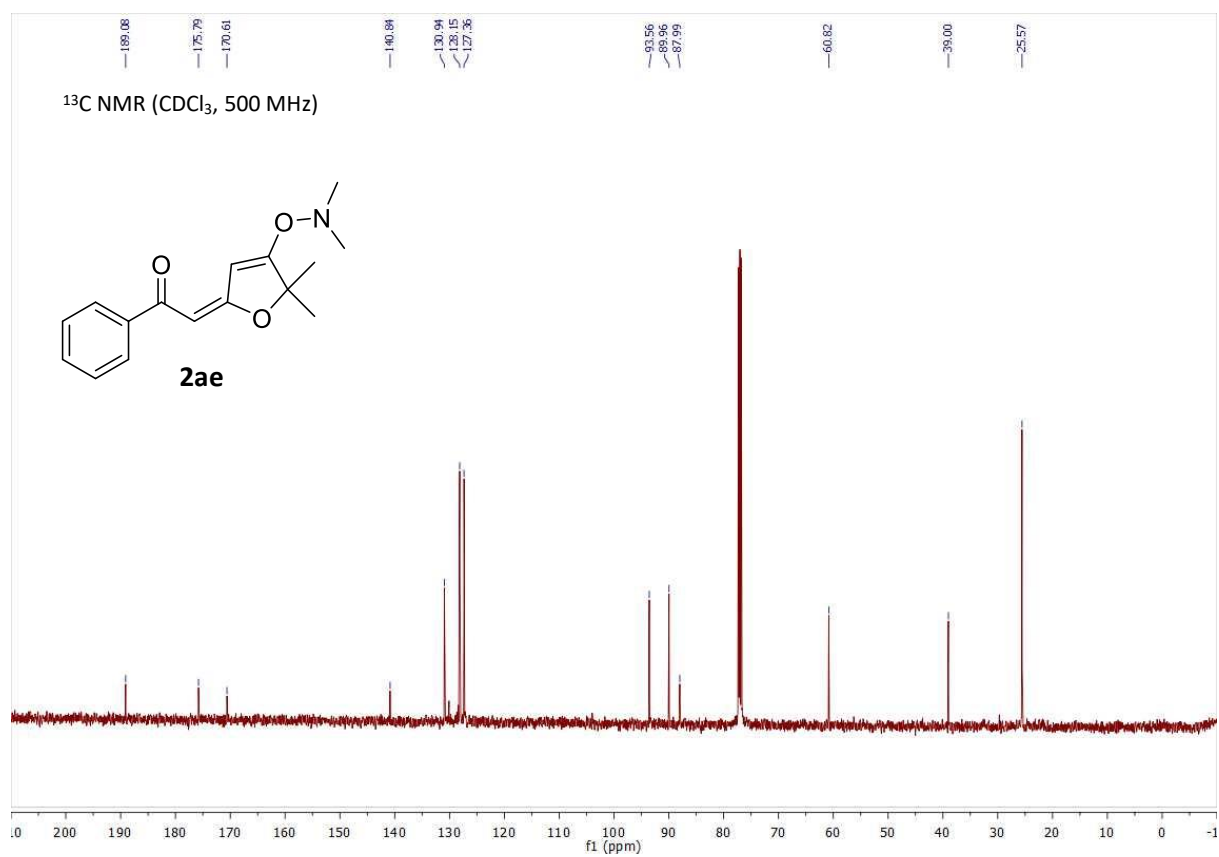

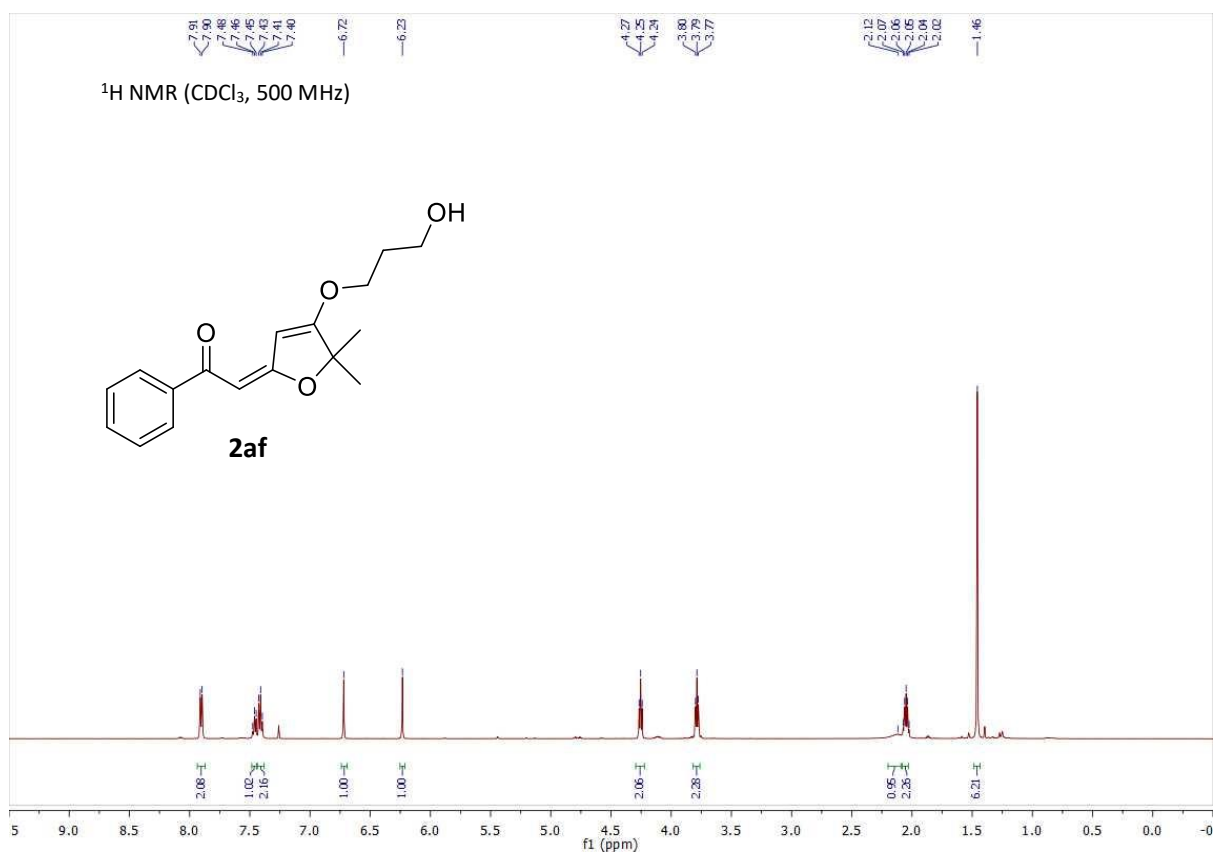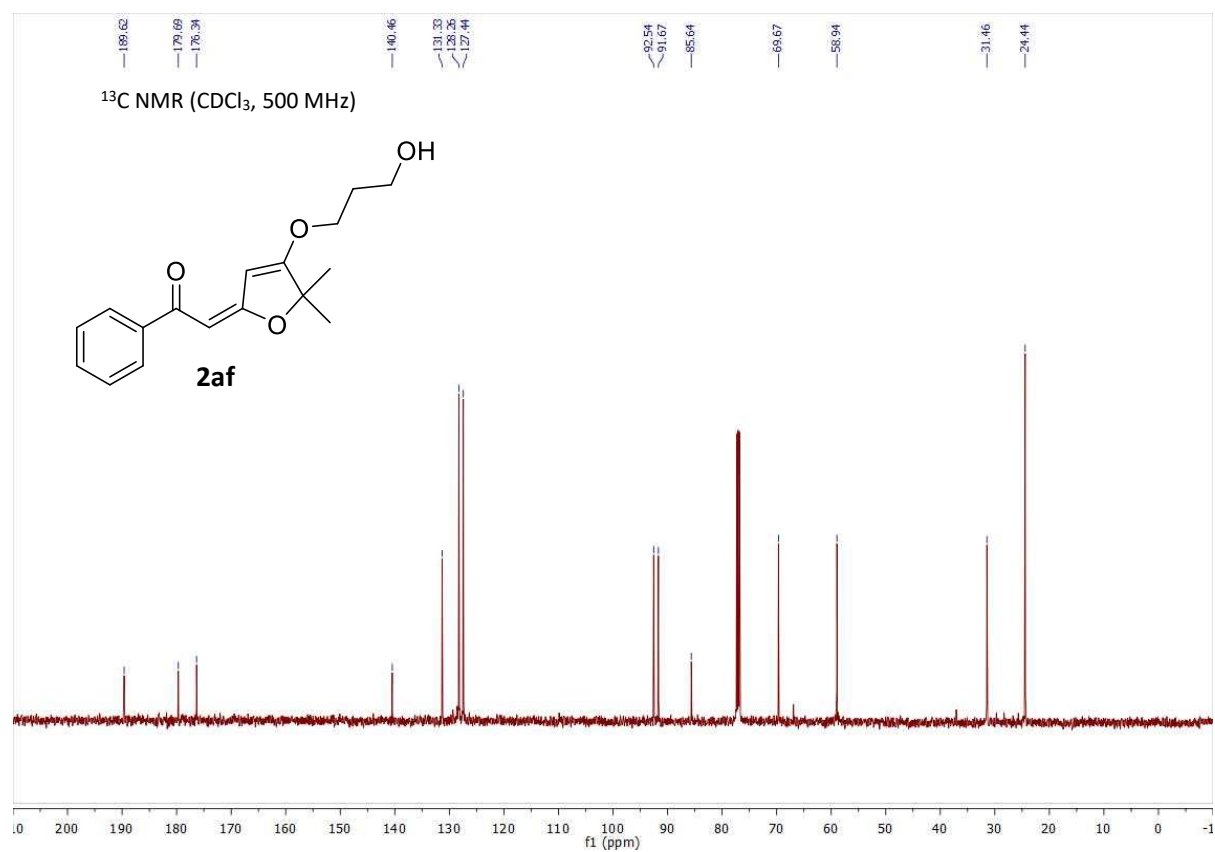

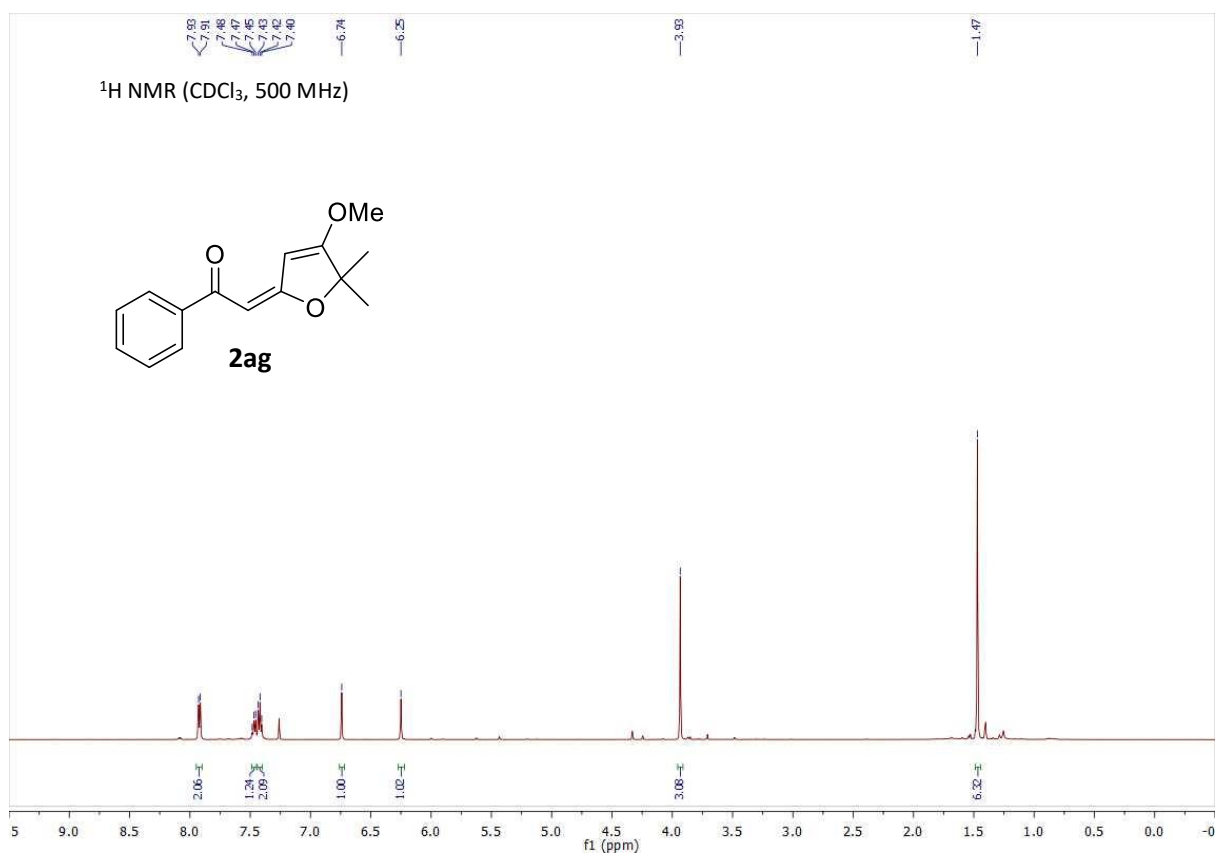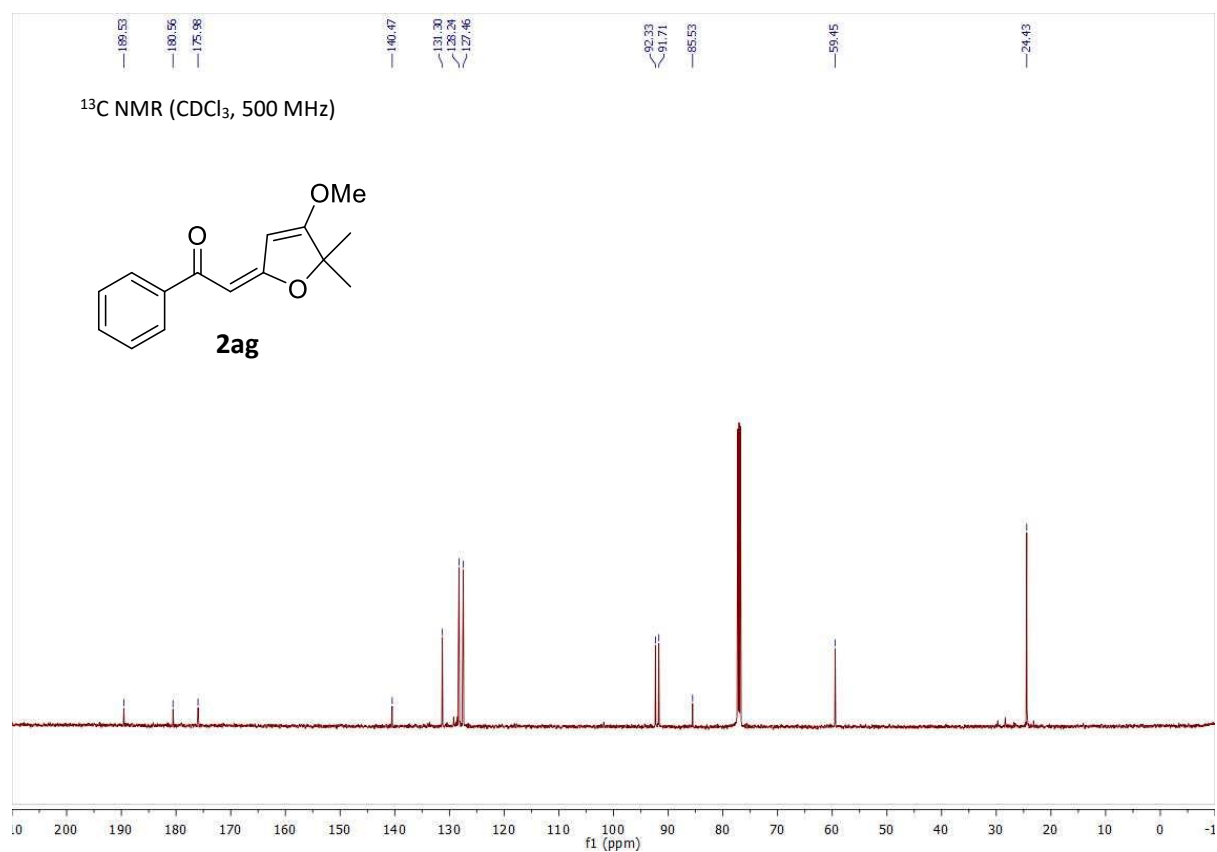

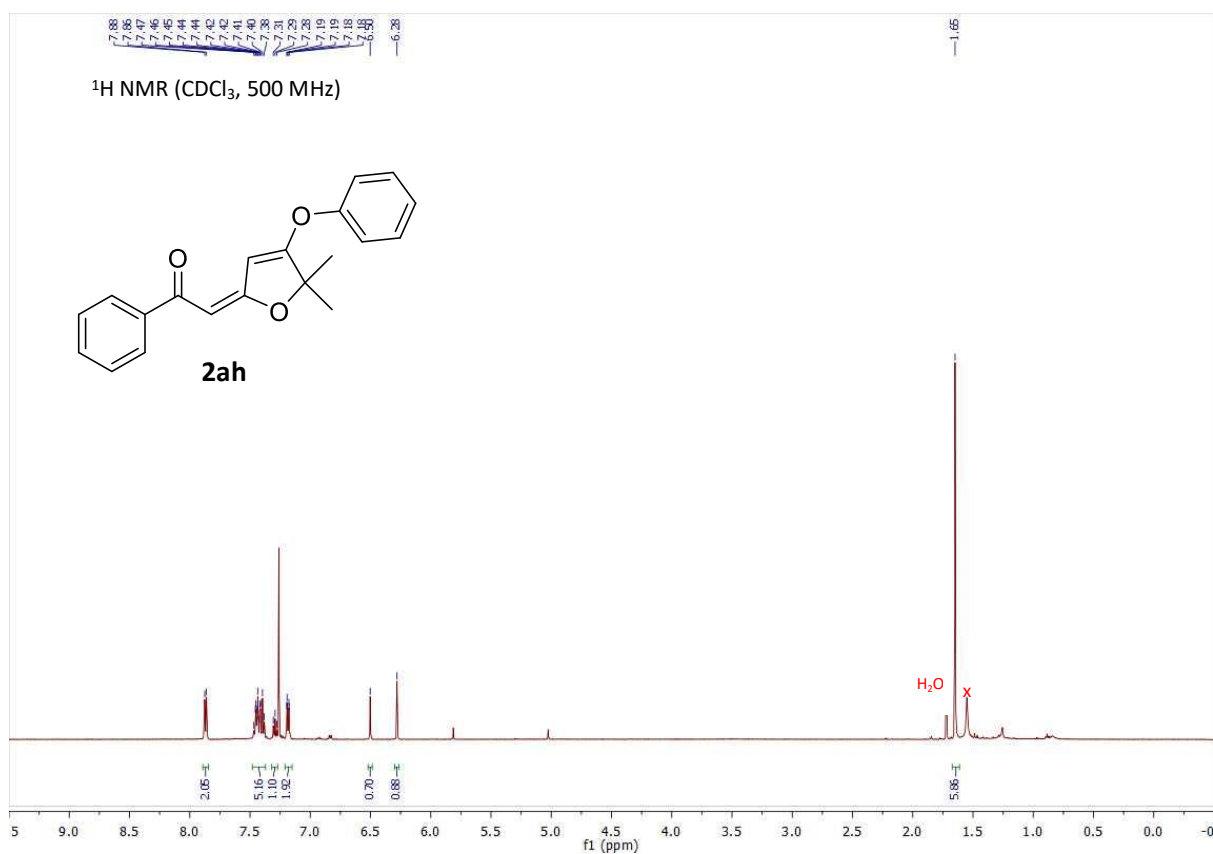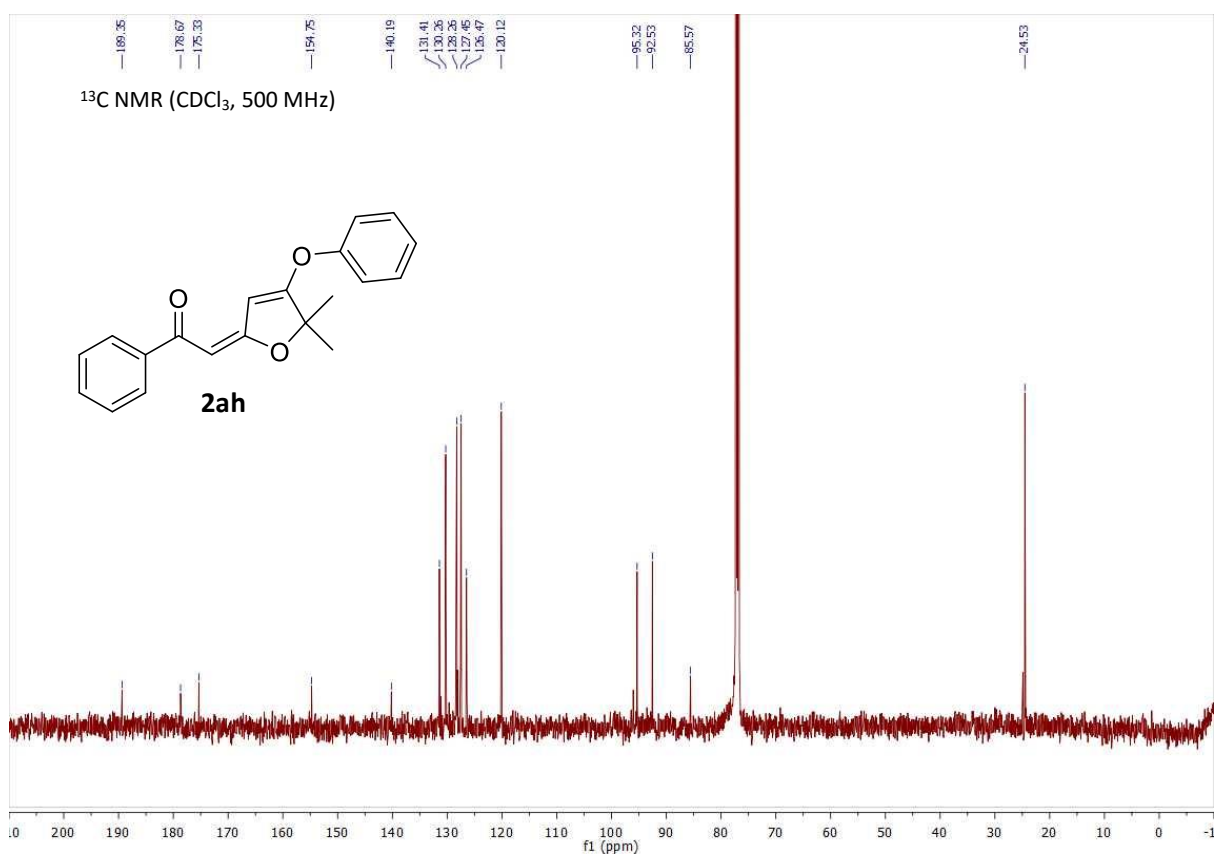

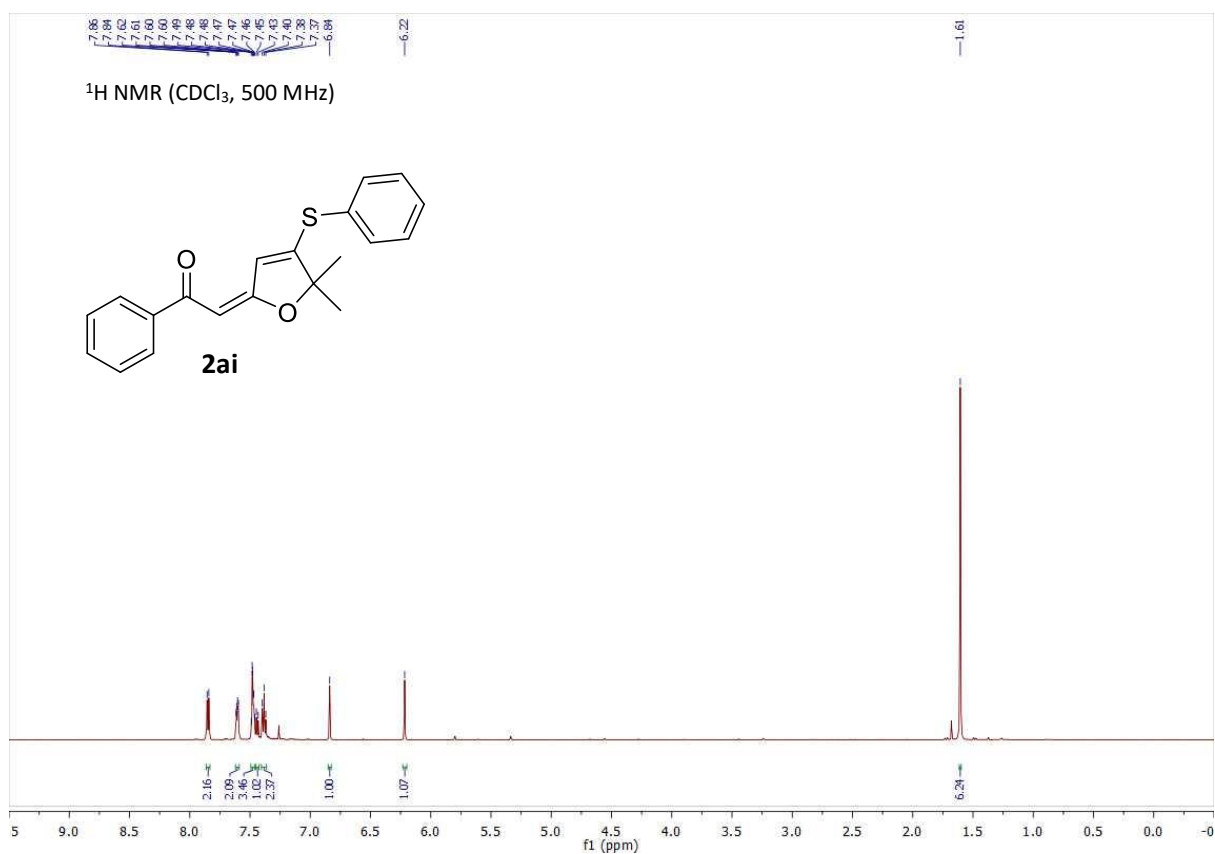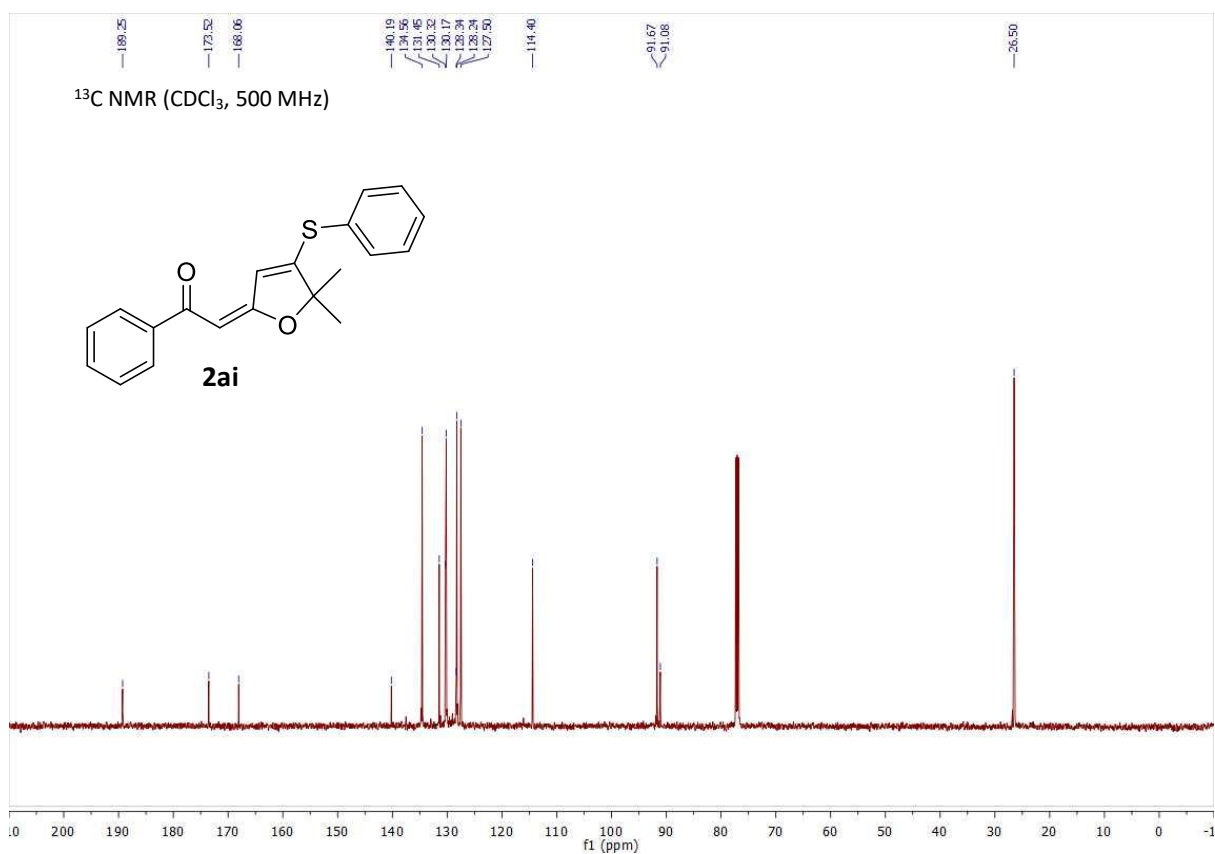



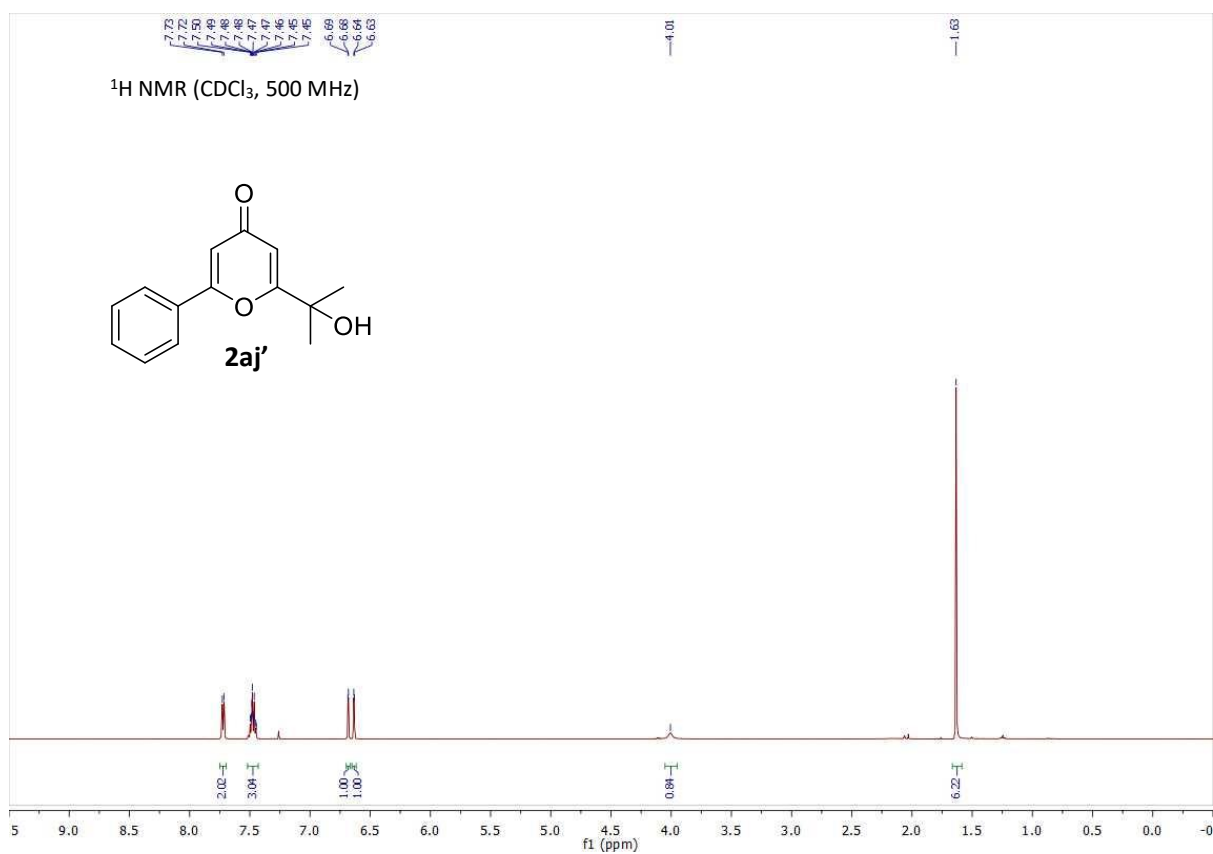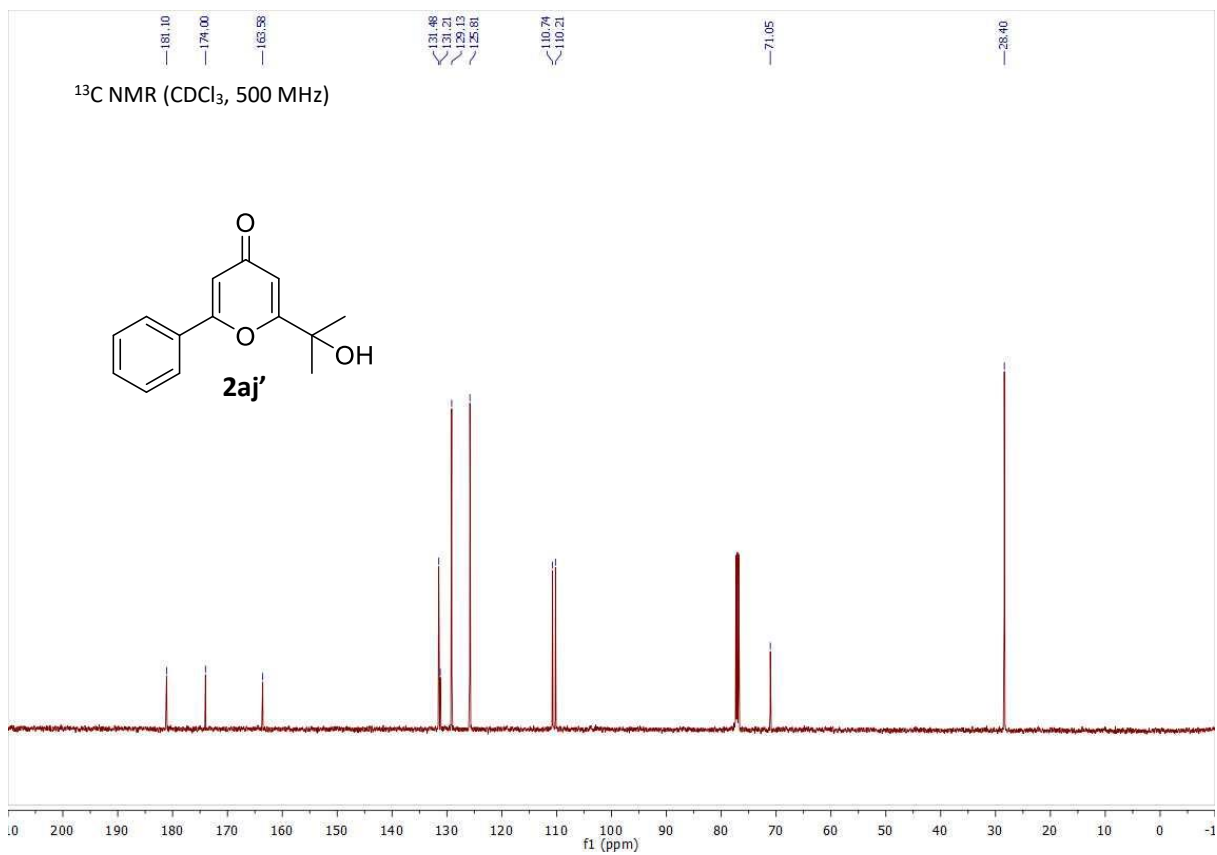

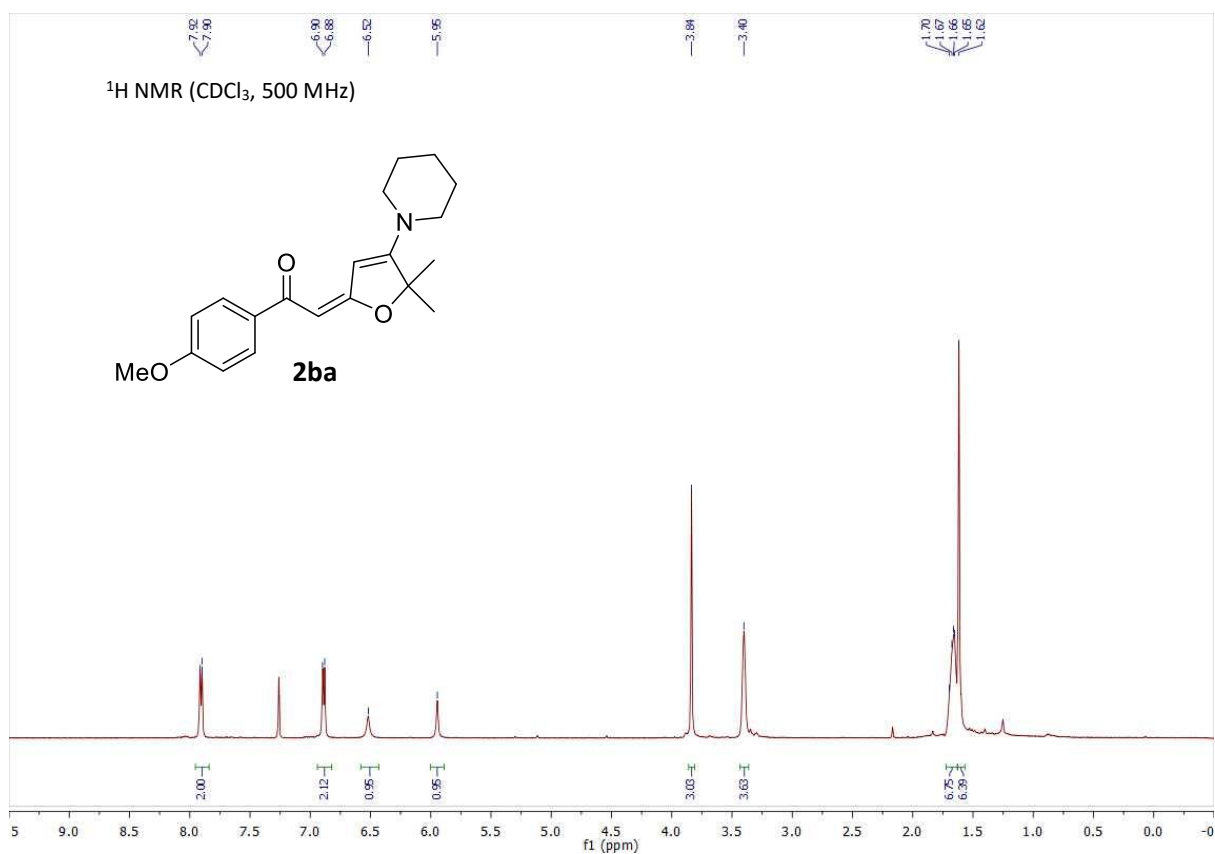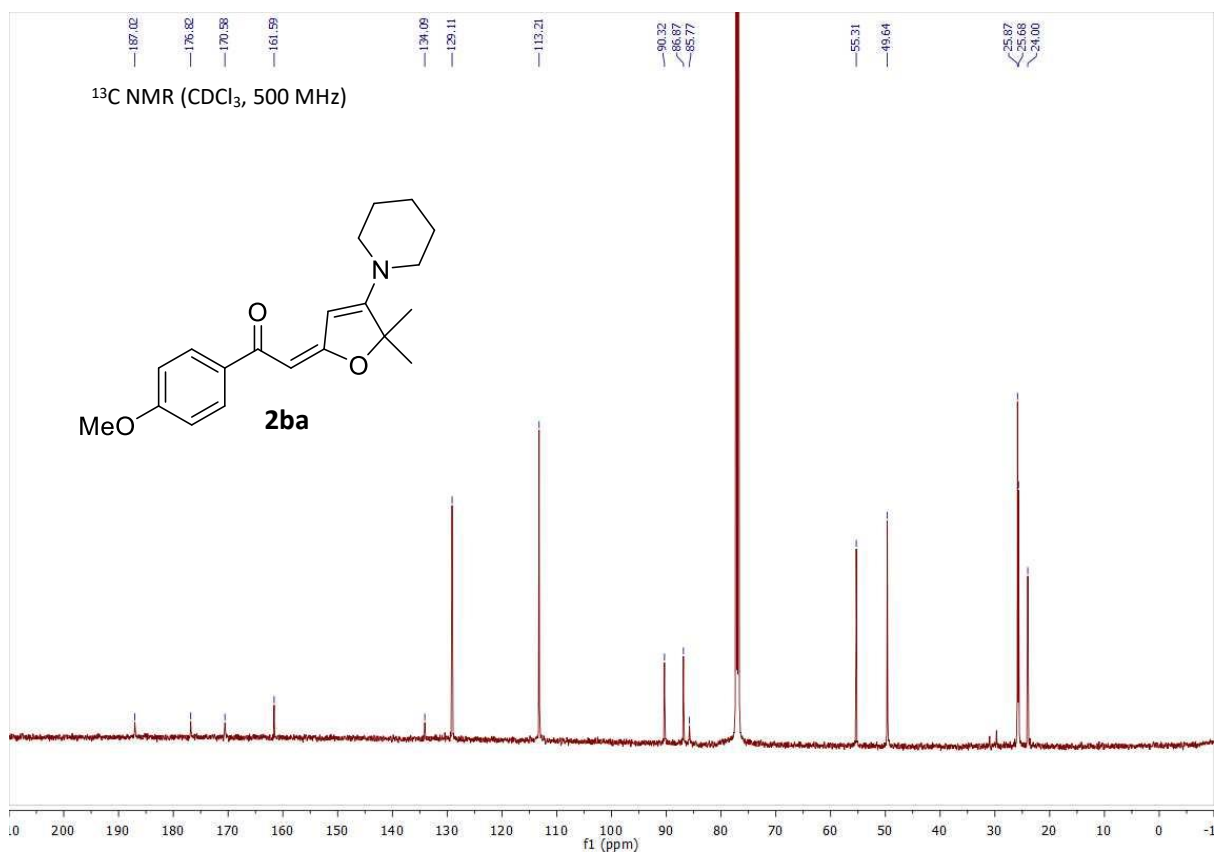

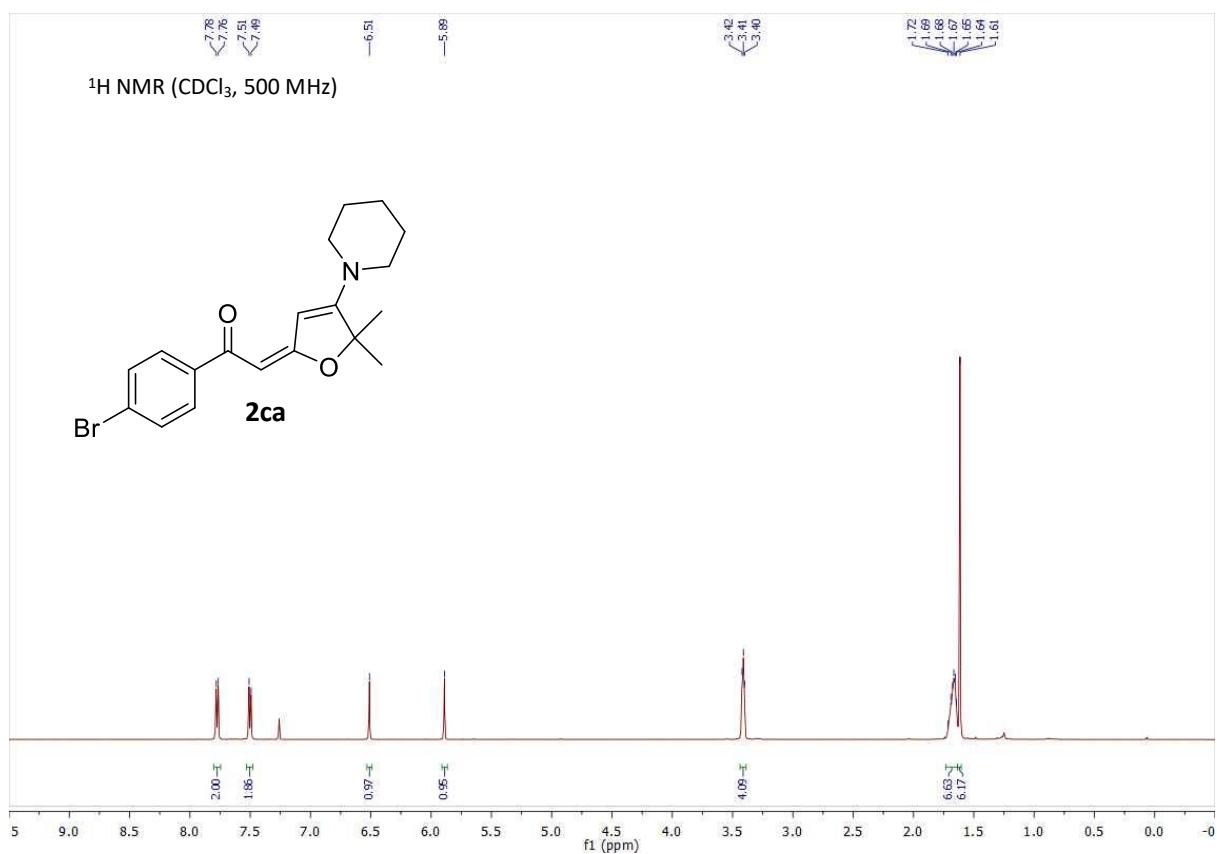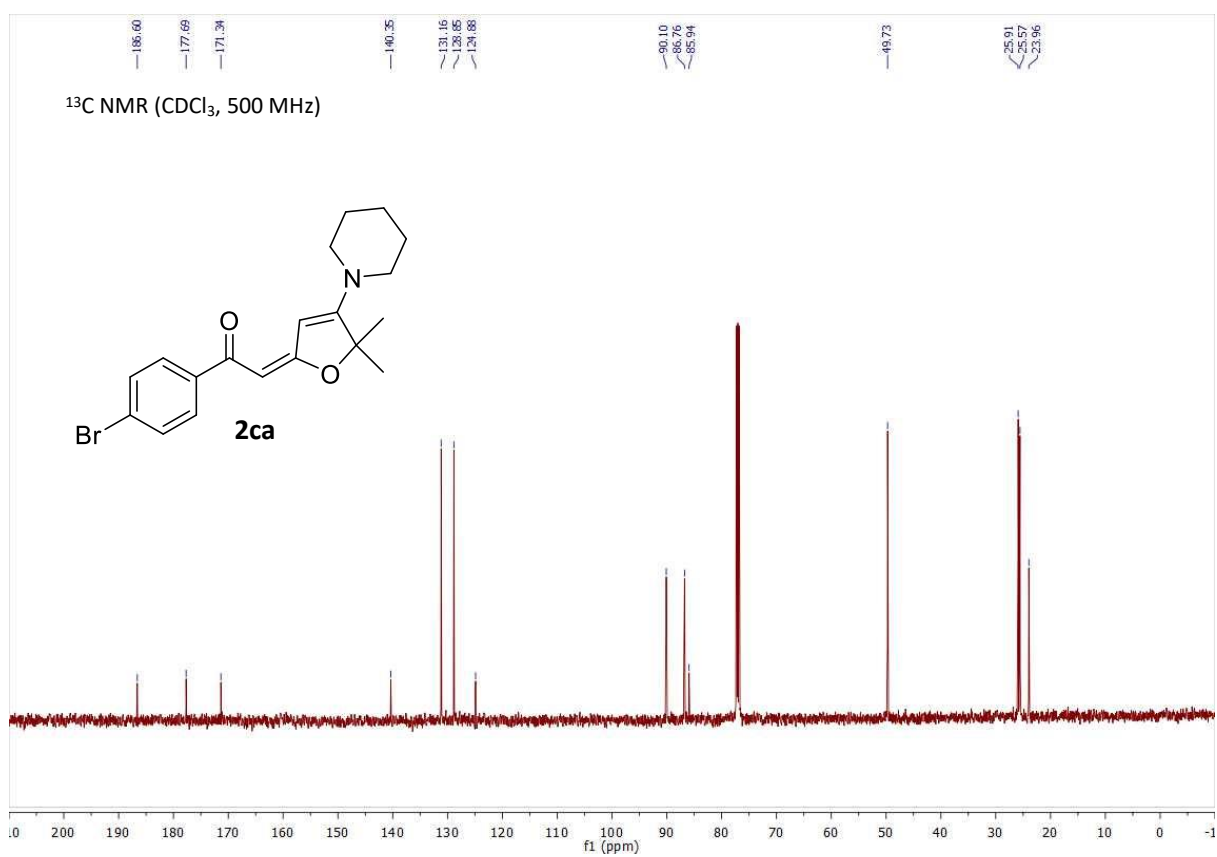

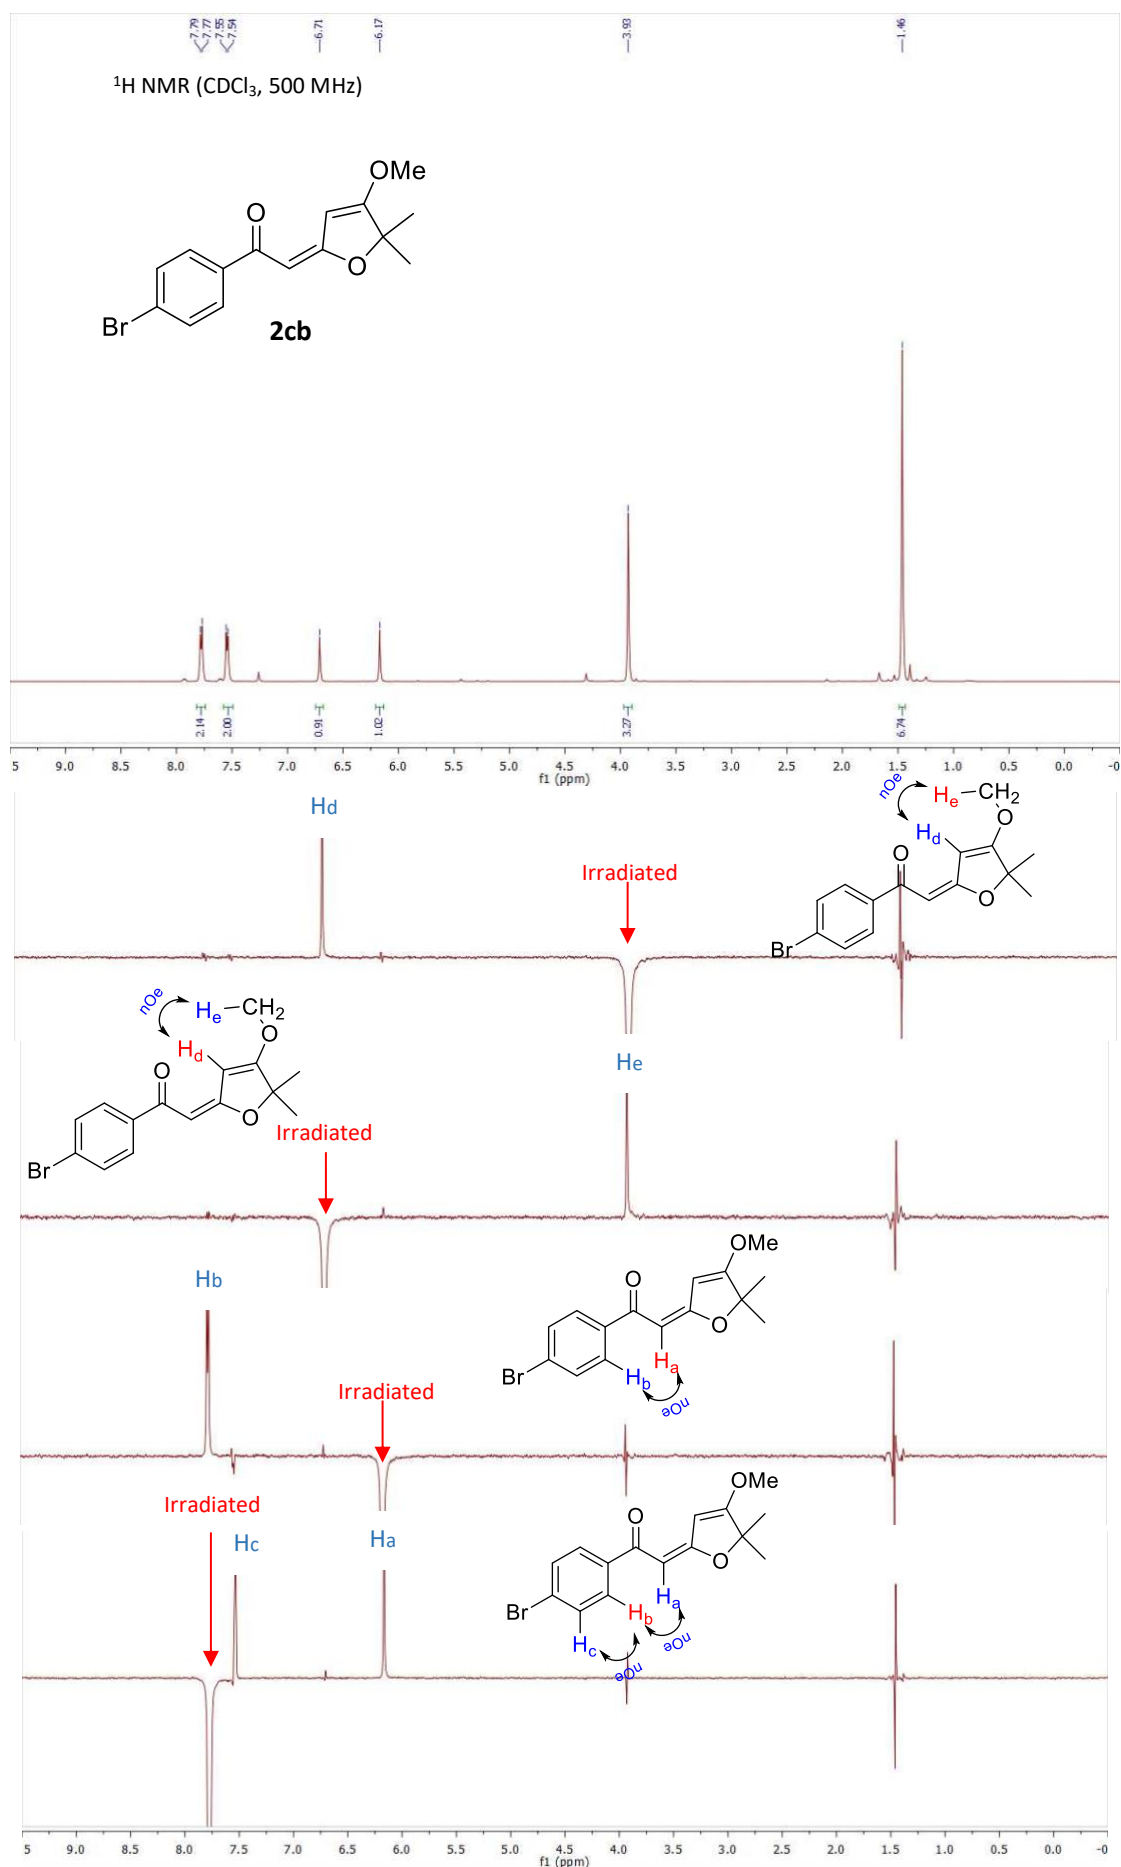

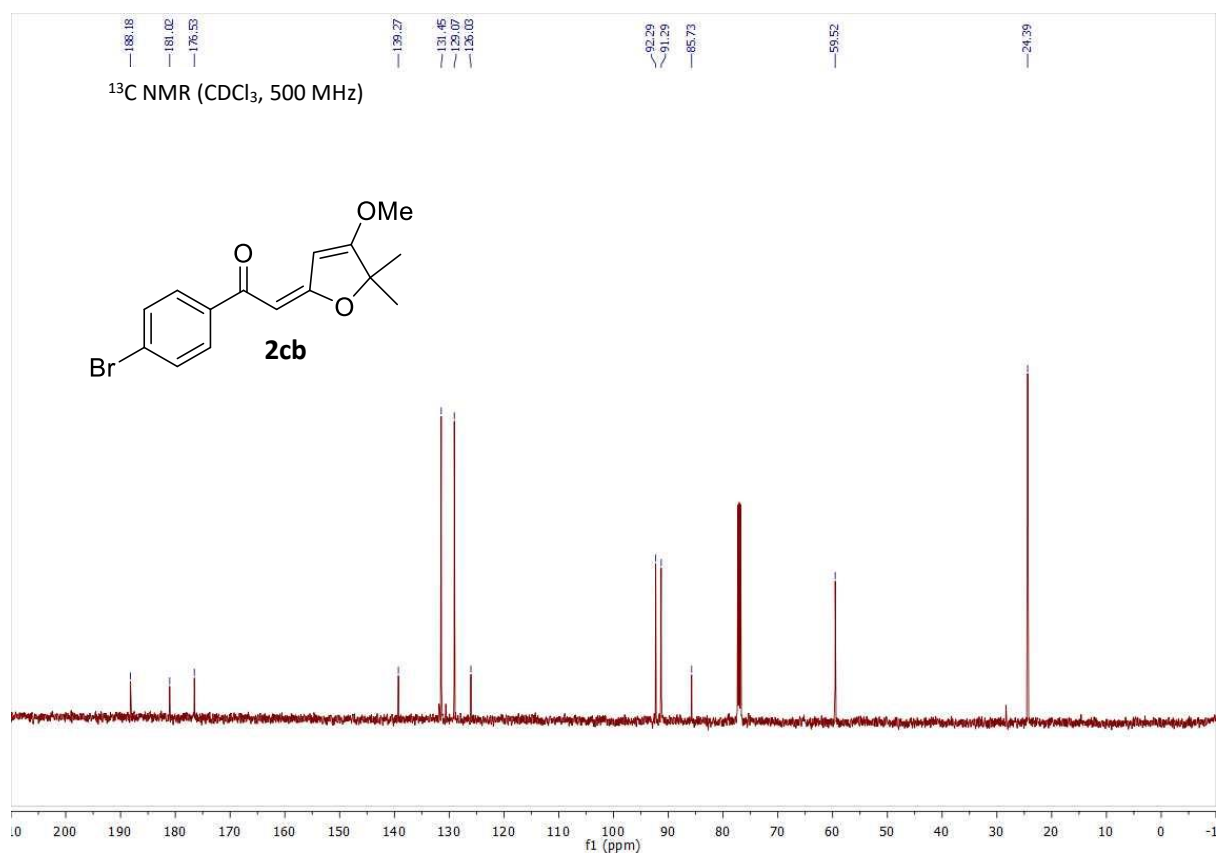

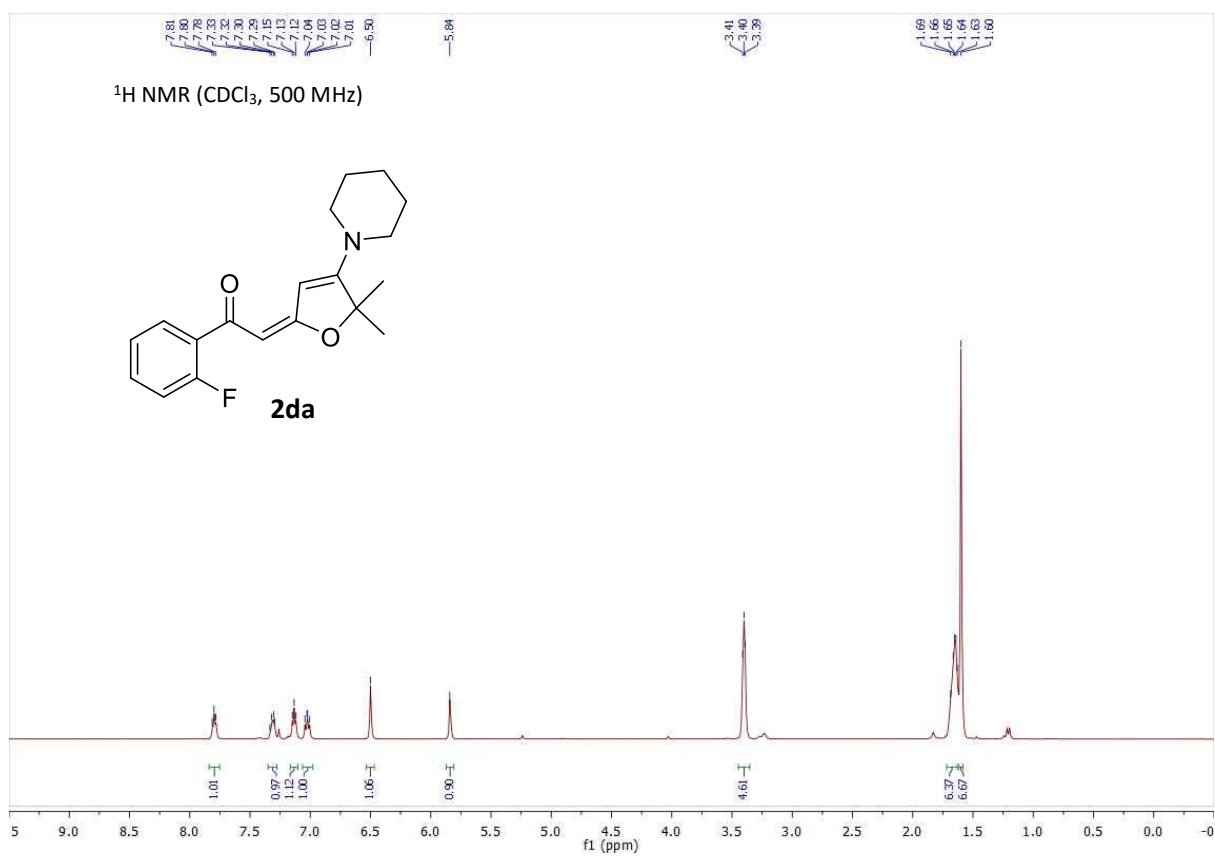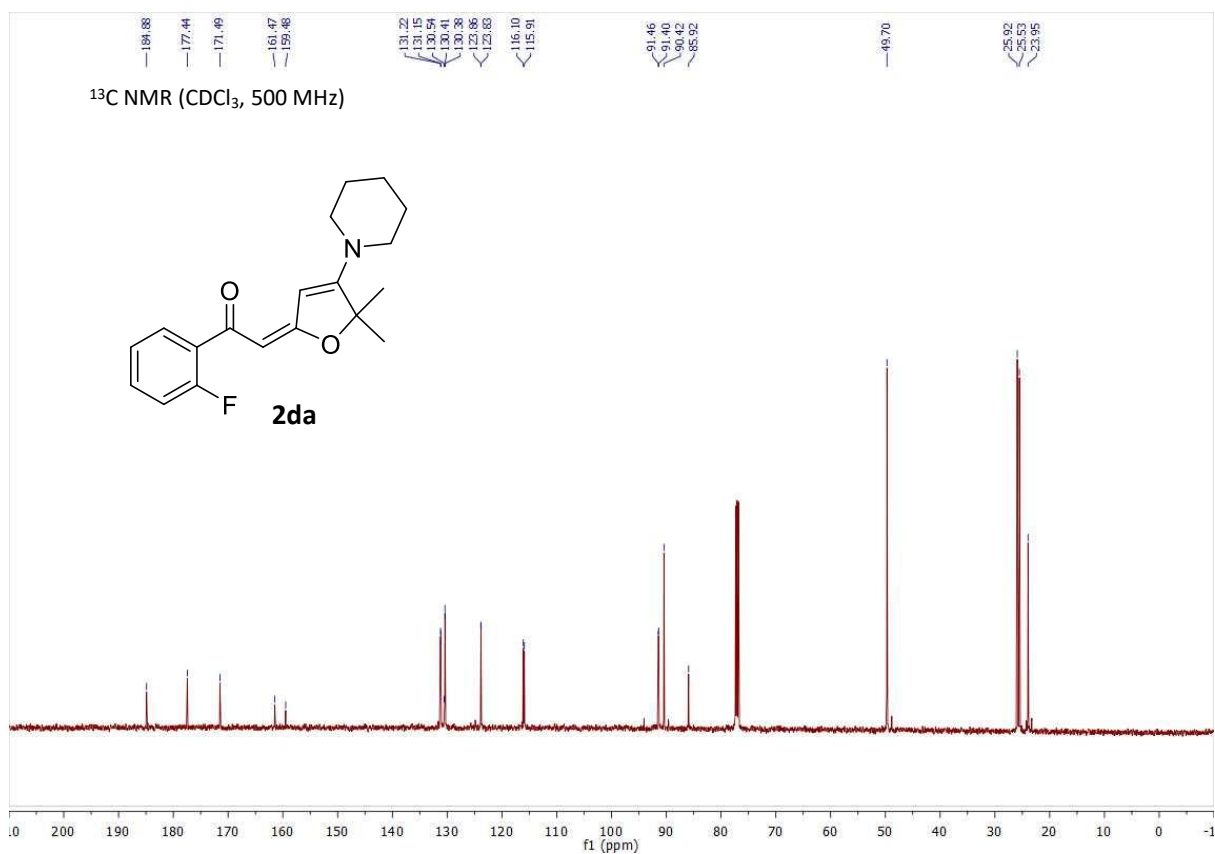



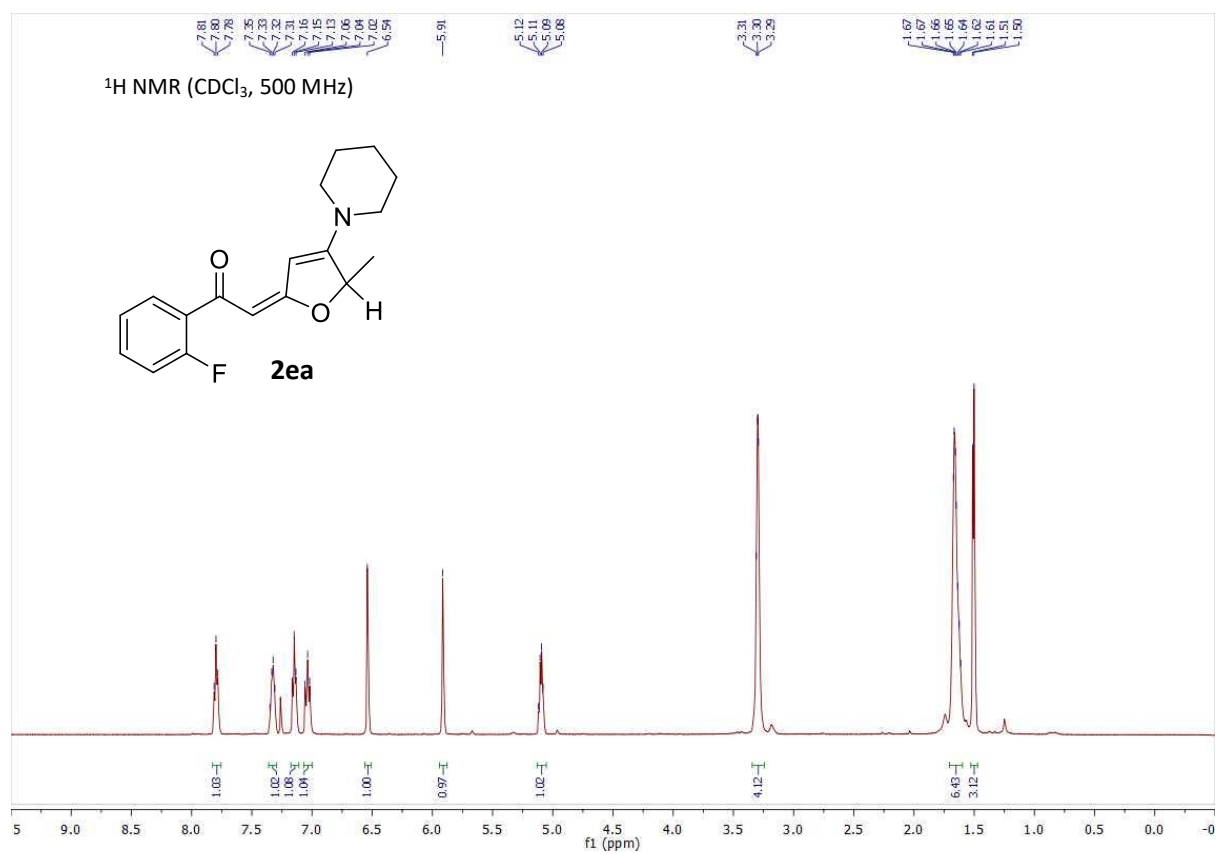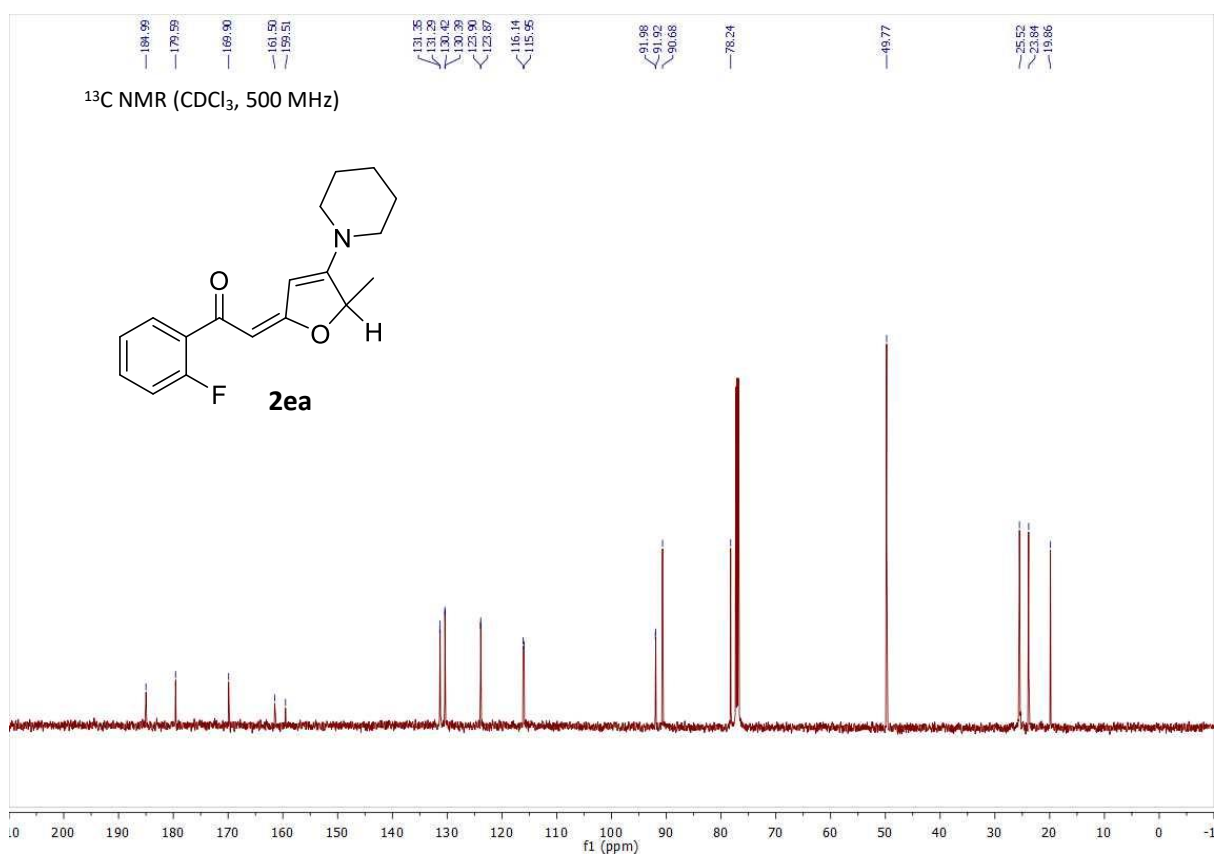



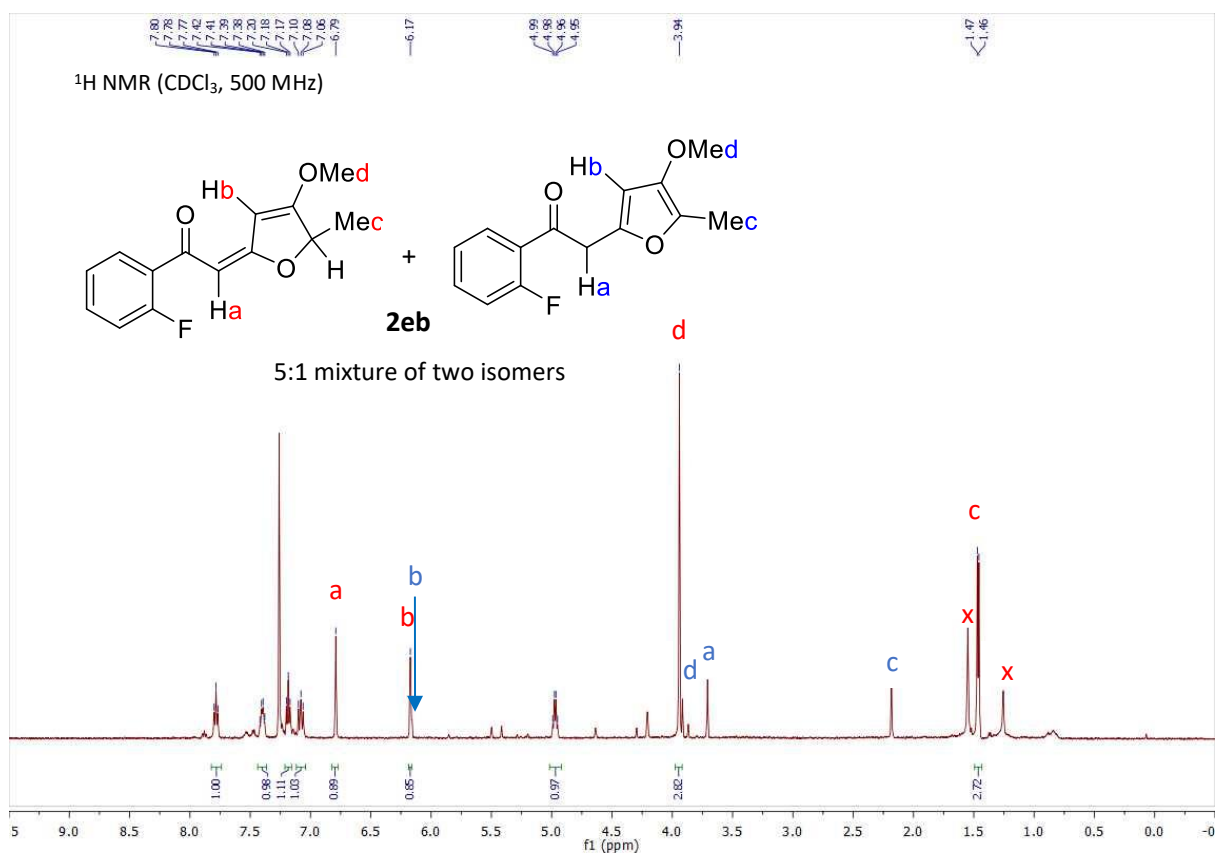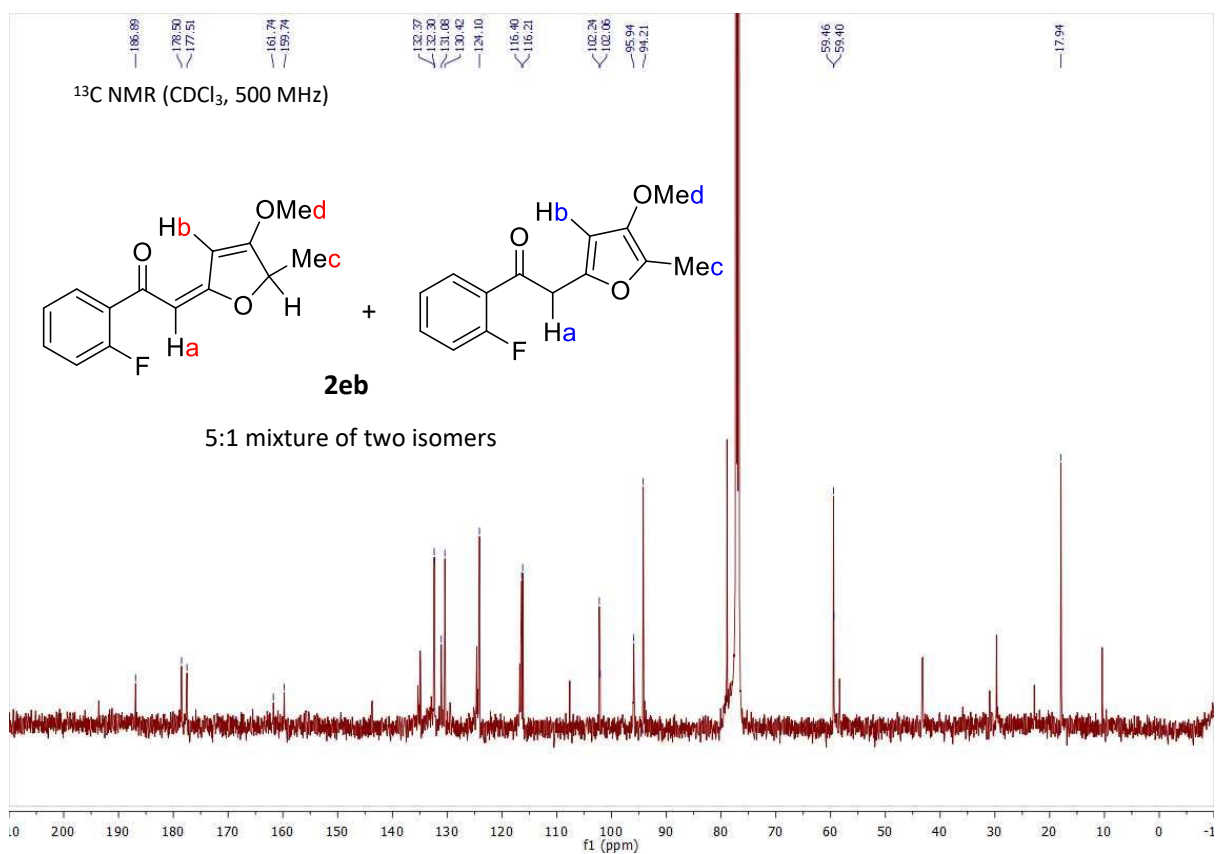

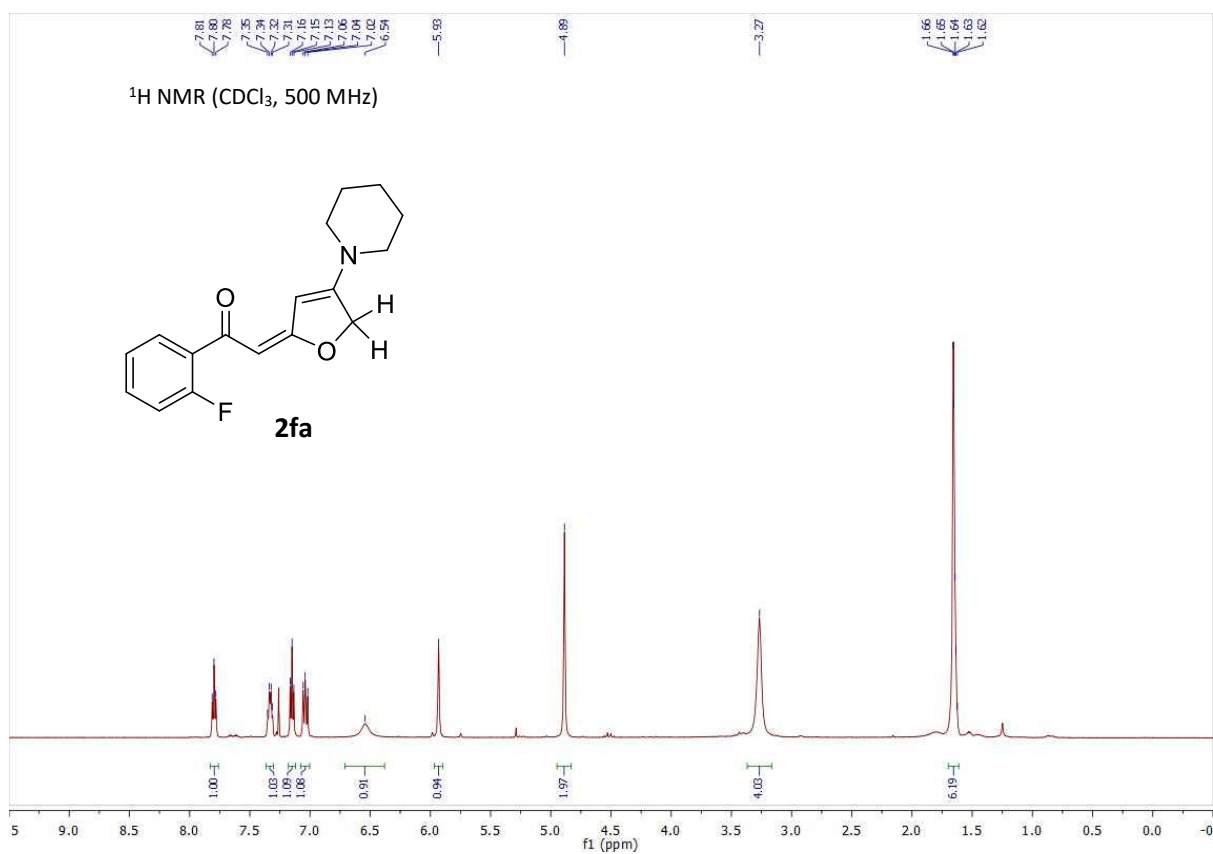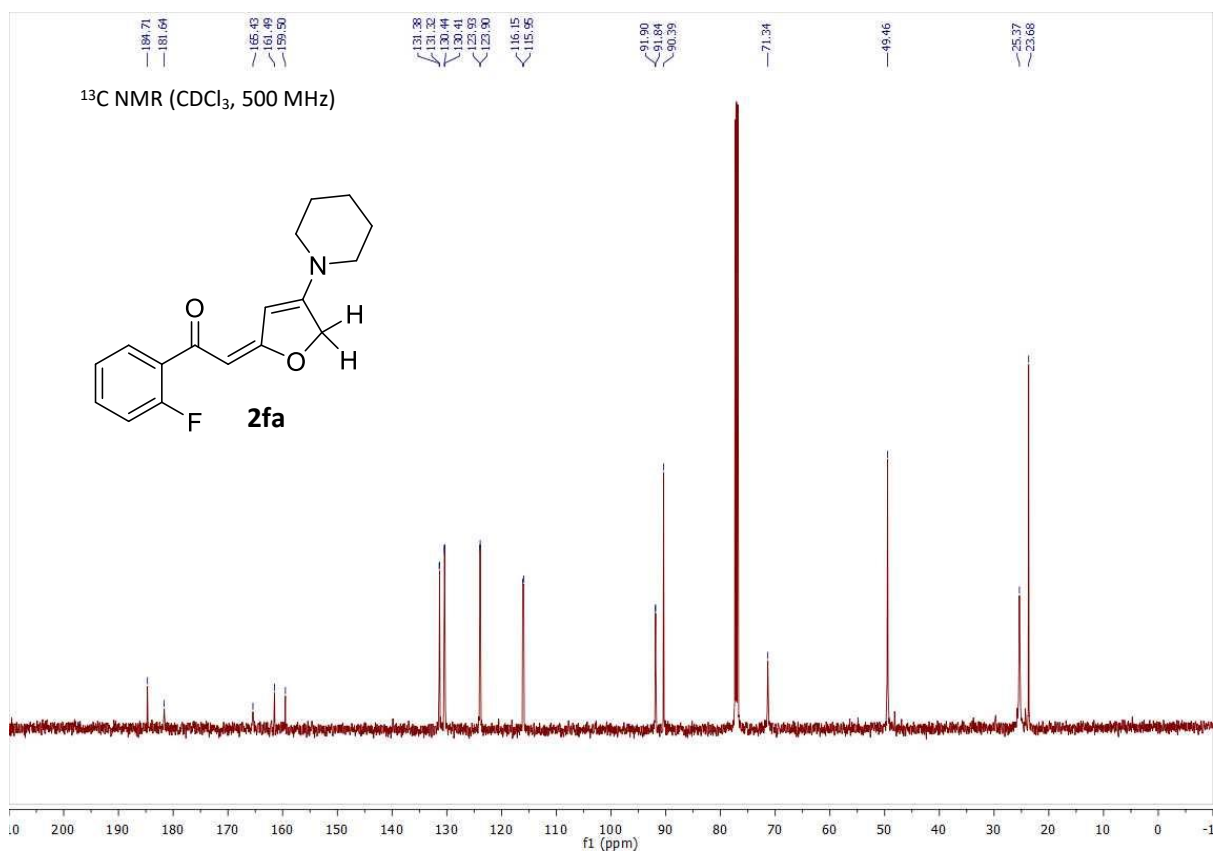

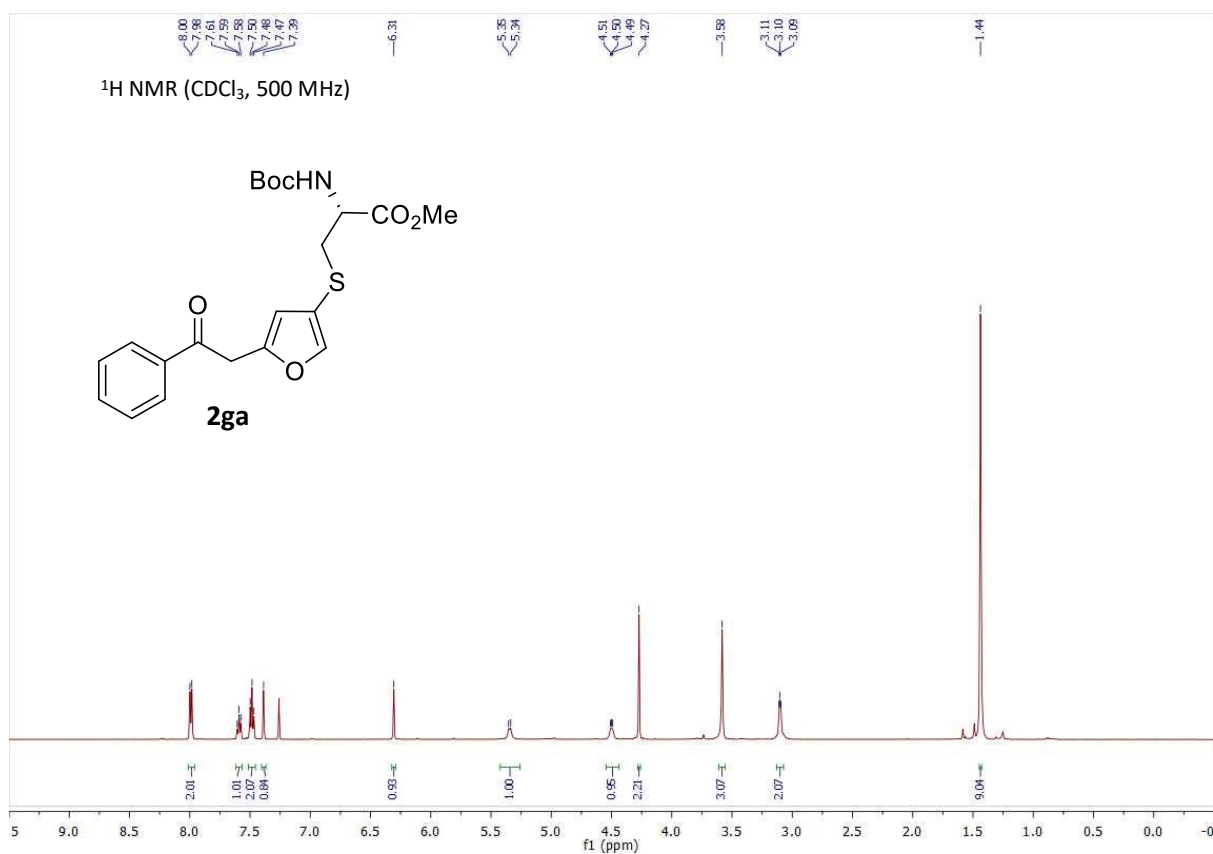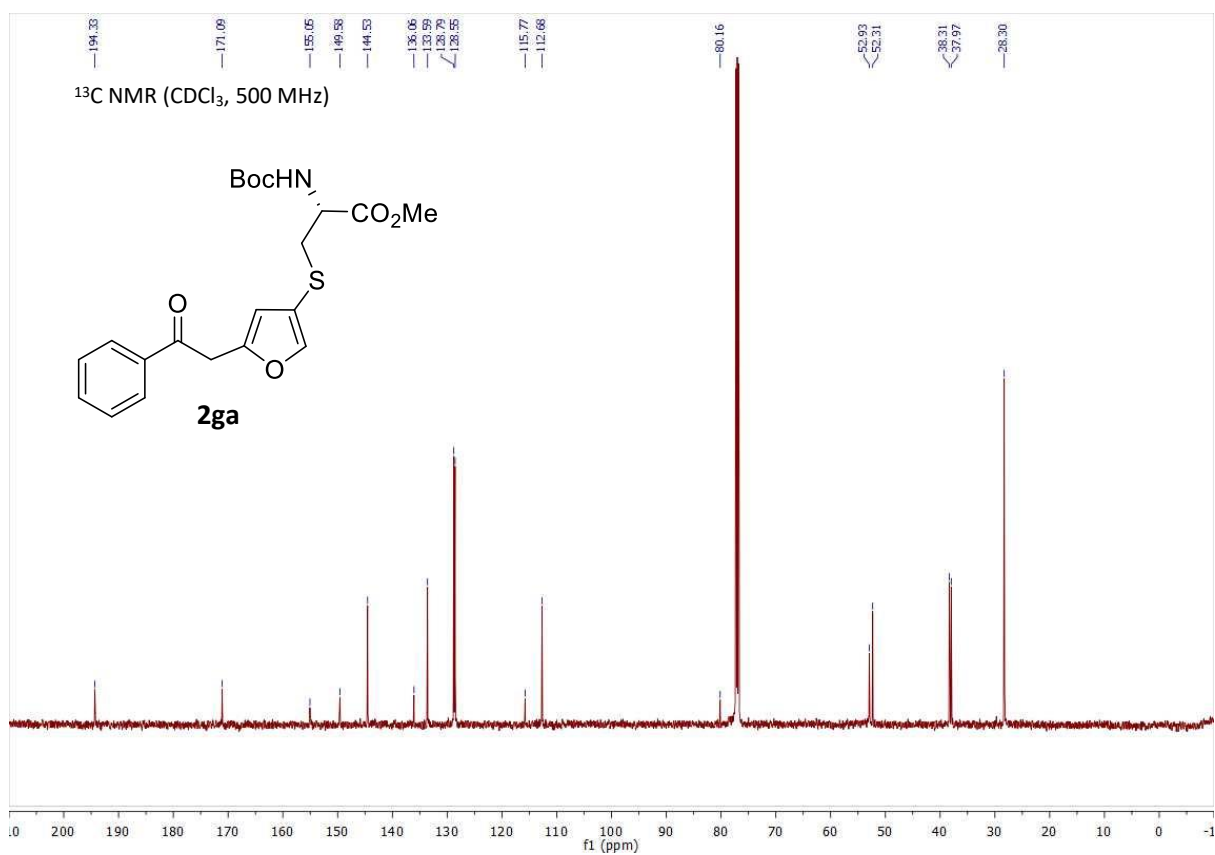

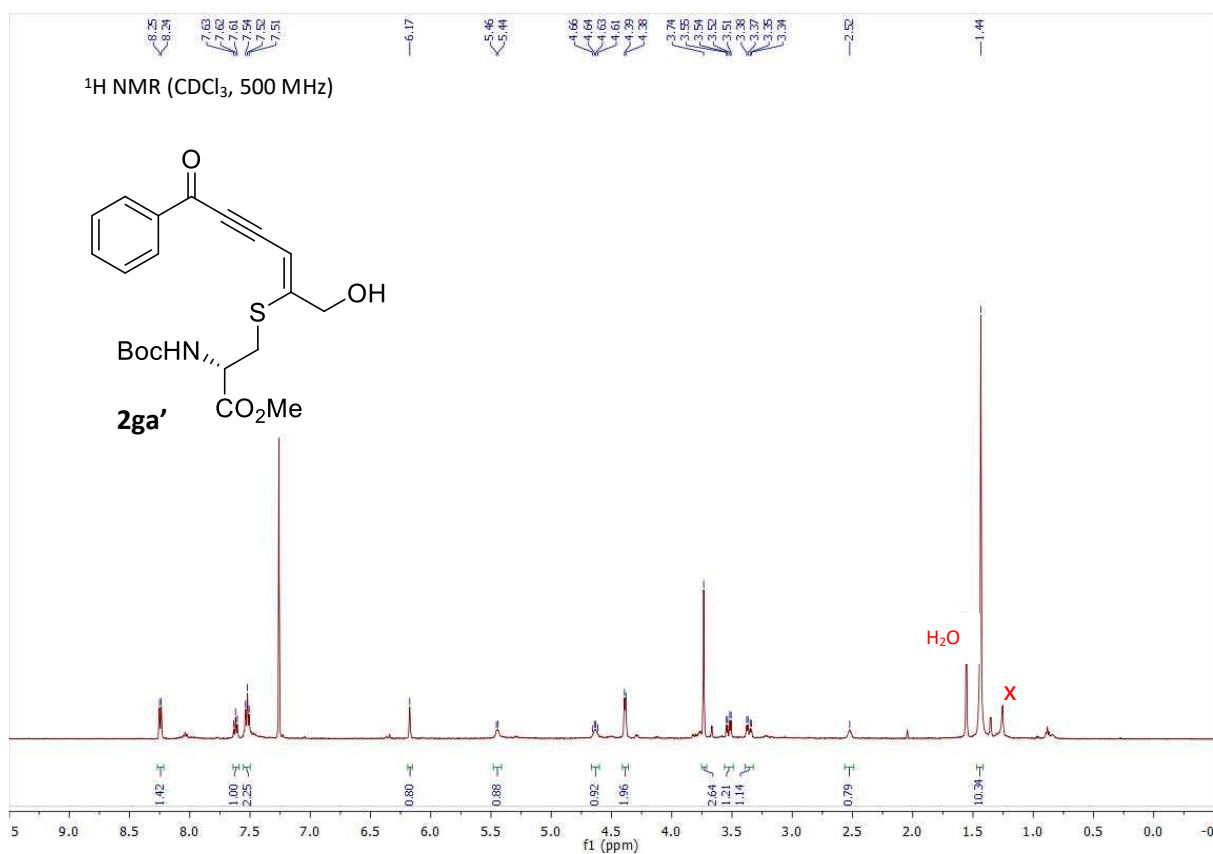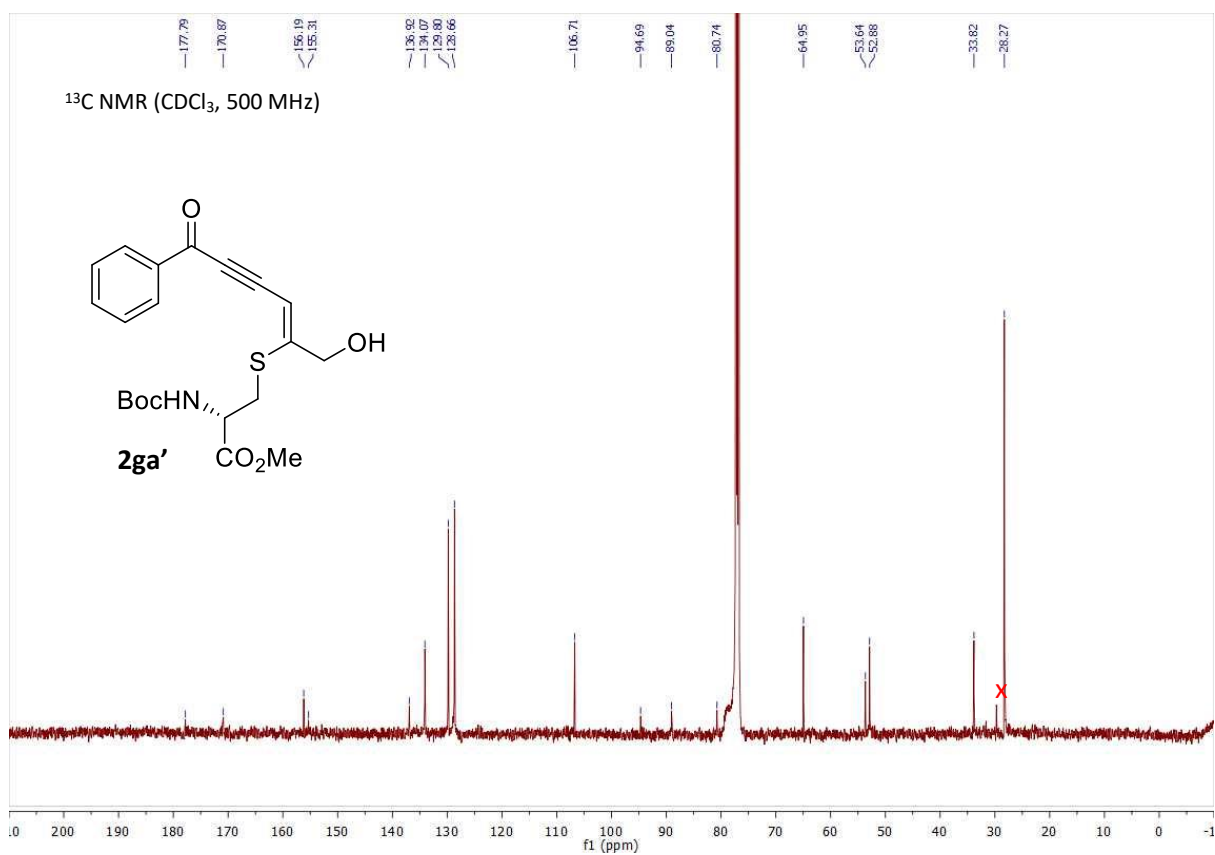

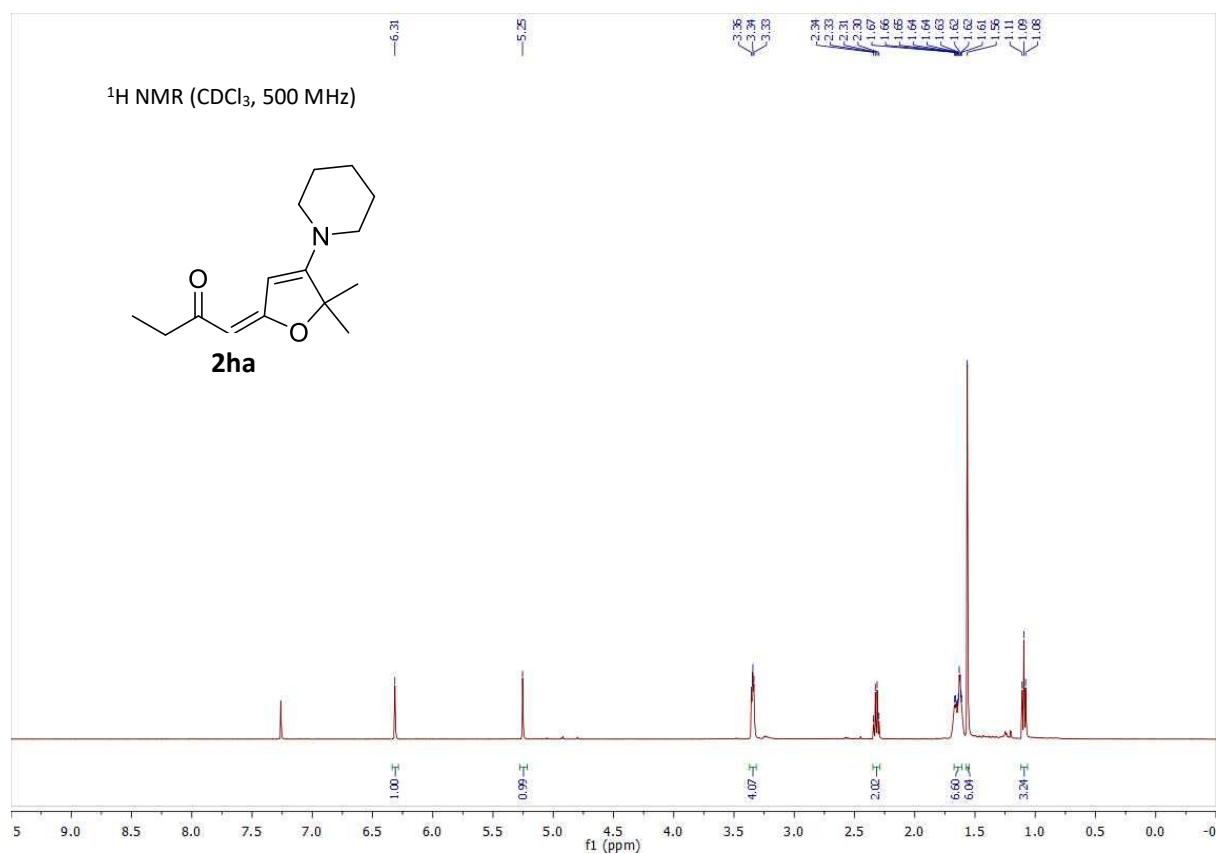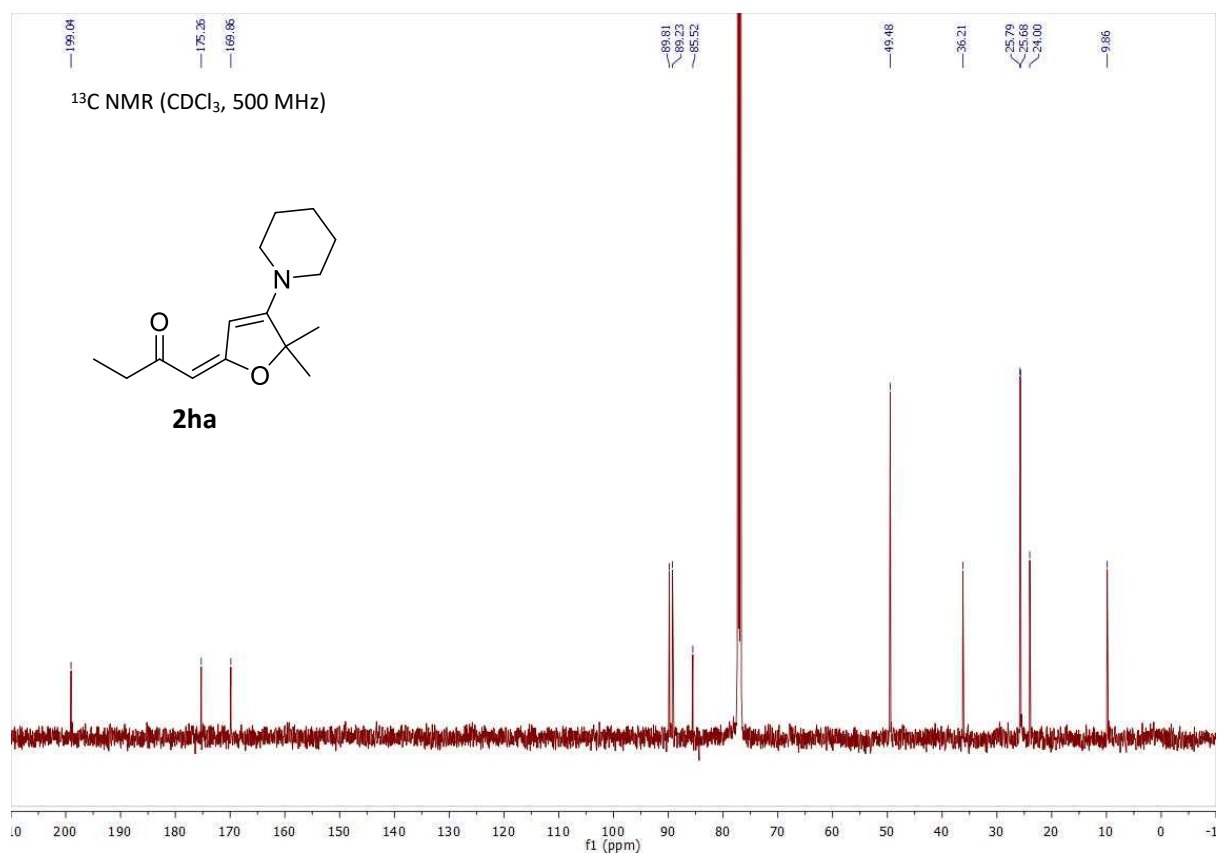

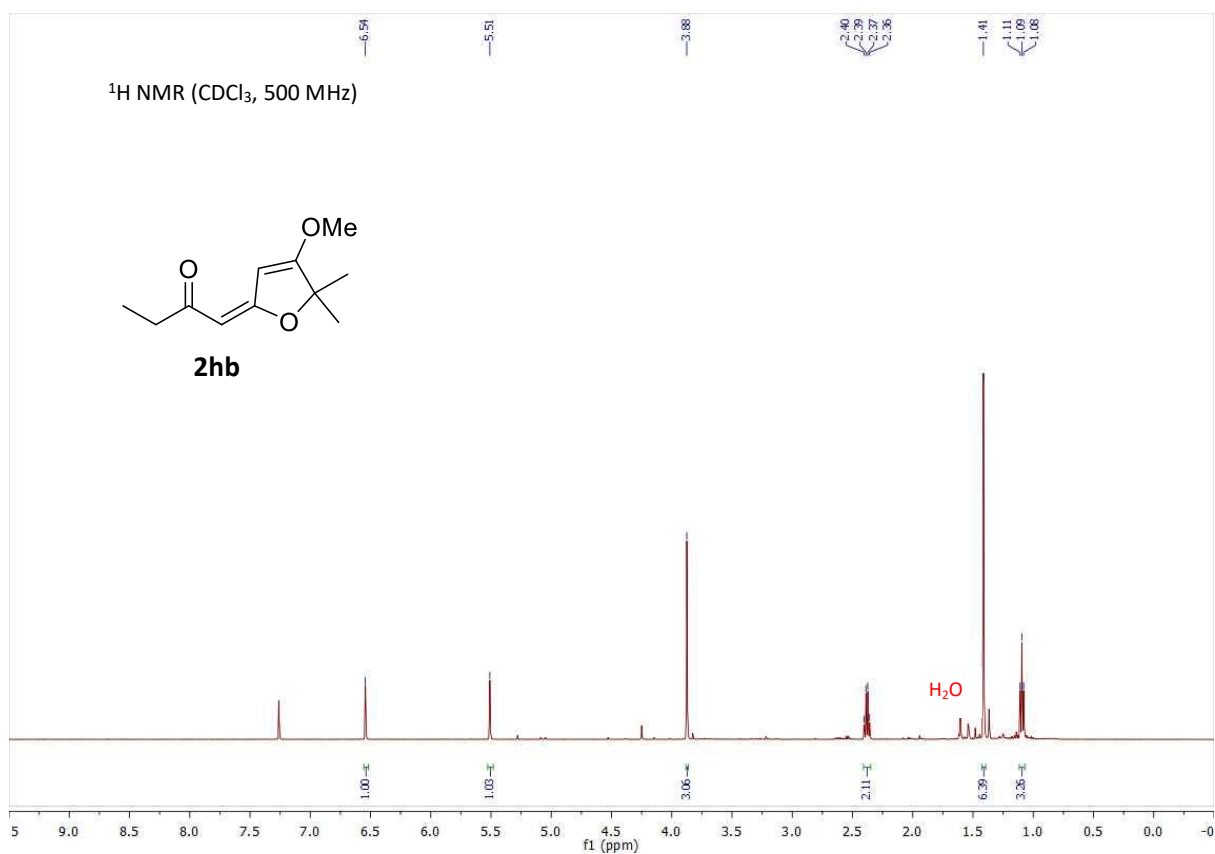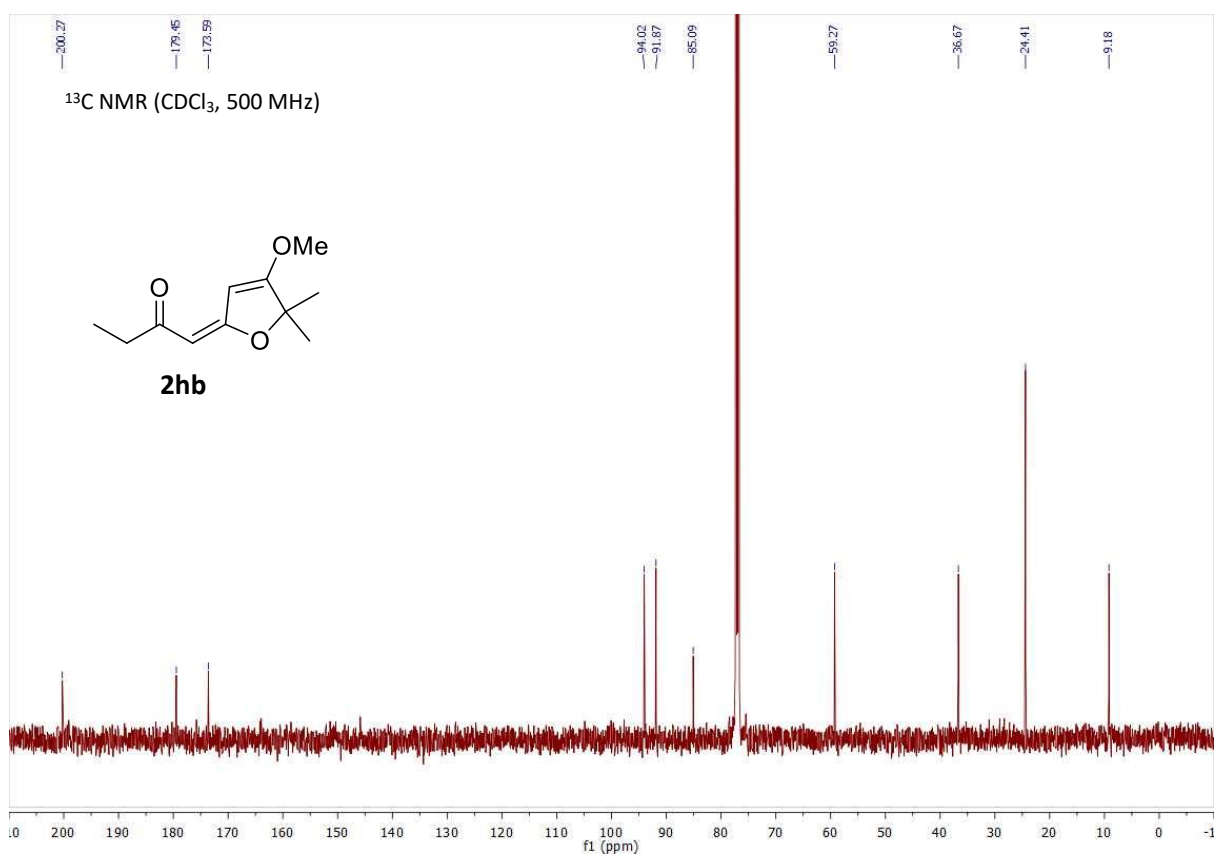

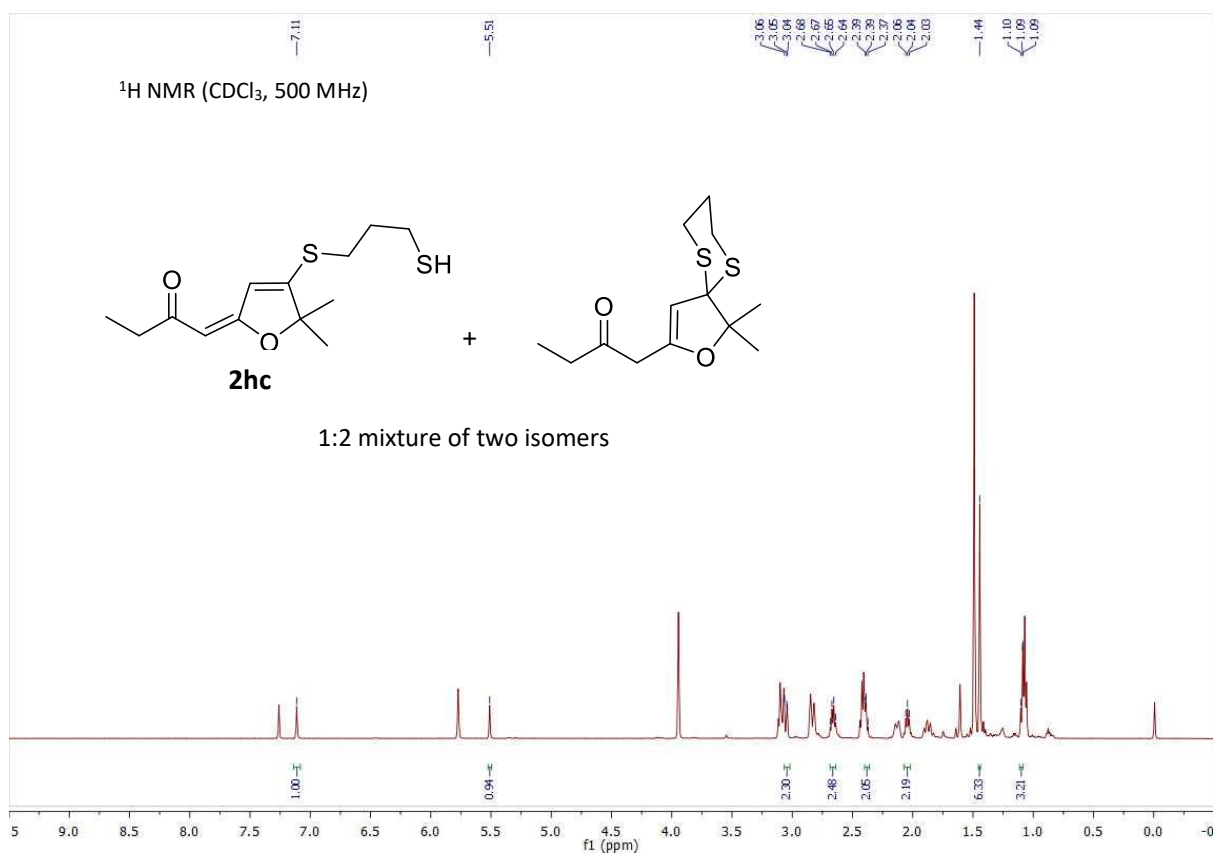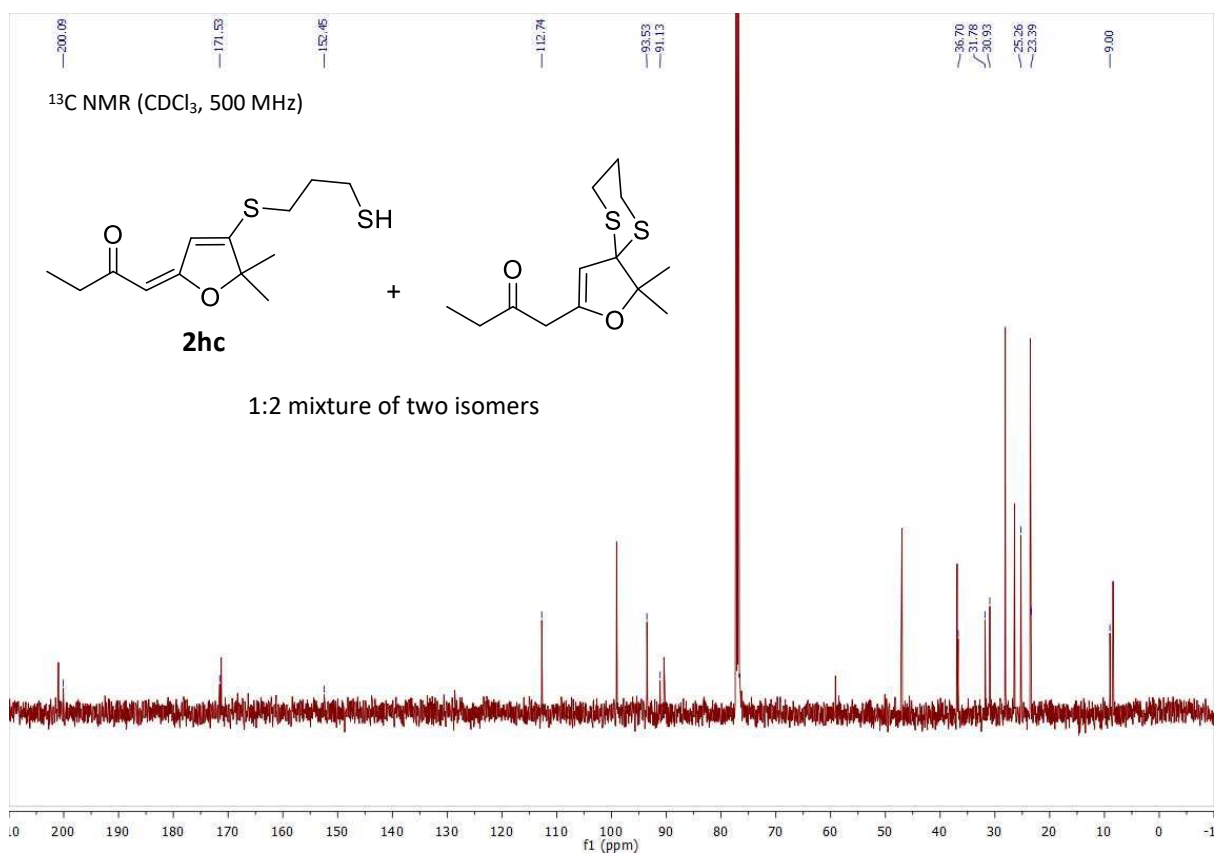

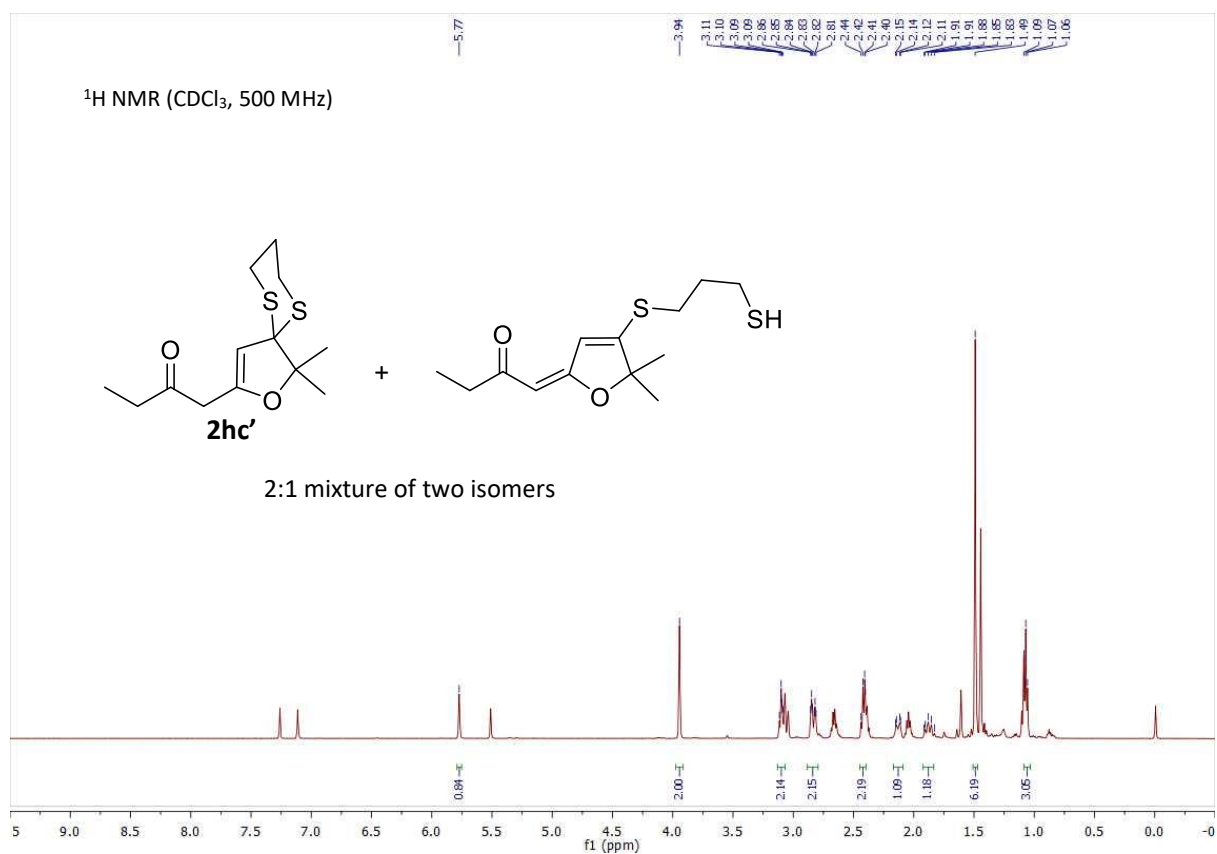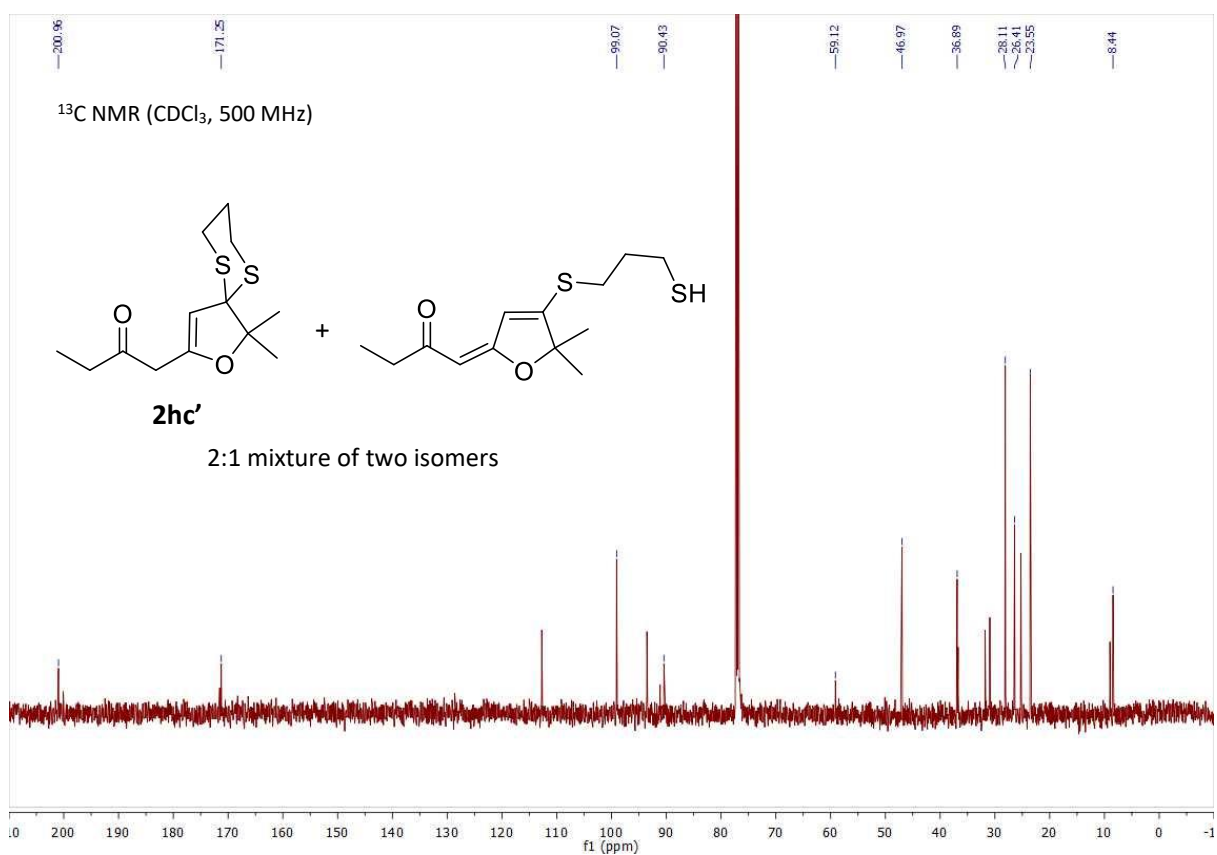



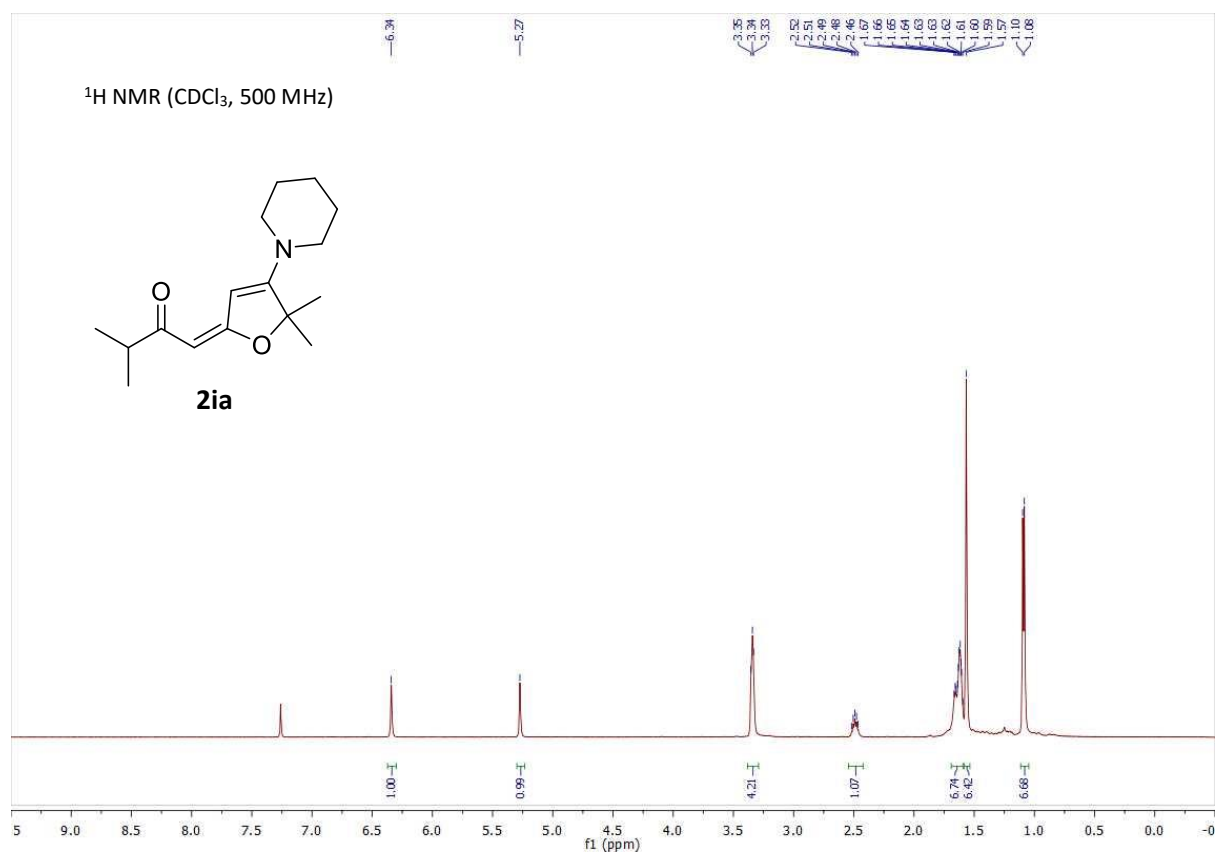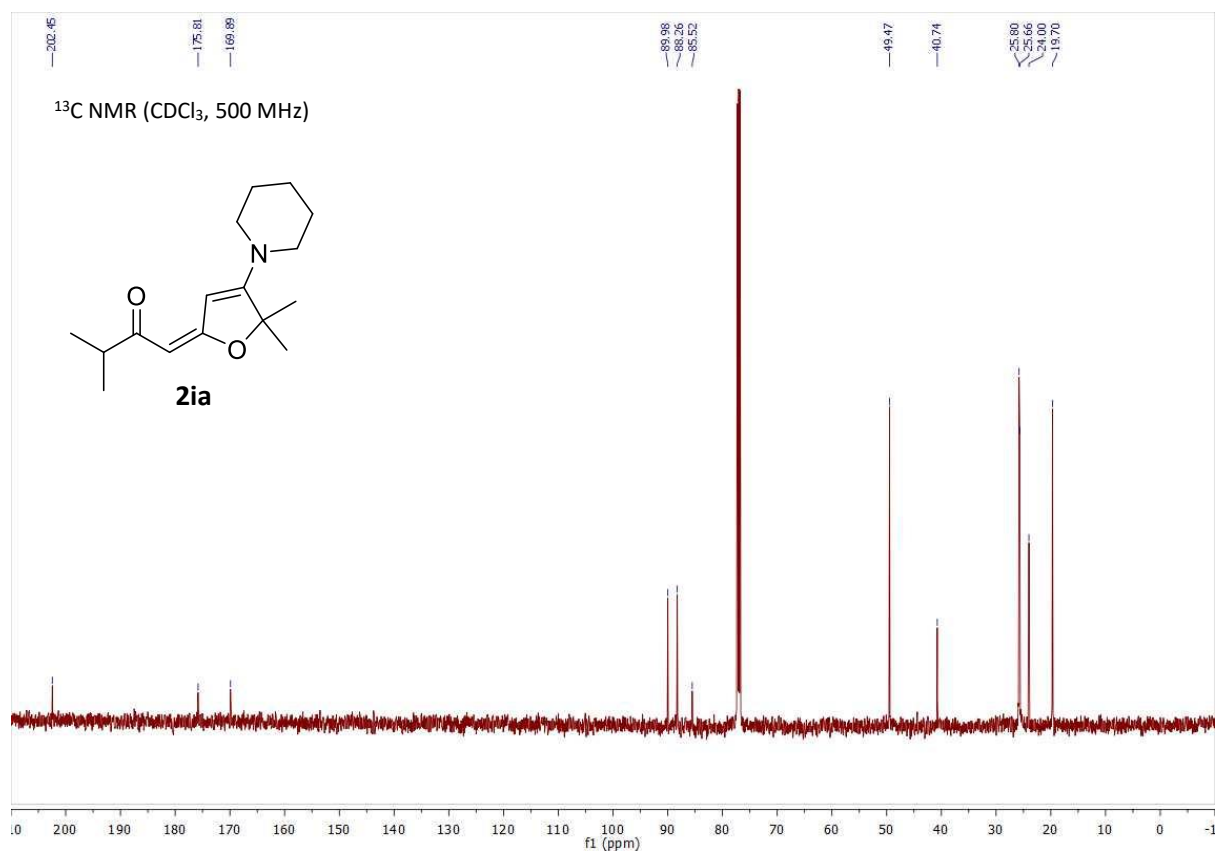

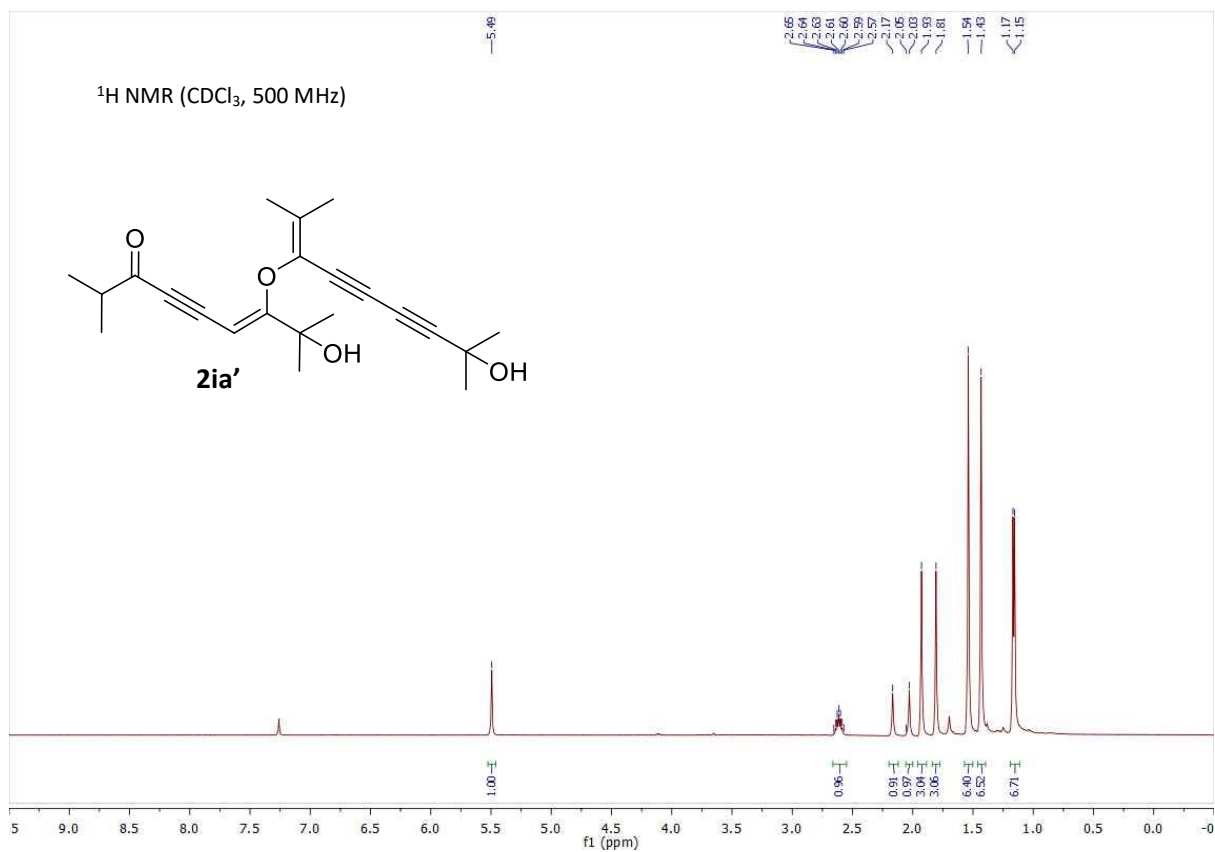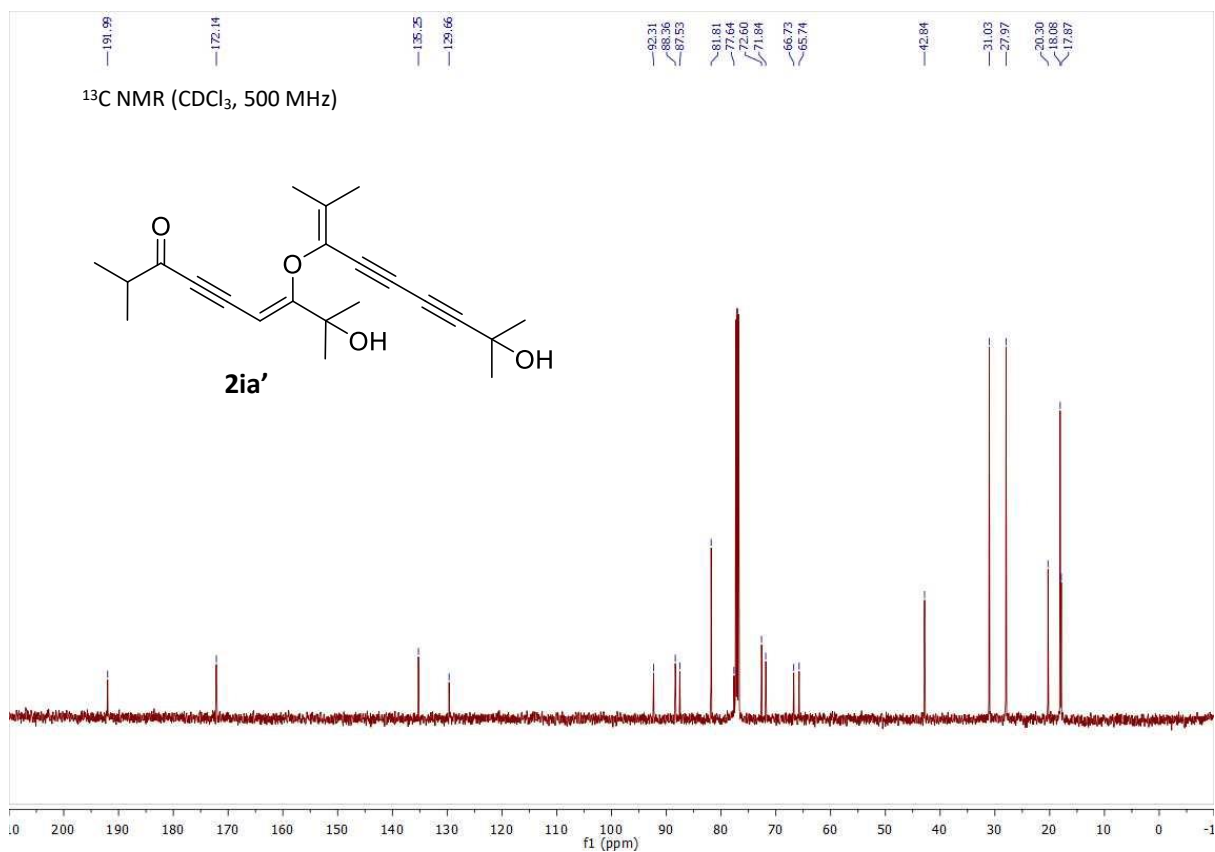

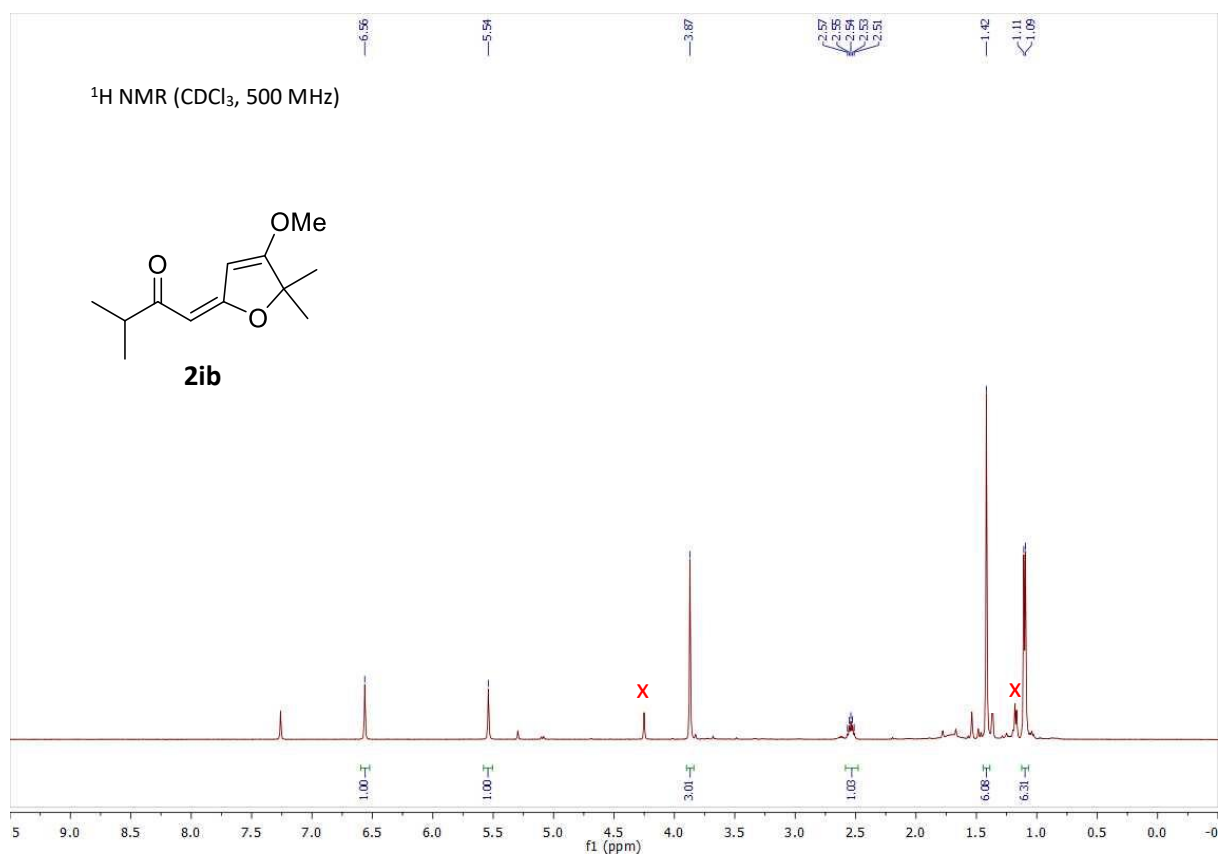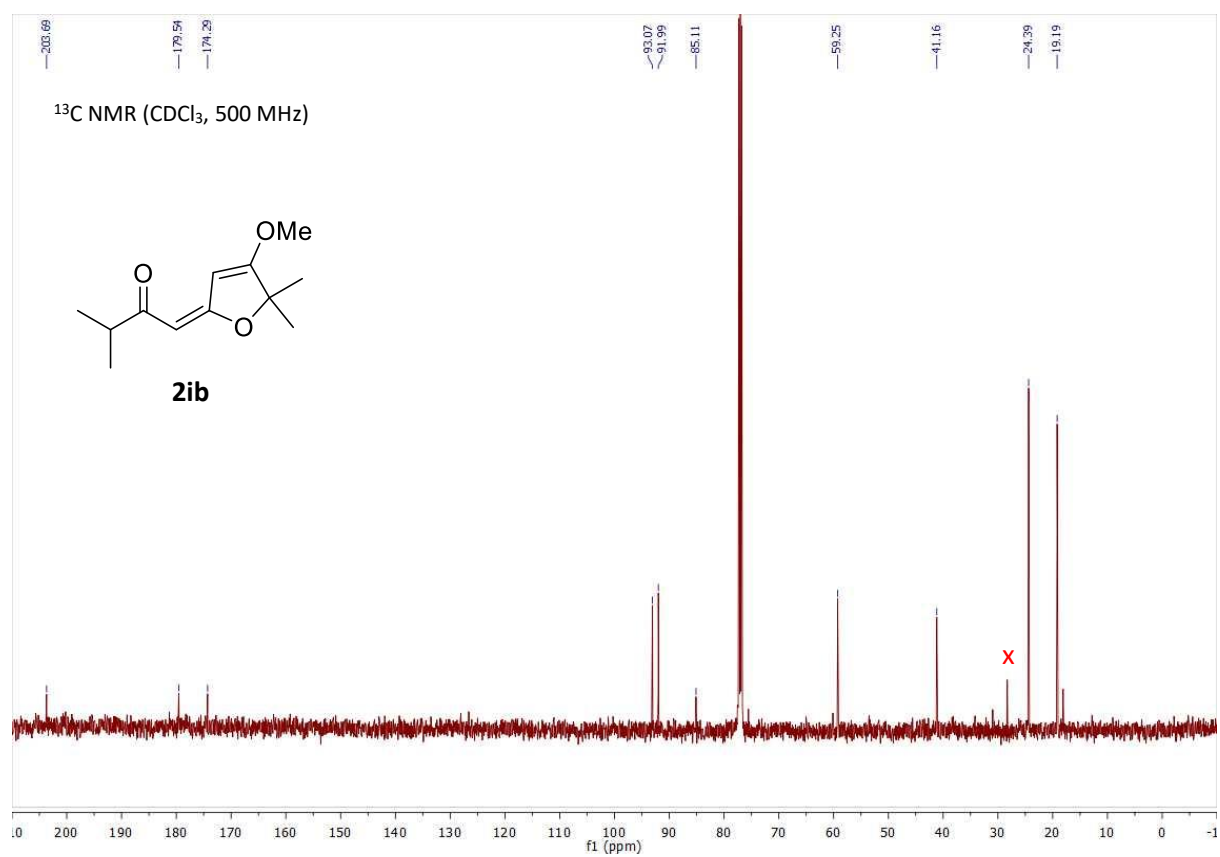

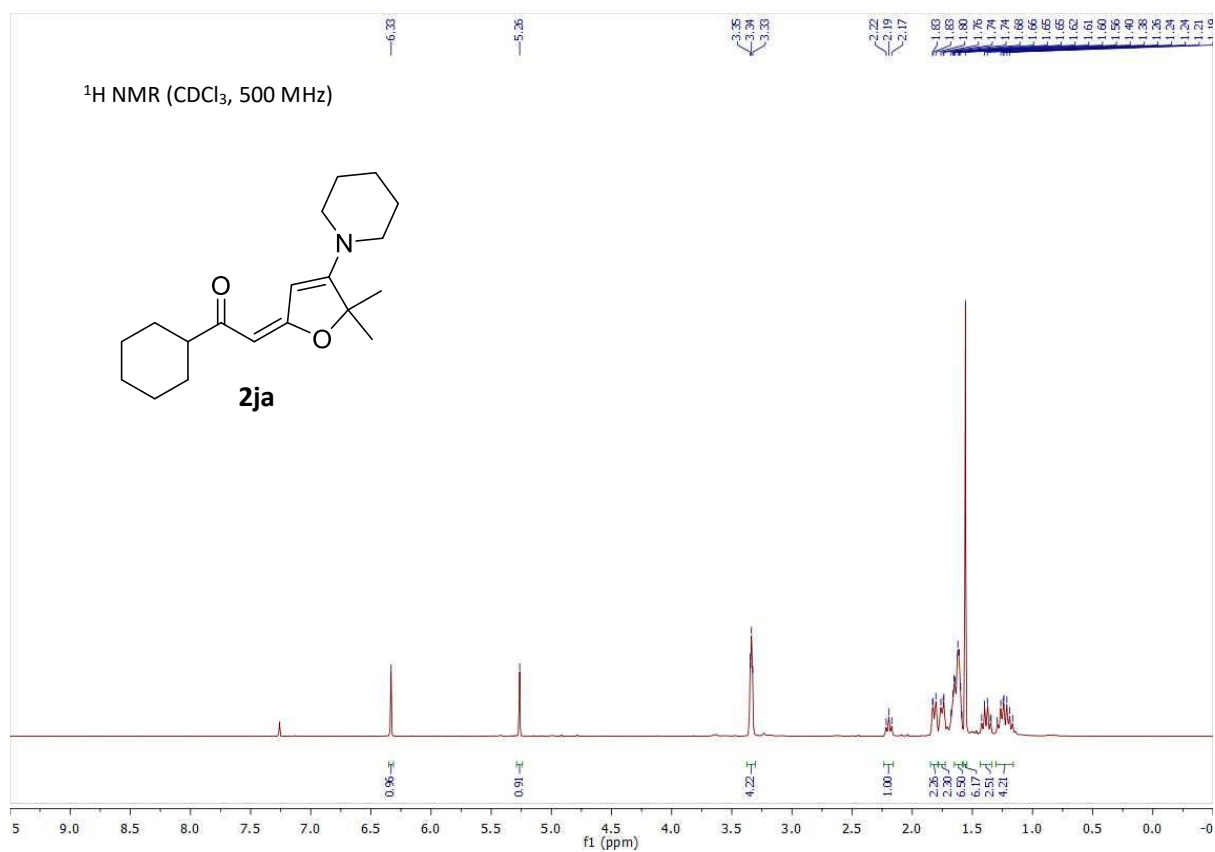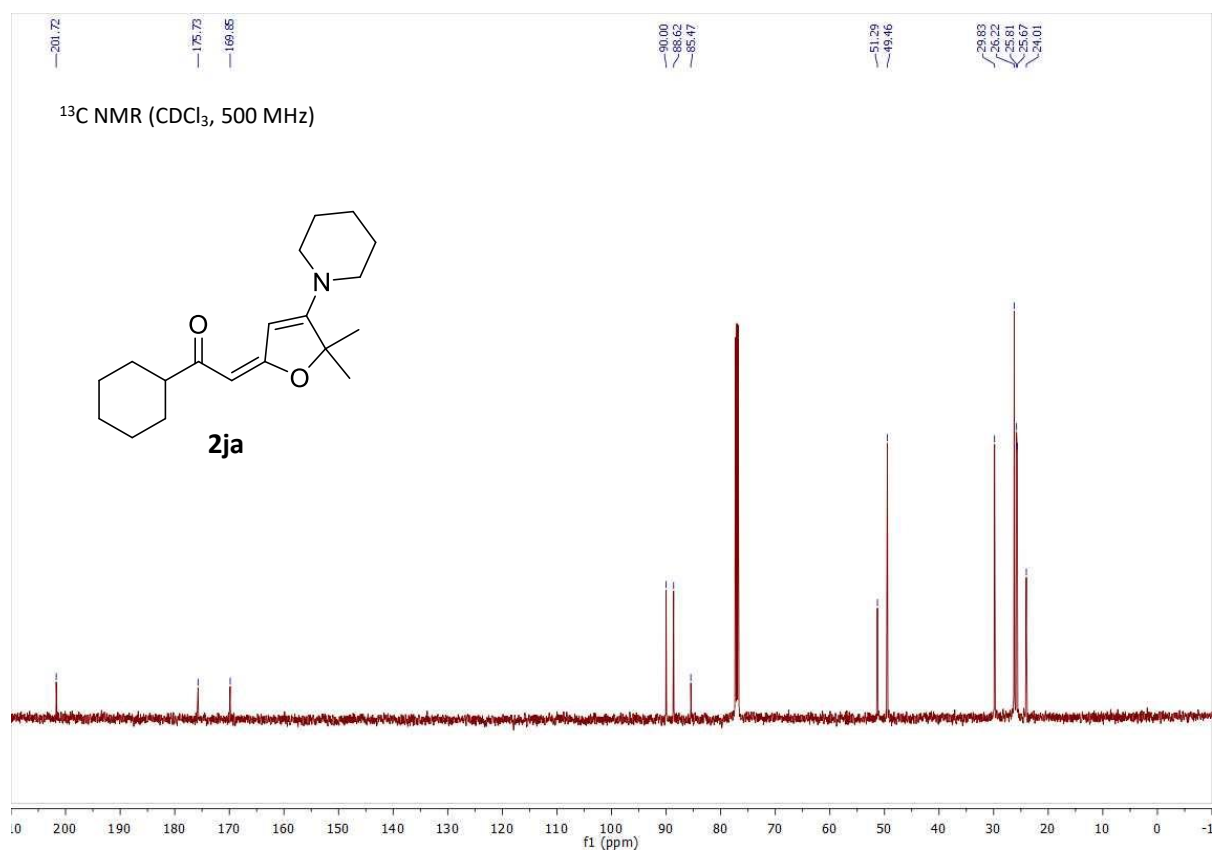

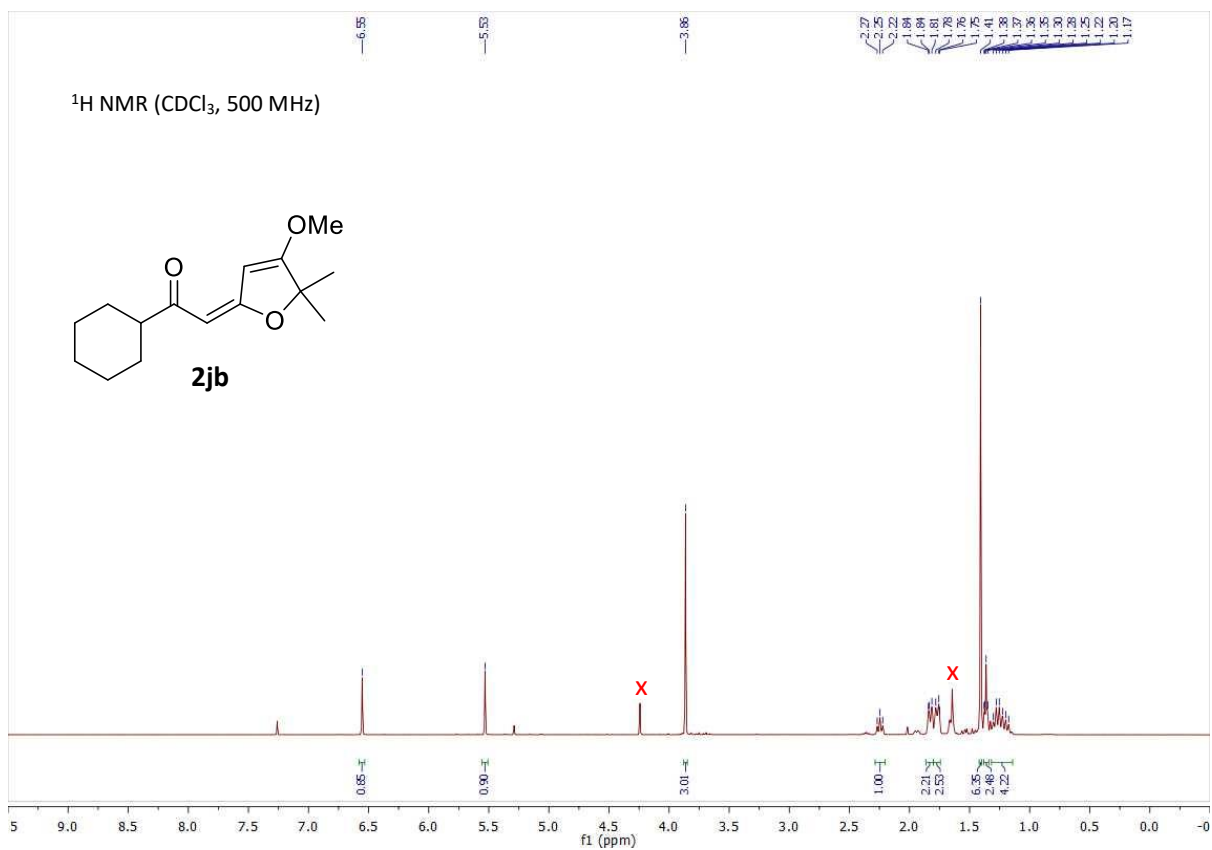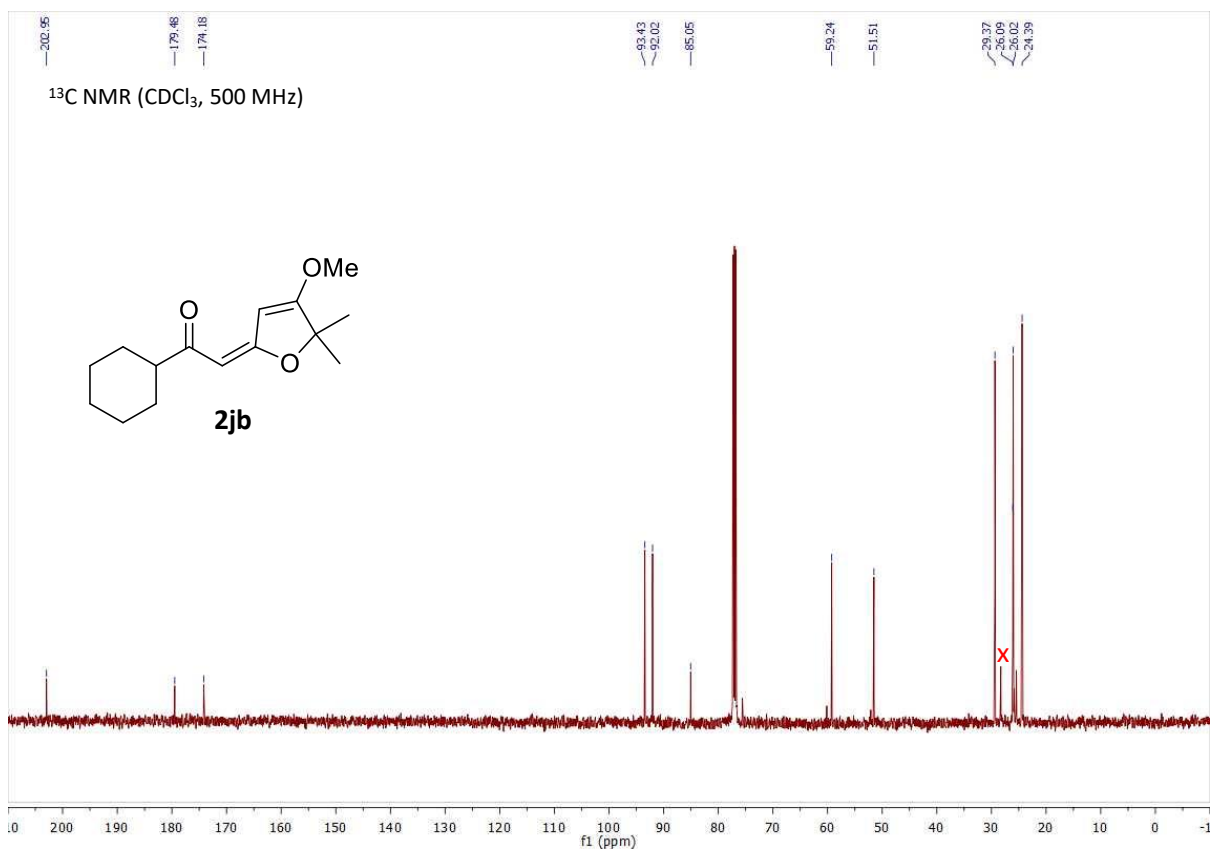

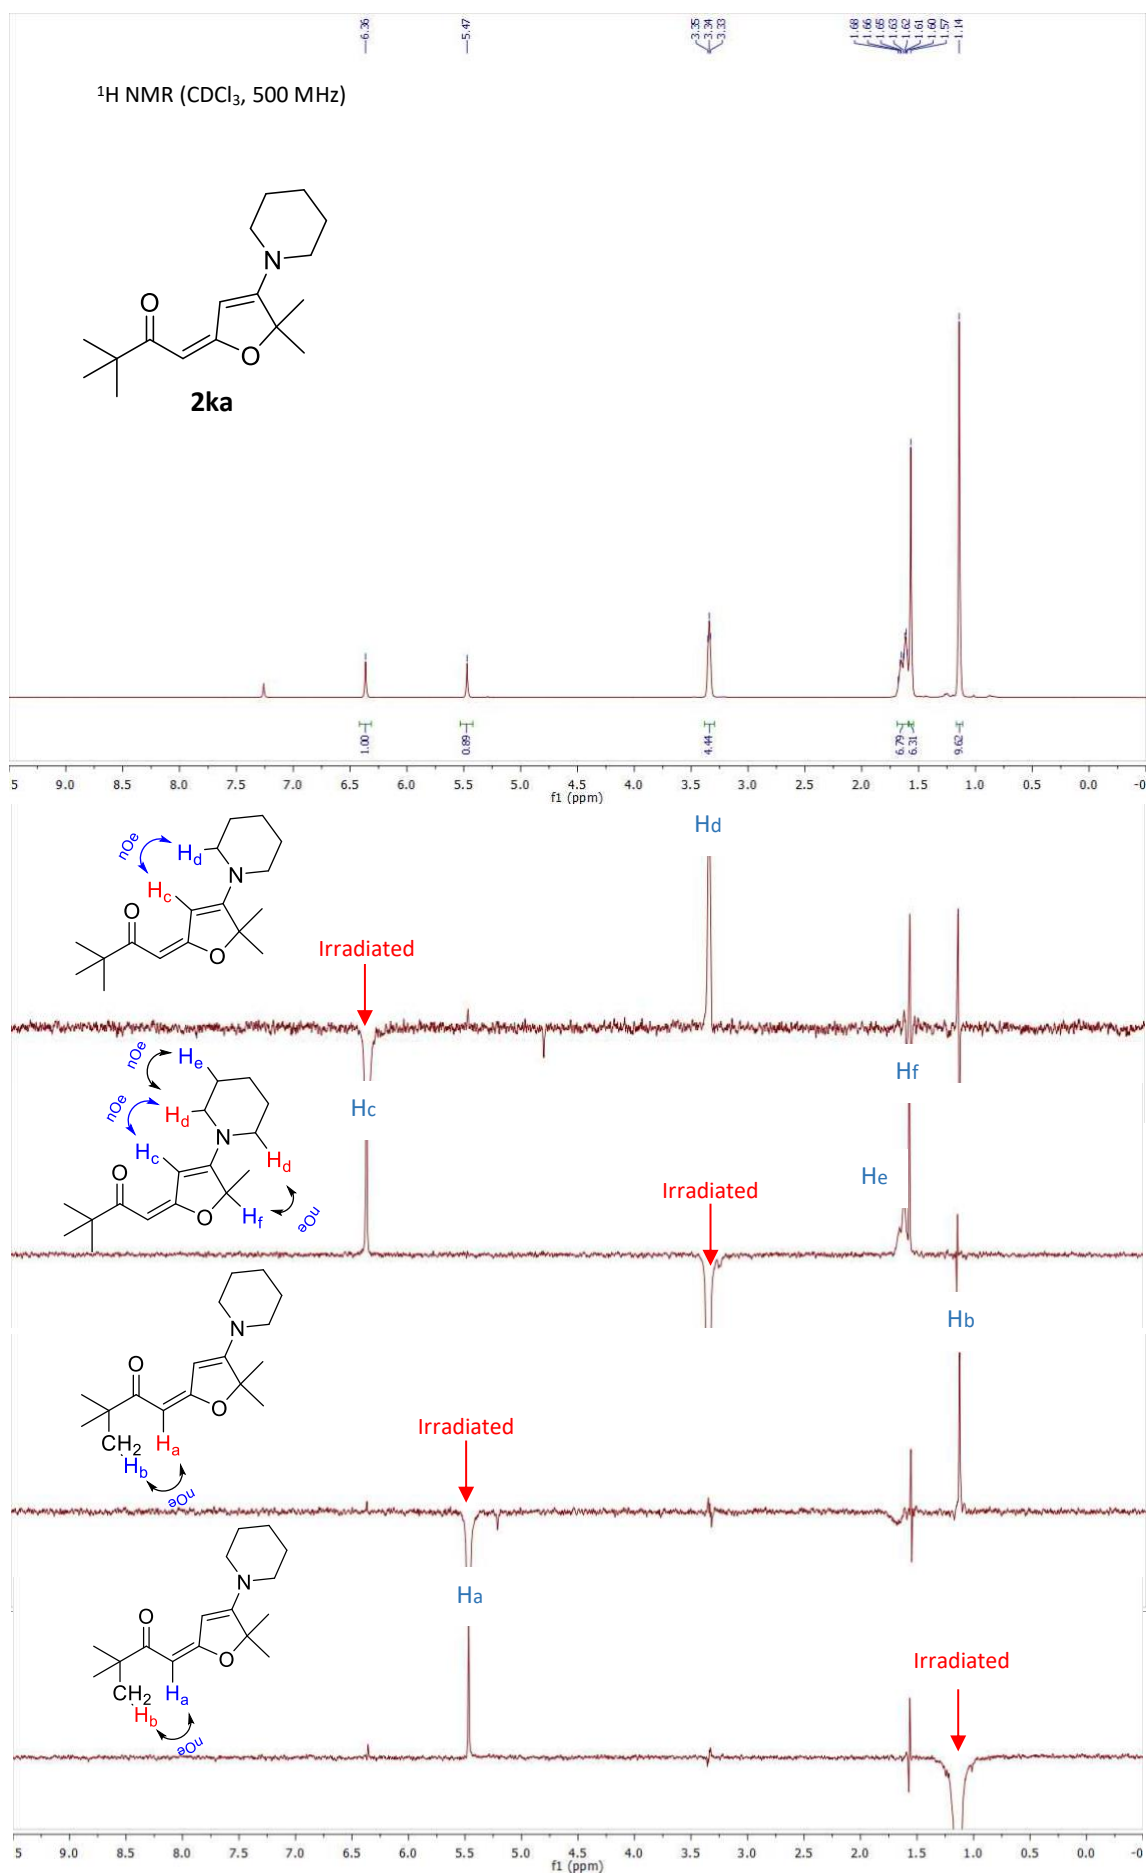

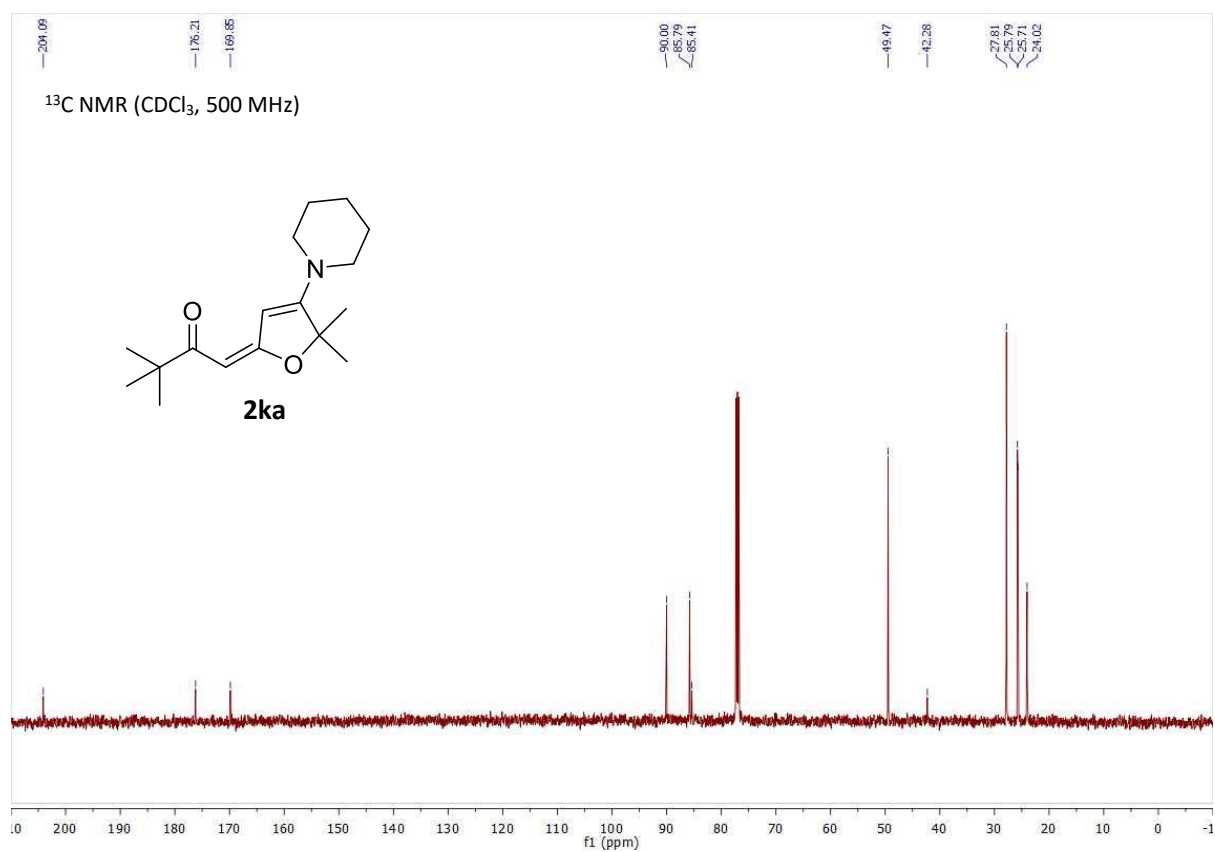

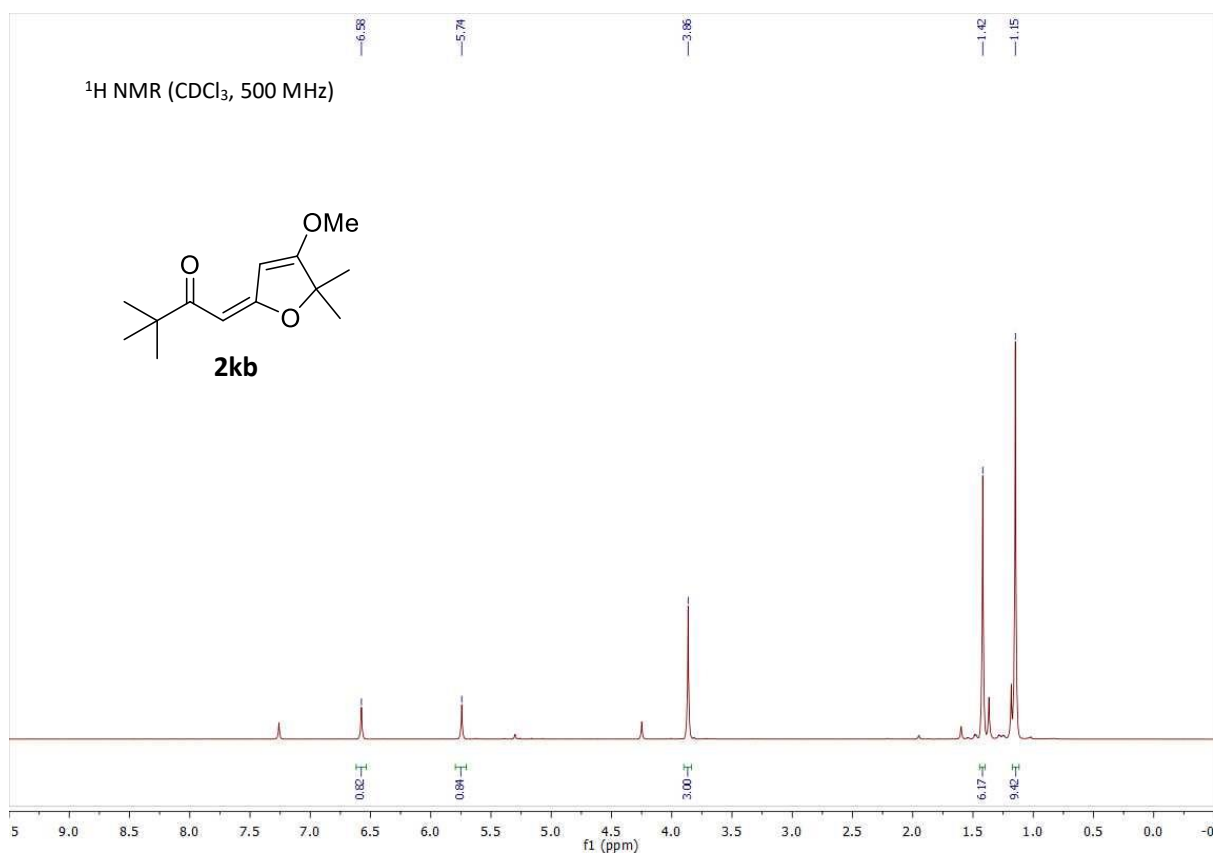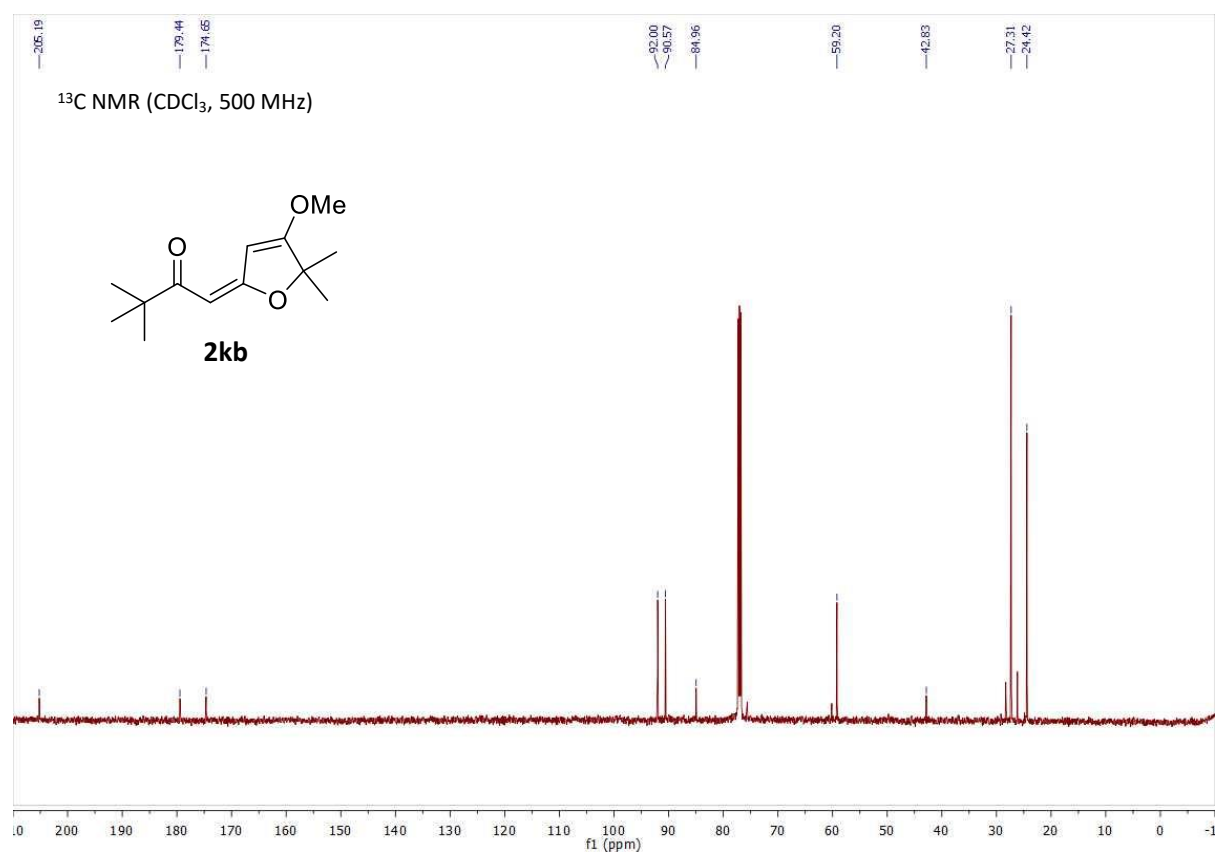



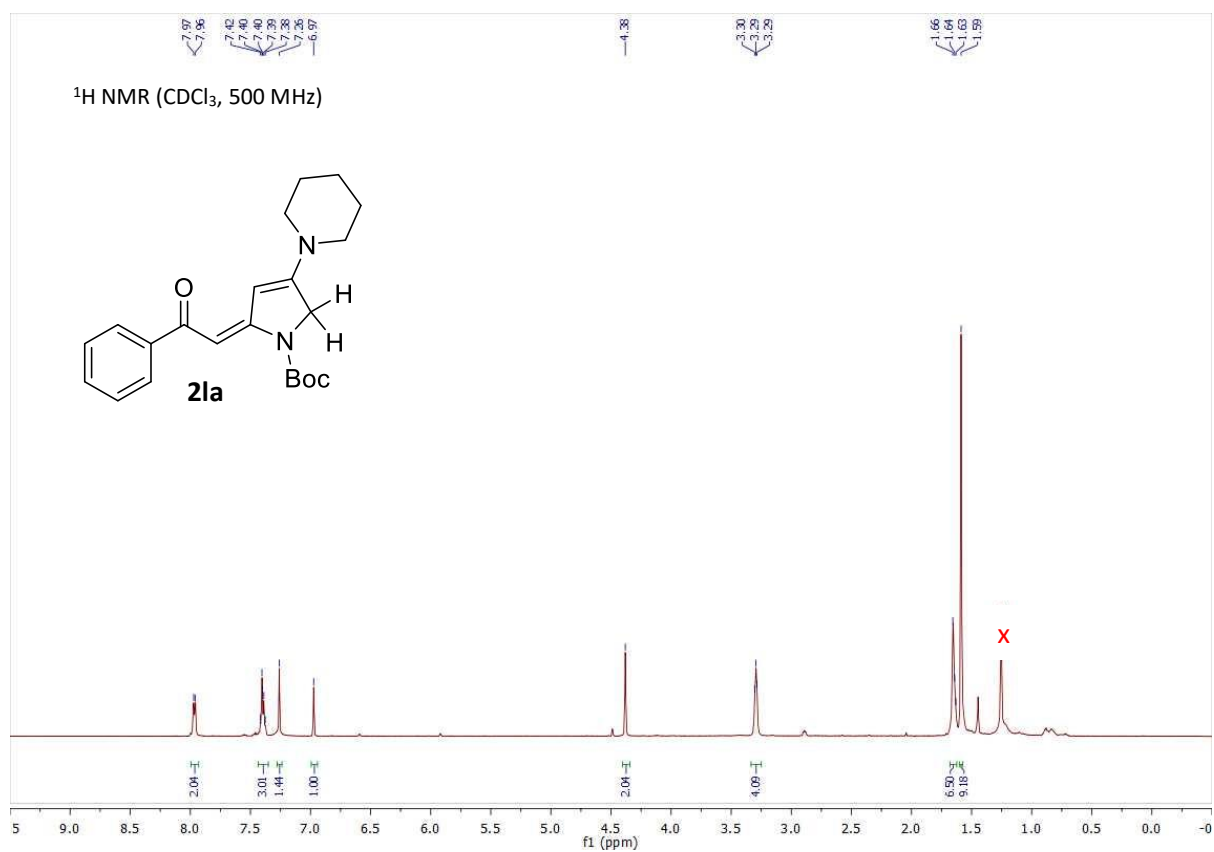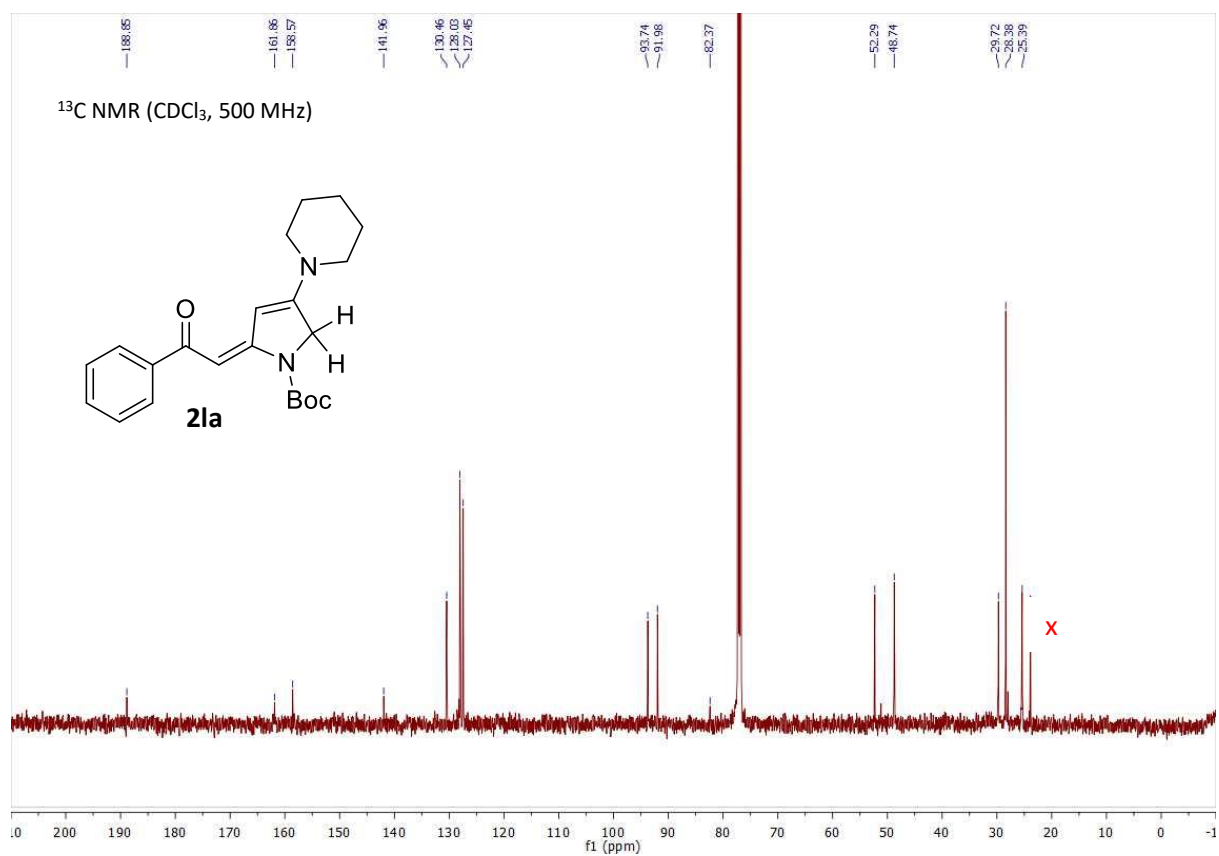

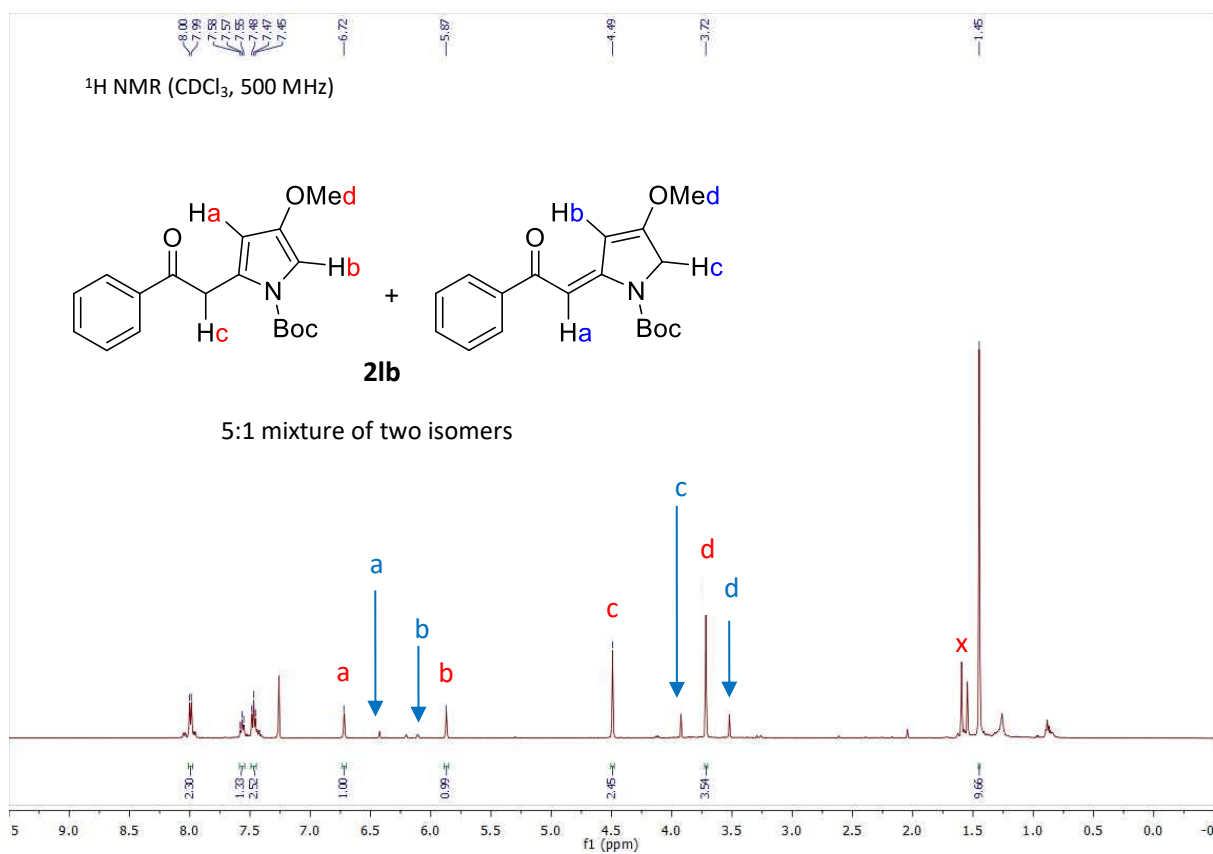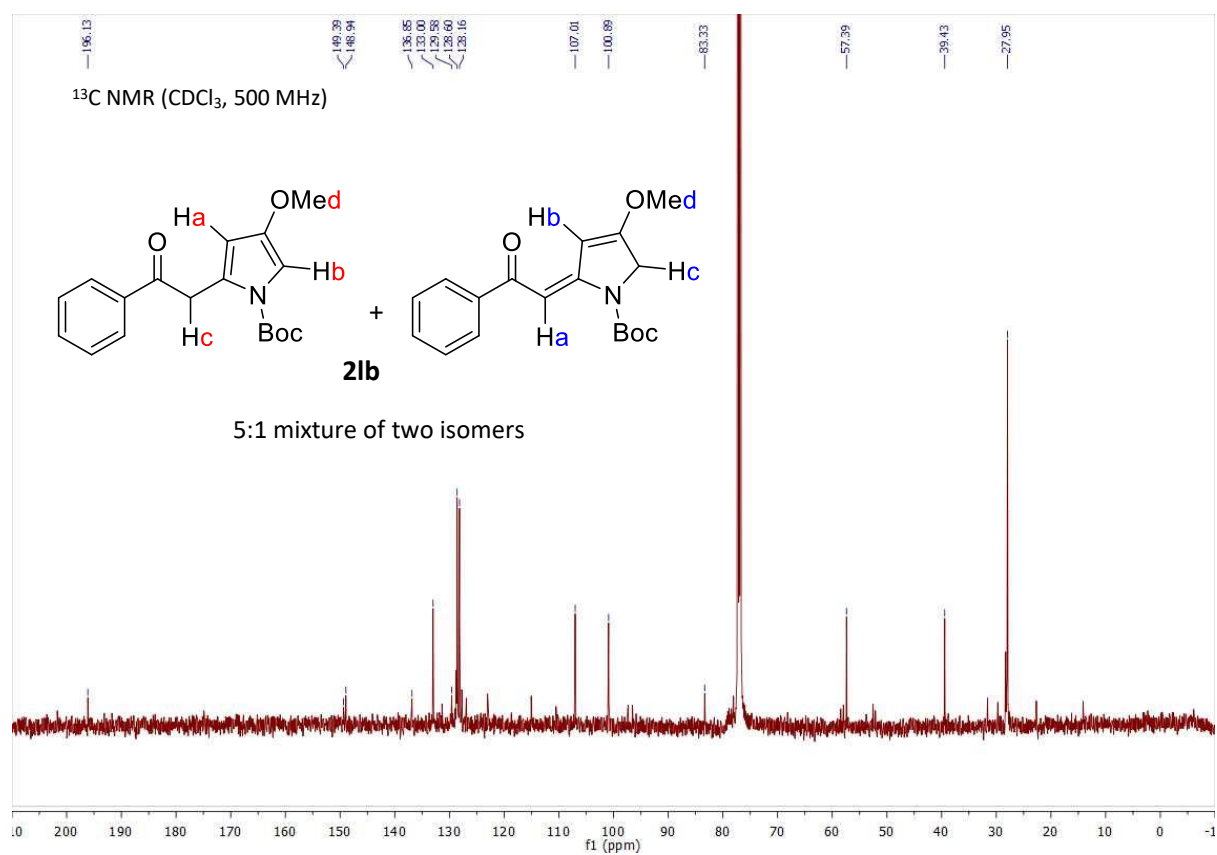

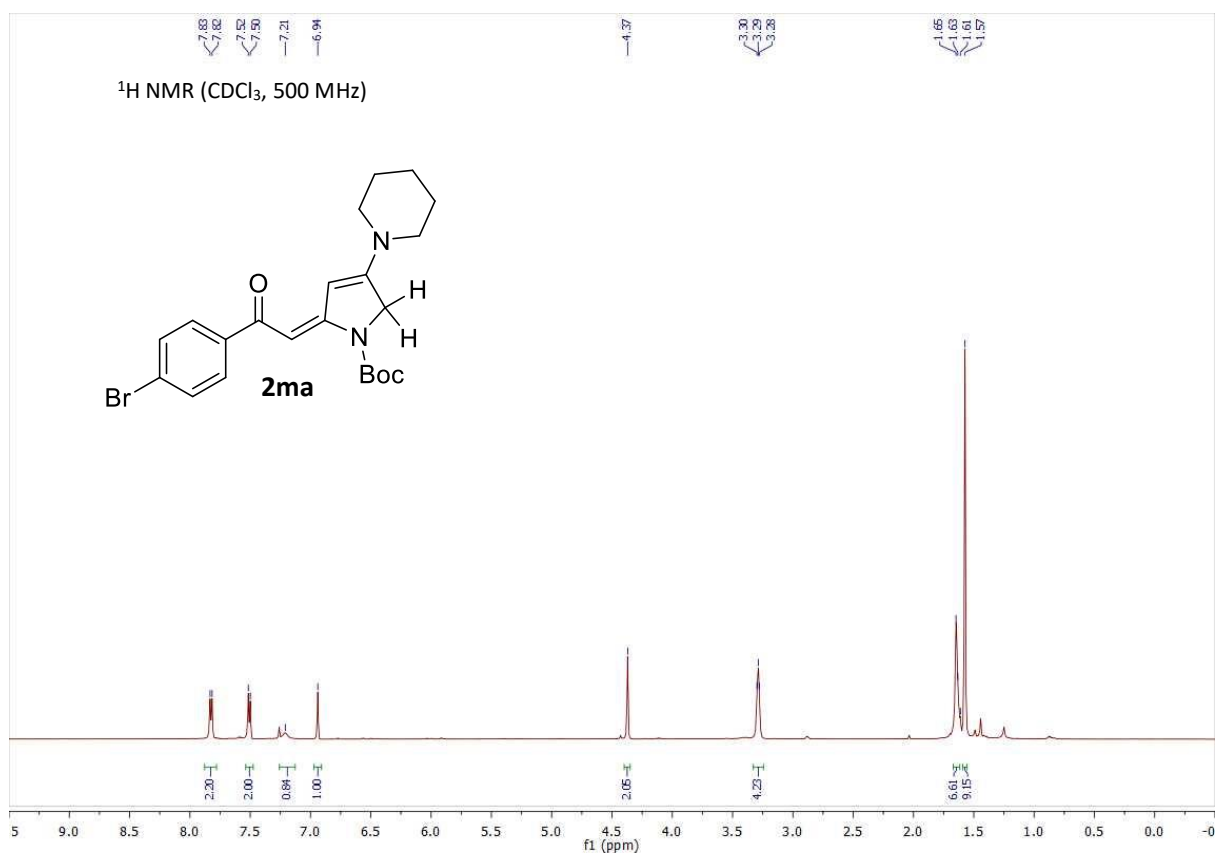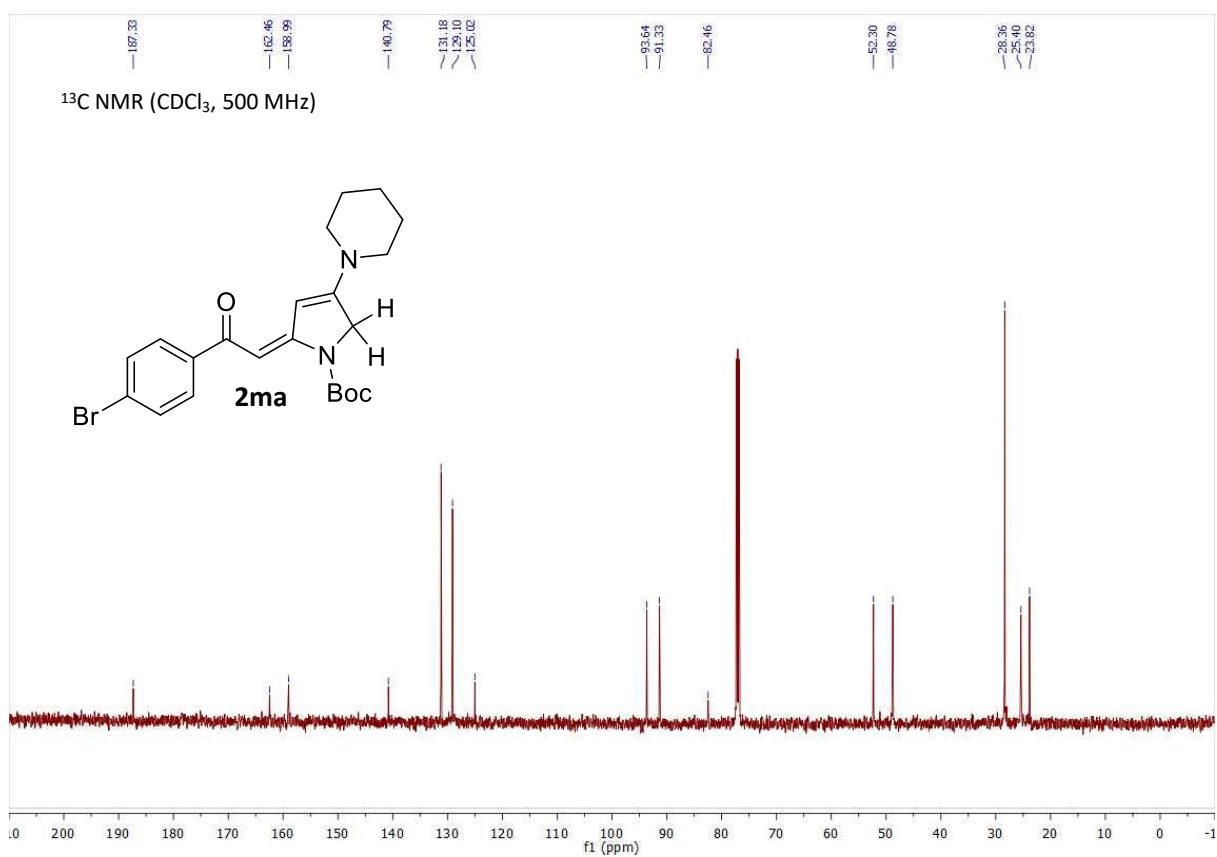

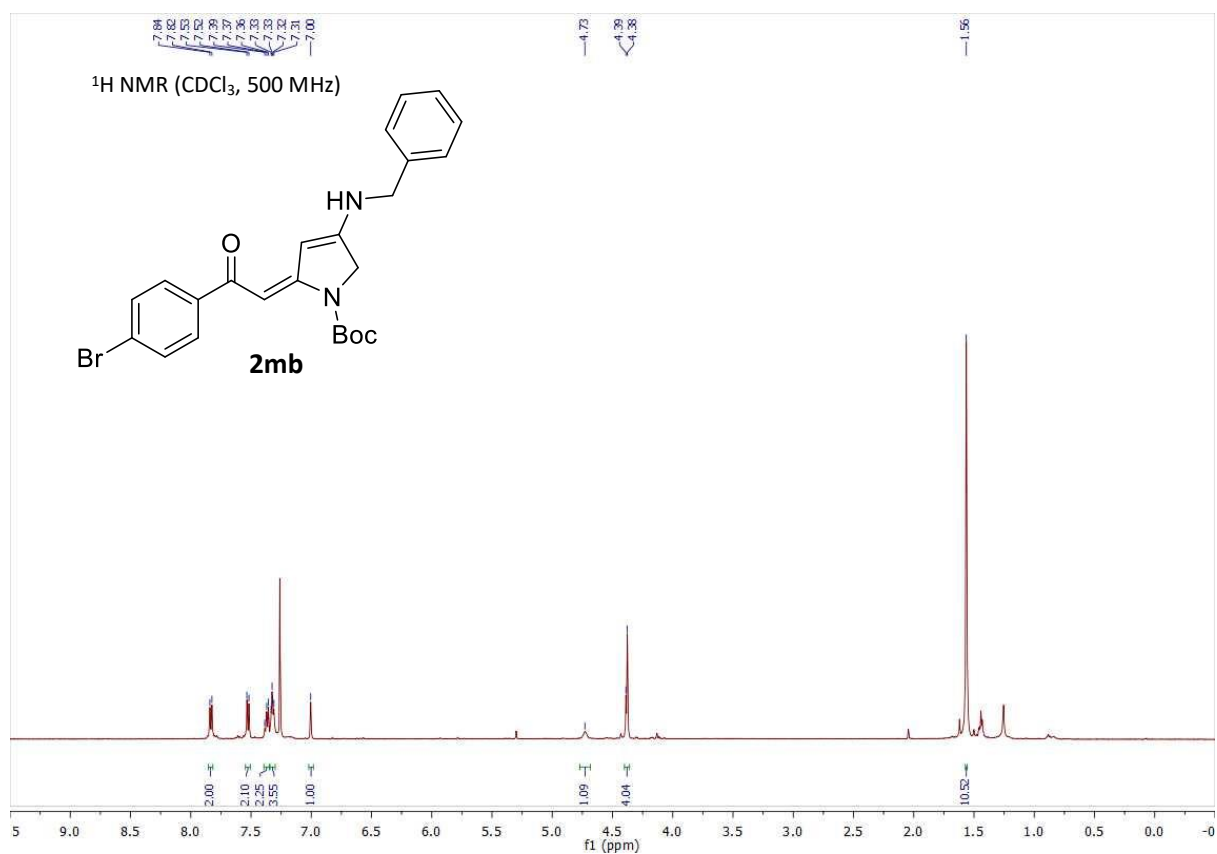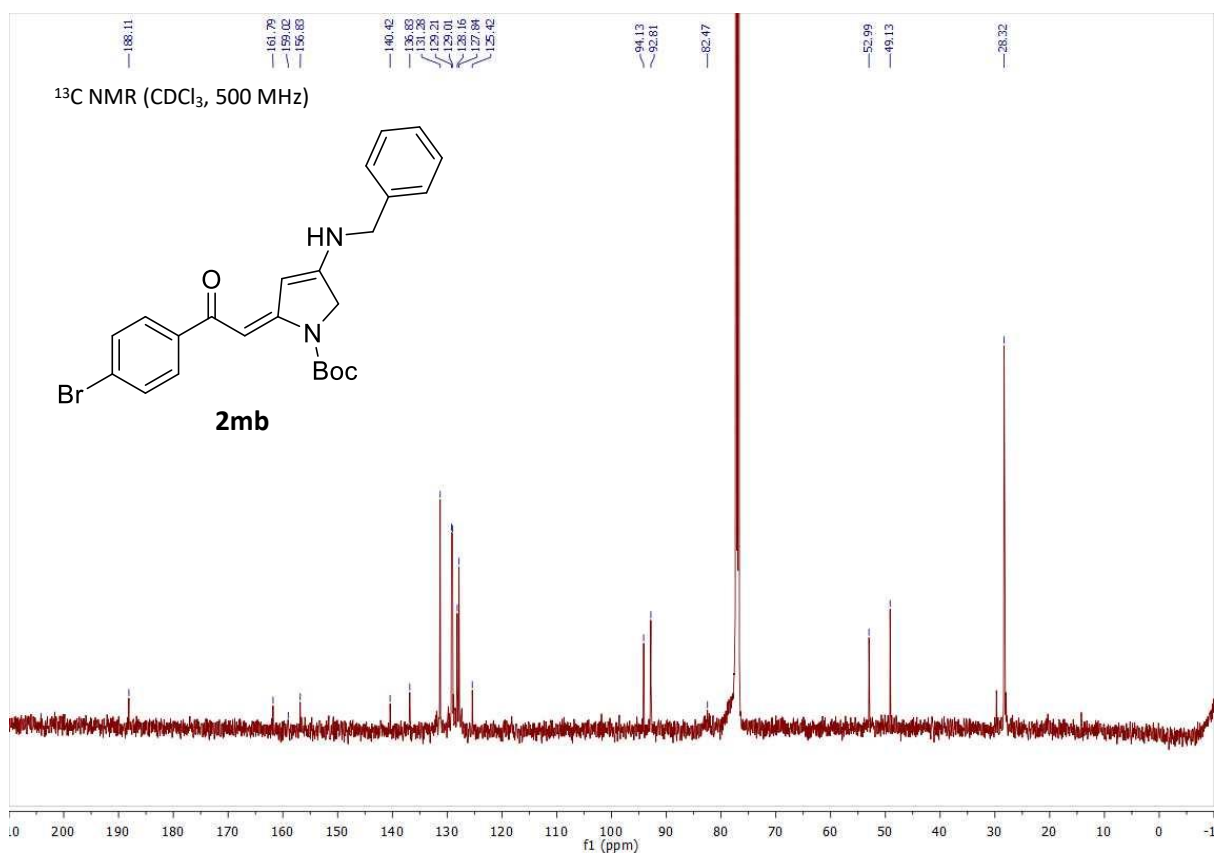

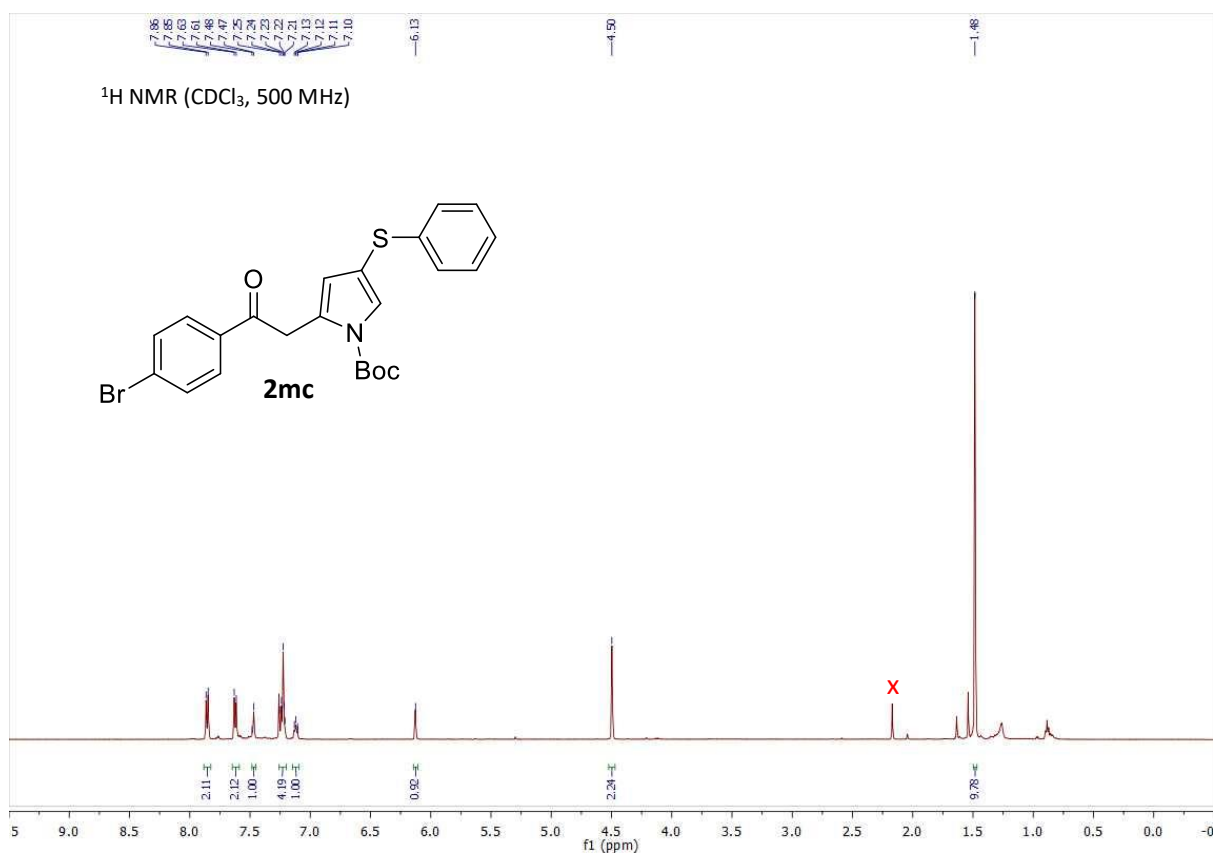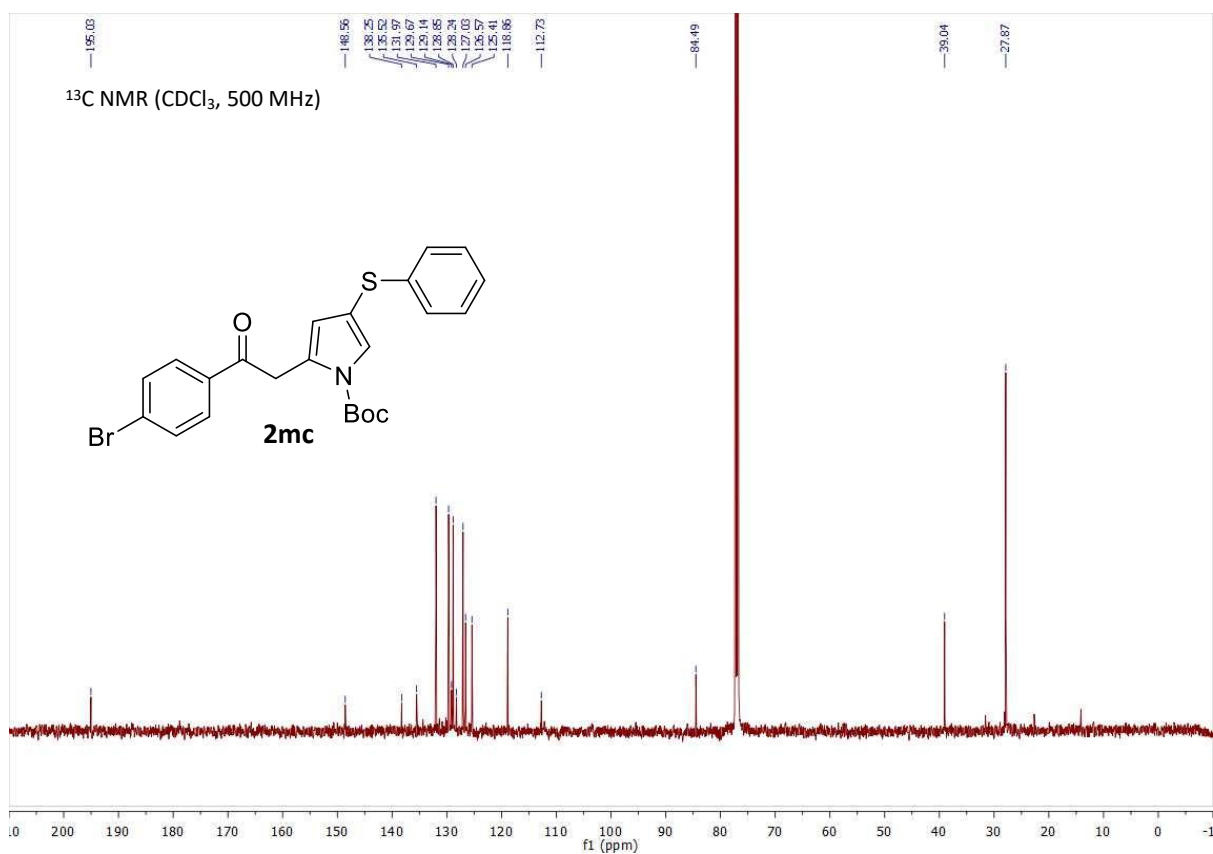

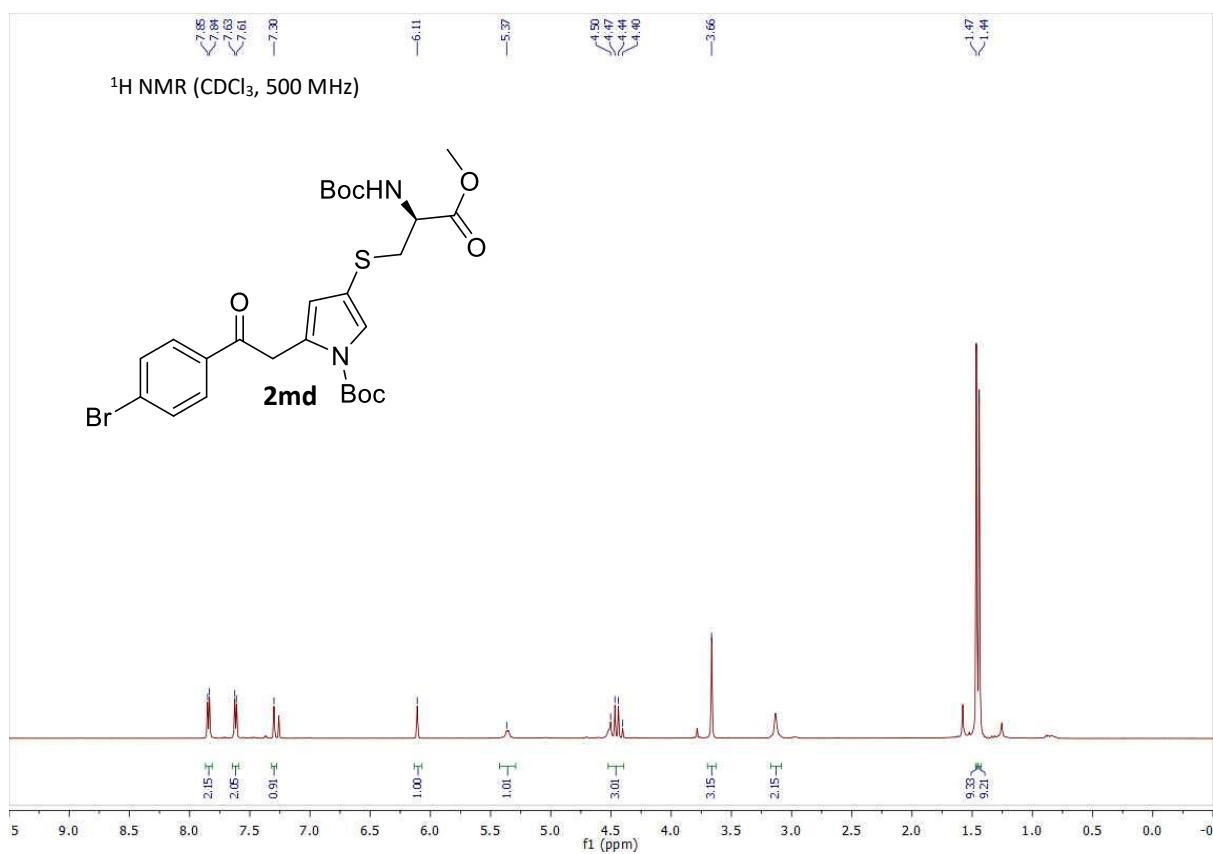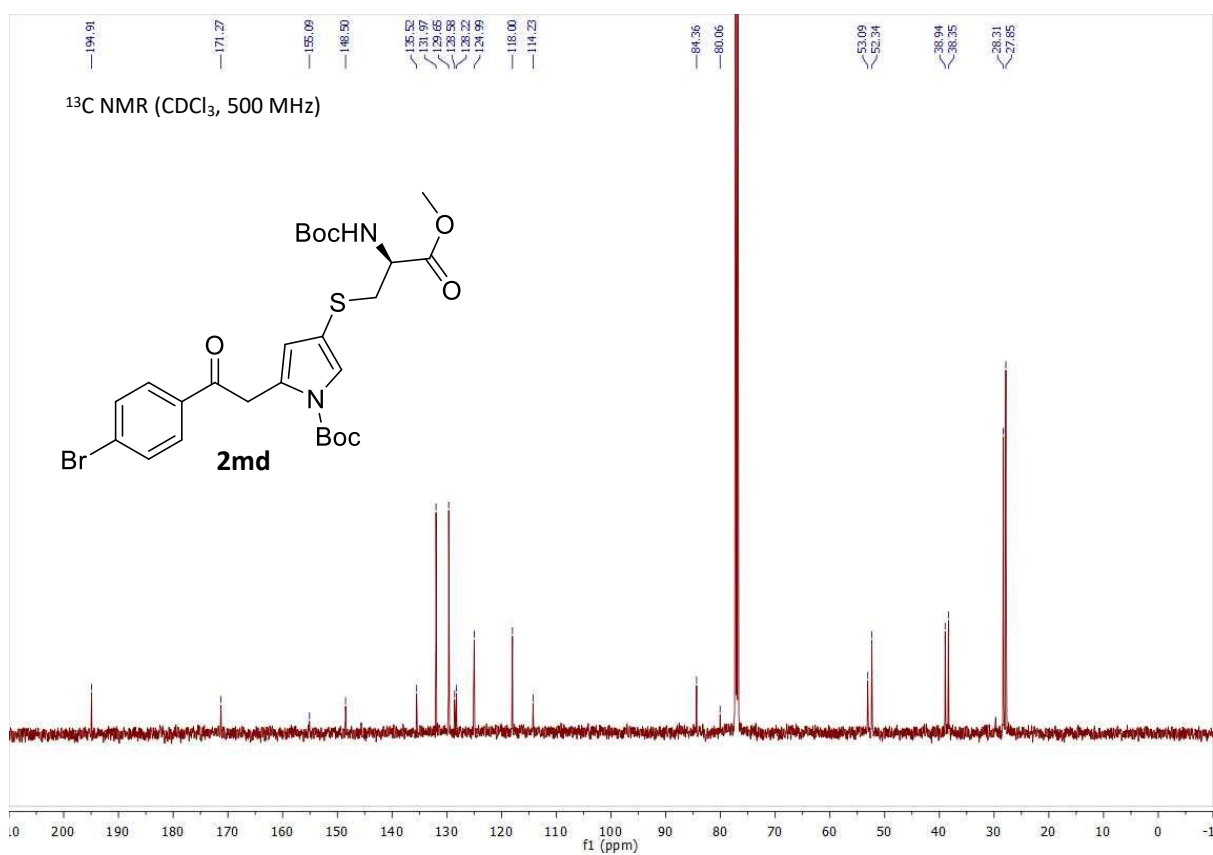

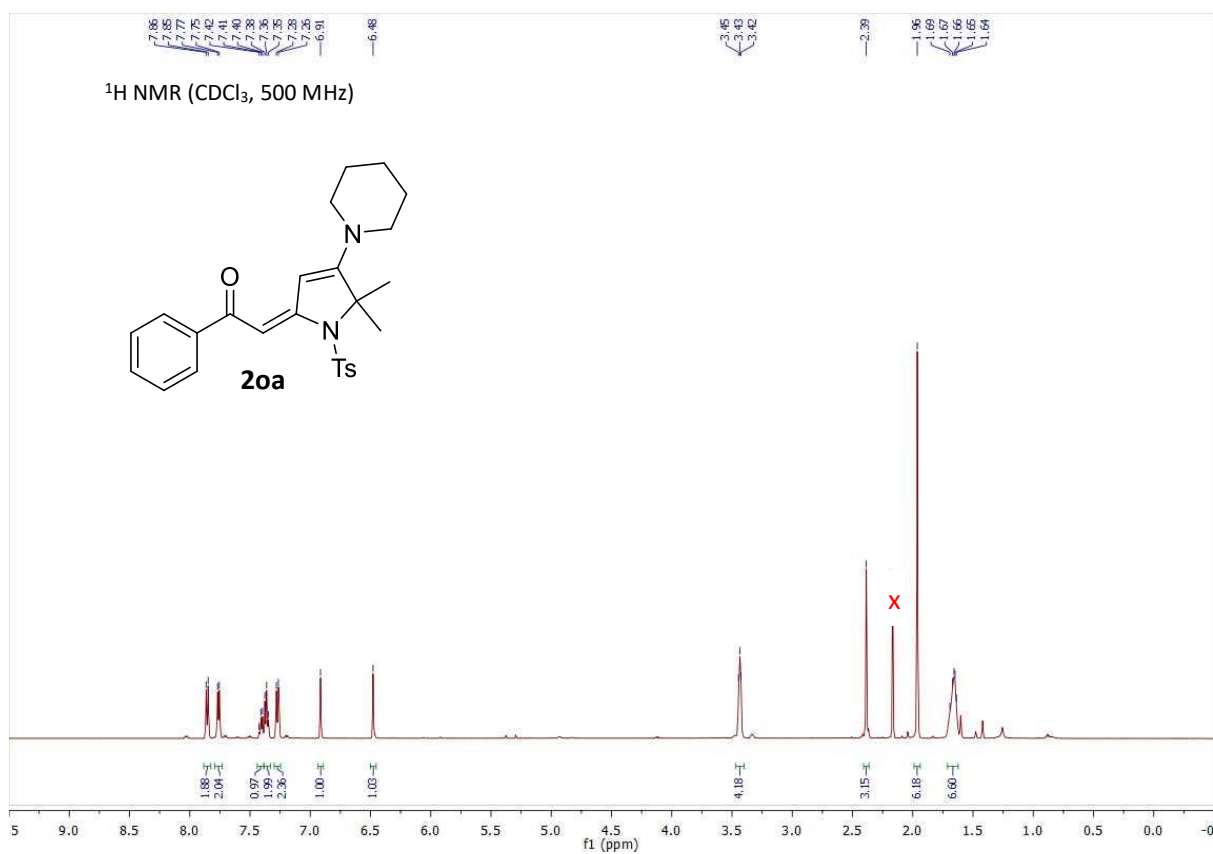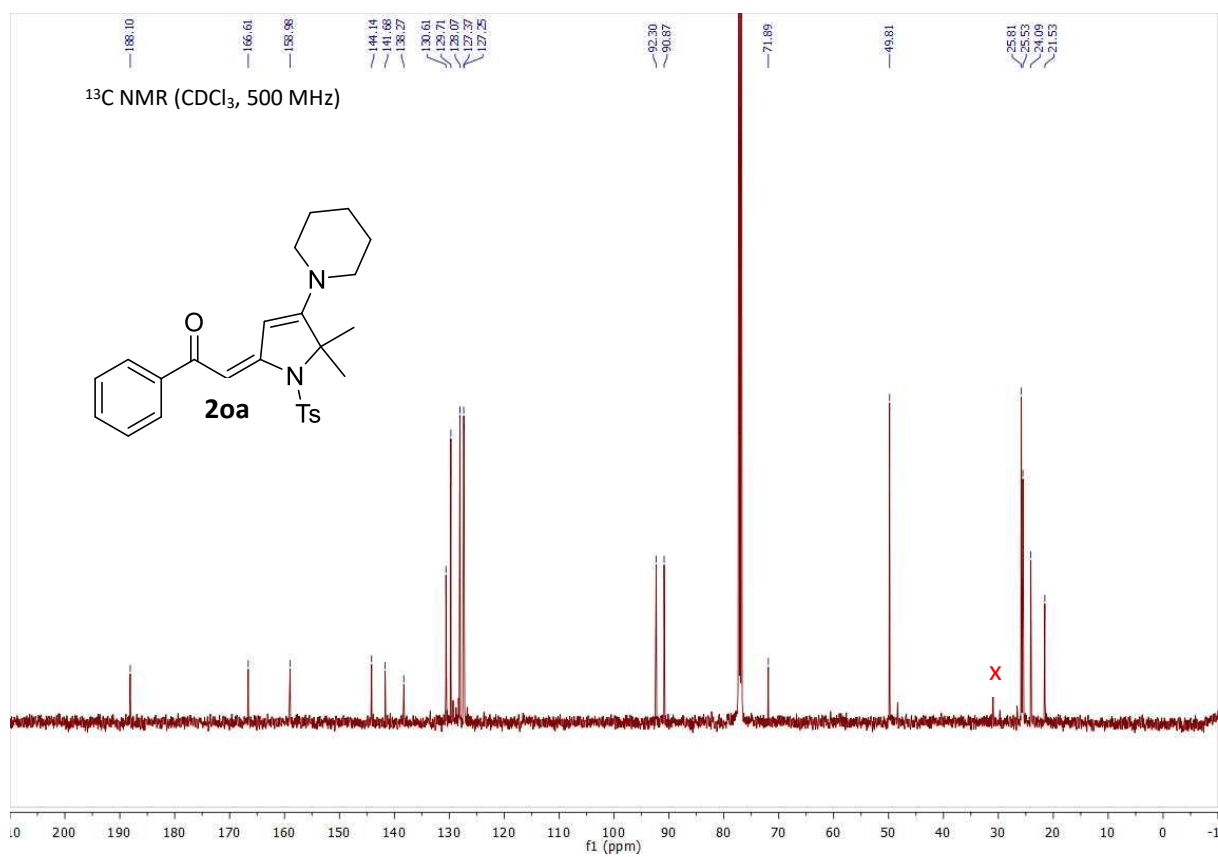

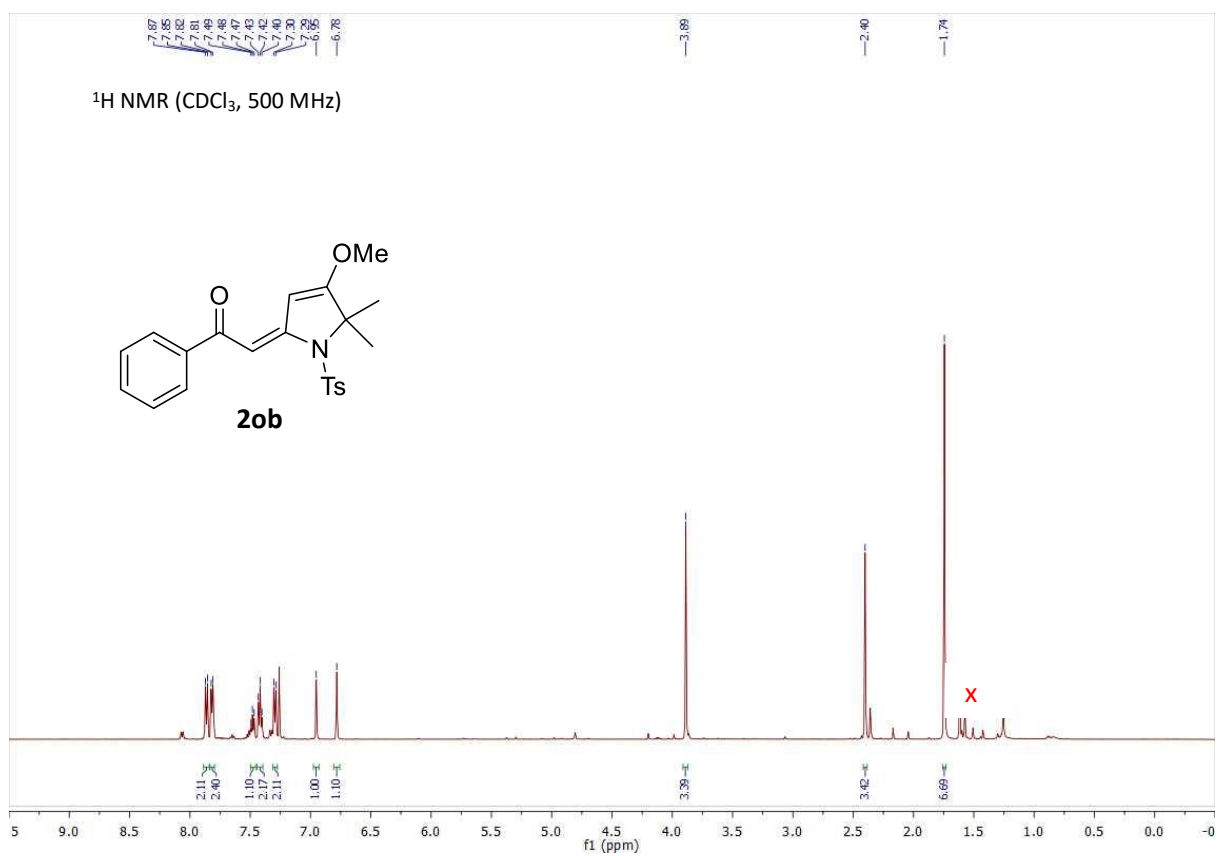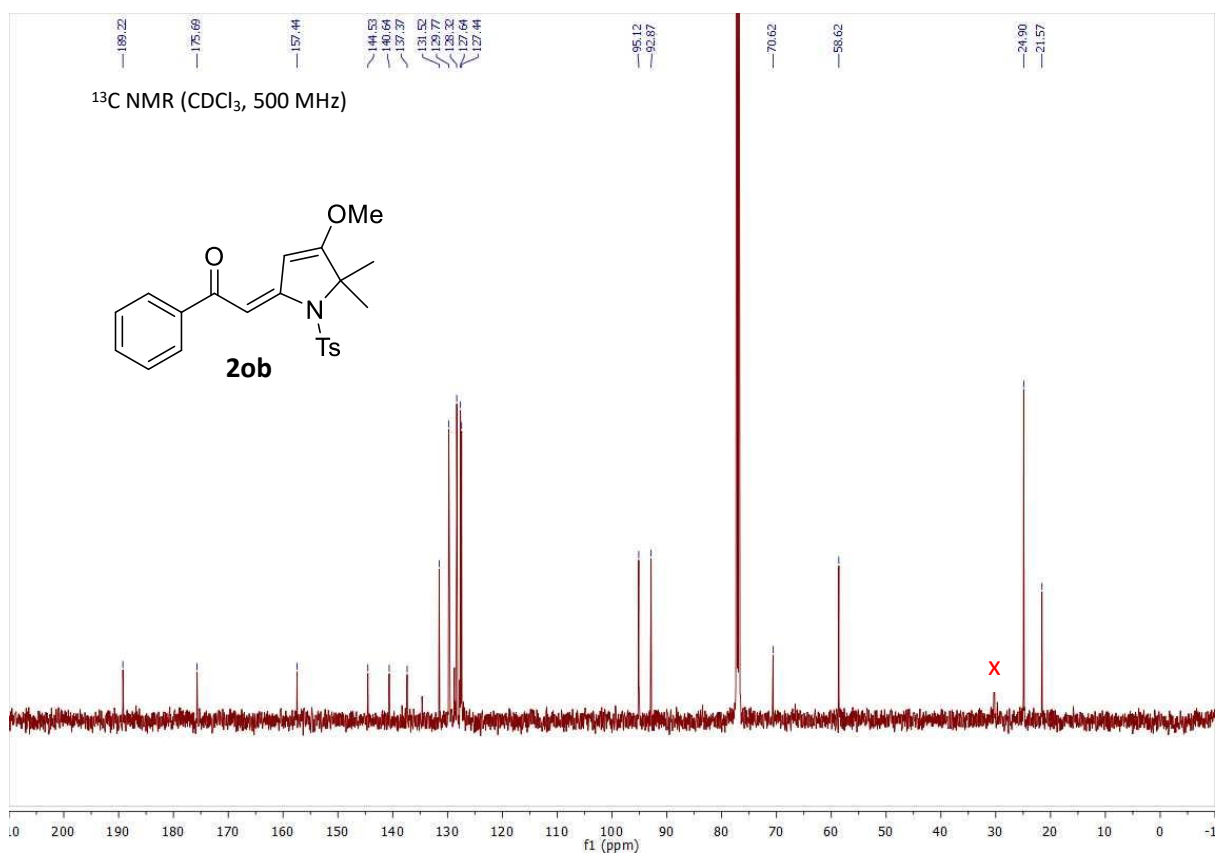



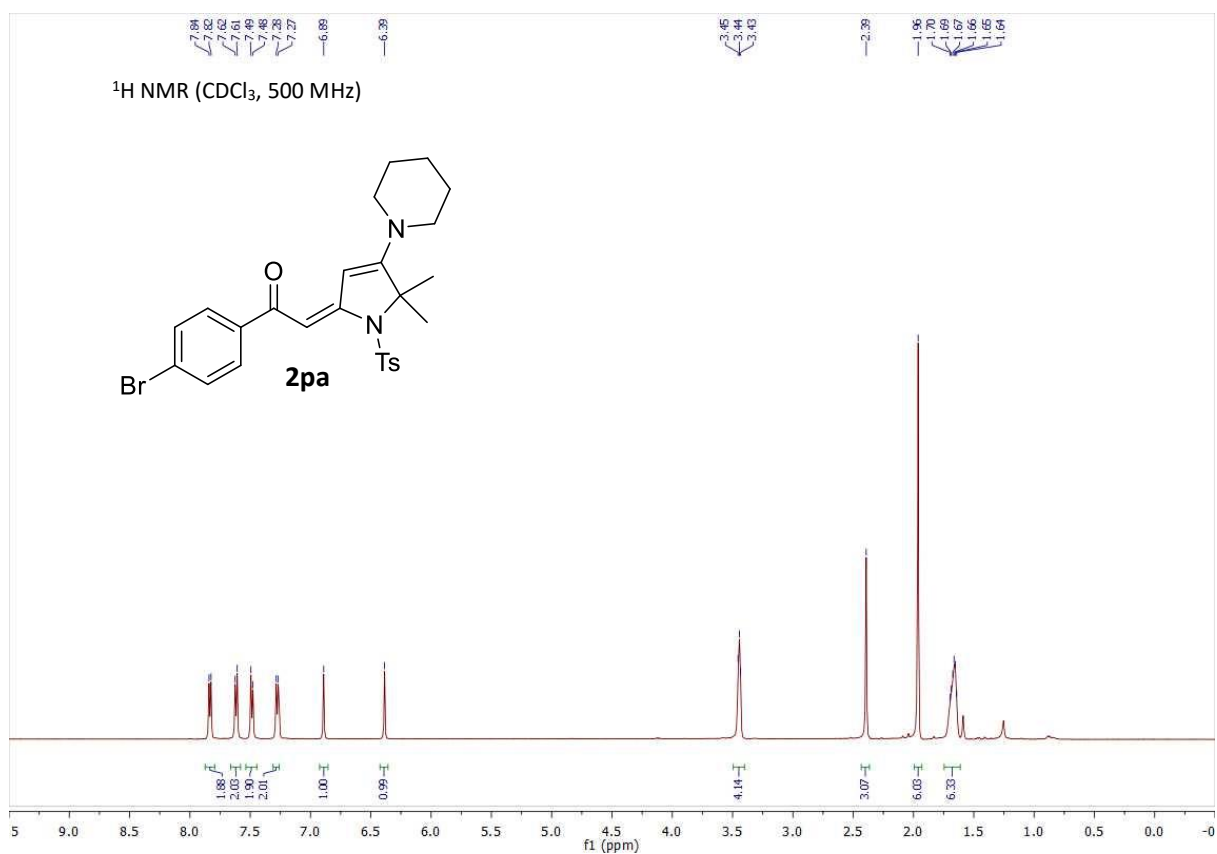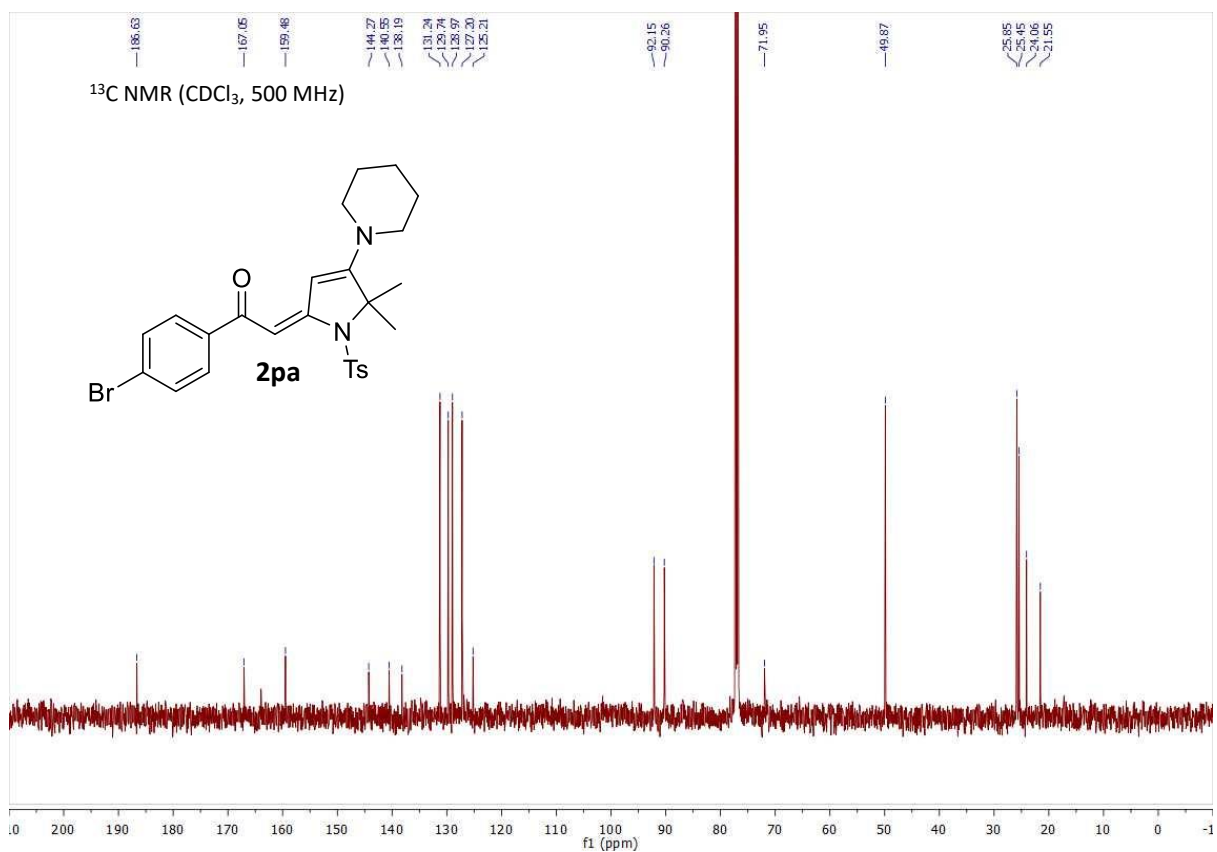

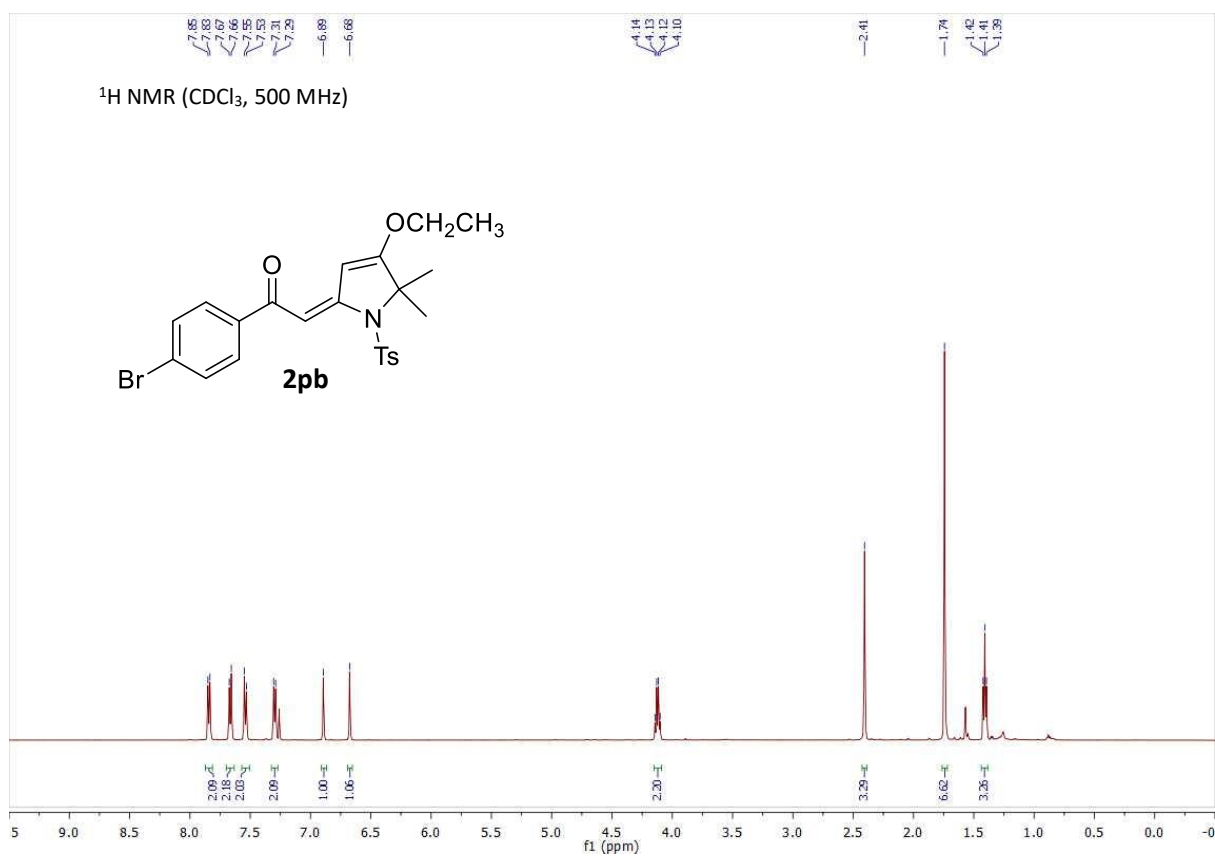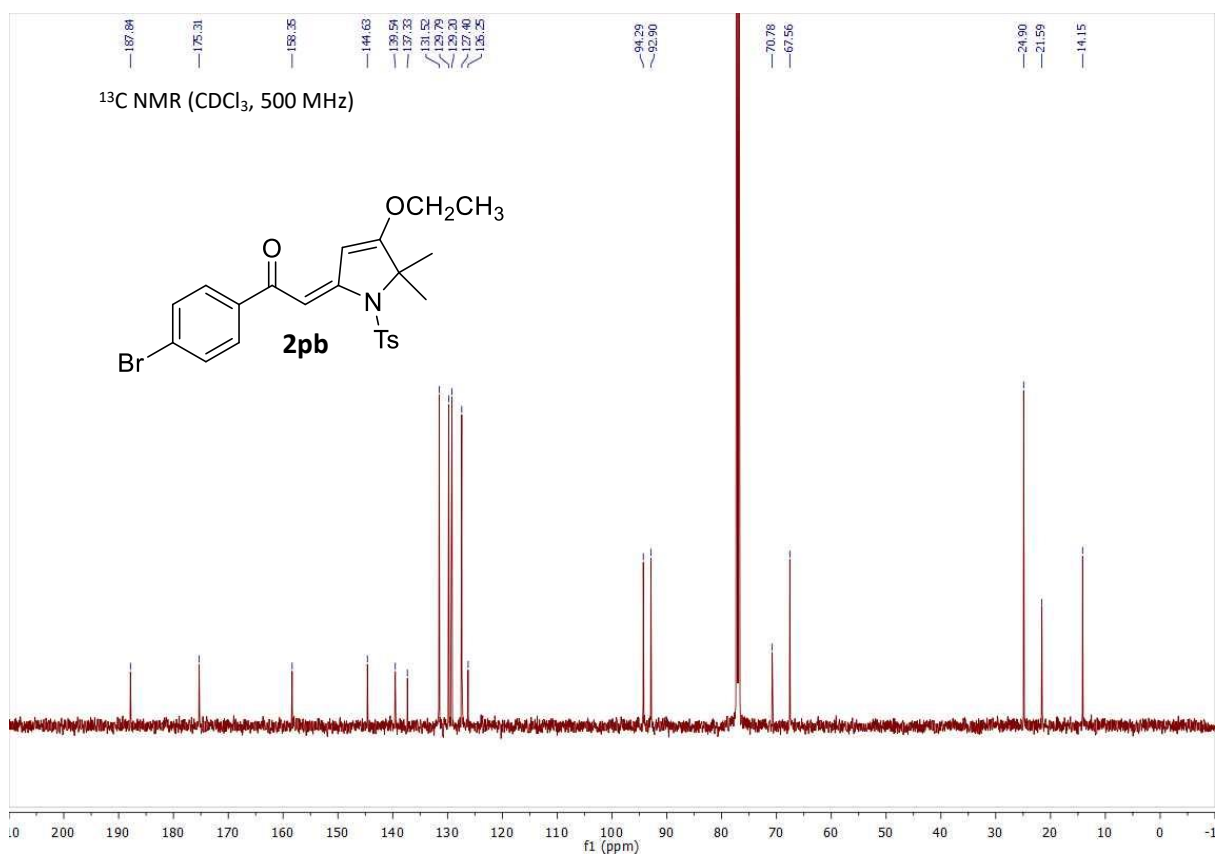

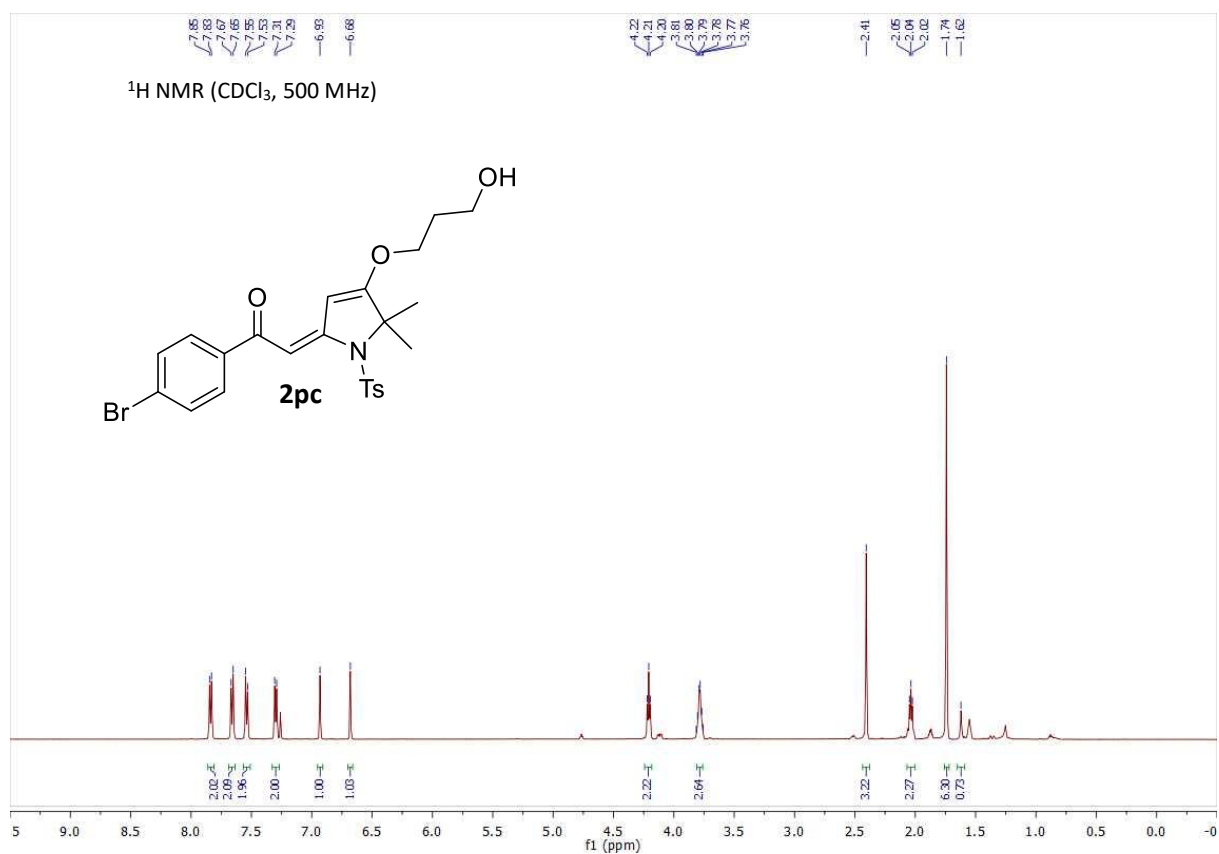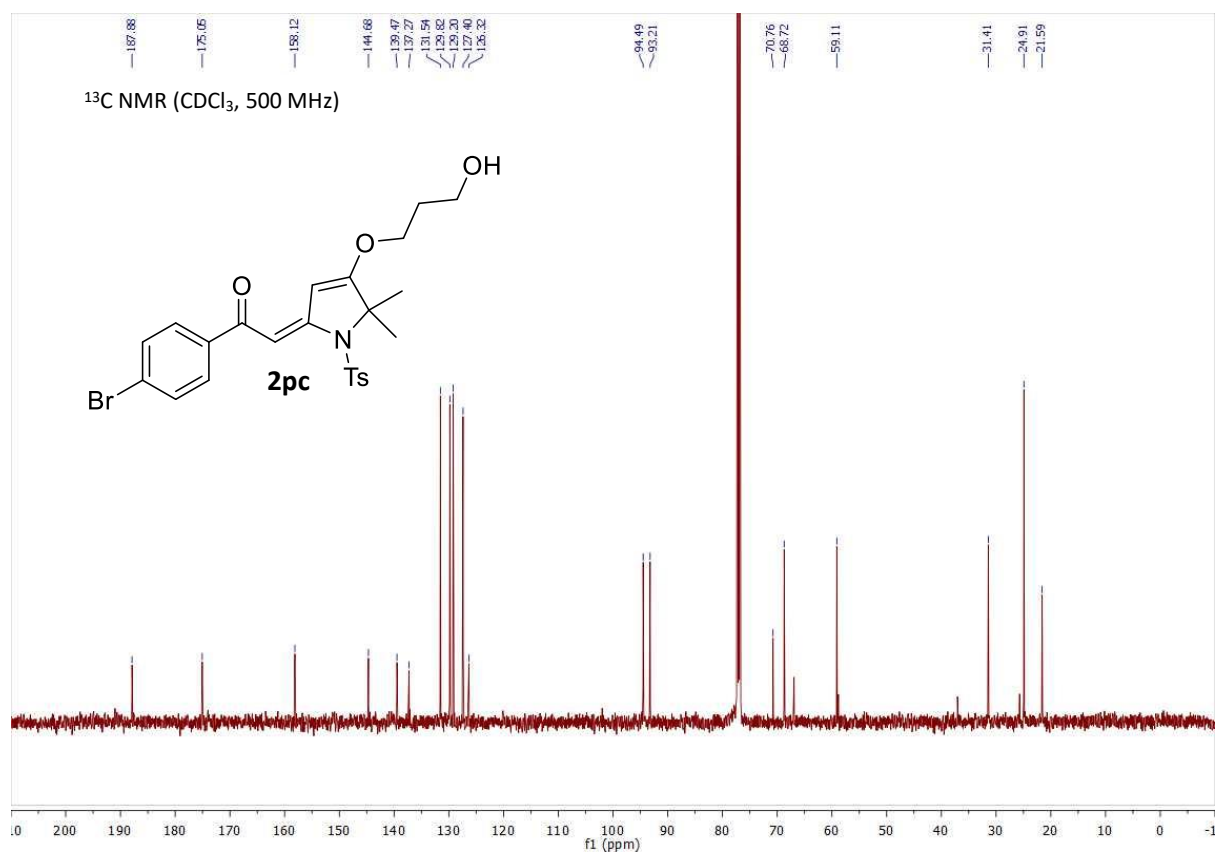

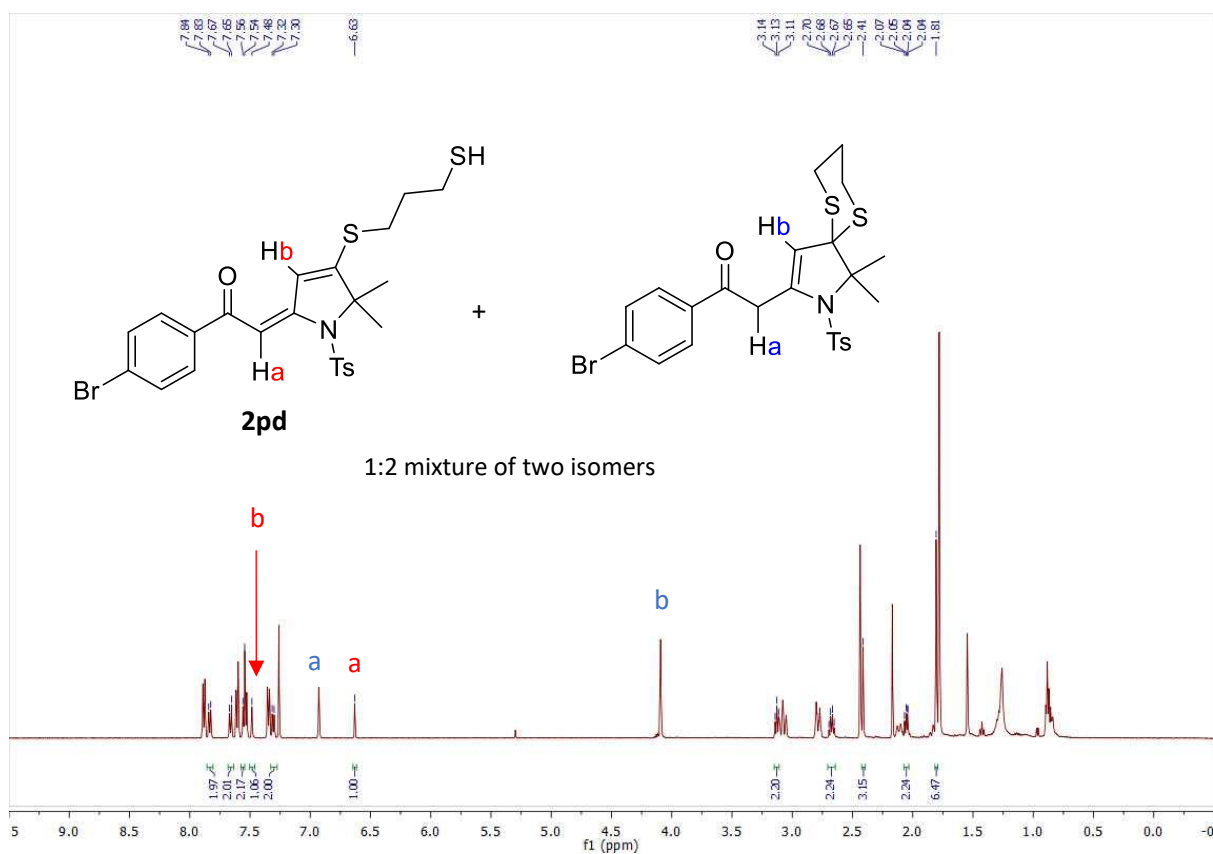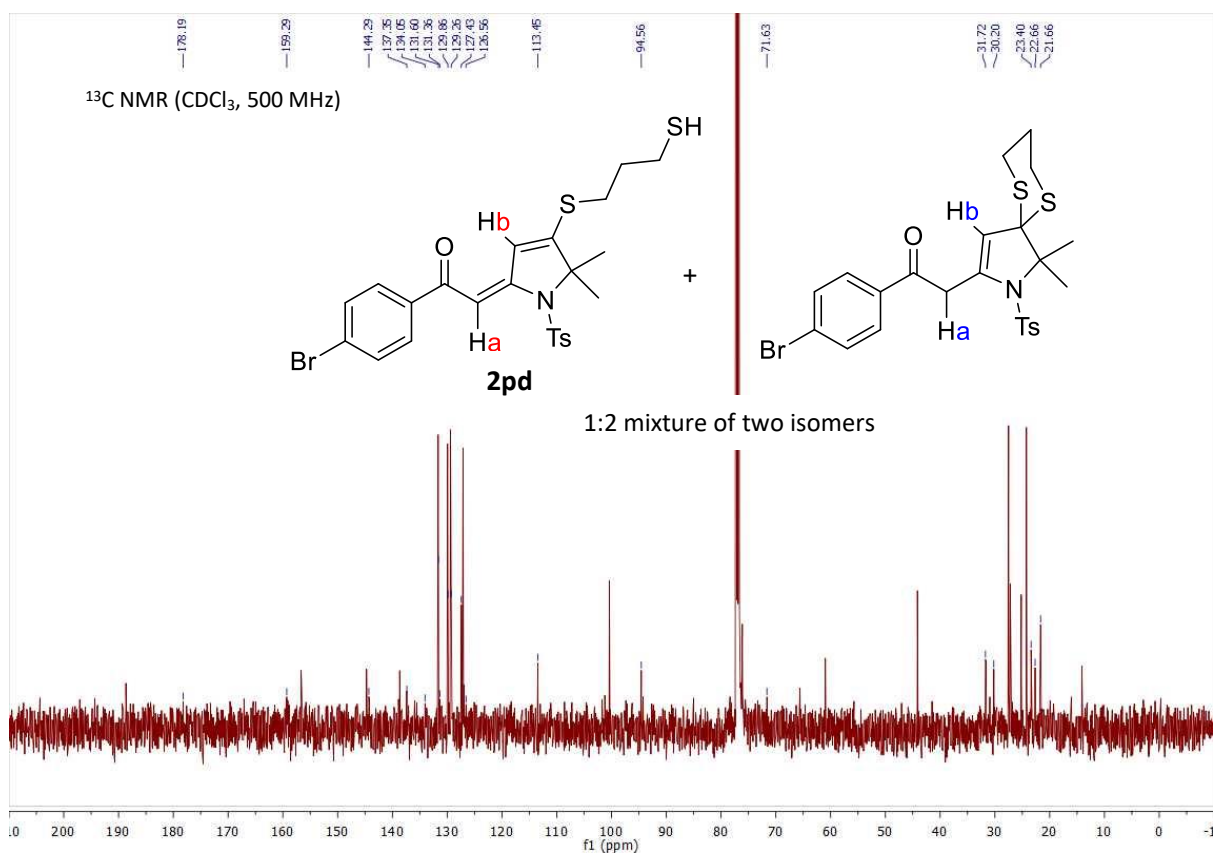

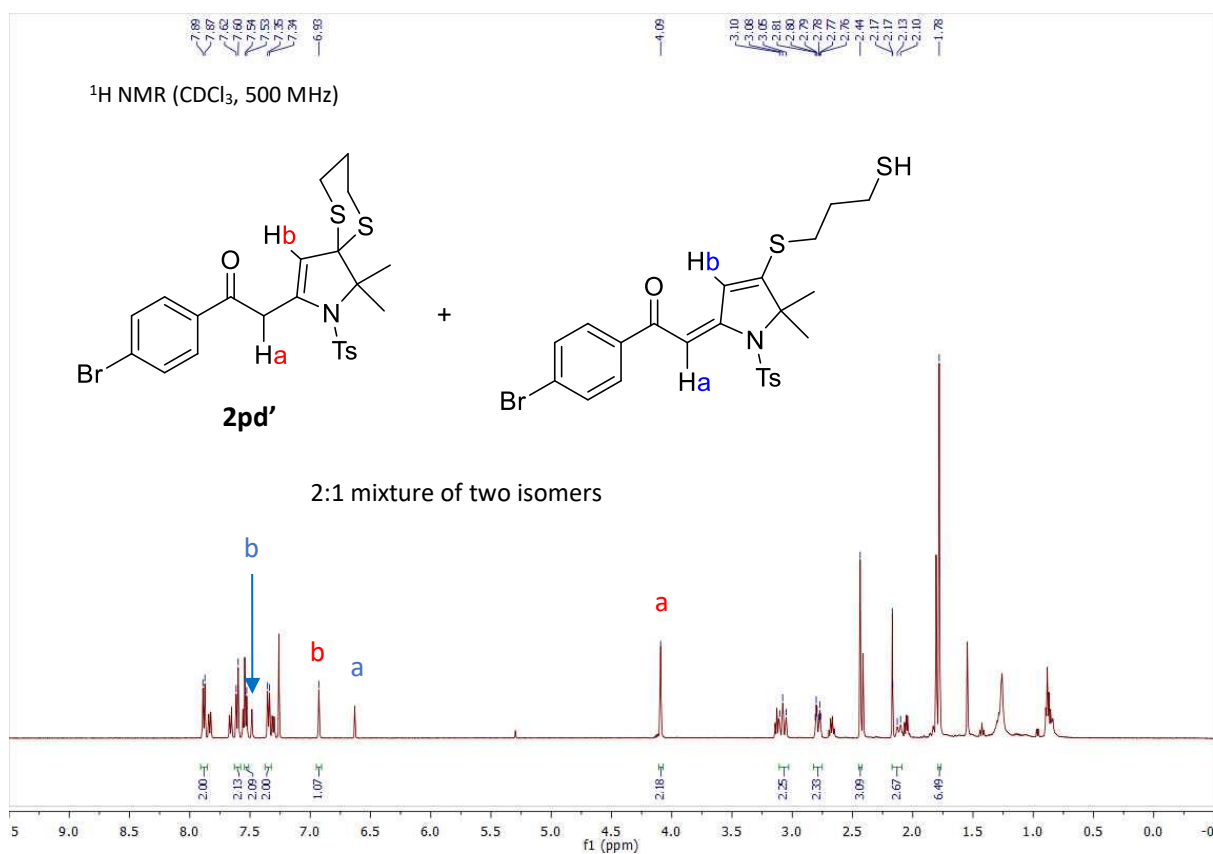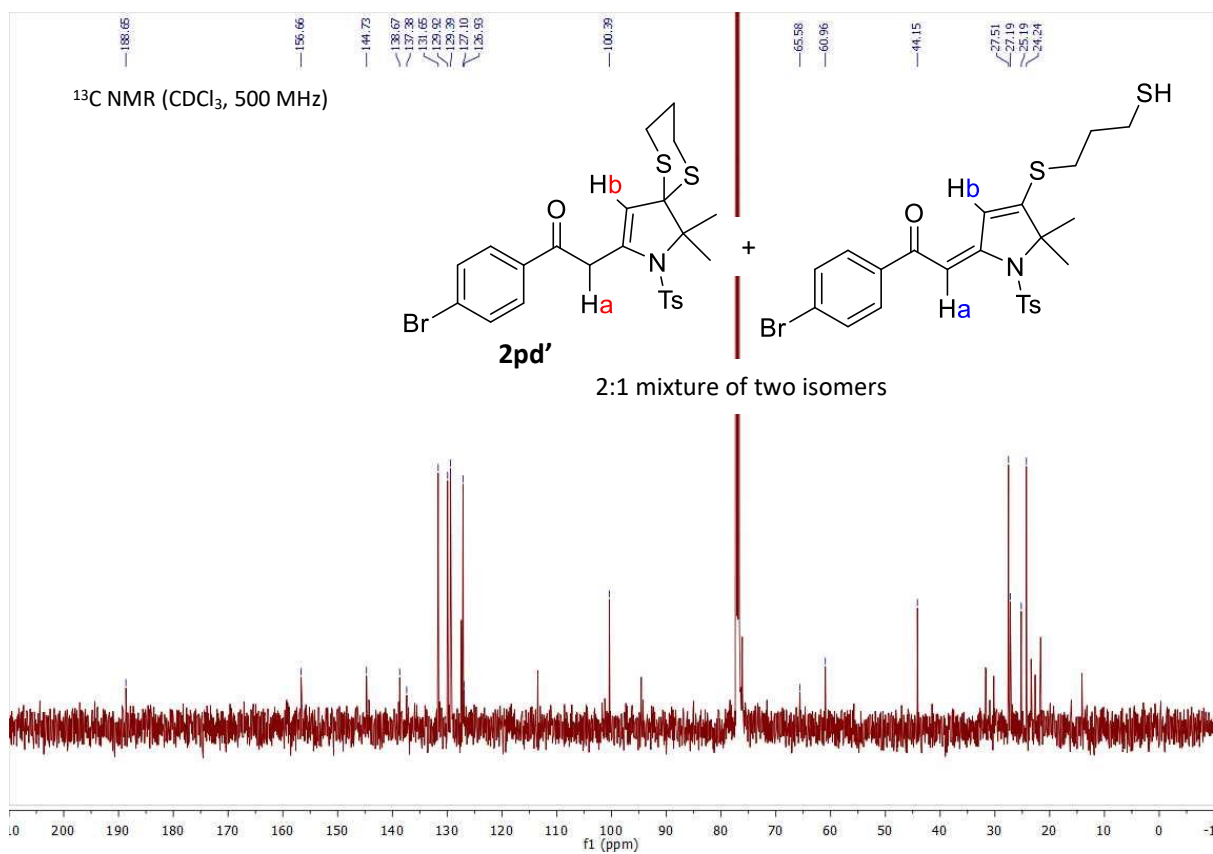

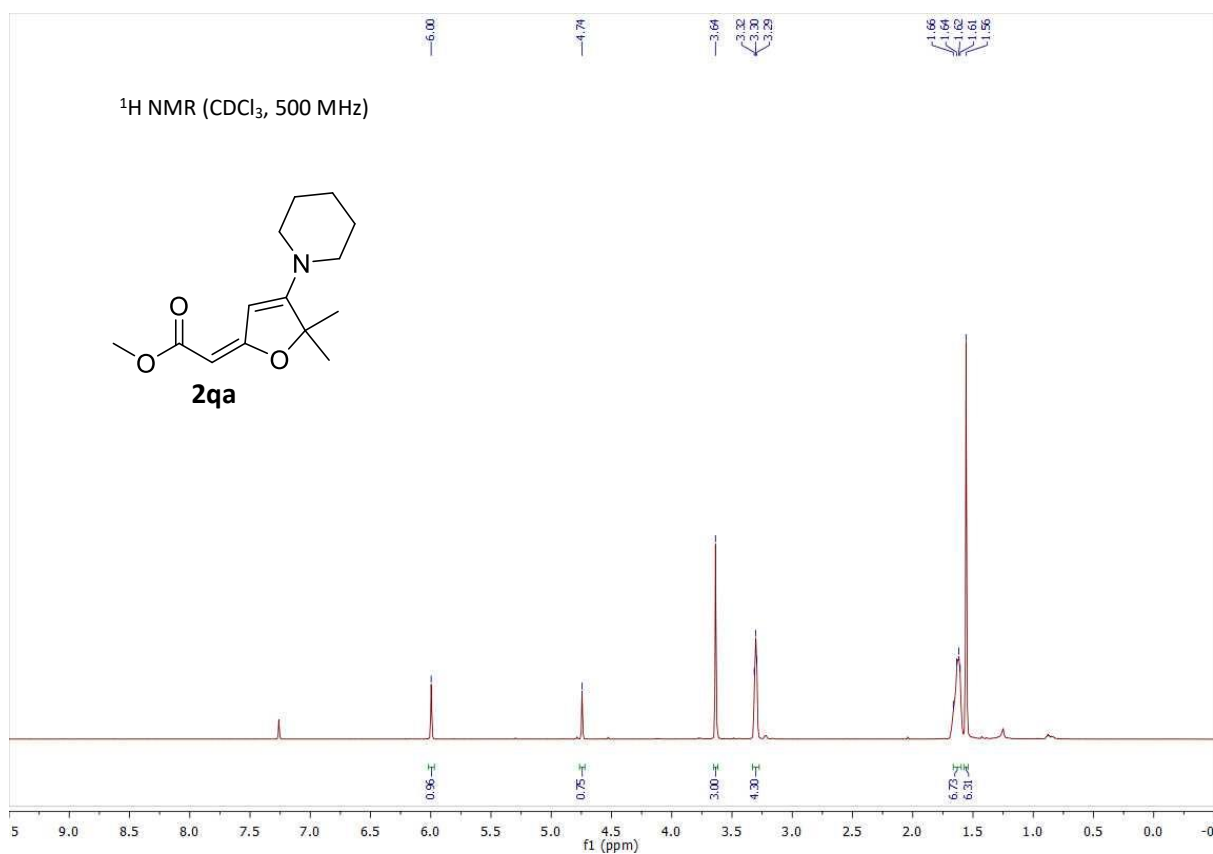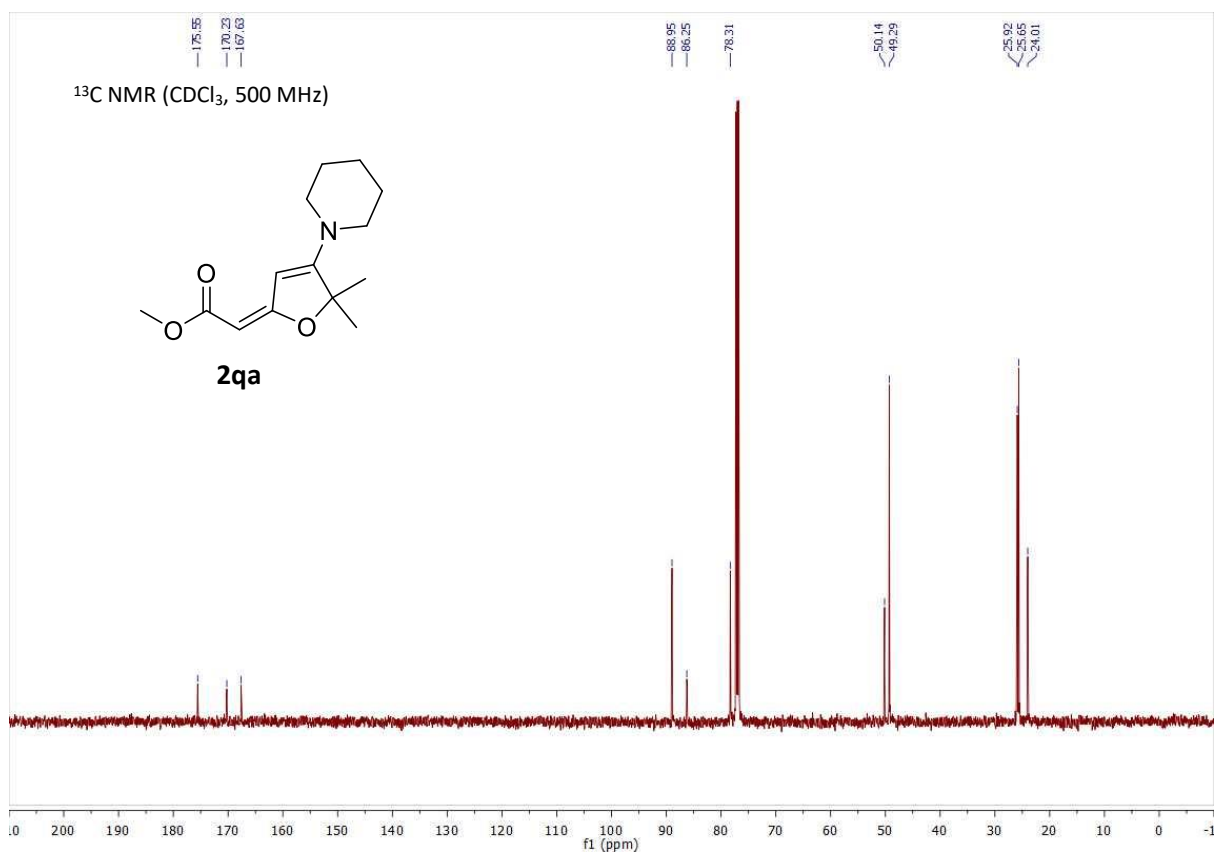

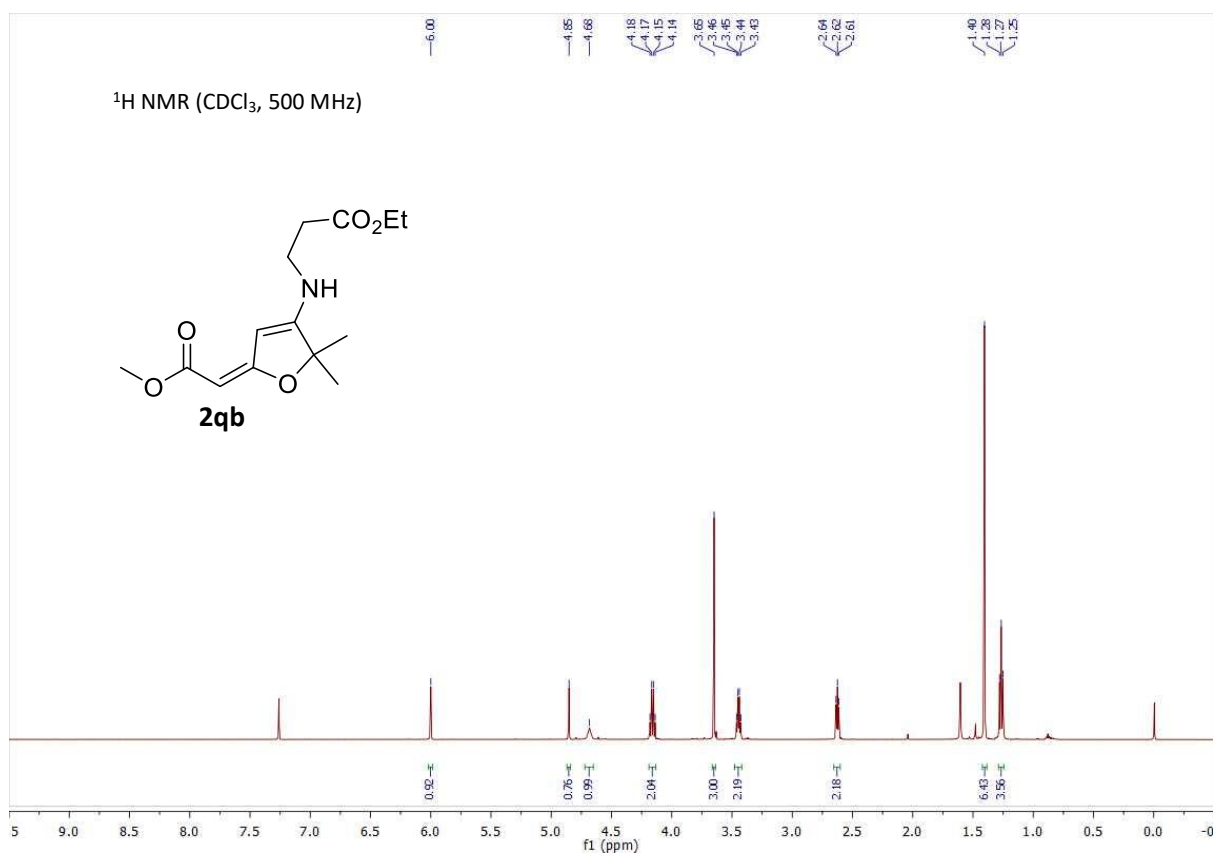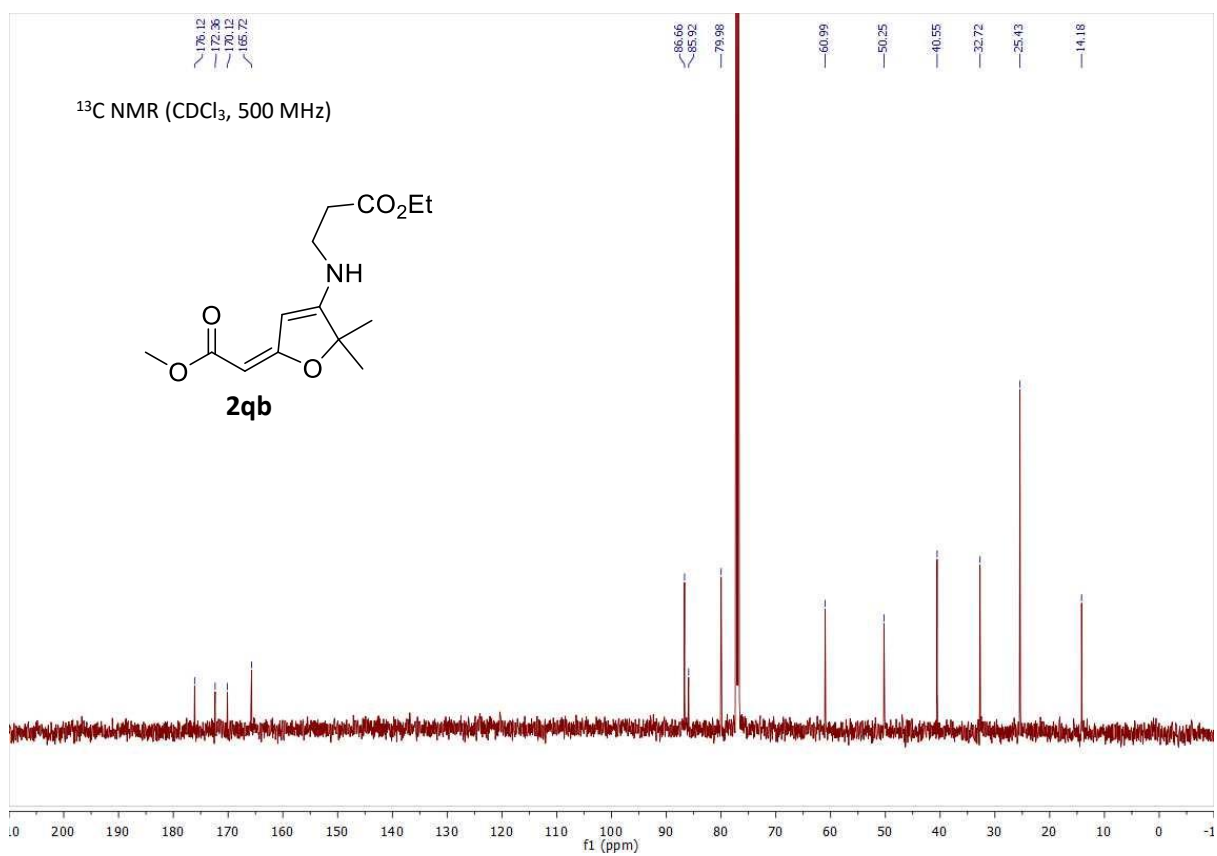

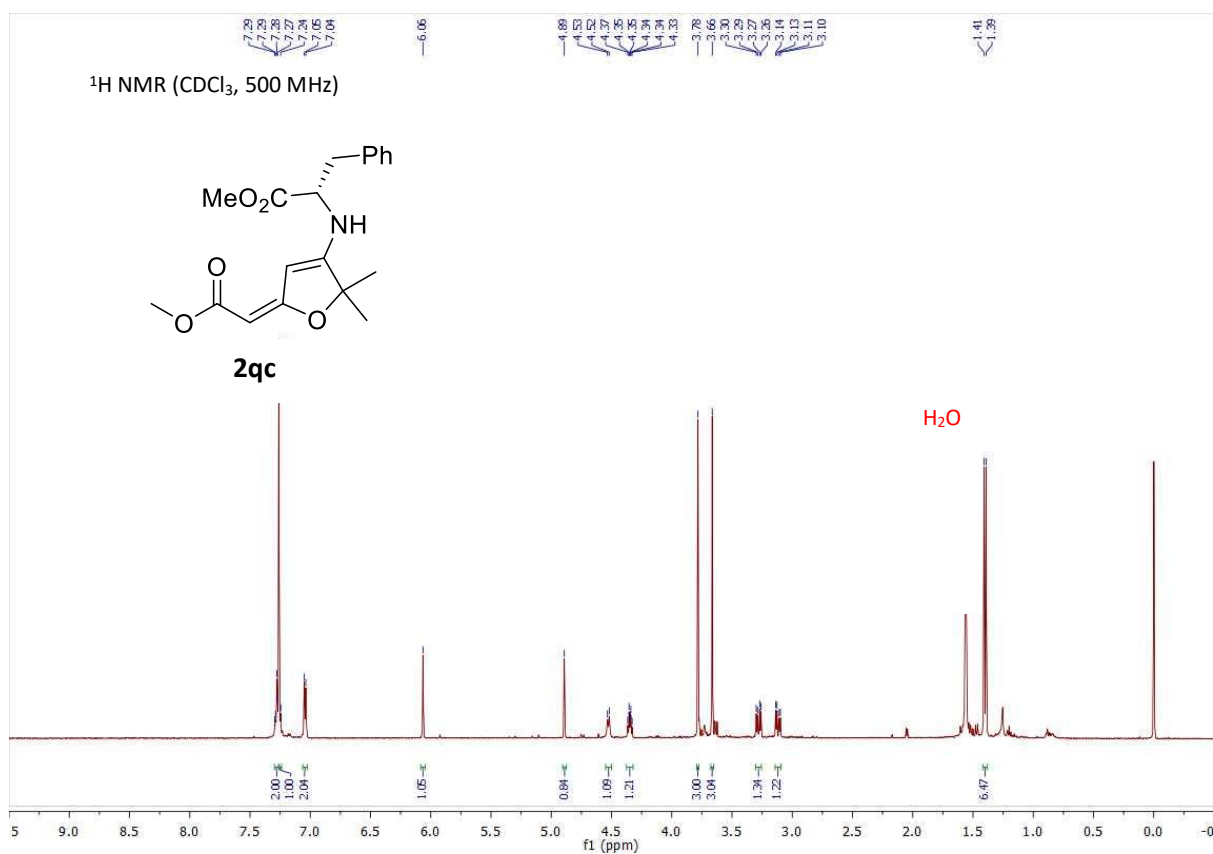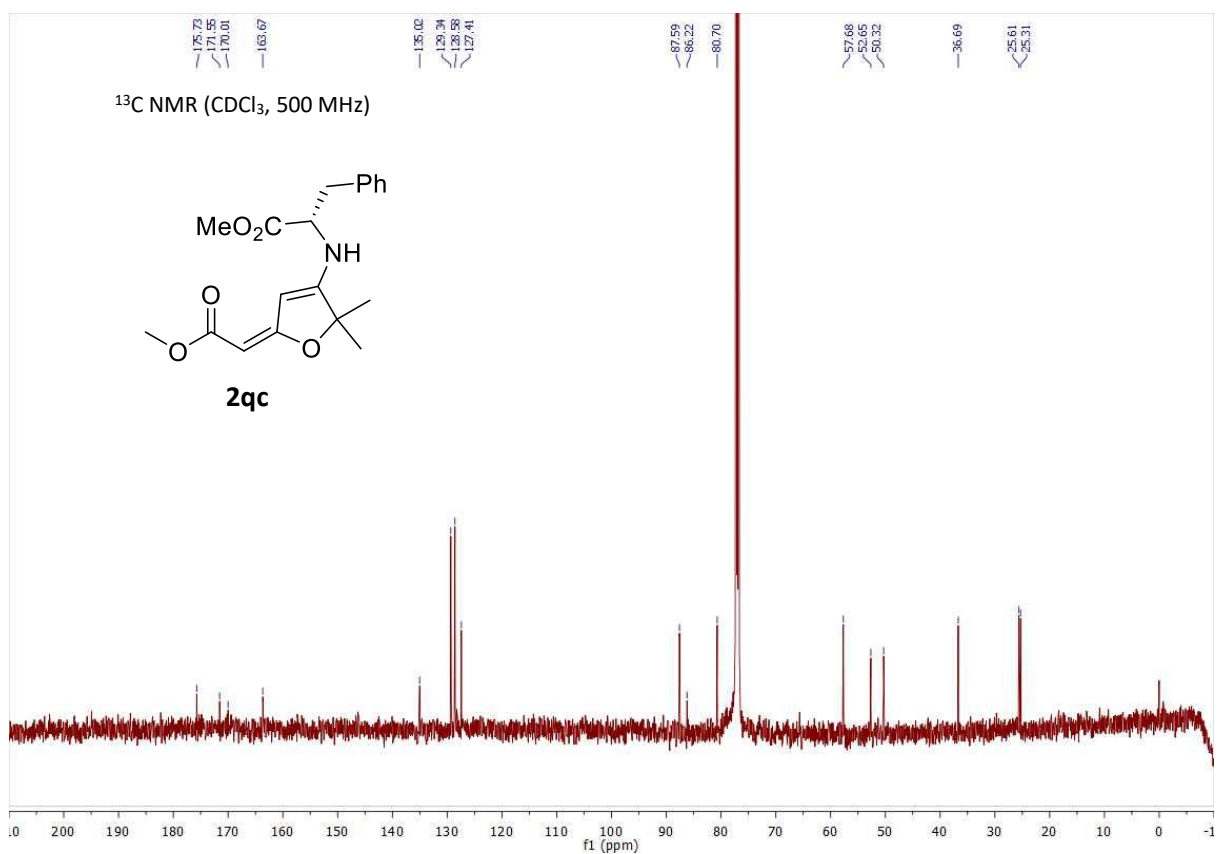







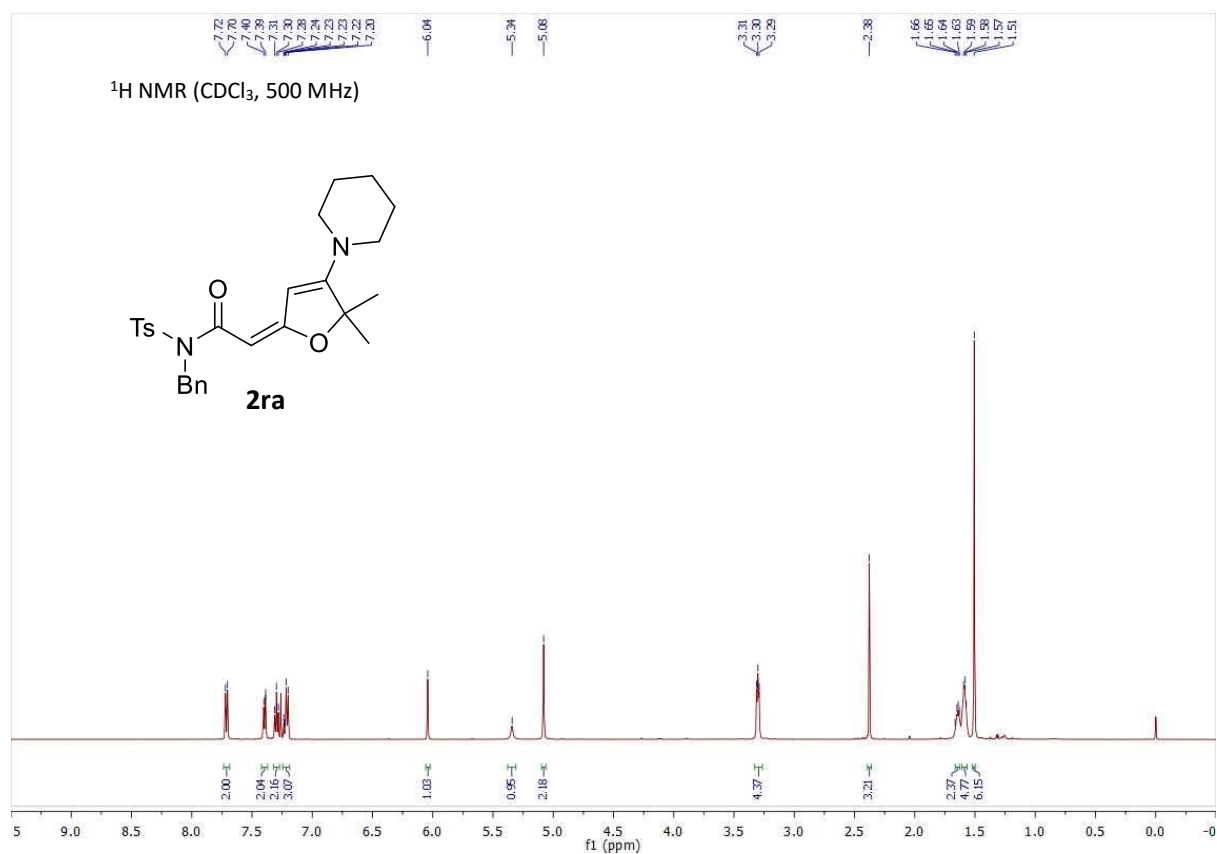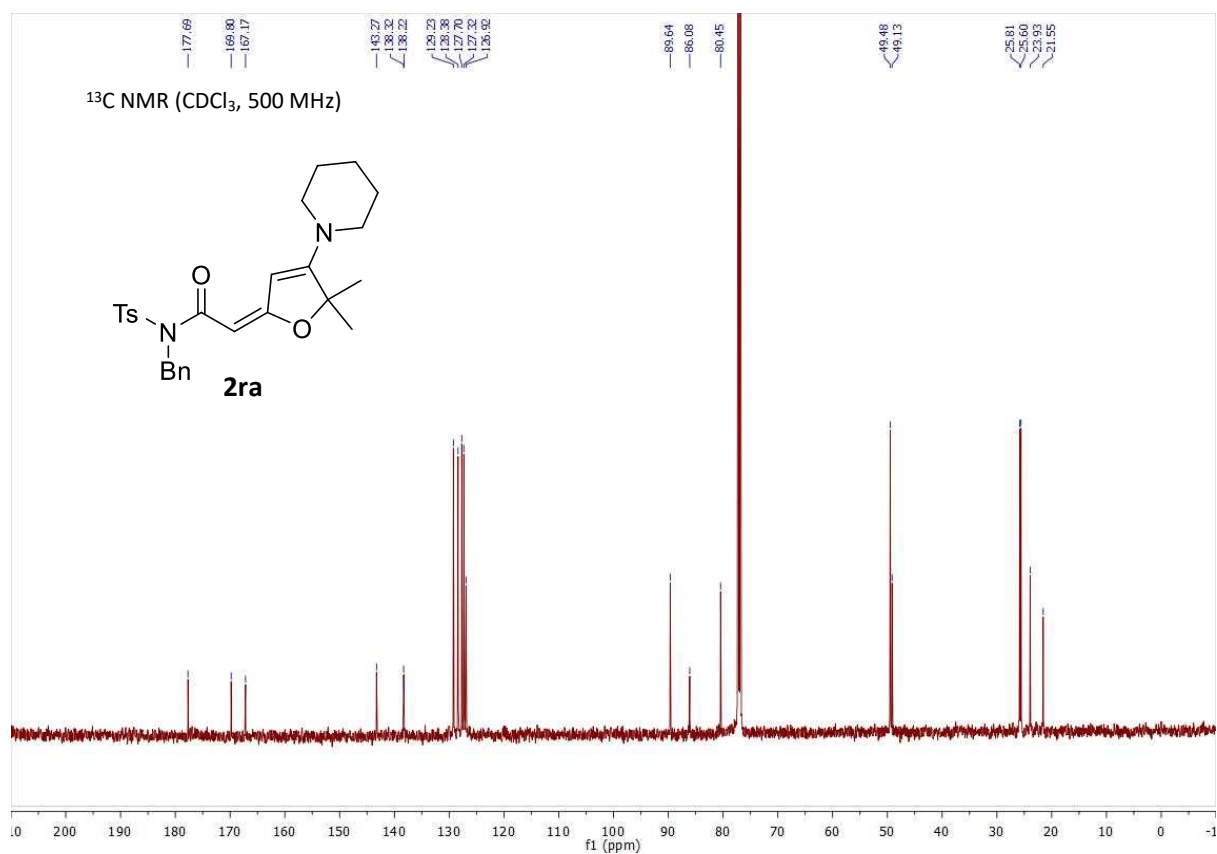

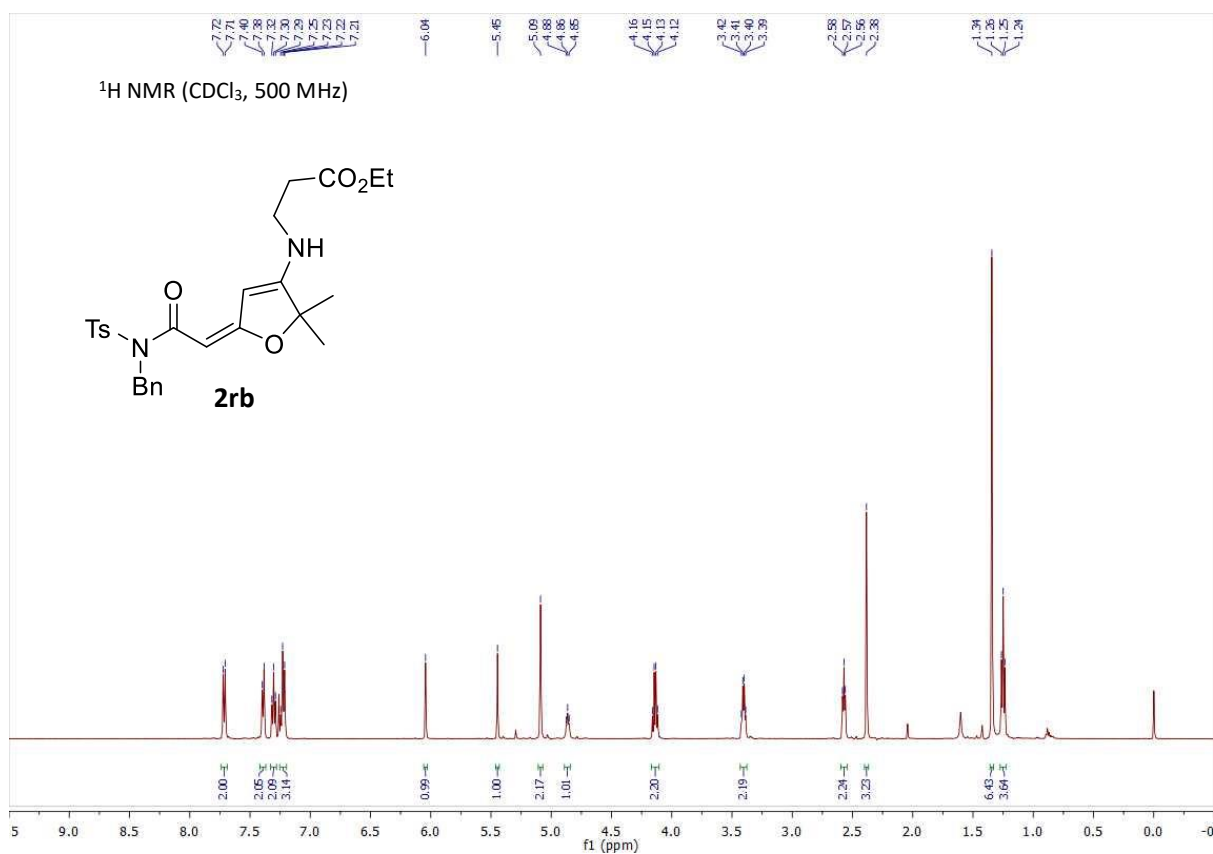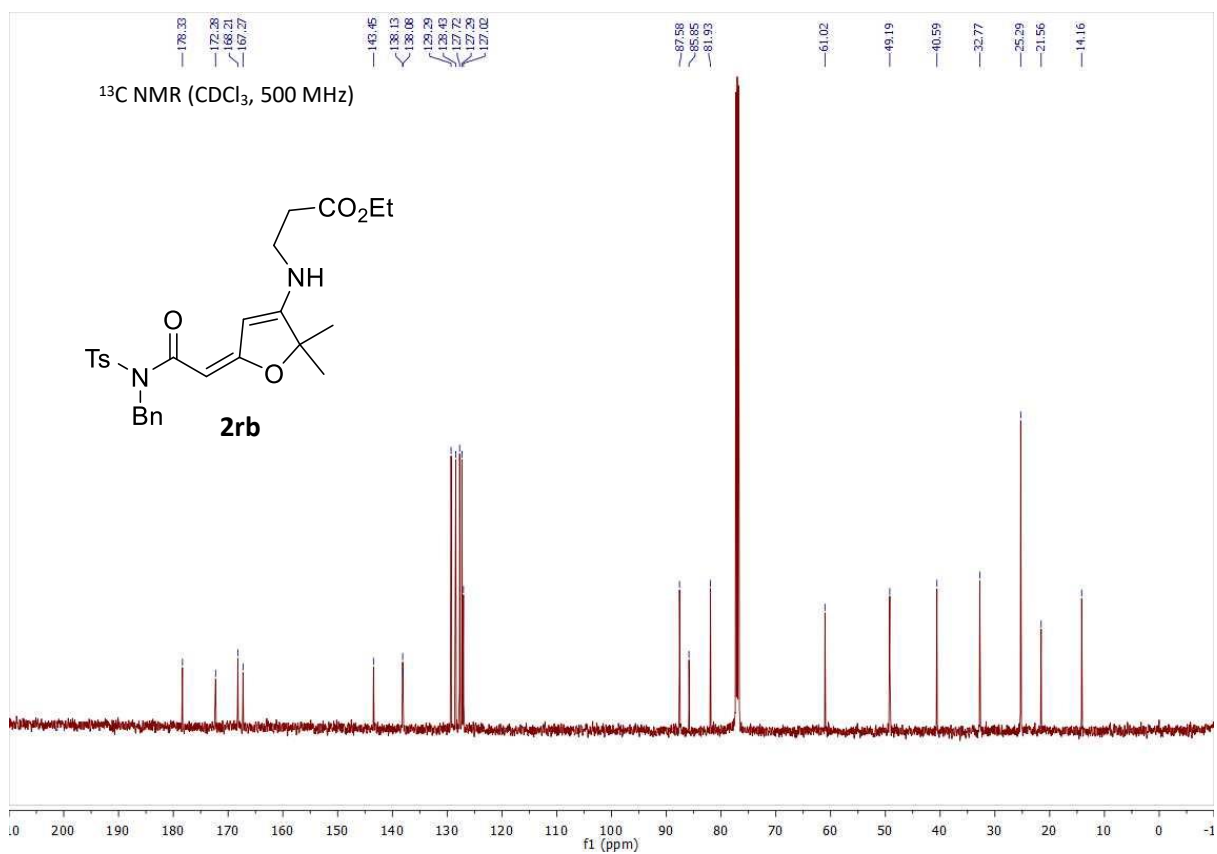

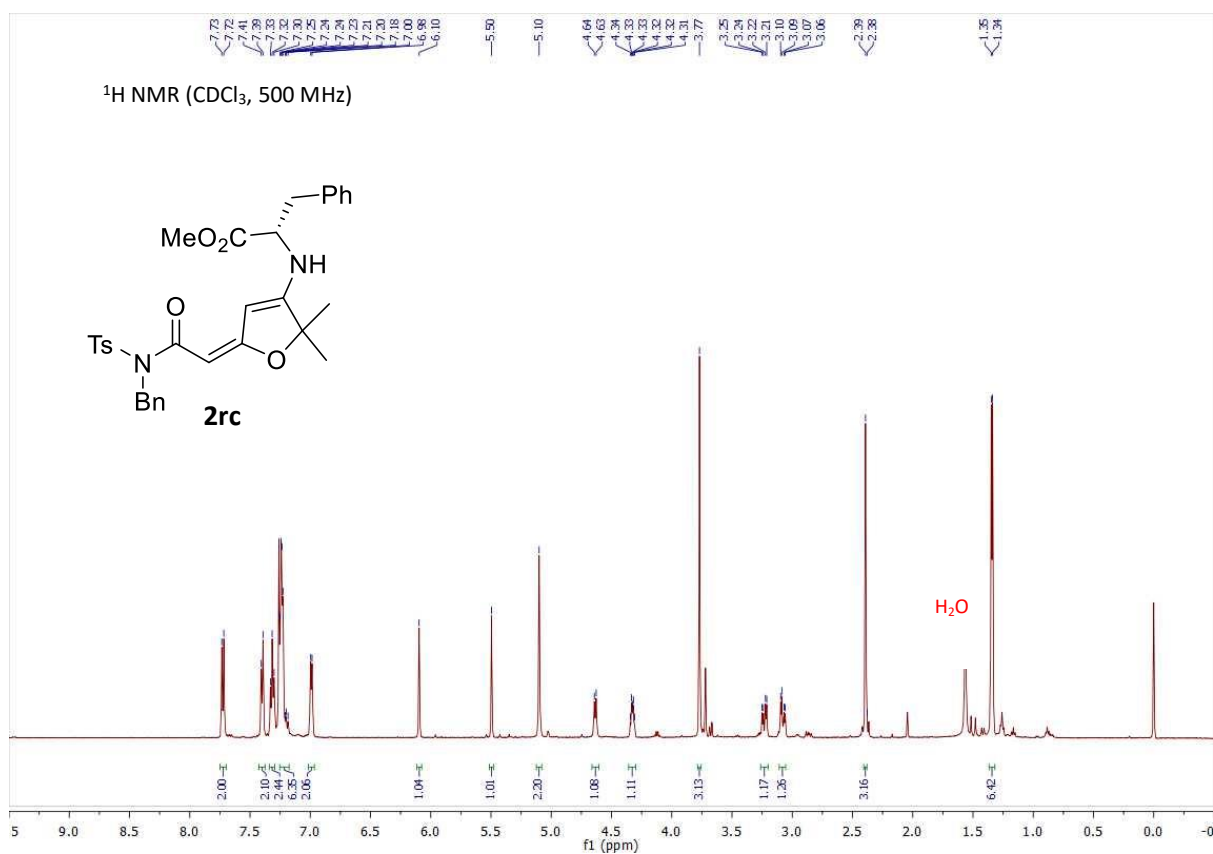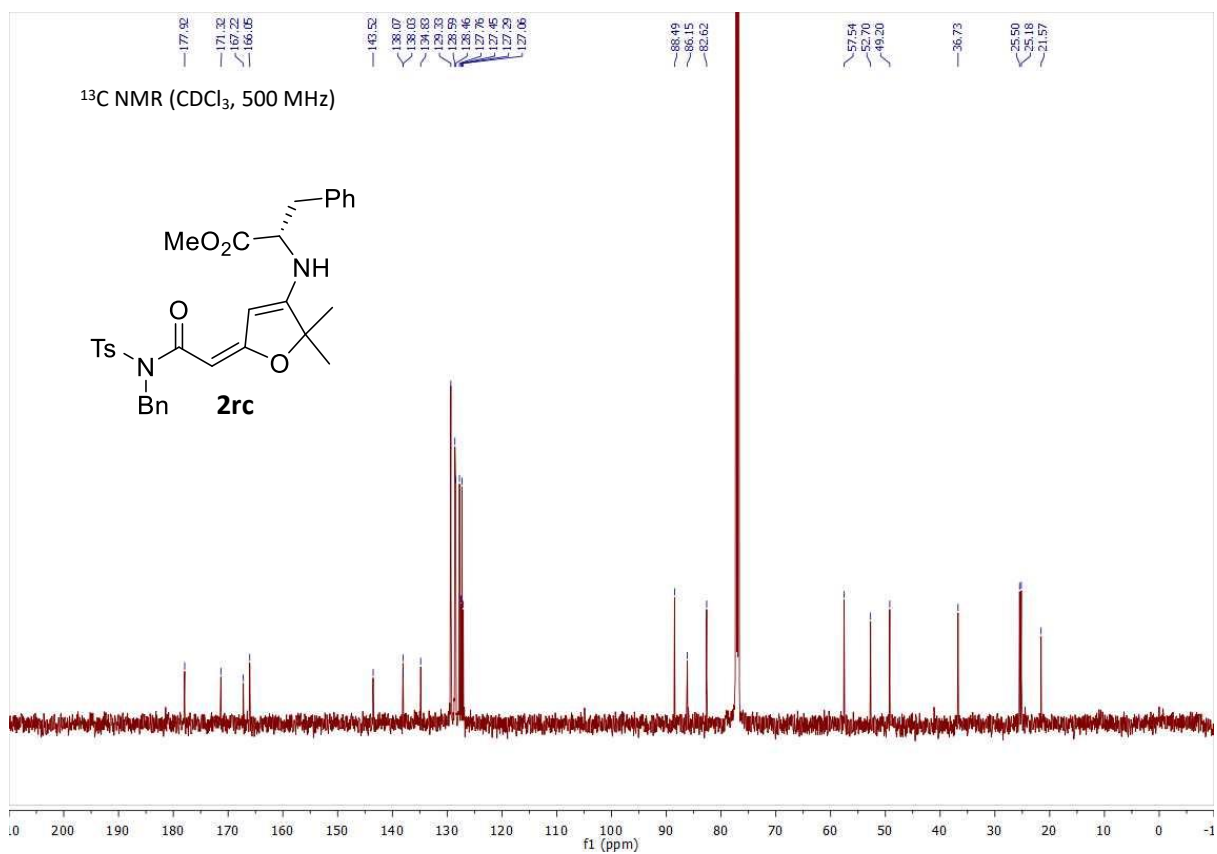

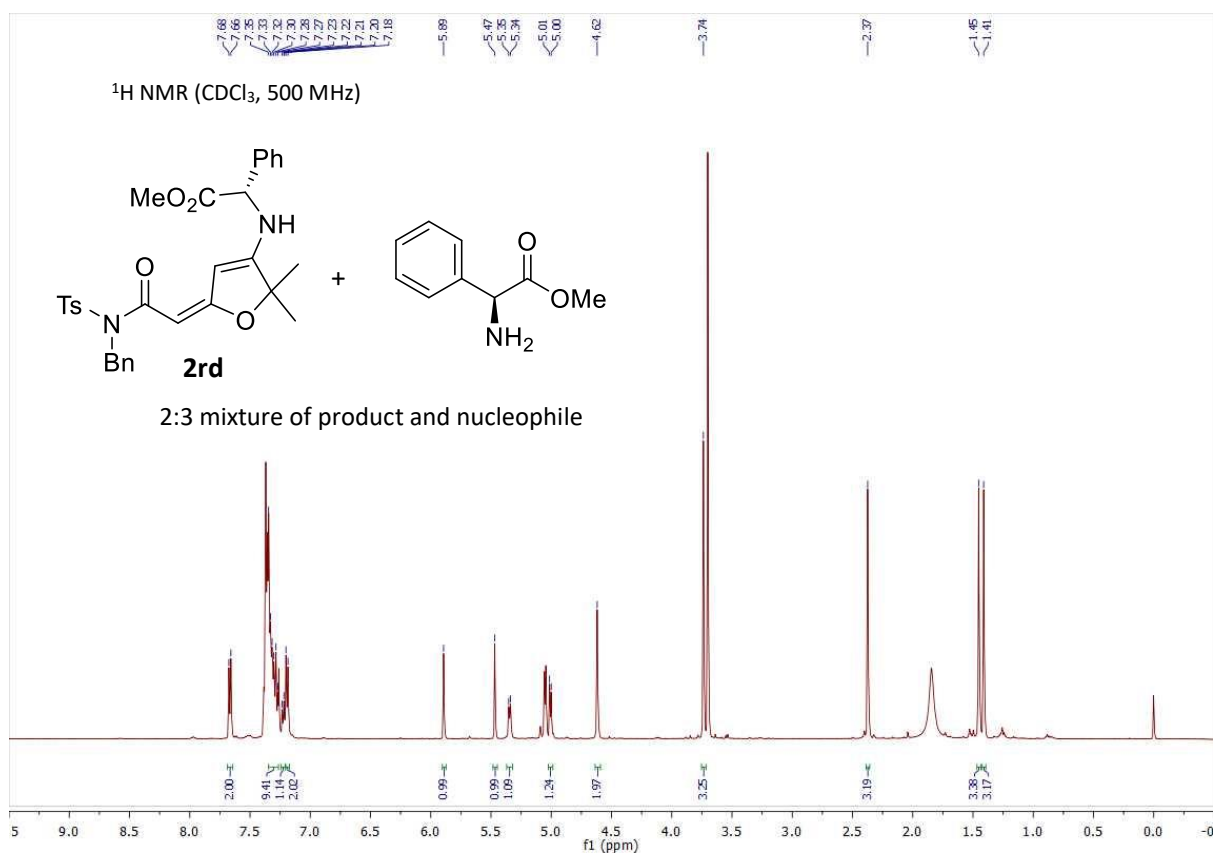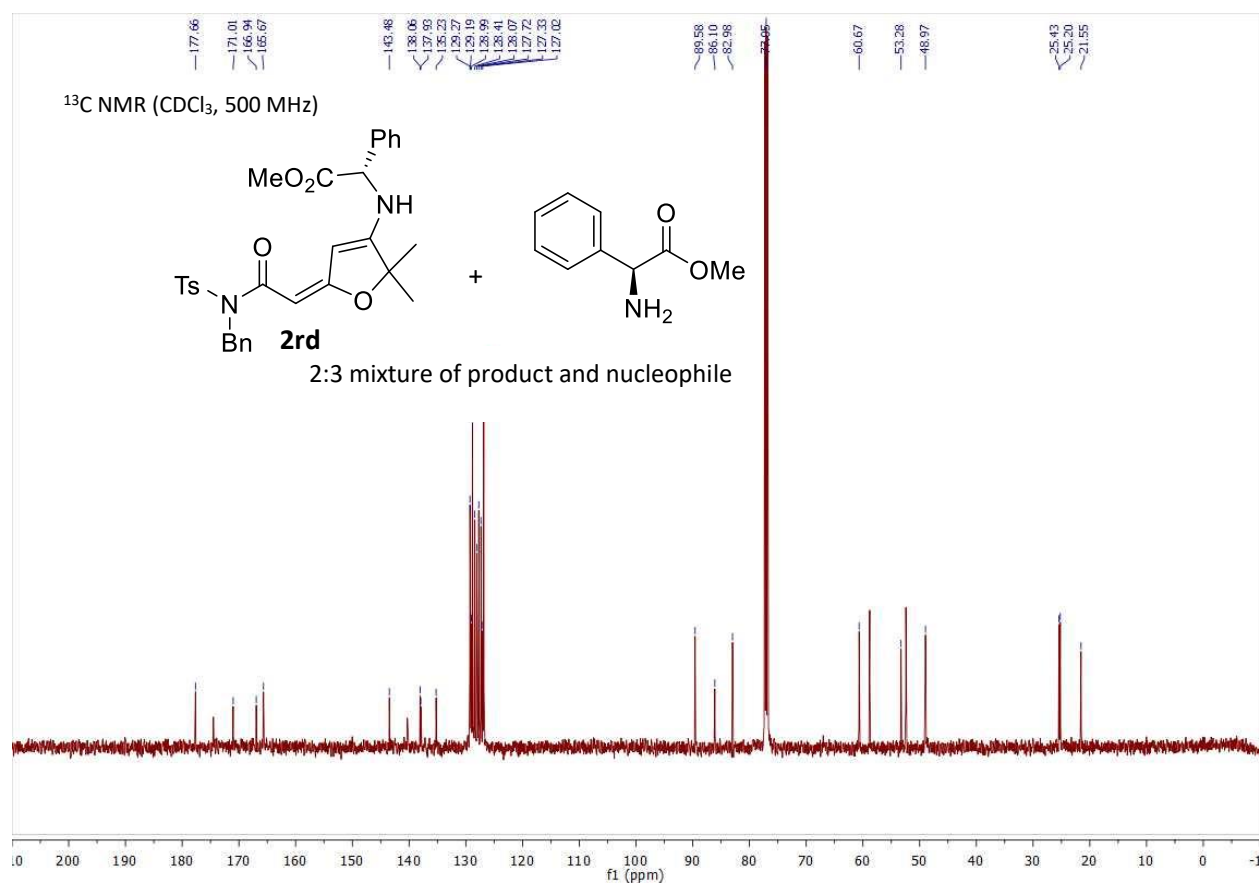

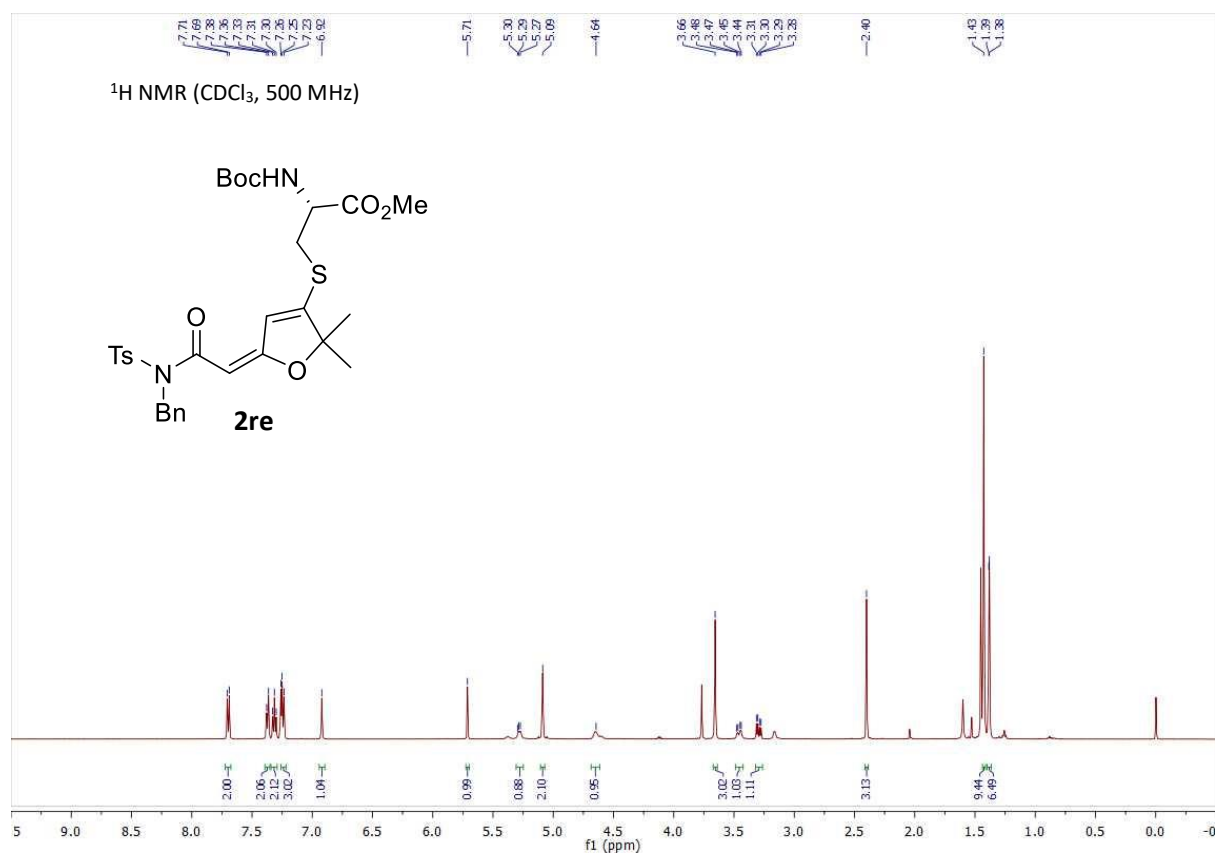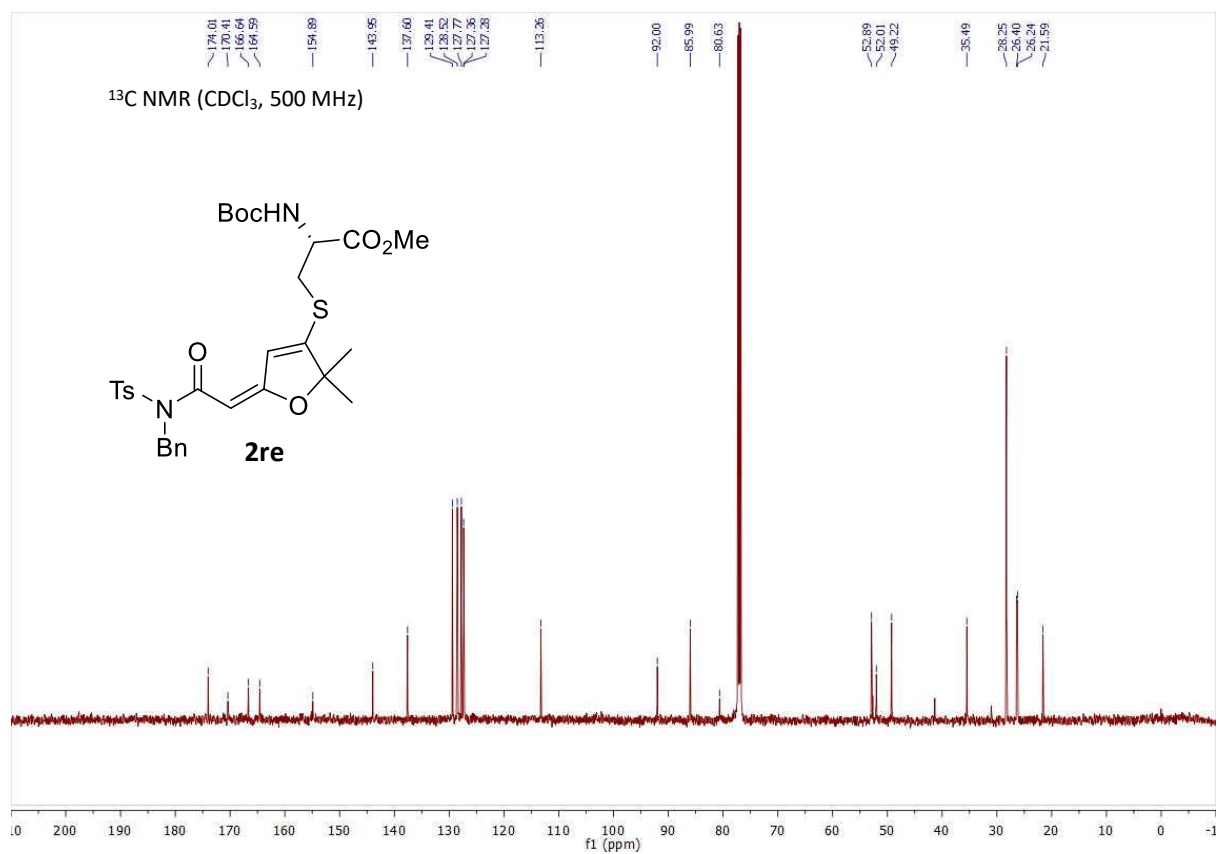

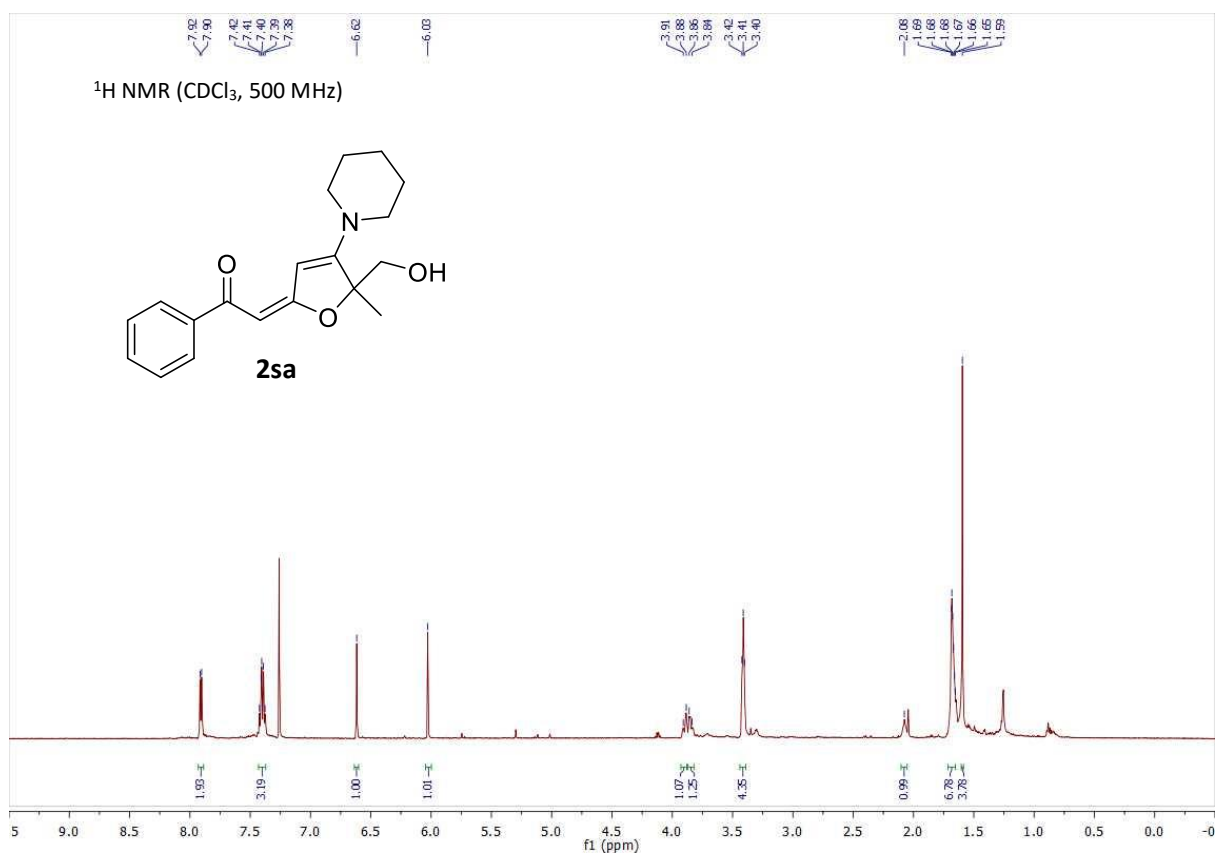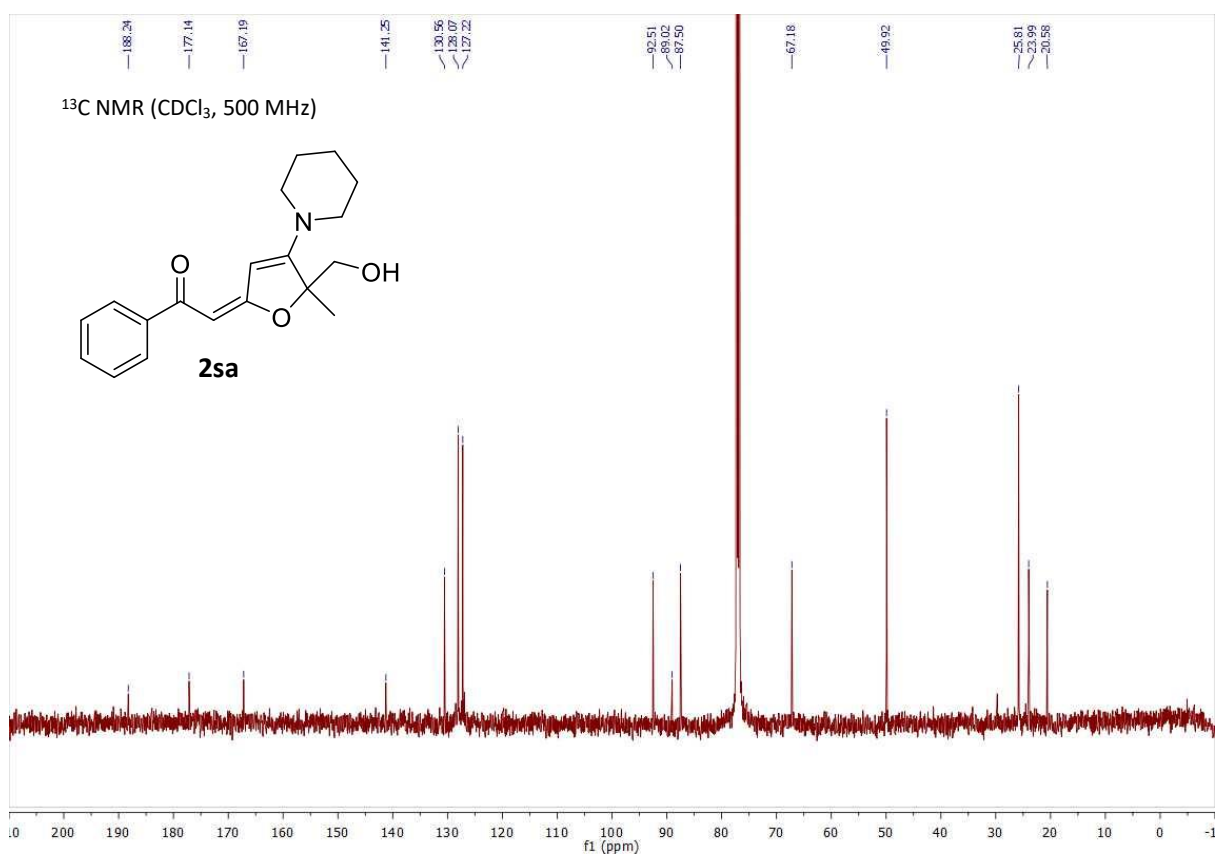



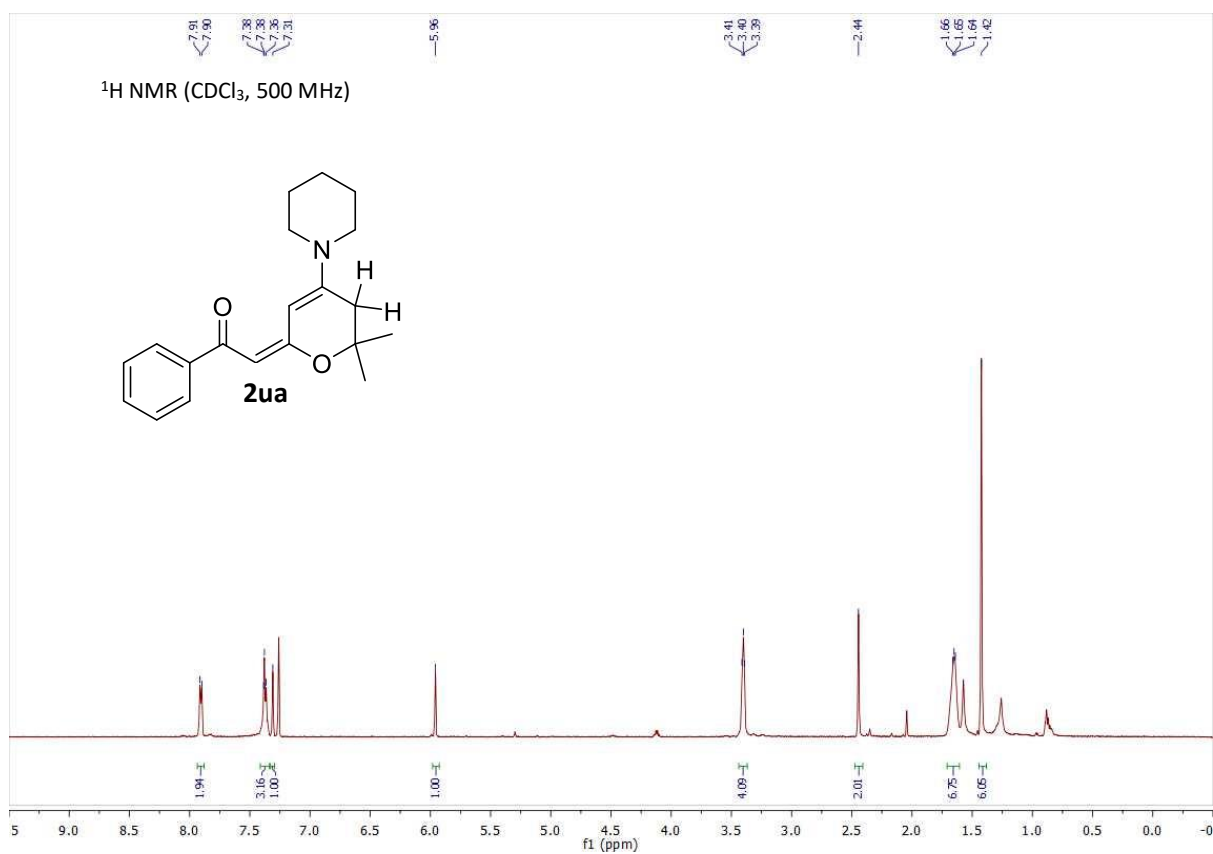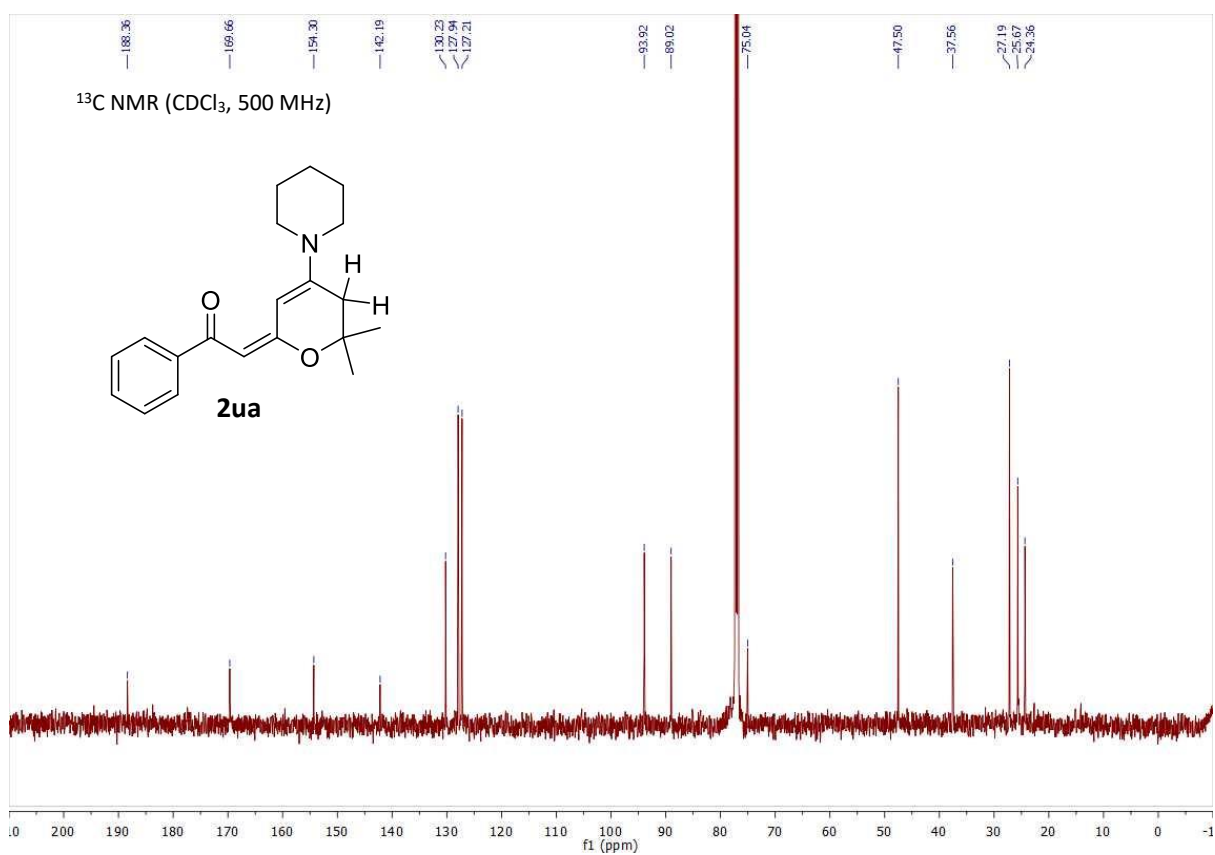

Supplement: d2qo01730j2.pdf [file d2qo01730j2.pdf]
